# Supplementary material
Source: Royal Society of Chemistry journal article supplement (doi:10.1039/d5ay01801c)
Supplement: d5ay01801c1.xlsx [file d5ay01801c1.xlsx]

## Sheet: MP_PTIR_Selected
id
PSL_18
PSL_20
PSL_27
PSL_38
PSL_43
PSL_47
PSL_55
PSL_56
PSL_62
PSL_64
PSL_68
PE_4
PE_10
PE_12
PE_16
PE_18
PE_19
PE_21
PE_22
PE_24
PE_25
PE_28
PE_29
PE_30
PE_31
PE_32
PE_33
PE_34
PE_38
PE_39
PE_40
PE_43
PE_44
PE_46
PE_48
PE_49
PE_52
PE_53
PE_59
PE_60
PP_3
PP_4
PP_30
PP_32
PP_35
PP_39
PP_45
PP_50
PP_65
PP_68
PP_72
PP_77
PP_90
PP_92
PP_93
