# Supplementary material
Source: Royal Society of Chemistry journal article supplement (doi:10.1039/d5ay01801c)
Supplement: d5ay01801c2.xlsx [file d5ay01801c2.xlsx]

## Sheet: MP_Raman_Selected
id
PSL_12
PSL_13
PSL_17
PSL_18
PSL_19
PSL_27
PSL_30
PSL_31
PSL_38
PSL_39
PSL_43
PSL_47
PSL_52
PSL_54
PSL_55
PSL_56
PSL_58
PSL_60
PSL_61
PSL_62
PSL_63
PSL_64
PSL_65
PSL_68
PE_4
PE_7
PE_9
PE_10
PE_12
PE_16
PE_18
PE_19
PE_20
PE_22
PE_24
PE_25
PE_28
PE_38
PE_40
PE_42
PE_45
PE_51
PE_53
PE_57
PE_58
PP_2
PP_3
PP_4
PP_5
PP_9
PP_11
PP_16
PP_18
PP_25
PP_32
PP_35
PP_39
PP_45
PP_50
PP_65
PP_68
PP_71
PP_72
PP_77
PP_84
PP_90
PP_92
PP_93
PP_94
