# Supplementary material
Source: Royal Society of Chemistry journal article supplement (doi:10.1039/d5ay01801c)
Supplement: d5ay01801c5.xlsx [file d5ay01801c5.xlsx]

## Sheet: Sheet2
Wavenumber	Magnesium Stearate_1	Magnesium Stearate_5	Magnesium Stearate_11	Magnesium Stearate_12	Magnesium Stearate_13	Magnesium Stearate_15	Magnesium Stearate_16	Magnesium Stearate_17	Magnesium Stearate_18	Magnesium Stearate_20	Magnesium Stearate_33	Magnesium Stearate_36	Magnesium Stearate_40	Magnesium Stearate_41	Magnesium Stearate_44	Magnesium Stearate_48	Magnesium Stearate_59	Magnesium Stearate_64	Magnesium Stearate_70	Magnesium Stearate_74	Magnesium Stearate_75	Magnesium Stearate_76	Magnesium Stearate_77	Magnesium Stearate_78	Magnesium Stearate_79	Magnesium Stearate_80	Magnesium Stearate_88	Magnesium Stearate_94	Magnesium Stearate_95	Magnesium Stearate_98	Magnesium Stearate_106	Magnesium Stearate_111	Magnesium Stearate_113	Calcium Stearate_1	Calcium Stearate_4	Calcium Stearate_9	Calcium Stearate_10	Calcium Stearate_11	Calcium Stearate_12	Calcium Stearate_16	Calcium Stearate_17	Calcium Stearate_18	Calcium Stearate_20	Calcium Stearate_21	Calcium Stearate_26	Calcium Stearate_29	Calcium Stearate_30	Calcium Stearate_32	Calcium Stearate_35
355	-0.0744079	-0.120705	-0.071494	-0.0145262	-0.0562361	-0.108195	-0.10982	-0.11912	-0.046499	-0.0975435	-0.0242379	-0.0236569	-0.140056	-0.0307948	-0.0395394	-0.108124	-0.118538	-0.0335975	-0.0871884	-0.0887342	-0.0651451	-0.0747341	-0.0857313	-0.0390939	-0.0155867	-0.119478	-0.0763317	-0.0235107	-0.0631018	0.00478742	-0.024139	-0.000137749	-0.0514227	-0.00671661	-0.122947	-0.0743633	-0.102138	-0.0929749	-0.08236	-0.115348	-0.0767426	-0.036116	-0.062941	-0.00671836	-0.052895	-0.0466138	-0.0423885	-0.0801443	-0.0998239
357	-0.0768128	-0.122449	-0.0733144	-0.0457745	-0.0638718	-0.112796	-0.126809	-0.118216	-0.0493059	-0.103016	-0.0247573	-0.0241658	-0.155258	-0.0167065	-0.0417806	-0.0810054	-0.117724	-0.04122	-0.0840224	-0.0798738	-0.0689654	-0.0686472	-0.05399	-0.0396098	-0.0387536	-0.104536	-0.0883908	-0.0289495	-0.0624789	0.00767864	-0.0170971	0.00479372	-0.0493569	-0.00949934	-0.124933	-0.069392	-0.100695	-0.106807	-0.0741685	-0.107294	-0.0737563	-0.0360425	-0.0631926	-0.000919675	-0.0517356	-0.0301641	-0.0411329	-0.0766255	-0.103838
359	-0.0767863	-0.12746	-0.0742867	-0.0451774	-0.0688616	-0.116333	-0.142451	-0.12372	-0.0621635	-0.100585	-0.0301574	-0.0257705	-0.153544	0.0254147	-0.0455578	-0.0784843	-0.116113	-0.0451394	-0.080732	-0.0793893	-0.0704949	-0.0680589	-0.0599568	-0.0385576	-0.0382015	-0.121293	-0.0905174	-0.0348816	-0.0557536	0.000403365	-0.0171941	-0.00541742	-0.0535865	-0.0120931	-0.122072	-0.0664631	-0.0996705	-0.0906745	-0.0646046	-0.109823	-0.0809714	-0.0481681	-0.066088	0.00510277	-0.0514646	-0.0290107	-0.0422356	-0.0749609	-0.105462
361	-0.0764703	-0.133104	-0.0752215	-0.0360111	-0.0731048	-0.119642	-0.156209	-0.130867	-0.0754625	-0.0963121	-0.0358582	-0.0277274	-0.147373	0.0733962	-0.0499723	-0.0822675	-0.114772	-0.0481572	-0.0775348	-0.0816419	-0.071453	-0.0689582	-0.0749028	-0.038216	-0.0323154	-0.143706	-0.0907815	-0.0408332	-0.0485447	-0.00969175	-0.0193781	-0.0192843	-0.058865	-0.0133802	-0.119416	-0.0645418	-0.0986587	-0.0746698	-0.0574331	-0.113093	-0.0890545	-0.0567754	-0.0678252	0.00987052	-0.0518931	-0.0294973	-0.0433792	-0.0741463	-0.105748
363	-0.0790683	-0.137602	-0.0778951	-0.0107069	-0.0756123	-0.123091	-0.151992	-0.140327	-0.0681217	-0.0912599	-0.0325171	-0.0308911	-0.133716	0.116447	-0.0577133	-0.0949367	-0.118533	-0.0503754	-0.0757143	-0.0936348	-0.0717612	-0.072734	-0.0956797	-0.0499584	-0.0263321	-0.149499	-0.095223	-0.0457489	-0.0514149	-0.0258956	-0.0270675	-0.0360606	-0.0599971	-0.0116451	-0.117236	-0.064951	-0.0976771	-0.0589605	-0.0557948	-0.118077	-0.0991447	-0.0572456	-0.0668838	0.0117364	-0.0539397	-0.033777	-0.0446174	-0.075298	-0.102941
365	-0.0838391	-0.140584	-0.0803337	0.000683795	-0.0784881	-0.12648	-0.146054	-0.147964	-0.0642088	-0.0896263	-0.0303973	-0.0342809	-0.128659	0.142908	-0.0671897	-0.10814	-0.124622	-0.0533655	-0.0745593	-0.104649	-0.0716663	-0.0755317	-0.111219	-0.0603794	-0.0275361	-0.152303	-0.0987225	-0.0499306	-0.0557141	-0.0372698	-0.0341775	-0.0472506	-0.0601911	-0.0121703	-0.118997	-0.0660604	-0.0961641	-0.0590409	-0.0615999	-0.119097	-0.105028	-0.0415104	-0.0615916	0.0127675	-0.058076	-0.0345402	-0.0441996	-0.0774352	-0.101056
367	-0.0927346	-0.140688	-0.0823263	-0.0143381	-0.0820629	-0.129755	-0.136846	-0.15214	-0.066803	-0.0944822	-0.0305958	-0.0380999	-0.13993	0.137878	-0.0799606	-0.122357	-0.135126	-0.0578206	-0.074668	-0.113804	-0.0708062	-0.0764728	-0.116815	-0.068292	-0.042384	-0.149436	-0.100434	-0.0527186	-0.0627258	-0.0394755	-0.0401875	-0.0478361	-0.0586045	-0.0144291	-0.12378	-0.0677068	-0.0942435	-0.0712299	-0.073113	-0.117077	-0.107684	-0.0133478	-0.0529629	0.0131586	-0.0638148	-0.0326069	-0.0425117	-0.0803282	-0.099876
369	-0.0950906	-0.144552	-0.0825825	-0.0454573	-0.0847025	-0.132151	-0.134239	-0.147374	-0.0723678	-0.106205	-0.0331374	-0.044105	-0.152762	0.137922	-0.0759502	-0.130663	-0.133319	-0.056705	-0.0757378	-0.115624	-0.0688419	-0.07617	-0.110056	-0.0655588	-0.0490071	-0.146133	-0.0965348	-0.0518637	-0.0682388	-0.038147	-0.0420639	-0.0422125	-0.0575987	-0.0220164	-0.126577	-0.0696189	-0.0936728	-0.0665714	-0.0788346	-0.118293	-0.0975338	-0.021358	-0.0515845	0.00720874	-0.0644494	-0.0312744	-0.0369906	-0.0814258	-0.102051
371	-0.0932519	-0.150829	-0.0817247	-0.0869022	-0.0867421	-0.133984	-0.135866	-0.136872	-0.0798383	-0.122333	-0.0371819	-0.0515124	-0.166596	0.141221	-0.0611754	-0.135178	-0.123615	-0.0520162	-0.077424	-0.112741	-0.0661693	-0.0750693	-0.0953728	-0.0559969	-0.0503544	-0.142551	-0.0890373	-0.0486721	-0.0727903	-0.0345515	-0.0412888	-0.0326061	-0.0569655	-0.0299366	-0.128162	-0.0712169	-0.0937059	-0.0591832	-0.0836223	-0.119945	-0.0862066	-0.034156	-0.0521681	0.000579334	-0.0643649	-0.0302404	-0.0308111	-0.0825218	-0.103969
373	-0.0935541	-0.149723	-0.0826748	-0.0900872	-0.0861459	-0.129838	-0.140382	-0.130965	-0.0822676	-0.119603	-0.0430174	-0.0540085	-0.147932	0.0726866	-0.066216	-0.118434	-0.116815	-0.050899	-0.0809432	-0.115384	-0.0641181	-0.0758802	-0.101362	-0.0604665	-0.0357915	-0.145681	-0.0925394	-0.0512869	-0.0676203	-0.0401395	-0.0468255	-0.0388464	-0.0607882	-0.03057	-0.121995	-0.0692718	-0.0968893	-0.0587054	-0.0908294	-0.119415	-0.0887648	-0.0217968	-0.0573459	-0.000104422	-0.0674126	-0.0308932	-0.0258448	-0.0871363	-0.096806
375	-0.094151	-0.147443	-0.0840664	-0.086983	-0.0860779	-0.125036	-0.145019	-0.124991	-0.082597	-0.114733	-0.0492246	-0.0557052	-0.126235	-0.0018135	-0.0729295	-0.101132	-0.110927	-0.0509079	-0.0848933	-0.119211	-0.064261	-0.0770439	-0.108469	-0.0659238	-0.0217094	-0.150709	-0.0969866	-0.054697	-0.0616669	-0.0456717	-0.051977	-0.0453593	-0.0664102	-0.0314261	-0.120651	-0.0711761	-0.101774	-0.0635928	-0.0950499	-0.117086	-0.0926544	-0.0176278	-0.0638884	-0.00257948	-0.0705124	-0.0321178	-0.0248952	-0.0926946	-0.093089
377	-0.0946492	-0.144517	-0.0865837	-0.0792157	-0.0917156	-0.12156	-0.147797	-0.114424	-0.0743451	-0.113583	-0.0561349	-0.0568535	-0.115039	-0.0484471	-0.0721272	-0.0996473	-0.10811	-0.0547293	-0.0898792	-0.125437	-0.0775913	-0.0786816	-0.103792	-0.0648256	-0.0250935	-0.161537	-0.0973659	-0.057816	-0.0596353	-0.0425122	-0.0489807	-0.0391862	-0.0792613	-0.0326809	-0.127941	-0.0799736	-0.109704	-0.0780884	-0.0939222	-0.111536	-0.0989284	-0.0281259	-0.0728749	-0.00826238	-0.0737056	-0.0343665	-0.0311387	-0.099943	-0.0955425
379	-0.0947818	-0.14349	-0.0909657	-0.0749758	-0.0966476	-0.120766	-0.145906	-0.109804	-0.0705218	-0.114328	-0.0625736	-0.0583173	-0.108739	-0.0795001	-0.0690226	-0.106416	-0.108036	-0.0598883	-0.0964276	-0.129066	-0.08545	-0.0818725	-0.0963679	-0.0640699	-0.0319269	-0.167001	-0.0995886	-0.0608659	-0.0569984	-0.0379089	-0.0472751	-0.03151	-0.087691	-0.0381728	-0.142326	-0.0900877	-0.118382	-0.0857537	-0.0935284	-0.109858	-0.104383	-0.0405701	-0.0829885	-0.0136946	-0.0774339	-0.0409223	-0.0379239	-0.10818	-0.101056
381	-0.0943698	-0.145291	-0.0981242	-0.0759877	-0.100529	-0.123965	-0.137066	-0.114037	-0.0732922	-0.117894	-0.0683099	-0.0602508	-0.109728	-0.0873556	-0.0624905	-0.125473	-0.112046	-0.0670385	-0.105303	-0.128826	-0.0851623	-0.0873759	-0.0848524	-0.0638243	-0.0438958	-0.164479	-0.104556	-0.0638129	-0.0534603	-0.031156	-0.0474916	-0.0215959	-0.0895377	-0.0462349	-0.161014	-0.101001	-0.127515	-0.0892757	-0.0935798	-0.110529	-0.109341	-0.0541949	-0.0937857	-0.0189747	-0.0814868	-0.0500908	-0.0450377	-0.117018	-0.108425
383	-0.0928836	-0.152434	-0.103623	-0.0787354	-0.102108	-0.130813	-0.128545	-0.120652	-0.0759673	-0.122171	-0.0669332	-0.0627756	-0.116162	-0.0962776	-0.0598315	-0.138978	-0.121725	-0.0738651	-0.116167	-0.116621	-0.0842234	-0.0919047	-0.0963645	-0.0642697	-0.0474329	-0.162339	-0.111155	-0.0673885	-0.0535017	-0.0300751	-0.0519219	-0.0219023	-0.0878441	-0.0548426	-0.169797	-0.10309	-0.132076	-0.0638277	-0.104691	-0.125594	-0.110812	-0.0574044	-0.0958299	-0.0257375	-0.0874913	-0.0683285	-0.054385	-0.125774	-0.117531
385	-0.0908586	-0.162256	-0.108289	-0.0823537	-0.102532	-0.139491	-0.120184	-0.128462	-0.0785946	-0.126805	-0.061989	-0.0655971	-0.125325	-0.105735	-0.059115	-0.149698	-0.134248	-0.0805295	-0.128028	-0.0984151	-0.0829579	-0.0959447	-0.119426	-0.0650617	-0.046741	-0.160391	-0.118573	-0.0712794	-0.0553382	-0.031839	-0.0584656	-0.0273349	-0.0843749	-0.0624017	-0.176674	-0.103618	-0.136143	-0.0432359	-0.114861	-0.142521	-0.112144	-0.0595617	-0.0971219	-0.0338349	-0.0937313	-0.0859447	-0.0647044	-0.133215	-0.126619
387	-0.0834174	-0.168516	-0.103505	-0.0787582	-0.102478	-0.149358	-0.126109	-0.123728	-0.0825941	-0.138645	-0.0559133	-0.0655542	-0.128335	-0.104091	-0.0677247	-0.0976357	-0.138071	-0.0652344	-0.125912	-0.111094	-0.098262	-0.0956443	-0.103417	-0.0624242	-0.0545524	-0.160862	-0.121335	-0.0692039	-0.0683889	-0.0356843	-0.0597512	-0.0295006	-0.0858668	-0.063656	-0.179955	-0.101707	-0.14072	-0.0709165	-0.111748	-0.159567	-0.115206	-0.0633011	-0.100488	-0.0483858	-0.099891	-0.0935153	-0.0788916	-0.133292	-0.134348
389	-0.0796674	-0.173488	-0.0989523	-0.0740002	-0.102525	-0.157058	-0.132698	-0.119822	-0.0875381	-0.146664	-0.0518245	-0.0658515	-0.132717	-0.102579	-0.0764549	-0.0632059	-0.142181	-0.0534412	-0.123924	-0.12425	-0.112189	-0.0964763	-0.0897214	-0.0595895	-0.0610542	-0.161723	-0.123954	-0.0686865	-0.0794309	-0.0390348	-0.0601813	-0.0296222	-0.0868572	-0.0649185	-0.182302	-0.105614	-0.143888	-0.0915528	-0.113392	-0.171043	-0.117605	-0.072452	-0.105019	-0.0604862	-0.104182	-0.104377	-0.0865224	-0.135373	-0.138247
391	-0.0929027	-0.174237	-0.0982985	-0.066668	-0.103143	-0.155405	-0.137594	-0.123254	-0.0959705	-0.136606	-0.0563237	-0.0684506	-0.144697	-0.105068	-0.0827822	-0.1214	-0.150184	-0.0629961	-0.126813	-0.129778	-0.115253	-0.103352	-0.097769	-0.057004	-0.0594817	-0.163453	-0.127434	-0.0764831	-0.0786577	-0.0396868	-0.0587018	-0.0222873	-0.0842256	-0.0661927	-0.18333	-0.117733	-0.145065	-0.102251	-0.12175	-0.174658	-0.119069	-0.0892379	-0.111193	-0.0691291	-0.105838	-0.119883	-0.0849028	-0.140278	-0.136741
393	-0.100903	-0.174391	-0.101285	-0.0690099	-0.108555	-0.157058	-0.148211	-0.127115	-0.0989374	-0.131617	-0.0577749	-0.0718994	-0.151575	-0.104686	-0.0918258	-0.154053	-0.158007	-0.0722316	-0.130167	-0.134155	-0.118363	-0.110854	-0.101531	-0.0582511	-0.058968	-0.167719	-0.13135	-0.083688	-0.080095	-0.0416864	-0.0604421	-0.0178613	-0.0836177	-0.0699307	-0.18672	-0.121048	-0.146295	-0.113779	-0.126859	-0.177649	-0.122284	-0.0996727	-0.119278	-0.0800248	-0.108139	-0.134618	-0.0876197	-0.145315	-0.14142
395	-0.102721	-0.173845	-0.10857	-0.0827743	-0.119628	-0.162614	-0.165586	-0.131482	-0.0954509	-0.132614	-0.0556271	-0.0763515	-0.152427	-0.100915	-0.104077	-0.156547	-0.165616	-0.0810899	-0.134069	-0.137175	-0.121528	-0.119093	-0.100233	-0.0640236	-0.0597044	-0.174978	-0.135783	-0.0901944	-0.0841423	-0.0452774	-0.0659841	-0.0168701	-0.0853995	-0.0748341	-0.191228	-0.120201	-0.147549	-0.1257	-0.130432	-0.180345	-0.126328	-0.107104	-0.128267	-0.091986	-0.110746	-0.148988	-0.0923876	-0.150414	-0.149023
397	-0.103253	-0.174228	-0.114311	-0.0922875	-0.122733	-0.164865	-0.176552	-0.136711	-0.100149	-0.136741	-0.0551557	-0.0805342	-0.152098	-0.0996571	-0.114612	-0.129585	-0.171043	-0.0882561	-0.137114	-0.141164	-0.120567	-0.124615	-0.0993681	-0.066265	-0.058782	-0.180425	-0.137265	-0.0932273	-0.0896469	-0.0497902	-0.0746765	-0.0217829	-0.0889435	-0.0795766	-0.195144	-0.117887	-0.149737	-0.136585	-0.12906	-0.178636	-0.136599	-0.107459	-0.133225	-0.098222	-0.113471	-0.154992	-0.0961093	-0.149351	-0.152485
399	-0.103292	-0.174968	-0.119459	-0.10017	-0.122782	-0.165849	-0.18506	-0.142272	-0.107986	-0.142068	-0.0553274	-0.0846135	-0.151316	-0.099363	-0.124489	-0.0913229	-0.175633	-0.0947732	-0.13983	-0.145526	-0.118023	-0.129094	-0.0986692	-0.0671517	-0.0572233	-0.185179	-0.137615	-0.0949277	-0.0957105	-0.0546566	-0.0845775	-0.0289606	-0.0931636	-0.0838303	-0.197498	-0.119916	-0.152099	-0.145144	-0.12758	-0.174381	-0.144313	-0.108044	-0.135649	-0.100183	-0.11578	-0.156071	-0.0996341	-0.148247	-0.155005
401	-0.122985	-0.178482	-0.119443	-0.101653	-0.118805	-0.164629	-0.184176	-0.149786	-0.114427	-0.129567	-0.0622622	-0.0859708	-0.154208	-0.120121	-0.107553	-0.109725	-0.171365	-0.105387	-0.140384	-0.147101	-0.115775	-0.125456	-0.103618	-0.0704763	-0.0463542	-0.186769	-0.13761	-0.0924948	-0.10069	-0.0645035	-0.0913391	-0.0400798	-0.0966768	-0.0862502	-0.194013	-0.13891	-0.154908	-0.145043	-0.126827	-0.1614	-0.140793	-0.111145	-0.129306	-0.087106	-0.116473	-0.140235	-0.102647	-0.148406	-0.154879
403	-0.138062	-0.180715	-0.118271	-0.104382	-0.116103	-0.164604	-0.184946	-0.156608	-0.119457	-0.122364	-0.0699892	-0.0876163	-0.150479	-0.128194	-0.0945272	-0.126605	-0.167061	-0.114322	-0.141041	-0.144303	-0.11597	-0.123379	-0.109062	-0.0781071	-0.0448591	-0.187972	-0.139501	-0.0930999	-0.104777	-0.0713023	-0.0956735	-0.0492655	-0.099286	-0.0860147	-0.192213	-0.148937	-0.155519	-0.139034	-0.129216	-0.157042	-0.138438	-0.115547	-0.131018	-0.0822699	-0.121304	-0.122635	-0.106413	-0.146382	-0.155392
405	-0.138597	-0.179018	-0.113852	-0.111075	-0.117364	-0.168227	-0.191024	-0.161291	-0.120337	-0.131667	-0.0798116	-0.0902291	-0.126865	-0.0976137	-0.0942173	-0.136712	-0.162998	-0.118093	-0.142094	-0.12858	-0.123441	-0.126275	-0.115757	-0.0984835	-0.0716846	-0.188143	-0.147055	-0.102928	-0.106242	-0.0688147	-0.0928938	-0.0525301	-0.0992276	-0.0827997	-0.192305	-0.148903	-0.153666	-0.126398	-0.13513	-0.162358	-0.13739	-0.12141	-0.141766	-0.0866808	-0.130779	-0.103056	-0.111022	-0.141909	-0.156621
407	-0.141656	-0.177481	-0.117278	-0.102949	-0.125186	-0.168722	-0.193159	-0.158524	-0.118571	-0.141037	-0.0876339	-0.0973539	-0.13108	-0.089739	-0.096362	-0.143849	-0.158319	-0.115858	-0.14544	-0.126574	-0.130381	-0.124979	-0.113873	-0.102983	-0.0887136	-0.186316	-0.149231	-0.11069	-0.111987	-0.0729166	-0.0925972	-0.0541283	-0.102802	-0.0875633	-0.186174	-0.145119	-0.15451	-0.129623	-0.135061	-0.167369	-0.143192	-0.129295	-0.143648	-0.0913345	-0.134716	-0.101735	-0.107421	-0.14318	-0.15862
409	-0.147088	-0.176094	-0.128083	-0.0808867	-0.139181	-0.166273	-0.191583	-0.148752	-0.114316	-0.150473	-0.093575	-0.108722	-0.161468	-0.10322	-0.100815	-0.148194	-0.153059	-0.107974	-0.150942	-0.137471	-0.136823	-0.119739	-0.103922	-0.092551	-0.0965284	-0.18261	-0.146347	-0.11651	-0.121758	-0.083216	-0.0946361	-0.0541592	-0.109792	-0.0951982	-0.177804	-0.139984	-0.156325	-0.138557	-0.132838	-0.17227	-0.151461	-0.137906	-0.14234	-0.0960755	-0.13666	-0.106986	-0.100866	-0.146518	-0.160896
411	-0.143948	-0.176437	-0.134363	-0.0771509	-0.133475	-0.166556	-0.193405	-0.15442	-0.121079	-0.156019	-0.102876	-0.115084	-0.174431	-0.125888	-0.107913	-0.162787	-0.156077	-0.104091	-0.154448	-0.137566	-0.137312	-0.119578	-0.0998729	-0.0994947	-0.0959189	-0.176021	-0.142548	-0.119563	-0.122116	-0.0892137	-0.101437	-0.0587882	-0.114415	-0.103553	-0.176041	-0.143826	-0.157827	-0.131492	-0.134902	-0.178222	-0.149701	-0.137187	-0.140185	-0.106547	-0.13785	-0.120146	-0.104343	-0.152707	-0.164532
413	-0.138407	-0.177219	-0.139105	-0.0791378	-0.122899	-0.167579	-0.195666	-0.16459	-0.130862	-0.160348	-0.112686	-0.119785	-0.181798	-0.150284	-0.115512	-0.179656	-0.161598	-0.101684	-0.157322	-0.134152	-0.136248	-0.121062	-0.0973783	-0.110872	-0.0928098	-0.16905	-0.138686	-0.121764	-0.119907	-0.093633	-0.109595	-0.0645848	-0.118334	-0.111074	-0.174166	-0.147236	-0.158812	-0.126418	-0.137457	-0.183469	-0.14634	-0.133844	-0.139386	-0.11095	-0.139196	-0.128732	-0.108654	-0.157882	-0.167312
415	-0.133354	-0.176937	-0.138193	-0.0929104	-0.127706	-0.167873	-0.18654	-0.177691	-0.138552	-0.162115	-0.112855	-0.119142	-0.174585	-0.155645	-0.117728	-0.1829	-0.170642	-0.106778	-0.158715	-0.120795	-0.138055	-0.12711	-0.0923528	-0.11172	-0.0871452	-0.171528	-0.139088	-0.122424	-0.119778	-0.0901387	-0.117966	-0.0674729	-0.121488	-0.116269	-0.171969	-0.149429	-0.158354	-0.126932	-0.141378	-0.186743	-0.138524	-0.123185	-0.142377	-0.098391	-0.140978	-0.124527	-0.115281	-0.160219	-0.167698
417	-0.130038	-0.179277	-0.137098	-0.106442	-0.132756	-0.168296	-0.178388	-0.185969	-0.145163	-0.163708	-0.113557	-0.119324	-0.170898	-0.157748	-0.118717	-0.178913	-0.176324	-0.112947	-0.16001	-0.108977	-0.140644	-0.132171	-0.0863636	-0.109307	-0.0834578	-0.175598	-0.140943	-0.123478	-0.120142	-0.0858507	-0.123795	-0.0651375	-0.124159	-0.119066	-0.172299	-0.144018	-0.159757	-0.125595	-0.142069	-0.185814	-0.133147	-0.112526	-0.143954	-0.0850818	-0.143112	-0.104845	-0.1218	-0.160977	-0.166245
419	-0.130631	-0.187508	-0.135594	-0.119434	-0.138351	-0.169008	-0.172424	-0.183407	-0.149351	-0.164911	-0.115456	-0.12136	-0.175139	-0.152527	-0.11695	-0.15867	-0.174449	-0.121532	-0.161081	-0.100616	-0.144993	-0.135011	-0.0782078	-0.0995651	-0.0842152	-0.183245	-0.146066	-0.12542	-0.121612	-0.0797785	-0.123908	-0.0510604	-0.125743	-0.119717	-0.17489	-0.131803	-0.162825	-0.122601	-0.139867	-0.181125	-0.129954	-0.101867	-0.144266	-0.0711015	-0.145562	-0.0713128	-0.128222	-0.160323	-0.163146
421	-0.141974	-0.191642	-0.138257	-0.113774	-0.142295	-0.170477	-0.182701	-0.184455	-0.148549	-0.17079	-0.112677	-0.125523	-0.176273	-0.151733	-0.116531	-0.155651	-0.175896	-0.126703	-0.163005	-0.113767	-0.147939	-0.146438	-0.0826122	-0.0950885	-0.092711	-0.186869	-0.151115	-0.129281	-0.121069	-0.0838206	-0.12679	-0.0555863	-0.125712	-0.117385	-0.192776	-0.151514	-0.167348	-0.152339	-0.14835	-0.17985	-0.137763	-0.105436	-0.146608	-0.0840364	-0.151633	-0.0855851	-0.132776	-0.165252	-0.160724
423	-0.161357	-0.19271	-0.144039	-0.0941632	-0.145002	-0.172513	-0.205125	-0.188203	-0.144013	-0.180166	-0.106397	-0.131277	-0.175084	-0.15425	-0.11712	-0.165518	-0.179827	-0.12932	-0.165568	-0.143008	-0.149837	-0.164289	-0.0964113	-0.0945501	-0.106995	-0.187483	-0.15611	-0.134578	-0.119021	-0.0954279	-0.131742	-0.0740274	-0.124473	-0.114832	-0.2135	-0.178393	-0.171891	-0.187554	-0.159042	-0.179828	-0.148644	-0.113692	-0.149338	-0.103894	-0.158332	-0.111955	-0.13652	-0.171357	-0.15901
425	-0.168706	-0.194995	-0.156341	-0.110327	-0.146816	-0.181237	-0.209256	-0.193169	-0.14688	-0.187674	-0.104101	-0.133365	-0.173733	-0.170966	-0.122966	-0.17535	-0.189754	-0.14361	-0.172328	-0.169257	-0.152187	-0.169826	-0.105141	-0.122886	-0.117567	-0.19543	-0.163876	-0.13643	-0.141967	-0.107444	-0.139012	-0.0944272	-0.132716	-0.121778	-0.214234	-0.184595	-0.170332	-0.169968	-0.159588	-0.185818	-0.162519	-0.137926	-0.149585	-0.121157	-0.159599	-0.130388	-0.134888	-0.17256	-0.166225
427	-0.173228	-0.198055	-0.168673	-0.131273	-0.148504	-0.191223	-0.208114	-0.198355	-0.151657	-0.194595	-0.103864	-0.135251	-0.173855	-0.189471	-0.129805	-0.184728	-0.200237	-0.159827	-0.179299	-0.19273	-0.155395	-0.172441	-0.113492	-0.15442	-0.126987	-0.20413	-0.171941	-0.137902	-0.166974	-0.119292	-0.146471	-0.113926	-0.142315	-0.127445	-0.213888	-0.189795	-0.170268	-0.155361	-0.160257	-0.191969	-0.173753	-0.155234	-0.15124	-0.133677	-0.16102	-0.146221	-0.137121	-0.173359	-0.171898
429	-0.173528	-0.205928	-0.169851	-0.132329	-0.150635	-0.200793	-0.191837	-0.203373	-0.16057	-0.199529	-0.11508	-0.141757	-0.187449	-0.199092	-0.136317	-0.190097	-0.205183	-0.172841	-0.180799	-0.196582	-0.165476	-0.170468	-0.127334	-0.16397	-0.132592	-0.206716	-0.17783	-0.142006	-0.166618	-0.128915	-0.151566	-0.121922	-0.147442	-0.130398	-0.211247	-0.192869	-0.173381	-0.147082	-0.16119	-0.19846	-0.179375	-0.15783	-0.155888	-0.136119	-0.16277	-0.156531	-0.147562	-0.173299	-0.174296
431	-0.173281	-0.213402	-0.170848	-0.135125	-0.153968	-0.206595	-0.18282	-0.208465	-0.166526	-0.202184	-0.12438	-0.14757	-0.202424	-0.203113	-0.142189	-0.191092	-0.207744	-0.182605	-0.181089	-0.197675	-0.170989	-0.168771	-0.144726	-0.168636	-0.137421	-0.20968	-0.183847	-0.145319	-0.166715	-0.135595	-0.155681	-0.127501	-0.15176	-0.132446	-0.210355	-0.196396	-0.178567	-0.14644	-0.164508	-0.203249	-0.179457	-0.15628	-0.161507	-0.135802	-0.165186	-0.165634	-0.15473	-0.173856	-0.17605
433	-0.172079	-0.220181	-0.171532	-0.140952	-0.159393	-0.205829	-0.186449	-0.213686	-0.167329	-0.200871	-0.130341	-0.152175	-0.219805	-0.197377	-0.146946	-0.184465	-0.206153	-0.186706	-0.179272	-0.193962	-0.168541	-0.167555	-0.168302	-0.164794	-0.140899	-0.213302	-0.190087	-0.147255	-0.167603	-0.137151	-0.158089	-0.128869	-0.154668	-0.133851	-0.210709	-0.200245	-0.185226	-0.151234	-0.169524	-0.206827	-0.175596	-0.15178	-0.167817	-0.133521	-0.168076	-0.173877	-0.159567	-0.174851	-0.177346
435	-0.171473	-0.219778	-0.173643	-0.146232	-0.164952	-0.203739	-0.206254	-0.214239	-0.16626	-0.193244	-0.1354	-0.152707	-0.214639	-0.18677	-0.151377	-0.186347	-0.204745	-0.182504	-0.18118	-0.192307	-0.162145	-0.169681	-0.17735	-0.15862	-0.146785	-0.214377	-0.193035	-0.149372	-0.169883	-0.135942	-0.160383	-0.130935	-0.156472	-0.136625	-0.216548	-0.197315	-0.188963	-0.149154	-0.177008	-0.216446	-0.168768	-0.166321	-0.170171	-0.139638	-0.170337	-0.179844	-0.159927	-0.177532	-0.178433
437	-0.171219	-0.215137	-0.176597	-0.151189	-0.170591	-0.200868	-0.235605	-0.212036	-0.164087	-0.181891	-0.139926	-0.150834	-0.196166	-0.173288	-0.155615	-0.193253	-0.203446	-0.173401	-0.185287	-0.191866	-0.15342	-0.173781	-0.177821	-0.151072	-0.154092	-0.213947	-0.19404	-0.151597	-0.172984	-0.133102	-0.162609	-0.133414	-0.157624	-0.140147	-0.223275	-0.194886	-0.192039	-0.150669	-0.183439	-0.224377	-0.163895	-0.182665	-0.173186	-0.147149	-0.172684	-0.185901	-0.159725	-0.181153	-0.179676
439	-0.182354	-0.219528	-0.181005	-0.135766	-0.174765	-0.209646	-0.250875	-0.212925	-0.165109	-0.191157	-0.143839	-0.153449	-0.195077	-0.184618	-0.160186	-0.188261	-0.20849	-0.180866	-0.1873	-0.207576	-0.154558	-0.182388	-0.182776	-0.150353	-0.157735	-0.214543	-0.18933	-0.157321	-0.1697	-0.145452	-0.162638	-0.137238	-0.158261	-0.147649	-0.229266	-0.205982	-0.194026	-0.190272	-0.178061	-0.21045	-0.17865	-0.186345	-0.187005	-0.153807	-0.176607	-0.195895	-0.161423	-0.18981	-0.182448
441	-0.193172	-0.224153	-0.185496	-0.123685	-0.178077	-0.216195	-0.260483	-0.214237	-0.168106	-0.202899	-0.147031	-0.156025	-0.196378	-0.197791	-0.164806	-0.184302	-0.213445	-0.189345	-0.189356	-0.221491	-0.158389	-0.190513	-0.189015	-0.152249	-0.16027	-0.214266	-0.187488	-0.163522	-0.17073	-0.157604	-0.162382	-0.143441	-0.16068	-0.154103	-0.232716	-0.212371	-0.194004	-0.213464	-0.177161	-0.202044	-0.190109	-0.189232	-0.195562	-0.157635	-0.179468	-0.204295	-0.163953	-0.196002	-0.185853
443	-0.194979	-0.22424	-0.189503	-0.142597	-0.177715	-0.203315	-0.248784	-0.21583	-0.179638	-0.214671	-0.146742	-0.155506	-0.199322	-0.204915	-0.169481	-0.193522	-0.213848	-0.192629	-0.192978	-0.215424	-0.170326	-0.193162	-0.199264	-0.163768	-0.159217	-0.208651	-0.204691	-0.170043	-0.198984	-0.158944	-0.162013	-0.161537	-0.172983	-0.158821	-0.231956	-0.210966	-0.190656	-0.209481	-0.183674	-0.202779	-0.196108	-0.190805	-0.195405	-0.156776	-0.18057	-0.210058	-0.16786	-0.198111	-0.190304
445	-0.196465	-0.22436	-0.191677	-0.154521	-0.180502	-0.197614	-0.245071	-0.217045	-0.190014	-0.221947	-0.148976	-0.156623	-0.2039	-0.209363	-0.174161	-0.20013	-0.214824	-0.193522	-0.195909	-0.210989	-0.176946	-0.194361	-0.203565	-0.170244	-0.154042	-0.209654	-0.213426	-0.174547	-0.212835	-0.159655	-0.16265	-0.175219	-0.179796	-0.161123	-0.23113	-0.207355	-0.188857	-0.199787	-0.187773	-0.206763	-0.193692	-0.194862	-0.195231	-0.157116	-0.180639	-0.213951	-0.173085	-0.202985	-0.192109
447	-0.197509	-0.224526	-0.191334	-0.156848	-0.187614	-0.201769	-0.252322	-0.217742	-0.198805	-0.223049	-0.154672	-0.159985	-0.210723	-0.210137	-0.178848	-0.203153	-0.216588	-0.191135	-0.197892	-0.208794	-0.176267	-0.19357	-0.1997	-0.169796	-0.143208	-0.219743	-0.210536	-0.176283	-0.206915	-0.159503	-0.164668	-0.18284	-0.179069	-0.16207	-0.230267	-0.202506	-0.187926	-0.186889	-0.190518	-0.212568	-0.186554	-0.200314	-0.195047	-0.15813	-0.18013	-0.216795	-0.179049	-0.20941	-0.192431
449	-0.197452	-0.224972	-0.190725	-0.157093	-0.18778	-0.206816	-0.255626	-0.215886	-0.205132	-0.217946	-0.157815	-0.163615	-0.214155	-0.209738	-0.179279	-0.200633	-0.21686	-0.187484	-0.198249	-0.208675	-0.179877	-0.190284	-0.192768	-0.170565	-0.14092	-0.226124	-0.208195	-0.176593	-0.199182	-0.159072	-0.167	-0.184911	-0.178694	-0.162147	-0.228557	-0.202637	-0.189719	-0.182709	-0.186533	-0.214656	-0.185086	-0.202703	-0.196051	-0.165374	-0.180302	-0.211352	-0.181407	-0.212057	-0.194665
451	-0.196889	-0.225547	-0.189994	-0.156384	-0.184762	-0.212272	-0.257121	-0.212861	-0.210329	-0.209998	-0.159789	-0.167367	-0.216034	-0.2088	-0.177758	-0.195572	-0.216449	-0.183253	-0.19786	-0.209508	-0.185452	-0.185855	-0.18443	-0.171891	-0.142551	-0.230803	-0.206106	-0.176249	-0.190618	-0.158515	-0.169476	-0.184437	-0.178481	-0.162147	-0.227307	-0.20425	-0.191836	-0.180882	-0.181011	-0.213586	-0.184064	-0.202279	-0.196591	-0.174417	-0.181059	-0.201558	-0.183017	-0.21389	-0.197007
453	-0.190061	-0.217604	-0.185528	-0.148728	-0.183527	-0.214424	-0.25267	-0.192208	-0.209243	-0.206545	-0.160936	-0.163904	-0.2002	-0.205758	-0.163592	-0.192667	-0.201895	-0.172409	-0.195227	-0.198933	-0.190785	-0.177584	-0.168785	-0.173544	-0.153658	-0.229297	-0.201798	-0.178362	-0.187909	-0.154164	-0.16294	-0.160424	-0.179642	-0.162222	-0.228761	-0.210579	-0.194132	-0.18612	-0.171413	-0.198901	-0.182299	-0.189595	-0.194223	-0.189084	-0.184336	-0.174645	-0.182817	-0.21367	-0.198883
455	-0.183019	-0.211753	-0.181783	-0.137012	-0.182577	-0.215577	-0.248446	-0.175774	-0.205911	-0.201138	-0.161865	-0.159588	-0.185712	-0.201715	-0.149297	-0.184384	-0.186982	-0.162551	-0.192211	-0.180584	-0.192595	-0.16974	-0.15034	-0.173387	-0.158821	-0.227768	-0.197041	-0.176446	-0.184825	-0.14857	-0.156144	-0.129276	-0.179999	-0.162632	-0.226831	-0.203431	-0.195523	-0.179131	-0.163005	-0.184656	-0.172781	-0.176612	-0.18703	-0.191064	-0.187657	-0.153313	-0.183621	-0.20575	-0.198816
457	-0.176411	-0.215242	-0.181415	-0.111727	-0.182328	-0.213702	-0.246209	-0.178262	-0.195551	-0.187674	-0.162153	-0.153539	-0.179611	-0.194407	-0.136989	-0.155927	-0.173494	-0.157599	-0.188227	-0.1359	-0.181513	-0.164207	-0.12303	-0.166521	-0.140311	-0.22736	-0.191068	-0.159251	-0.179228	-0.139141	-0.150142	-0.076487	-0.177136	-0.163482	-0.220471	-0.178636	-0.19573	-0.15613	-0.156157	-0.170989	-0.153109	-0.163237	-0.173518	-0.176432	-0.191035	-0.139291	-0.18574	-0.187745	-0.196204
459	-0.159733	-0.216199	-0.173895	-0.0925532	-0.179265	-0.204095	-0.227306	-0.18121	-0.181321	-0.170782	-0.161297	-0.147755	-0.15965	-0.179294	-0.122465	-0.124815	-0.165994	-0.152676	-0.185458	-0.101666	-0.17255	-0.158902	-0.0979179	-0.151567	-0.126534	-0.224306	-0.188412	-0.147984	-0.162076	-0.124891	-0.144911	-0.0238106	-0.168132	-0.161468	-0.21812	-0.151399	-0.193984	-0.133394	-0.146044	-0.164187	-0.136236	-0.138546	-0.163498	-0.155919	-0.188344	-0.118128	-0.183508	-0.178094	-0.190352
461	-0.132068	-0.214391	-0.158572	-0.0800475	-0.173132	-0.186051	-0.190217	-0.18466	-0.162868	-0.15015	-0.15919	-0.14226	-0.124564	-0.155663	-0.105524	-0.0908038	-0.165026	-0.147785	-0.184016	-0.0788344	-0.165897	-0.153844	-0.0752058	-0.127787	-0.11792	-0.218364	-0.189378	-0.143185	-0.132313	-0.10538	-0.140521	0.0287434	-0.152427	-0.15821	-0.217512	-0.123101	-0.191389	-0.110773	-0.134511	-0.160369	-0.120579	-0.108938	-0.154996	-0.13285	-0.183014	-0.0938639	-0.179386	-0.172074	-0.183092
463	-0.120642	-0.210116	-0.151524	-0.0455651	-0.163596	-0.183229	-0.179763	-0.183989	-0.158497	-0.132775	-0.150961	-0.14085	-0.0978488	-0.125751	-0.0917866	-0.0852449	-0.163251	-0.142301	-0.181248	-0.06083	-0.159379	-0.145802	-0.0459166	-0.105674	-0.11355	-0.210765	-0.166405	-0.140705	-0.113858	-0.096823	-0.141029	0.066331	-0.143424	-0.155443	-0.211097	-0.121586	-0.185815	-0.102514	-0.132668	-0.157588	-0.110725	-0.093494	-0.152293	-0.123348	-0.180216	-0.077302	-0.172565	-0.168172	-0.184336
465	-0.114922	-0.204979	-0.147362	-0.00356372	-0.152926	-0.185688	-0.178504	-0.181875	-0.158921	-0.116639	-0.140567	-0.140874	-0.074121	-0.0938097	-0.0792007	-0.0896234	-0.161137	-0.136662	-0.178021	-0.0446079	-0.152933	-0.136749	-0.0144181	-0.0842433	-0.110703	-0.202575	-0.135176	-0.139027	-0.0993674	-0.0921138	-0.143213	0.098684	-0.136797	-0.152786	-0.20337	-0.12528	-0.180985	-0.0963467	-0.132052	-0.154974	-0.101828	-0.0821151	-0.150272	-0.1169	-0.178129	-0.063763	-0.166137	-0.164699	-0.185423
467	-0.120023	-0.199169	-0.14536	0.0221647	-0.149419	-0.187973	-0.169905	-0.177966	-0.14537	-0.116898	-0.124024	-0.14345	-0.0629972	-0.0844734	-0.0724923	-0.103666	-0.150273	-0.138543	-0.175101	-0.0445892	-0.150318	-0.131245	0.00601062	-0.0786202	-0.115375	-0.191692	-0.111517	-0.137086	-0.0909266	-0.0943422	-0.14174	0.124888	-0.137651	-0.150436	-0.191938	-0.143169	-0.179127	-0.0953813	-0.134311	-0.152789	-0.0954144	-0.0827479	-0.149793	-0.11907	-0.178129	-0.0595485	-0.161438	-0.162403	-0.184795
469	-0.122671	-0.194294	-0.143404	0.0413801	-0.147245	-0.188799	-0.160336	-0.175505	-0.133362	-0.122775	-0.110002	-0.145494	-0.0557626	-0.0799836	-0.0667891	-0.108107	-0.141239	-0.139089	-0.174589	-0.0510541	-0.147921	-0.127817	0.0174296	-0.0747155	-0.119282	-0.182058	-0.0924885	-0.1346	-0.0845339	-0.0938526	-0.142409	0.139877	-0.138811	-0.149847	-0.192551	-0.155644	-0.181835	-0.0933432	-0.13474	-0.151467	-0.0978724	-0.0890552	-0.148248	-0.117296	-0.175351	-0.063281	-0.159218	-0.160376	-0.183102
471	-0.118714	-0.191935	-0.141569	0.043054	-0.148662	-0.185696	-0.148158	-0.176949	-0.125507	-0.143781	-0.102765	-0.146104	-0.0590025	-0.0885475	-0.0637928	-0.0866851	-0.137134	-0.13604	-0.180562	-0.0749813	-0.14611	-0.129976	0.00458225	-0.0754393	-0.121124	-0.175789	-0.0859348	-0.130642	-0.0836571	-0.0860426	-0.148846	0.124659	-0.140797	-0.151095	-0.205729	-0.162471	-0.189305	-0.0901859	-0.13326	-0.151046	-0.109584	-0.101282	-0.145592	-0.11141	-0.169677	-0.0753035	-0.159585	-0.158627	-0.1803
473	-0.126309	-0.196406	-0.140905	0.0355897	-0.149482	-0.181188	-0.151278	-0.181163	-0.120405	-0.151365	-0.0991886	-0.155044	-0.0628718	-0.0952296	-0.0727098	-0.0706076	-0.143957	-0.134266	-0.185008	-0.0702749	-0.143792	-0.136134	-0.00726719	-0.0738127	-0.118695	-0.172929	-0.0817188	-0.134458	-0.0881993	-0.0836781	-0.154002	0.110616	-0.139068	-0.156759	-0.210535	-0.153327	-0.191476	-0.0857778	-0.136609	-0.146399	-0.116488	-0.121002	-0.151629	-0.122027	-0.168357	-0.0811259	-0.162562	-0.157673	-0.179774
475	-0.143945	-0.206814	-0.141261	0.0201813	-0.149784	-0.175459	-0.167698	-0.187785	-0.117696	-0.147283	-0.0987948	-0.171224	-0.0672883	-0.100276	-0.0919833	-0.0591761	-0.16028	-0.133599	-0.188127	-0.0406763	-0.141035	-0.145767	-0.0182491	-0.0701429	-0.112553	-0.173031	-0.0795351	-0.145031	-0.0974523	-0.0860475	-0.158044	0.0975925	-0.134108	-0.163712	-0.212518	-0.139426	-0.191963	-0.081676	-0.141574	-0.140566	-0.121799	-0.142835	-0.160556	-0.137706	-0.168536	-0.0851043	-0.166386	-0.157195	-0.179995
477	-0.15811	-0.215239	-0.149631	0.0152914	-0.148161	-0.180589	-0.179563	-0.193227	-0.118122	-0.15894	-0.100084	-0.178634	-0.104055	-0.131953	-0.109796	-0.0821142	-0.17369	-0.147106	-0.196583	-0.0786591	-0.144694	-0.158926	-0.0428525	-0.0705958	-0.121109	-0.176564	-0.0931868	-0.151953	-0.102098	-0.102406	-0.163195	0.0590649	-0.138572	-0.162115	-0.209831	-0.15141	-0.195267	-0.117322	-0.148617	-0.145678	-0.125911	-0.145917	-0.172116	-0.134711	-0.172834	-0.0992819	-0.169849	-0.168779	-0.180339
479	-0.171137	-0.22281	-0.160185	0.010751	-0.146786	-0.188872	-0.190254	-0.198525	-0.120442	-0.174663	-0.102652	-0.184006	-0.148078	-0.169377	-0.127703	-0.113911	-0.186303	-0.163791	-0.206052	-0.133282	-0.150819	-0.172972	-0.0720405	-0.0733824	-0.134107	-0.181756	-0.111587	-0.158425	-0.106473	-0.122443	-0.16893	0.0125405	-0.145669	-0.162878	-0.209716	-0.164354	-0.198925	-0.149404	-0.157501	-0.152426	-0.134841	-0.153845	-0.182499	-0.134879	-0.177079	-0.120479	-0.17419	-0.179685	-0.182293
481	-0.180251	-0.225132	-0.173251	-0.0277215	-0.156232	-0.203412	-0.200508	-0.20609	-0.139118	-0.192025	-0.117889	-0.191836	-0.179169	-0.192788	-0.152456	-0.148967	-0.197974	-0.17479	-0.210671	-0.182782	-0.169581	-0.187038	-0.118398	-0.0953573	-0.158161	-0.198725	-0.141353	-0.1718	-0.123977	-0.144896	-0.17918	-0.0574467	-0.15669	-0.169661	-0.216156	-0.179742	-0.203488	-0.172405	-0.17108	-0.163343	-0.156053	-0.174122	-0.189878	-0.143105	-0.181189	-0.159565	-0.180767	-0.188859	-0.188355
483	-0.190961	-0.228103	-0.187047	-0.0682204	-0.165888	-0.216364	-0.208202	-0.214132	-0.15763	-0.20929	-0.132313	-0.198342	-0.20589	-0.213639	-0.177021	-0.182714	-0.210294	-0.183511	-0.215286	-0.219484	-0.186272	-0.19937	-0.158771	-0.119754	-0.182784	-0.214027	-0.170054	-0.184778	-0.14423	-0.164579	-0.188803	-0.118213	-0.169133	-0.175328	-0.221927	-0.193597	-0.206469	-0.191508	-0.18339	-0.176948	-0.179918	-0.197176	-0.1949	-0.157409	-0.185118	-0.192549	-0.188373	-0.199211	-0.195125
485	-0.204952	-0.23241	-0.202345	-0.11288	-0.175973	-0.226054	-0.210635	-0.223158	-0.175804	-0.226357	-0.145065	-0.202126	-0.223641	-0.229236	-0.201204	-0.213774	-0.223946	-0.187556	-0.219893	-0.229909	-0.198713	-0.208143	-0.186858	-0.149123	-0.208577	-0.225906	-0.196568	-0.196942	-0.17013	-0.178576	-0.197138	-0.160048	-0.184494	-0.180068	-0.22714	-0.206175	-0.208135	-0.207369	-0.194644	-0.192789	-0.205991	-0.222541	-0.197962	-0.176769	-0.188897	-0.220457	-0.196836	-0.210545	-0.202484
487	-0.216807	-0.237077	-0.212245	-0.161011	-0.187557	-0.233111	-0.220556	-0.226969	-0.190939	-0.23827	-0.158095	-0.204815	-0.231871	-0.2517	-0.216914	-0.247007	-0.2353	-0.20089	-0.224554	-0.239178	-0.206608	-0.21532	-0.211547	-0.171156	-0.220874	-0.232236	-0.215089	-0.205604	-0.197424	-0.18839	-0.20273	-0.192832	-0.197182	-0.183893	-0.227182	-0.21933	-0.210344	-0.219118	-0.20218	-0.209826	-0.212345	-0.237338	-0.2084	-0.195391	-0.194596	-0.230989	-0.200903	-0.215429	-0.206005
489	-0.227188	-0.241992	-0.218421	-0.211538	-0.200175	-0.238353	-0.235643	-0.227182	-0.203975	-0.246625	-0.171318	-0.206747	-0.233531	-0.278903	-0.226777	-0.281738	-0.245068	-0.220634	-0.229252	-0.24765	-0.211367	-0.221397	-0.233893	-0.188127	-0.223859	-0.234737	-0.228093	-0.21185	-0.225681	-0.195319	-0.206429	-0.21937	-0.208025	-0.1875	-0.226502	-0.231674	-0.213164	-0.230235	-0.209593	-0.22777	-0.215346	-0.249277	-0.220645	-0.213883	-0.200603	-0.236964	-0.203705	-0.218906	-0.208645
491	-0.239571	-0.249871	-0.221549	-0.237422	-0.214875	-0.25161	-0.253221	-0.243369	-0.210164	-0.263662	-0.184297	-0.213749	-0.25978	-0.289154	-0.236006	-0.31215	-0.248482	-0.22865	-0.236061	-0.256811	-0.209753	-0.225316	-0.235912	-0.197849	-0.225244	-0.239573	-0.234828	-0.223266	-0.236102	-0.21333	-0.209706	-0.260551	-0.213071	-0.191064	-0.231953	-0.232199	-0.222017	-0.245502	-0.22634	-0.253521	-0.234225	-0.256468	-0.233834	-0.23293	-0.204831	-0.236928	-0.203571	-0.223705	-0.21153
493	-0.250788	-0.256941	-0.224514	-0.258106	-0.22818	-0.264191	-0.270827	-0.261002	-0.215325	-0.279933	-0.197848	-0.221939	-0.286855	-0.295514	-0.244411	-0.334828	-0.251892	-0.234178	-0.242802	-0.269102	-0.209364	-0.228841	-0.242139	-0.207902	-0.226759	-0.245918	-0.239835	-0.234153	-0.243969	-0.230501	-0.211708	-0.303302	-0.217836	-0.194272	-0.231515	-0.241211	-0.228169	-0.260289	-0.237478	-0.268461	-0.252612	-0.266373	-0.24297	-0.248612	-0.211159	-0.249613	-0.20697	-0.228905	-0.214099
495	-0.250986	-0.254435	-0.23004	-0.271087	-0.228697	-0.261933	-0.285553	-0.269524	-0.221392	-0.279894	-0.215888	-0.23258	-0.289654	-0.294268	-0.247565	-0.30617	-0.263113	-0.235941	-0.246442	-0.303468	-0.225813	-0.232142	-0.304261	-0.229316	-0.231202	-0.260445	-0.239927	-0.23479	-0.255119	-0.227841	-0.204889	-0.339499	-0.227696	-0.196783	-0.219558	-0.266825	-0.229037	-0.274135	-0.23764	-0.262254	-0.270036	-0.281589	-0.244176	-0.257713	-0.221596	-0.287183	-0.217282	-0.234889	-0.21605
497	-0.251062	-0.251707	-0.234209	-0.277923	-0.229742	-0.263888	-0.291611	-0.274304	-0.226951	-0.280283	-0.223517	-0.239172	-0.291717	-0.295338	-0.250098	-0.288537	-0.271725	-0.236784	-0.248487	-0.324627	-0.233487	-0.235315	-0.342511	-0.247704	-0.235061	-0.270864	-0.244204	-0.235906	-0.261671	-0.22863	-0.187516	-0.361786	-0.233731	-0.201581	-0.188919	-0.279486	-0.231591	-0.285095	-0.240707	-0.255342	-0.28063	-0.29044	-0.244539	-0.265053	-0.225583	-0.304541	-0.227957	-0.237577	-0.223227
499	-0.250946	-0.248623	-0.236205	-0.274912	-0.231631	-0.272593	-0.283781	-0.273092	-0.231695	-0.281357	-0.214467	-0.239279	-0.292598	-0.300118	-0.251636	-0.288569	-0.276156	-0.236155	-0.247977	-0.324627	-0.227102	-0.238283	-0.342511	-0.261244	-0.237985	-0.274704	-0.255187	-0.237789	-0.260856	-0.234942	-0.153233	-0.361786	-0.233638	-0.20789	-0.145948	-0.283599	-0.235256	-0.294151	-0.245692	-0.247966	-0.286716	-0.29509	-0.244345	-0.271232	-0.225312	-0.308556	-0.238871	-0.238088	-0.233854
501	-0.253255	-0.250699	-0.24119	-0.28892	-0.235251	-0.274199	-0.282993	-0.271053	-0.239782	-0.291019	-0.215673	-0.239804	-0.301913	-0.300231	-0.252875	-0.307143	-0.278639	-0.23815	-0.249464	-0.324627	-0.231187	-0.241946	-0.342511	-0.270076	-0.242619	-0.275882	-0.2693	-0.241977	-0.268767	-0.23851	-0.122804	-0.346377	-0.234484	-0.215841	-0.0902925	-0.281821	-0.237674	-0.300201	-0.250698	-0.253593	-0.289311	-0.298173	-0.246411	-0.280825	-0.223868	-0.307473	-0.243606	-0.239708	-0.239857
503	-0.256879	-0.255573	-0.247796	-0.312154	-0.23981	-0.271958	-0.286023	-0.268567	-0.249682	-0.305336	-0.222438	-0.240556	-0.315801	-0.297813	-0.253951	-0.335769	-0.280065	-0.241569	-0.252033	-0.324627	-0.240948	-0.245987	-0.342511	-0.276357	-0.24818	-0.275618	-0.285112	-0.247414	-0.281408	-0.24059	-0.0944646	-0.322614	-0.235839	-0.223405	-0.0277136	-0.277467	-0.239839	-0.306049	-0.255587	-0.260486	-0.291291	-0.30002	-0.248882	-0.288495	-0.22278	-0.306158	-0.246927	-0.242054	-0.244799
505	-0.266249	-0.270339	-0.257605	-0.332455	-0.244168	-0.269801	-0.306621	-0.271382	-0.26012	-0.306587	-0.229252	-0.244041	-0.317014	-0.29259	-0.263703	-0.338269	-0.278867	-0.260553	-0.259005	-0.324627	-0.247094	-0.250871	-0.342511	-0.278065	-0.263495	-0.277033	-0.289646	-0.253023	-0.285414	-0.241083	-0.106556	-0.342226	-0.239738	-0.226712	0.0679392	-0.261999	-0.241596	-0.313635	-0.259676	-0.262471	-0.292758	-0.295246	-0.251732	-0.279872	-0.225264	-0.308533	-0.247179	-0.248106	-0.247418
507	-0.27203	-0.283862	-0.266229	-0.348934	-0.248091	-0.269036	-0.324961	-0.274358	-0.268678	-0.306587	-0.235574	-0.247256	-0.317014	-0.289301	-0.273713	-0.338269	-0.277913	-0.277453	-0.264914	-0.324627	-0.251906	-0.254766	-0.342511	-0.279664	-0.276156	-0.279073	-0.292351	-0.257599	-0.289149	-0.242073	-0.126446	-0.361786	-0.243911	-0.22933	0.170825	-0.259675	-0.243629	-0.317135	-0.259844	-0.263579	-0.293447	-0.30254	-0.25564	-0.270098	-0.230234	-0.312264	-0.246763	-0.25321	-0.24927
509	-0.258546	-0.287188	-0.267906	-0.348934	-0.250078	-0.274716	-0.324961	-0.275718	-0.268249	-0.306587	-0.23958	-0.247991	-0.317014	-0.296262	-0.281057	-0.338269	-0.279259	-0.277725	-0.263907	-0.324627	-0.252114	-0.253682	-0.342511	-0.28279	-0.272125	-0.28327	-0.291558	-0.257287	-0.295464	-0.246085	-0.164625	-0.361786	-0.248225	-0.230893	0.284803	-0.277506	-0.246086	-0.314369	-0.253999	-0.263341	-0.292944	-0.328339	-0.261171	-0.258562	-0.239017	-0.318074	-0.24532	-0.256862	-0.249945
511	-0.259824	-0.28804	-0.267767	-0.348934	-0.250238	-0.277659	-0.324961	-0.283601	-0.264604	-0.306587	-0.241605	-0.249068	-0.317014	-0.300882	-0.284679	-0.338269	-0.285251	-0.272373	-0.263692	-0.324627	-0.259461	-0.257688	-0.342511	-0.284207	-0.270202	-0.284273	-0.297606	-0.256989	-0.304322	-0.249714	-0.184016	-0.361786	-0.251079	-0.238284	0.347681	-0.269899	-0.246961	-0.326215	-0.254907	-0.269411	-0.301894	-0.33714	-0.264149	-0.25924	-0.245341	-0.330187	-0.248868	-0.258609	-0.248632
513	-0.27981	-0.285756	-0.265326	-0.348934	-0.24808	-0.277133	-0.324961	-0.299752	-0.256886	-0.306587	-0.24112	-0.250577	-0.317014	-0.302537	-0.283586	-0.338269	-0.297129	-0.259893	-0.264482	-0.324627	-0.275853	-0.268148	-0.342511	-0.283458	-0.270949	-0.281229	-0.312321	-0.256708	-0.316401	-0.252855	-0.179597	-0.361786	-0.252083	-0.248692	0.384097	-0.24912	-0.247018	-0.345626	-0.259312	-0.278748	-0.315739	-0.33714	-0.265804	-0.266243	-0.250393	-0.345562	-0.255	-0.25937	-0.246289
515	-0.292583	-0.283982	-0.263553	-0.348934	-0.246979	-0.284345	-0.324961	-0.304512	-0.259754	-0.306587	-0.246194	-0.252838	-0.317014	-0.303217	-0.284845	-0.338269	-0.294358	-0.265726	-0.265521	-0.324627	-0.281151	-0.273514	-0.342511	-0.283206	-0.275848	-0.289082	-0.316659	-0.259455	-0.319961	-0.253994	-0.180185	-0.361786	-0.251363	-0.244316	0.333699	-0.263295	-0.251257	-0.347122	-0.271443	-0.277617	-0.316806	-0.33714	-0.266931	-0.268565	-0.247071	-0.346747	-0.27136	-0.270217	-0.247745
517	-0.302341	-0.282421	-0.262059	-0.348934	-0.246319	-0.294792	-0.324961	-0.304512	-0.267048	-0.306587	-0.253591	-0.255413	-0.317014	-0.30349	-0.287089	-0.338269	-0.285464	-0.279214	-0.266665	-0.324627	-0.281812	-0.276751	-0.342511	-0.283161	-0.282482	-0.30149	-0.316659	-0.263468	-0.319961	-0.254296	-0.182866	-0.361786	-0.249921	-0.240779	0.268954	-0.278319	-0.25498	-0.347122	-0.281842	-0.275702	-0.31424	-0.33714	-0.268074	-0.27083	-0.244632	-0.346747	-0.285369	-0.280098	-0.249259
519	-0.291859	-0.282222	-0.267683	-0.348934	-0.2566	-0.304364	-0.324961	-0.304512	-0.269271	-0.306587	-0.254138	-0.256131	-0.317014	-0.324119	-0.288525	-0.338269	-0.293814	-0.284061	-0.268218	-0.324627	-0.282392	-0.276559	-0.342511	-0.293755	-0.2845	-0.301869	-0.316659	-0.273911	-0.319961	-0.252513	-0.187614	-0.361786	-0.259928	-0.246254	0.173355	-0.284352	-0.254939	-0.347122	-0.281905	-0.274173	-0.300525	-0.33714	-0.269478	-0.274546	-0.249061	-0.346747	-0.28544	-0.282119	-0.249643
521	-0.283713	-0.283138	-0.274374	-0.348934	-0.265401	-0.311678	-0.324961	-0.304512	-0.271056	-0.306587	-0.256759	-0.256264	-0.317014	-0.34042	-0.291544	-0.338269	-0.300631	-0.286035	-0.26974	-0.324627	-0.282542	-0.275801	-0.342511	-0.30213	-0.284035	-0.301869	-0.316659	-0.282728	-0.319961	-0.250919	-0.195094	-0.361786	-0.268433	-0.251225	0.078674	-0.293167	-0.253597	-0.347122	-0.281758	-0.279325	-0.294366	-0.33714	-0.271776	-0.282557	-0.252721	-0.346747	-0.281407	-0.282994	-0.250821
523	-0.285323	-0.287575	-0.28383	-0.348934	-0.268215	-0.311678	-0.324961	-0.304512	-0.271924	-0.306587	-0.266888	-0.254671	-0.317014	-0.34042	-0.299837	-0.338269	-0.300631	-0.279476	-0.27112	-0.324627	-0.28129	-0.273535	-0.342511	-0.30213	-0.275903	-0.301869	-0.316659	-0.285552	-0.319961	-0.250158	-0.211321	-0.361786	-0.270828	-0.255585	-0.01489	-0.305365	-0.250673	-0.347122	-0.281356	-0.292603	-0.297399	-0.33714	-0.275161	-0.295795	-0.255446	-0.346747	-0.272381	-0.282476	-0.252967
525	-0.290865	-0.290384	-0.284496	-0.348934	-0.269508	-0.311678	-0.324961	-0.304512	-0.274228	-0.29826	-0.273186	-0.256679	-0.317014	-0.34042	-0.304002	-0.338269	-0.300631	-0.278153	-0.271709	-0.324627	-0.278765	-0.277058	-0.342511	-0.30213	-0.272877	-0.301869	-0.316659	-0.291289	-0.319961	-0.250953	-0.228961	-0.361786	-0.270753	-0.2545	-0.0901239	-0.298538	-0.251723	-0.347122	-0.290232	-0.296383	-0.305904	-0.33714	-0.288698	-0.287142	-0.257479	-0.346747	-0.266897	-0.282933	-0.255193
527	-0.300376	-0.29155	-0.276295	-0.348934	-0.269266	-0.311678	-0.324961	-0.304512	-0.277978	-0.281534	-0.27562	-0.26232	-0.317014	-0.34042	-0.304002	-0.338269	-0.300631	-0.282113	-0.2715	-0.324627	-0.274955	-0.286419	-0.342511	-0.30213	-0.275002	-0.301869	-0.316659	-0.299965	-0.319961	-0.253318	-0.248028	-0.361786	-0.268185	-0.251247	-0.158062	-0.284139	-0.254354	-0.347122	-0.302802	-0.296383	-0.316586	-0.33714	-0.306275	-0.269776	-0.259237	-0.346747	-0.262821	-0.283778	-0.257451
529	-0.291035	-0.289424	-0.273608	-0.348934	-0.270715	-0.311678	-0.324961	-0.295641	-0.27863	-0.281284	-0.274481	-0.260224	-0.317014	-0.34042	-0.304002	-0.338269	-0.300631	-0.284608	-0.271132	-0.324627	-0.277185	-0.280628	-0.342511	-0.295189	-0.27508	-0.301869	-0.316659	-0.292355	-0.319961	-0.261615	-0.256116	-0.361786	-0.270593	-0.25288	-0.197723	-0.28262	-0.253092	-0.347122	-0.303061	-0.296383	-0.316806	-0.33714	-0.297469	-0.273302	-0.269777	-0.346747	-0.261078	-0.280208	-0.257516
531	-0.276227	-0.286386	-0.272585	-0.348934	-0.272579	-0.311678	-0.324961	-0.284286	-0.278587	-0.286362	-0.272437	-0.255806	-0.317014	-0.34042	-0.304002	-0.338269	-0.300631	-0.286578	-0.270689	-0.324627	-0.281113	-0.270412	-0.342511	-0.286556	-0.274994	-0.301869	-0.316389	-0.27996	-0.319961	-0.271636	-0.260665	-0.361786	-0.274401	-0.254477	-0.232595	-0.282565	-0.252155	-0.347122	-0.301016	-0.294297	-0.316806	-0.33714	-0.288494	-0.280542	-0.276805	-0.346747	-0.263423	-0.277971	-0.257619
533	-0.277064	-0.287698	-0.269407	-0.348934	-0.270192	-0.311678	-0.324961	-0.283595	-0.28867	-0.298192	-0.278224	-0.254937	-0.317014	-0.34042	-0.304002	-0.338269	-0.300631	-0.285999	-0.26929	-0.324627	-0.278027	-0.271627	-0.342511	-0.295666	-0.29261	-0.301869	-0.306114	-0.278762	-0.319961	-0.276872	-0.261087	-0.361786	-0.272495	-0.255642	-0.25444	-0.286215	-0.252482	-0.347122	-0.292619	-0.28573	-0.316806	-0.33714	-0.280716	-0.297957	-0.272356	-0.346747	-0.278317	-0.280167	-0.257983
535	-0.281837	-0.288327	-0.267445	-0.348934	-0.268364	-0.311678	-0.324961	-0.286685	-0.295825	-0.306587	-0.281436	-0.255087	-0.317014	-0.34042	-0.304002	-0.338269	-0.300631	-0.285247	-0.268198	-0.324627	-0.276501	-0.273685	-0.342511	-0.30213	-0.305051	-0.301869	-0.298607	-0.277974	-0.319961	-0.28125	-0.264487	-0.361786	-0.271769	-0.256163	-0.268739	-0.28795	-0.253313	-0.339432	-0.288037	-0.280552	-0.311354	-0.330374	-0.276967	-0.312172	-0.269631	-0.346747	-0.285537	-0.282381	-0.258077
537	-0.296229	-0.287286	-0.268453	-0.348934	-0.267903	-0.311678	-0.324961	-0.299018	-0.295825	-0.306587	-0.27836	-0.257722	-0.317014	-0.34042	-0.304002	-0.338269	-0.300631	-0.284075	-0.267856	-0.324627	-0.27879	-0.277802	-0.342511	-0.30213	-0.304849	-0.301869	-0.297861	-0.278187	-0.319961	-0.28353	-0.275164	-0.361786	-0.273928	-0.256058	-0.275722	-0.287827	-0.254633	-0.324285	-0.287156	-0.278662	-0.300615	-0.317045	-0.277128	-0.323286	-0.268576	-0.346747	-0.285314	-0.284613	-0.257908
539	-0.302639	-0.28525	-0.269583	-0.348934	-0.268431	-0.311678	-0.324961	-0.304512	-0.291155	-0.306587	-0.276541	-0.260201	-0.317014	-0.34042	-0.304002	-0.338269	-0.300631	-0.285041	-0.268849	-0.324627	-0.280185	-0.283016	-0.342511	-0.30213	-0.303869	-0.301869	-0.30364	-0.277988	-0.319961	-0.283665	-0.281481	-0.361786	-0.275682	-0.256348	-0.28546	-0.287935	-0.259762	-0.332518	-0.28732	-0.280204	-0.306452	-0.313987	-0.281968	-0.316139	-0.269312	-0.346747	-0.278604	-0.285598	-0.259975
541	-0.302639	-0.282415	-0.27081	-0.348934	-0.269753	-0.311678	-0.324961	-0.304512	-0.282734	-0.306587	-0.275731	-0.262554	-0.317014	-0.34042	-0.304002	-0.338269	-0.300631	-0.287723	-0.270915	-0.324627	-0.280864	-0.289111	-0.342511	-0.30213	-0.302264	-0.301869	-0.314661	-0.277458	-0.319961	-0.282077	-0.284296	-0.361786	-0.277112	-0.256997	-0.295634	-0.288533	-0.265766	-0.347122	-0.288092	-0.282953	-0.316806	-0.314446	-0.288052	-0.304029	-0.270523	-0.346747	-0.27039	-0.286204	-0.262845
543	-0.302639	-0.283295	-0.272159	-0.348934	-0.270935	-0.311678	-0.324961	-0.29321	-0.288103	-0.306587	-0.277125	-0.272265	-0.317014	-0.328425	-0.304002	-0.338269	-0.300631	-0.297866	-0.274094	-0.324627	-0.279529	-0.290128	-0.342511	-0.30213	-0.302475	-0.301869	-0.316659	-0.27951	-0.319961	-0.283519	-0.292236	-0.361786	-0.277054	-0.264154	-0.295634	-0.300477	-0.264986	-0.347122	-0.296897	-0.290853	-0.316806	-0.327796	-0.29041	-0.303656	-0.270273	-0.346747	-0.273287	-0.286525	-0.269571
545	-0.302639	-0.285173	-0.273478	-0.348934	-0.272119	-0.311678	-0.324961	-0.281696	-0.295825	-0.306587	-0.27908	-0.282675	-0.317014	-0.316205	-0.304002	-0.338269	-0.300631	-0.307651	-0.277716	-0.324627	-0.277997	-0.290044	-0.342511	-0.30213	-0.30216	-0.301869	-0.315639	-0.282052	-0.319961	-0.286435	-0.299751	-0.361786	-0.277357	-0.270285	-0.295634	-0.308838	-0.265505	-0.347122	-0.303061	-0.296383	-0.316806	-0.33714	-0.294579	-0.303243	-0.272325	-0.346747	-0.280464	-0.288654	-0.27455
547	-0.302639	-0.288989	-0.274154	-0.348934	-0.273665	-0.311678	-0.324961	-0.2955	-0.295825	-0.306587	-0.281835	-0.282808	-0.317014	-0.330856	-0.304002	-0.338269	-0.300631	-0.295235	-0.283513	-0.324627	-0.279208	-0.290213	-0.342511	-0.30213	-0.291604	-0.301869	-0.303356	-0.283697	-0.319961	-0.298238	-0.290025	-0.361786	-0.285279	-0.274023	-0.295634	-0.308838	-0.269054	-0.347122	-0.303061	-0.296383	-0.316806	-0.33714	-0.302977	-0.302738	-0.279752	-0.346747	-0.297629	-0.295003	-0.275457
549	-0.302639	-0.291028	-0.277392	-0.348934	-0.277852	-0.311678	-0.324961	-0.304512	-0.295825	-0.306587	-0.287214	-0.28247	-0.317014	-0.34042	-0.304002	-0.338269	-0.300631	-0.29144	-0.289476	-0.324627	-0.28043	-0.290524	-0.342511	-0.30213	-0.288621	-0.301869	-0.299601	-0.285285	-0.319961	-0.305943	-0.283717	-0.361786	-0.287154	-0.28091	-0.295634	-0.308838	-0.273542	-0.347122	-0.303061	-0.296383	-0.316806	-0.33714	-0.306637	-0.310091	-0.283089	-0.346747	-0.30511	-0.294022	-0.275809
551	-0.302639	-0.289726	-0.285448	-0.348934	-0.287004	-0.311678	-0.324961	-0.304512	-0.295825	-0.306587	-0.297527	-0.281246	-0.317014	-0.34042	-0.304002	-0.338269	-0.300631	-0.303856	-0.295752	-0.324627	-0.281674	-0.291105	-0.342511	-0.30213	-0.299876	-0.301869	-0.311885	-0.286765	-0.319961	-0.305943	-0.283836	-0.361786	-0.277656	-0.29023	-0.295634	-0.308838	-0.278755	-0.347122	-0.303061	-0.296383	-0.316806	-0.33714	-0.306637	-0.323516	-0.283266	-0.346747	-0.30511	-0.287375	-0.275734
553	-0.302639	-0.288551	-0.288579	-0.348934	-0.285132	-0.311678	-0.324961	-0.304512	-0.295825	-0.306587	-0.301535	-0.280845	-0.317014	-0.34042	-0.304002	-0.338269	-0.300631	-0.308681	-0.298191	-0.324627	-0.287673	-0.291573	-0.342511	-0.30213	-0.304344	-0.301869	-0.316659	-0.292514	-0.319961	-0.305943	-0.289755	-0.361786	-0.279771	-0.289533	-0.295634	-0.308838	-0.275605	-0.347122	-0.303061	-0.296383	-0.316806	-0.33714	-0.306637	-0.325822	-0.283486	-0.346747	-0.30511	-0.286103	-0.27589
555	-0.302639	-0.287456	-0.288579	-0.348934	-0.276251	-0.311678	-0.324961	-0.304512	-0.295825	-0.306587	-0.301535	-0.280966	-0.317014	-0.34042	-0.304002	-0.338269	-0.300631	-0.308681	-0.298191	-0.324627	-0.296694	-0.291968	-0.342511	-0.30213	-0.304496	-0.301869	-0.316659	-0.300977	-0.319961	-0.305943	-0.299362	-0.361786	-0.289269	-0.287134	-0.295634	-0.308838	-0.271157	-0.347122	-0.303061	-0.296383	-0.316806	-0.33714	-0.306637	-0.325822	-0.2843	-0.346747	-0.30511	-0.286589	-0.276129
557	-0.302639	-0.287624	-0.288579	-0.348934	-0.282921	-0.311678	-0.324961	-0.304512	-0.295825	-0.306587	-0.301535	-0.281804	-0.317014	-0.34042	-0.304002	-0.338269	-0.291356	-0.298369	-0.298191	-0.324627	-0.297817	-0.293288	-0.342511	-0.30213	-0.307398	-0.301869	-0.316659	-0.30203	-0.319961	-0.305943	-0.300558	-0.361786	-0.290451	-0.288428	-0.295634	-0.308838	-0.270996	-0.347122	-0.303061	-0.296383	-0.316806	-0.33714	-0.306637	-0.325822	-0.290872	-0.346747	-0.30511	-0.293393	-0.276701
559	-0.302639	-0.289215	-0.288579	-0.348934	-0.290561	-0.311678	-0.324961	-0.304512	-0.295825	-0.306587	-0.301535	-0.283688	-0.317014	-0.34042	-0.304002	-0.338269	-0.282615	-0.289883	-0.298191	-0.324627	-0.296823	-0.295258	-0.342511	-0.30213	-0.311484	-0.301869	-0.316659	-0.300761	-0.319961	-0.305943	-0.300558	-0.361786	-0.289469	-0.291819	-0.295634	-0.308838	-0.27269	-0.347122	-0.303061	-0.296383	-0.316806	-0.33714	-0.30403	-0.32154	-0.295102	-0.346747	-0.30511	-0.297771	-0.27696
561	-0.302639	-0.298455	-0.288579	-0.348934	-0.290561	-0.311678	-0.324961	-0.304512	-0.295825	-0.306587	-0.301535	-0.291389	-0.317014	-0.34042	-0.304002	-0.338269	-0.285271	-0.301661	-0.298191	-0.324627	-0.289706	-0.300416	-0.342511	-0.30213	-0.320444	-0.301869	-0.316659	-0.291677	-0.319961	-0.305943	-0.300558	-0.361786	-0.282438	-0.298999	-0.295634	-0.308838	-0.277736	-0.347122	-0.303061	-0.296383	-0.316806	-0.33714	-0.296716	-0.309525	-0.295102	-0.346747	-0.30511	-0.297771	-0.276655
563	-0.302639	-0.303963	-0.288579	-0.348934	-0.290561	-0.306727	-0.324961	-0.304512	-0.295825	-0.306587	-0.301535	-0.29219	-0.317014	-0.34042	-0.304002	-0.338269	-0.286875	-0.308681	-0.295505	-0.324627	-0.288339	-0.303491	-0.342511	-0.30213	-0.325785	-0.301869	-0.316659	-0.289932	-0.319961	-0.305943	-0.300558	-0.361786	-0.277459	-0.301724	-0.295634	-0.302725	-0.27965	-0.347122	-0.303061	-0.296383	-0.316806	-0.33714	-0.29848	-0.312422	-0.295102	-0.346747	-0.300888	-0.297771	-0.276664
565	-0.302639	-0.303963	-0.288579	-0.348934	-0.290561	-0.29447	-0.324961	-0.304512	-0.295825	-0.306587	-0.301535	-0.282809	-0.317014	-0.34042	-0.304002	-0.338269	-0.286923	-0.308681	-0.288855	-0.324627	-0.295455	-0.303491	-0.342511	-0.30213	-0.325785	-0.301869	-0.316659	-0.299015	-0.319961	-0.305943	-0.300558	-0.361786	-0.275506	-0.301724	-0.295634	-0.292876	-0.27965	-0.347122	-0.303061	-0.296383	-0.316806	-0.33714	-0.305794	-0.324437	-0.295102	-0.346747	-0.294083	-0.297771	-0.276866
567	-0.302639	-0.299128	-0.288579	-0.348934	-0.290561	-0.298591	-0.314368	-0.304512	-0.295825	-0.306587	-0.301535	-0.285963	-0.317014	-0.34042	-0.304002	-0.338269	-0.284736	-0.308681	-0.287318	-0.324627	-0.293223	-0.299792	-0.342511	-0.30213	-0.318977	-0.301869	-0.316659	-0.30203	-0.319961	-0.305943	-0.300558	-0.361786	-0.275548	-0.301724	-0.295634	-0.300454	-0.27965	-0.347122	-0.303061	-0.288945	-0.316806	-0.33714	-0.299724	-0.325822	-0.295102	-0.346747	-0.299318	-0.297771	-0.2765
569	-0.302639	-0.29189	-0.288579	-0.348934	-0.290561	-0.310848	-0.298513	-0.304512	-0.295825	-0.306587	-0.301535	-0.295344	-0.317014	-0.34042	-0.304002	-0.338269	-0.281437	-0.308681	-0.288322	-0.324627	-0.286345	-0.294257	-0.342511	-0.30213	-0.308787	-0.301869	-0.316659	-0.30203	-0.319961	-0.305943	-0.300558	-0.361786	-0.276581	-0.301724	-0.295634	-0.308838	-0.27965	-0.347122	-0.303061	-0.283039	-0.316806	-0.33714	-0.293268	-0.325822	-0.295102	-0.346747	-0.30511	-0.296815	-0.276125
571	-0.302639	-0.289799	-0.288579	-0.348934	-0.290561	-0.311678	-0.312221	-0.293301	-0.295825	-0.306587	-0.301535	-0.295979	-0.301838	-0.34042	-0.304002	-0.338269	-0.291643	-0.308681	-0.288673	-0.313327	-0.285941	-0.294293	-0.342511	-0.30213	-0.317598	-0.301869	-0.306782	-0.30203	-0.319961	-0.305943	-0.300558	-0.361786	-0.284063	-0.301724	-0.295634	-0.308838	-0.27965	-0.347122	-0.303061	-0.291447	-0.316806	-0.33714	-0.294586	-0.325822	-0.295102	-0.346747	-0.30511	-0.29039	-0.276112
573	-0.302639	-0.288601	-0.288579	-0.34557	-0.290561	-0.311678	-0.324961	-0.286002	-0.295825	-0.306587	-0.301535	-0.295979	-0.289473	-0.34042	-0.304002	-0.338269	-0.300631	-0.308681	-0.288971	-0.30359	-0.286143	-0.294656	-0.338745	-0.30213	-0.325785	-0.301869	-0.300351	-0.30203	-0.319961	-0.305943	-0.300558	-0.361786	-0.290451	-0.301724	-0.295634	-0.308838	-0.27965	-0.347122	-0.303061	-0.296383	-0.316806	-0.33714	-0.298042	-0.325822	-0.295102	-0.346747	-0.30511	-0.286569	-0.278082
575	-0.302639	-0.289529	-0.288579	-0.32845	-0.290561	-0.311678	-0.324961	-0.298027	-0.295825	-0.306587	-0.301535	-0.295979	-0.293105	-0.34042	-0.304002	-0.338269	-0.300631	-0.308681	-0.289244	-0.303599	-0.286907	-0.294702	-0.319581	-0.30213	-0.325785	-0.301869	-0.310945	-0.30203	-0.319961	-0.305943	-0.300558	-0.361786	-0.290451	-0.301724	-0.295634	-0.308838	-0.27965	-0.347122	-0.303061	-0.296383	-0.316806	-0.33714	-0.304539	-0.325822	-0.295102	-0.346747	-0.30511	-0.286449	-0.28287
577	-0.302639	-0.293727	-0.288579	-0.327103	-0.290561	-0.311678	-0.324961	-0.304512	-0.295825	-0.306587	-0.301535	-0.295979	-0.30089	-0.34042	-0.304002	-0.338269	-0.300631	-0.308681	-0.289706	-0.309183	-0.290105	-0.294508	-0.309913	-0.30213	-0.325785	-0.301869	-0.316659	-0.30203	-0.319961	-0.305943	-0.300558	-0.361786	-0.290451	-0.301724	-0.295634	-0.308838	-0.27965	-0.347122	-0.303061	-0.296383	-0.316806	-0.33714	-0.306637	-0.325822	-0.295102	-0.346747	-0.30511	-0.290842	-0.284416
579	-0.302639	-0.301754	-0.288579	-0.344224	-0.290561	-0.311678	-0.324961	-0.304512	-0.295825	-0.306587	-0.301535	-0.295979	-0.313535	-0.34042	-0.304002	-0.338269	-0.300631	-0.308681	-0.29039	-0.321295	-0.296153	-0.294033	-0.311361	-0.30213	-0.325785	-0.301869	-0.316659	-0.30203	-0.319961	-0.305943	-0.300558	-0.361786	-0.290451	-0.301724	-0.295634	-0.308838	-0.27965	-0.347122	-0.303061	-0.296383	-0.316806	-0.33714	-0.306637	-0.325822	-0.295102	-0.346747	-0.30511	-0.297386	-0.284416
581	-0.302639	-0.303963	-0.288579	-0.348934	-0.290561	-0.311678	-0.324961	-0.304512	-0.295825	-0.306587	-0.301535	-0.295979	-0.317014	-0.34042	-0.304002	-0.338269	-0.300631	-0.308681	-0.28939	-0.324627	-0.297817	-0.294368	-0.311906	-0.30213	-0.325785	-0.301869	-0.316659	-0.30203	-0.319961	-0.305943	-0.300558	-0.361786	-0.290451	-0.301724	-0.295634	-0.308838	-0.27965	-0.347122	-0.303061	-0.296383	-0.316806	-0.33714	-0.306637	-0.325822	-0.295102	-0.346747	-0.30511	-0.297771	-0.284416
583	-0.302639	-0.303963	-0.288579	-0.348934	-0.290561	-0.311678	-0.324961	-0.304512	-0.295825	-0.306587	-0.301535	-0.295979	-0.317014	-0.34042	-0.304002	-0.338269	-0.300631	-0.308681	-0.28775	-0.324627	-0.297817	-0.295011	-0.312108	-0.30213	-0.325785	-0.301869	-0.316659	-0.30203	-0.319961	-0.305943	-0.300558	-0.361786	-0.290451	-0.301724	-0.295634	-0.308838	-0.27965	-0.347122	-0.303061	-0.296383	-0.316806	-0.33714	-0.306637	-0.325822	-0.295102	-0.346747	-0.30511	-0.297771	-0.284416
585	-0.302639	-0.303963	-0.288579	-0.348934	-0.290561	-0.311678	-0.324961	-0.304512	-0.295825	-0.306587	-0.301535	-0.295979	-0.317014	-0.34042	-0.304002	-0.338269	-0.300631	-0.308681	-0.293692	-0.324627	-0.291142	-0.294892	-0.329433	-0.30213	-0.325785	-0.301869	-0.316659	-0.30203	-0.319961	-0.305943	-0.300558	-0.361786	-0.290451	-0.301724	-0.295634	-0.308838	-0.27965	-0.347122	-0.303061	-0.296383	-0.316806	-0.33714	-0.306637	-0.325822	-0.295102	-0.346747	-0.30511	-0.297771	-0.284416
587	-0.302639	-0.303963	-0.288579	-0.348934	-0.290561	-0.311678	-0.324961	-0.304512	-0.295825	-0.306587	-0.301535	-0.295979	-0.317014	-0.34042	-0.304002	-0.338269	-0.300631	-0.308681	-0.298191	-0.324627	-0.287812	-0.296065	-0.342511	-0.30213	-0.325785	-0.301869	-0.316659	-0.30203	-0.319961	-0.305943	-0.300558	-0.361786	-0.290451	-0.301724	-0.295634	-0.308838	-0.27965	-0.347122	-0.303061	-0.296383	-0.316806	-0.33714	-0.306637	-0.325822	-0.295102	-0.346747	-0.30511	-0.297771	-0.284416
589	-0.302639	-0.303963	-0.288579	-0.348934	-0.290561	-0.311678	-0.324961	-0.304512	-0.295825	-0.306587	-0.301535	-0.295979	-0.317014	-0.34042	-0.304002	-0.338269	-0.300631	-0.308681	-0.298191	-0.324627	-0.294561	-0.301074	-0.342511	-0.30213	-0.325785	-0.301869	-0.316659	-0.30203	-0.319961	-0.305943	-0.300558	-0.361786	-0.290451	-0.301724	-0.295634	-0.308838	-0.27965	-0.347122	-0.303061	-0.296383	-0.316806	-0.33714	-0.306637	-0.325822	-0.295102	-0.346747	-0.30511	-0.297771	-0.284416
591	-0.302639	-0.303963	-0.288579	-0.348934	-0.290561	-0.311678	-0.324961	-0.304512	-0.295825	-0.306587	-0.301535	-0.295979	-0.317014	-0.34042	-0.304002	-0.338269	-0.300631	-0.308681	-0.298191	-0.324627	-0.297817	-0.303491	-0.342511	-0.30213	-0.325785	-0.301869	-0.316659	-0.30203	-0.319961	-0.305943	-0.300558	-0.361786	-0.290451	-0.301724	-0.295634	-0.308838	-0.27965	-0.347122	-0.303061	-0.296383	-0.316806	-0.33714	-0.306637	-0.325822	-0.295102	-0.346747	-0.30511	-0.297771	-0.284416
593	-0.302639	-0.303963	-0.288579	-0.348934	-0.290561	-0.311678	-0.324961	-0.304512	-0.295825	-0.306587	-0.301535	-0.295979	-0.317014	-0.34042	-0.304002	-0.338269	-0.300631	-0.308681	-0.298191	-0.324627	-0.297817	-0.303491	-0.342511	-0.30213	-0.325785	-0.301869	-0.316659	-0.30203	-0.319961	-0.305943	-0.300558	-0.361786	-0.290451	-0.301724	-0.295634	-0.308838	-0.27965	-0.347122	-0.303061	-0.296383	-0.316806	-0.33714	-0.306637	-0.325822	-0.295102	-0.346747	-0.30511	-0.297771	-0.284416
595	-0.302639	-0.303963	-0.288579	-0.348934	-0.290561	-0.311678	-0.324961	-0.304512	-0.295825	-0.306587	-0.301535	-0.295979	-0.317014	-0.34042	-0.304002	-0.338269	-0.300631	-0.308681	-0.294551	-0.324627	-0.297817	-0.303491	-0.342511	-0.30213	-0.325785	-0.301869	-0.316659	-0.30203	-0.319961	-0.305943	-0.300558	-0.361786	-0.290451	-0.301724	-0.295634	-0.308838	-0.27965	-0.347122	-0.303061	-0.296383	-0.316806	-0.33714	-0.306637	-0.325822	-0.295102	-0.346747	-0.30511	-0.297771	-0.284416
597	-0.302639	-0.303963	-0.288579	-0.348934	-0.290561	-0.311678	-0.324961	-0.304512	-0.295825	-0.306587	-0.301535	-0.295979	-0.317014	-0.34042	-0.304002	-0.338269	-0.300631	-0.308681	-0.29032	-0.324627	-0.297817	-0.303491	-0.342511	-0.30213	-0.325785	-0.301869	-0.316659	-0.30203	-0.319961	-0.305943	-0.300558	-0.361786	-0.290451	-0.301724	-0.295634	-0.308838	-0.27965	-0.347122	-0.303061	-0.296383	-0.316806	-0.33714	-0.306637	-0.325822	-0.295102	-0.346747	-0.30511	-0.297771	-0.284416
599	-0.302639	-0.303963	-0.288579	-0.348934	-0.290561	-0.311678	-0.324961	-0.304512	-0.295825	-0.306587	-0.301535	-0.295979	-0.317014	-0.34042	-0.304002	-0.338269	-0.300631	-0.308681	-0.294977	-0.324627	-0.297817	-0.303491	-0.342511	-0.30213	-0.325785	-0.301869	-0.316659	-0.30203	-0.319961	-0.305943	-0.300558	-0.361786	-0.290451	-0.301724	-0.295634	-0.308838	-0.27965	-0.347122	-0.303061	-0.296383	-0.316806	-0.33714	-0.306637	-0.325822	-0.295102	-0.346747	-0.30511	-0.297771	-0.284416
601	-0.302639	-0.303963	-0.288579	-0.348934	-0.290561	-0.311678	-0.324961	-0.304512	-0.295825	-0.306587	-0.301535	-0.295979	-0.317014	-0.34042	-0.304002	-0.338269	-0.300631	-0.308681	-0.298191	-0.324627	-0.297817	-0.303491	-0.342511	-0.30213	-0.325785	-0.301869	-0.316659	-0.30203	-0.319961	-0.305943	-0.300558	-0.361786	-0.290451	-0.301724	-0.295634	-0.308838	-0.27965	-0.347122	-0.303061	-0.296383	-0.316806	-0.33714	-0.306637	-0.325822	-0.295102	-0.346747	-0.30511	-0.297771	-0.284416
603	-0.302639	-0.303963	-0.288579	-0.348934	-0.290561	-0.311678	-0.324961	-0.304512	-0.295825	-0.306587	-0.301535	-0.295979	-0.317014	-0.34042	-0.304002	-0.338269	-0.300631	-0.308681	-0.298191	-0.324627	-0.297817	-0.303491	-0.342511	-0.30213	-0.325785	-0.301869	-0.316659	-0.30203	-0.319961	-0.305943	-0.300558	-0.361786	-0.290451	-0.301724	-0.295634	-0.308838	-0.27965	-0.347122	-0.303061	-0.296383	-0.316806	-0.33714	-0.306637	-0.325822	-0.295102	-0.346747	-0.30511	-0.297771	-0.284416
605	-0.302639	-0.303963	-0.288579	-0.348934	-0.290561	-0.311678	-0.324961	-0.304512	-0.295825	-0.306587	-0.301535	-0.295979	-0.317014	-0.34042	-0.304002	-0.338269	-0.300631	-0.308681	-0.298191	-0.324627	-0.297817	-0.303491	-0.342511	-0.30213	-0.325785	-0.301869	-0.316659	-0.30203	-0.319961	-0.305943	-0.300558	-0.361786	-0.290451	-0.301724	-0.295634	-0.308838	-0.27965	-0.347122	-0.303061	-0.296383	-0.316806	-0.33714	-0.306637	-0.325822	-0.295102	-0.346747	-0.30511	-0.297771	-0.284416
607	-0.302639	-0.303963	-0.288579	-0.348934	-0.290561	-0.311678	-0.324961	-0.304512	-0.295825	-0.306587	-0.301535	-0.295979	-0.317014	-0.34042	-0.304002	-0.338269	-0.300631	-0.308681	-0.298191	-0.324627	-0.297817	-0.303491	-0.342511	-0.30213	-0.325785	-0.301869	-0.316659	-0.30203	-0.319961	-0.305943	-0.300558	-0.361786	-0.290451	-0.301724	-0.295634	-0.308838	-0.27965	-0.347122	-0.303061	-0.296383	-0.316806	-0.33714	-0.306637	-0.325822	-0.295102	-0.346747	-0.30511	-0.297771	-0.284416
609	-0.302639	-0.303963	-0.288579	-0.348934	-0.290561	-0.311678	-0.324961	-0.304512	-0.295825	-0.306587	-0.301535	-0.295979	-0.317014	-0.34042	-0.304002	-0.338269	-0.300631	-0.308681	-0.298191	-0.324627	-0.297817	-0.303491	-0.342511	-0.30213	-0.325785	-0.301869	-0.316659	-0.30203	-0.319961	-0.305943	-0.300558	-0.361786	-0.290451	-0.301724	-0.295634	-0.308838	-0.27965	-0.347122	-0.303061	-0.296383	-0.316806	-0.33714	-0.306637	-0.325822	-0.295102	-0.346747	-0.30511	-0.297771	-0.284416
611	-0.302639	-0.303963	-0.288579	-0.348934	-0.290561	-0.311678	-0.324961	-0.304512	-0.295825	-0.306587	-0.301535	-0.295979	-0.317014	-0.34042	-0.304002	-0.338269	-0.300631	-0.308681	-0.298191	-0.324627	-0.297817	-0.303491	-0.342511	-0.30213	-0.325785	-0.301869	-0.316659	-0.30203	-0.319961	-0.305943	-0.300558	-0.361786	-0.290451	-0.301724	-0.295634	-0.308838	-0.27965	-0.347122	-0.303061	-0.296383	-0.316806	-0.33714	-0.306637	-0.325822	-0.295102	-0.346747	-0.30511	-0.297771	-0.284416
613	-0.302639	-0.303963	-0.288579	-0.348934	-0.290561	-0.311678	-0.324961	-0.304512	-0.295825	-0.306587	-0.301535	-0.295979	-0.317014	-0.34042	-0.304002	-0.338269	-0.300631	-0.308681	-0.298191	-0.324627	-0.297817	-0.303491	-0.342511	-0.30213	-0.325785	-0.301869	-0.316659	-0.30203	-0.319961	-0.305943	-0.300558	-0.361786	-0.290451	-0.301724	-0.295634	-0.308838	-0.27965	-0.347122	-0.303061	-0.296383	-0.316806	-0.33714	-0.306637	-0.325822	-0.295102	-0.346747	-0.30511	-0.297771	-0.284416
615	-0.302639	-0.303963	-0.288579	-0.348934	-0.290561	-0.311678	-0.324961	-0.304512	-0.295825	-0.306587	-0.301535	-0.295979	-0.317014	-0.34042	-0.304002	-0.338269	-0.300631	-0.308681	-0.298191	-0.324627	-0.297817	-0.303491	-0.342511	-0.30213	-0.325785	-0.301869	-0.316659	-0.30203	-0.319961	-0.305943	-0.300558	-0.361786	-0.290451	-0.301724	-0.295634	-0.308838	-0.27965	-0.347122	-0.303061	-0.296383	-0.316806	-0.33714	-0.306637	-0.325822	-0.295102	-0.346747	-0.30511	-0.297771	-0.284416
617	-0.302639	-0.303963	-0.288579	-0.348934	-0.290561	-0.311678	-0.324961	-0.304512	-0.295825	-0.306587	-0.301535	-0.295979	-0.317014	-0.34042	-0.304002	-0.338269	-0.300631	-0.308681	-0.298191	-0.324627	-0.297817	-0.303491	-0.342511	-0.30213	-0.325785	-0.301869	-0.316659	-0.30203	-0.319961	-0.305943	-0.300558	-0.361786	-0.290451	-0.301724	-0.295634	-0.308838	-0.27965	-0.347122	-0.303061	-0.296383	-0.316806	-0.33714	-0.306637	-0.325822	-0.295102	-0.346747	-0.30511	-0.297771	-0.284416
619	-0.302639	-0.303963	-0.288579	-0.348934	-0.290561	-0.311678	-0.324961	-0.304512	-0.295825	-0.299661	-0.301535	-0.295979	-0.317014	-0.34042	-0.304002	-0.338269	-0.300631	-0.308681	-0.298191	-0.324627	-0.297817	-0.303491	-0.342511	-0.30213	-0.325785	-0.301869	-0.316659	-0.30203	-0.319961	-0.305943	-0.300558	-0.361786	-0.290451	-0.301724	-0.295634	-0.308838	-0.27965	-0.347122	-0.303061	-0.296383	-0.316806	-0.33714	-0.306637	-0.325822	-0.295102	-0.346747	-0.30511	-0.297771	-0.284416
621	-0.302639	-0.303963	-0.288579	-0.348934	-0.290561	-0.311678	-0.324961	-0.304512	-0.295825	-0.288685	-0.301535	-0.295979	-0.317014	-0.34042	-0.304002	-0.338269	-0.300631	-0.308681	-0.298191	-0.324627	-0.297817	-0.303491	-0.342511	-0.30213	-0.325785	-0.301869	-0.316659	-0.30203	-0.319961	-0.305943	-0.300558	-0.361786	-0.290451	-0.301724	-0.295634	-0.308838	-0.27965	-0.347122	-0.303061	-0.296383	-0.316806	-0.33714	-0.306637	-0.325822	-0.295102	-0.346747	-0.30511	-0.297771	-0.284416
623	-0.302639	-0.303963	-0.288579	-0.348934	-0.290561	-0.311678	-0.324961	-0.304512	-0.295825	-0.29736	-0.301535	-0.295979	-0.317014	-0.34042	-0.304002	-0.338269	-0.300631	-0.308681	-0.298191	-0.324627	-0.297817	-0.303491	-0.342511	-0.30213	-0.325785	-0.301869	-0.316659	-0.30203	-0.319961	-0.305943	-0.300558	-0.361786	-0.290451	-0.301724	-0.295634	-0.308838	-0.27965	-0.347122	-0.303061	-0.296383	-0.316806	-0.33714	-0.306637	-0.325822	-0.295102	-0.346747	-0.30511	-0.297771	-0.284416
625	-0.302639	-0.303963	-0.288579	-0.348934	-0.290561	-0.311678	-0.324961	-0.304512	-0.295825	-0.306587	-0.301535	-0.295979	-0.317014	-0.34042	-0.304002	-0.338269	-0.300631	-0.308681	-0.298191	-0.324627	-0.297817	-0.303491	-0.342511	-0.30213	-0.325785	-0.301869	-0.316659	-0.30203	-0.319961	-0.305943	-0.300558	-0.361786	-0.290451	-0.301724	-0.295634	-0.308838	-0.27965	-0.347122	-0.303061	-0.296383	-0.316806	-0.33714	-0.306637	-0.325822	-0.295102	-0.346747	-0.30511	-0.297771	-0.284416
627	-0.302639	-0.303963	-0.288579	-0.348934	-0.290561	-0.311678	-0.324961	-0.304512	-0.295825	-0.306587	-0.301535	-0.295979	-0.317014	-0.34042	-0.304002	-0.338269	-0.300631	-0.308681	-0.298191	-0.324627	-0.297817	-0.303491	-0.342511	-0.30213	-0.325785	-0.301869	-0.316659	-0.30203	-0.319961	-0.305943	-0.300558	-0.361786	-0.290451	-0.301724	-0.295634	-0.308838	-0.27965	-0.347122	-0.303061	-0.296383	-0.316806	-0.33714	-0.306637	-0.325822	-0.295102	-0.346747	-0.30511	-0.297771	-0.284416
629	-0.302639	-0.303963	-0.288579	-0.348934	-0.290561	-0.311678	-0.324961	-0.304512	-0.295825	-0.306587	-0.301535	-0.295979	-0.317014	-0.34042	-0.304002	-0.338269	-0.300631	-0.308681	-0.298191	-0.324627	-0.297817	-0.303491	-0.342511	-0.30213	-0.325785	-0.301869	-0.316659	-0.30203	-0.319961	-0.305943	-0.300558	-0.361786	-0.290451	-0.301724	-0.295634	-0.308838	-0.27965	-0.347122	-0.303061	-0.296383	-0.316806	-0.33714	-0.306637	-0.325822	-0.295102	-0.346747	-0.30511	-0.297771	-0.284416
631	-0.302639	-0.303963	-0.288579	-0.348934	-0.290561	-0.311678	-0.324961	-0.304512	-0.295825	-0.306587	-0.301535	-0.295979	-0.317014	-0.34042	-0.304002	-0.338269	-0.300631	-0.308681	-0.298191	-0.324627	-0.297817	-0.303491	-0.342511	-0.30213	-0.325785	-0.301869	-0.316659	-0.30203	-0.319961	-0.305943	-0.300558	-0.361786	-0.290451	-0.301724	-0.295634	-0.308838	-0.27965	-0.347122	-0.303061	-0.296383	-0.316806	-0.33714	-0.306637	-0.325822	-0.295102	-0.346747	-0.30511	-0.297771	-0.284416
633	-0.302639	-0.303963	-0.288579	-0.348934	-0.290561	-0.311678	-0.324961	-0.304512	-0.295825	-0.306587	-0.301535	-0.295979	-0.317014	-0.34042	-0.304002	-0.338269	-0.300631	-0.308681	-0.298191	-0.324627	-0.297817	-0.303491	-0.342511	-0.30213	-0.325785	-0.301869	-0.316659	-0.30203	-0.319961	-0.305943	-0.300558	-0.361786	-0.290451	-0.301724	-0.295634	-0.308838	-0.27965	-0.347122	-0.303061	-0.296383	-0.316806	-0.33714	-0.306637	-0.325822	-0.295102	-0.346747	-0.30511	-0.297771	-0.284416
635	-0.302639	-0.303963	-0.288579	-0.348934	-0.290561	-0.311678	-0.324961	-0.304512	-0.295825	-0.306587	-0.301535	-0.295979	-0.317014	-0.34042	-0.304002	-0.338269	-0.300631	-0.308681	-0.298191	-0.324627	-0.297817	-0.303491	-0.342511	-0.30213	-0.325785	-0.301869	-0.316659	-0.30203	-0.319961	-0.305943	-0.300558	-0.361786	-0.290451	-0.301724	-0.295634	-0.308838	-0.27965	-0.347122	-0.303061	-0.296383	-0.316806	-0.33714	-0.306637	-0.325822	-0.295102	-0.346747	-0.30511	-0.297771	-0.284416
637	-0.302639	-0.303963	-0.288579	-0.348934	-0.290561	-0.311678	-0.324961	-0.304512	-0.295825	-0.306587	-0.301535	-0.295979	-0.317014	-0.34042	-0.304002	-0.338269	-0.300631	-0.308681	-0.298191	-0.324627	-0.297817	-0.303491	-0.342511	-0.30213	-0.325785	-0.301869	-0.316659	-0.30203	-0.319961	-0.305943	-0.300558	-0.361786	-0.290451	-0.301724	-0.295634	-0.308838	-0.27965	-0.347122	-0.303061	-0.296383	-0.316806	-0.33714	-0.306637	-0.325822	-0.295102	-0.346747	-0.30511	-0.297771	-0.284416
639	-0.302639	-0.303963	-0.288579	-0.348934	-0.290561	-0.311678	-0.324961	-0.304512	-0.295825	-0.306587	-0.301535	-0.295979	-0.317014	-0.34042	-0.304002	-0.338269	-0.300631	-0.308681	-0.298191	-0.324627	-0.297817	-0.303491	-0.342511	-0.30213	-0.325785	-0.301869	-0.316659	-0.30203	-0.319961	-0.305943	-0.300558	-0.361786	-0.290451	-0.301724	-0.295634	-0.308838	-0.27965	-0.347122	-0.303061	-0.296383	-0.316806	-0.33714	-0.306637	-0.325822	-0.295102	-0.346747	-0.30511	-0.297771	-0.284416
641	-0.302639	-0.303963	-0.288579	-0.348934	-0.290561	-0.311678	-0.324961	-0.304512	-0.295825	-0.306587	-0.301535	-0.295979	-0.317014	-0.34042	-0.304002	-0.338269	-0.300631	-0.308681	-0.298191	-0.324627	-0.297817	-0.303491	-0.342511	-0.30213	-0.325785	-0.301869	-0.316659	-0.30203	-0.319961	-0.305943	-0.300558	-0.361786	-0.290451	-0.301724	-0.295634	-0.308838	-0.27965	-0.347122	-0.303061	-0.296383	-0.316806	-0.33714	-0.306637	-0.325822	-0.295102	-0.346747	-0.30511	-0.297771	-0.284416
643	-0.302639	-0.303963	-0.288579	-0.348934	-0.290561	-0.311678	-0.324961	-0.304512	-0.295825	-0.306587	-0.301535	-0.295979	-0.317014	-0.34042	-0.304002	-0.338269	-0.300631	-0.308681	-0.298191	-0.324627	-0.297817	-0.303491	-0.342511	-0.30213	-0.325785	-0.301869	-0.316659	-0.30203	-0.319961	-0.305943	-0.300558	-0.361786	-0.290451	-0.301724	-0.295634	-0.308838	-0.27965	-0.347122	-0.303061	-0.296383	-0.316806	-0.33714	-0.306637	-0.325822	-0.295102	-0.346747	-0.30511	-0.297771	-0.284416
645	-0.302639	-0.303963	-0.288579	-0.348934	-0.290561	-0.311678	-0.324961	-0.304512	-0.295825	-0.306587	-0.301535	-0.295979	-0.317014	-0.34042	-0.304002	-0.338269	-0.300631	-0.308681	-0.298191	-0.324627	-0.297817	-0.303491	-0.342511	-0.30213	-0.325785	-0.301869	-0.316659	-0.30203	-0.319961	-0.305943	-0.300558	-0.361786	-0.290451	-0.301724	-0.295634	-0.308838	-0.27965	-0.347122	-0.303061	-0.296383	-0.316806	-0.33714	-0.306637	-0.325822	-0.295102	-0.346747	-0.30511	-0.297771	-0.284416
647	-0.302639	-0.303963	-0.288579	-0.348934	-0.290561	-0.311678	-0.324961	-0.304512	-0.295825	-0.306587	-0.301535	-0.295979	-0.317014	-0.34042	-0.304002	-0.338269	-0.300631	-0.308681	-0.298191	-0.324627	-0.297817	-0.303491	-0.342511	-0.30213	-0.325785	-0.301869	-0.316659	-0.30203	-0.319961	-0.305943	-0.300558	-0.361786	-0.290451	-0.301724	-0.295634	-0.308838	-0.27965	-0.347122	-0.303061	-0.296383	-0.316806	-0.33714	-0.306637	-0.325822	-0.295102	-0.346747	-0.30511	-0.297771	-0.284416
649	-0.302639	-0.303963	-0.288579	-0.348934	-0.290561	-0.311678	-0.324961	-0.304512	-0.295825	-0.306587	-0.301535	-0.295979	-0.317014	-0.34042	-0.304002	-0.338269	-0.300631	-0.308681	-0.298191	-0.324627	-0.297817	-0.303491	-0.342511	-0.30213	-0.325785	-0.301869	-0.316659	-0.30203	-0.319961	-0.305943	-0.300558	-0.361786	-0.290451	-0.301724	-0.295634	-0.308838	-0.27965	-0.347122	-0.303061	-0.294368	-0.316806	-0.33714	-0.306637	-0.325822	-0.295102	-0.346747	-0.30511	-0.297771	-0.284416
651	-0.302639	-0.303963	-0.288579	-0.348934	-0.290561	-0.311678	-0.324961	-0.304512	-0.295825	-0.306587	-0.301535	-0.295979	-0.317014	-0.34042	-0.304002	-0.338269	-0.300631	-0.308681	-0.298191	-0.324627	-0.297817	-0.303491	-0.342511	-0.30213	-0.325785	-0.301869	-0.316659	-0.30203	-0.319961	-0.305943	-0.300558	-0.361786	-0.290451	-0.301724	-0.295634	-0.308838	-0.27965	-0.347122	-0.303061	-0.285351	-0.316806	-0.33714	-0.306637	-0.325822	-0.295102	-0.346747	-0.30511	-0.297771	-0.284416
653	-0.302639	-0.303963	-0.288579	-0.348934	-0.290561	-0.311678	-0.324961	-0.304512	-0.295825	-0.306587	-0.301535	-0.295979	-0.317014	-0.34042	-0.304002	-0.338269	-0.300631	-0.308681	-0.298191	-0.324627	-0.297817	-0.303491	-0.342511	-0.30213	-0.325785	-0.301869	-0.316659	-0.30203	-0.319961	-0.305943	-0.300558	-0.361786	-0.290451	-0.301724	-0.295634	-0.308838	-0.27965	-0.347122	-0.303061	-0.277556	-0.316806	-0.33714	-0.306637	-0.325822	-0.295102	-0.346747	-0.30511	-0.297771	-0.284416
655	-0.302639	-0.303963	-0.288579	-0.348934	-0.290561	-0.311678	-0.324961	-0.304512	-0.295825	-0.306587	-0.301535	-0.295979	-0.317014	-0.34042	-0.304002	-0.338269	-0.300631	-0.308681	-0.298191	-0.324627	-0.297817	-0.303491	-0.342511	-0.30213	-0.325785	-0.301869	-0.316659	-0.30203	-0.319961	-0.305943	-0.300558	-0.361786	-0.290451	-0.301724	-0.295634	-0.308838	-0.27965	-0.347122	-0.303061	-0.271045	-0.316806	-0.33714	-0.306637	-0.325822	-0.295102	-0.346747	-0.30511	-0.297771	-0.284416
657	-0.302639	-0.303963	-0.288579	-0.348934	-0.290561	-0.311678	-0.324961	-0.304512	-0.295825	-0.306587	-0.301535	-0.295979	-0.317014	-0.34042	-0.304002	-0.338269	-0.300631	-0.308681	-0.298191	-0.324627	-0.297817	-0.303491	-0.342511	-0.30213	-0.325785	-0.301869	-0.316659	-0.30203	-0.319961	-0.305943	-0.300558	-0.361786	-0.290451	-0.301724	-0.295634	-0.308838	-0.27965	-0.347122	-0.303061	-0.271284	-0.316806	-0.33714	-0.306637	-0.325822	-0.295102	-0.346747	-0.30511	-0.297771	-0.284416
659	-0.302639	-0.303963	-0.288579	-0.348934	-0.290561	-0.311678	-0.324961	-0.304512	-0.295825	-0.306587	-0.301535	-0.295979	-0.317014	-0.34042	-0.304002	-0.338269	-0.300631	-0.308681	-0.298191	-0.324627	-0.297817	-0.303491	-0.342511	-0.30213	-0.325785	-0.301869	-0.316659	-0.30203	-0.319961	-0.305943	-0.300558	-0.361786	-0.290451	-0.301724	-0.295634	-0.308838	-0.27965	-0.347122	-0.303061	-0.273919	-0.316806	-0.33714	-0.306637	-0.325822	-0.295102	-0.346747	-0.30511	-0.297771	-0.284416
661	-0.302639	-0.303963	-0.288579	-0.348934	-0.290561	-0.311678	-0.324961	-0.304512	-0.295825	-0.306587	-0.301535	-0.295979	-0.317014	-0.34042	-0.304002	-0.338269	-0.300631	-0.308681	-0.298191	-0.324627	-0.297817	-0.303491	-0.342511	-0.30213	-0.325785	-0.295287	-0.316659	-0.30203	-0.319961	-0.305943	-0.300558	-0.361786	-0.290451	-0.301724	-0.295634	-0.308838	-0.27965	-0.347122	-0.303061	-0.286979	-0.316806	-0.33714	-0.306637	-0.325822	-0.295102	-0.346747	-0.30511	-0.297771	-0.284416
663	-0.302639	-0.303963	-0.288579	-0.348934	-0.290561	-0.311678	-0.324961	-0.304512	-0.295825	-0.306587	-0.301535	-0.295979	-0.317014	-0.34042	-0.304002	-0.338269	-0.300631	-0.308681	-0.298191	-0.324627	-0.297817	-0.303491	-0.342511	-0.30213	-0.325785	-0.288148	-0.316659	-0.30203	-0.319961	-0.305943	-0.300558	-0.361786	-0.290451	-0.301724	-0.295634	-0.308838	-0.27965	-0.347122	-0.303061	-0.296383	-0.316806	-0.33714	-0.306637	-0.325822	-0.295102	-0.346747	-0.30511	-0.297771	-0.284416
665	-0.302639	-0.303963	-0.288579	-0.348934	-0.290561	-0.311678	-0.324961	-0.304512	-0.295825	-0.306587	-0.301535	-0.295979	-0.317014	-0.34042	-0.304002	-0.338269	-0.300631	-0.308681	-0.298191	-0.324627	-0.297817	-0.303491	-0.342511	-0.30213	-0.325785	-0.296362	-0.316659	-0.30203	-0.319961	-0.305943	-0.300558	-0.361786	-0.290451	-0.301724	-0.295634	-0.308838	-0.27965	-0.347122	-0.303061	-0.296383	-0.316806	-0.33714	-0.306637	-0.325822	-0.295102	-0.346747	-0.30511	-0.297771	-0.284416
667	-0.302639	-0.303963	-0.288579	-0.348934	-0.290561	-0.311678	-0.324961	-0.304512	-0.295825	-0.306587	-0.301535	-0.295979	-0.317014	-0.34042	-0.304002	-0.338269	-0.300631	-0.308681	-0.298191	-0.324627	-0.297817	-0.303491	-0.342511	-0.30213	-0.325785	-0.301869	-0.316659	-0.30203	-0.319961	-0.305943	-0.300558	-0.361786	-0.290451	-0.301724	-0.295634	-0.308838	-0.27965	-0.347122	-0.303061	-0.296383	-0.316806	-0.33714	-0.306637	-0.325822	-0.295102	-0.346747	-0.30511	-0.297771	-0.284416
669	-0.302639	-0.303963	-0.288579	-0.348934	-0.290561	-0.311678	-0.324961	-0.304512	-0.295825	-0.306587	-0.301535	-0.295979	-0.317014	-0.34042	-0.304002	-0.338269	-0.300631	-0.308681	-0.298191	-0.324627	-0.297817	-0.303491	-0.342511	-0.30213	-0.325785	-0.301869	-0.316659	-0.30203	-0.319961	-0.305943	-0.300558	-0.361786	-0.290451	-0.301724	-0.295634	-0.308838	-0.27965	-0.347122	-0.303061	-0.296383	-0.316806	-0.33714	-0.306637	-0.325822	-0.295102	-0.346747	-0.30511	-0.297771	-0.284416
671	-0.302639	-0.303963	-0.288579	-0.348934	-0.290561	-0.311678	-0.324961	-0.304512	-0.295825	-0.306587	-0.301535	-0.295979	-0.317014	-0.34042	-0.304002	-0.338269	-0.300631	-0.308681	-0.298191	-0.324627	-0.297817	-0.303491	-0.342511	-0.30213	-0.325785	-0.301869	-0.316659	-0.30203	-0.319961	-0.305943	-0.300558	-0.361786	-0.290451	-0.301724	-0.295634	-0.308838	-0.27965	-0.347122	-0.303061	-0.296383	-0.316806	-0.33714	-0.306637	-0.325822	-0.295102	-0.346747	-0.30511	-0.297771	-0.284416
673	-0.302639	-0.303963	-0.288579	-0.348934	-0.290561	-0.311678	-0.324961	-0.304512	-0.295825	-0.306587	-0.301535	-0.295979	-0.317014	-0.34042	-0.304002	-0.338269	-0.300631	-0.308681	-0.298191	-0.324627	-0.297817	-0.303491	-0.342511	-0.30213	-0.325785	-0.301869	-0.316659	-0.30203	-0.319961	-0.305943	-0.300558	-0.361786	-0.290451	-0.301724	-0.295634	-0.308838	-0.27965	-0.347122	-0.303061	-0.296383	-0.316806	-0.33714	-0.306637	-0.325822	-0.295102	-0.346747	-0.30511	-0.297771	-0.284416
675	-0.302639	-0.303963	-0.288579	-0.348934	-0.290561	-0.311678	-0.324961	-0.304512	-0.295825	-0.306587	-0.301535	-0.295979	-0.317014	-0.34042	-0.304002	-0.338269	-0.300631	-0.308681	-0.298191	-0.324627	-0.297817	-0.303491	-0.342511	-0.30213	-0.325785	-0.301869	-0.316659	-0.30203	-0.319961	-0.305943	-0.300558	-0.361786	-0.290451	-0.301724	-0.295634	-0.308838	-0.27965	-0.347122	-0.303061	-0.296383	-0.316806	-0.33714	-0.306637	-0.325822	-0.295102	-0.346747	-0.30511	-0.297771	-0.284416
677	-0.302639	-0.303963	-0.288579	-0.348934	-0.290561	-0.311678	-0.324961	-0.304512	-0.295825	-0.306587	-0.301535	-0.295979	-0.317014	-0.34042	-0.304002	-0.338269	-0.300631	-0.308681	-0.298191	-0.324627	-0.297817	-0.303491	-0.342511	-0.30213	-0.325785	-0.301869	-0.316659	-0.30203	-0.319961	-0.305943	-0.300558	-0.361786	-0.290451	-0.301724	-0.295634	-0.308838	-0.27965	-0.347122	-0.303061	-0.296383	-0.316806	-0.33714	-0.306637	-0.325822	-0.295102	-0.346747	-0.30511	-0.297771	-0.284416
679	-0.302639	-0.303963	-0.288579	-0.348934	-0.290561	-0.311678	-0.324961	-0.304512	-0.295825	-0.306587	-0.301535	-0.295979	-0.317014	-0.34042	-0.304002	-0.338269	-0.300631	-0.308681	-0.298191	-0.324627	-0.297817	-0.303491	-0.342511	-0.30213	-0.325785	-0.301869	-0.316659	-0.30203	-0.319961	-0.305943	-0.300558	-0.361786	-0.290451	-0.301724	-0.295634	-0.308838	-0.27965	-0.347122	-0.303061	-0.296383	-0.316806	-0.33714	-0.306637	-0.325822	-0.295102	-0.346747	-0.30511	-0.297771	-0.284416
681	-0.302639	-0.303963	-0.288579	-0.348934	-0.290561	-0.311678	-0.324961	-0.304512	-0.295825	-0.306587	-0.301535	-0.295979	-0.317014	-0.34042	-0.304002	-0.338269	-0.300631	-0.308681	-0.298191	-0.324627	-0.297817	-0.303491	-0.342511	-0.30213	-0.325785	-0.301869	-0.316659	-0.30203	-0.319961	-0.305943	-0.300558	-0.361786	-0.290451	-0.301724	-0.295634	-0.308838	-0.27965	-0.347122	-0.303061	-0.296383	-0.316806	-0.33714	-0.306637	-0.325822	-0.295102	-0.346747	-0.30511	-0.297771	-0.284416
683	-0.302639	-0.303963	-0.288579	-0.348934	-0.290561	-0.311678	-0.324961	-0.304512	-0.295825	-0.306587	-0.301535	-0.295979	-0.317014	-0.34042	-0.304002	-0.338269	-0.300631	-0.308681	-0.298191	-0.324627	-0.297817	-0.303491	-0.342511	-0.30213	-0.325785	-0.301869	-0.316659	-0.30203	-0.319961	-0.305943	-0.300558	-0.361786	-0.290451	-0.301724	-0.295634	-0.308838	-0.27965	-0.347122	-0.303061	-0.296383	-0.316806	-0.33714	-0.306637	-0.325822	-0.295102	-0.346747	-0.30511	-0.297771	-0.284416
685	-0.302639	-0.303963	-0.288579	-0.348934	-0.290561	-0.311678	-0.324961	-0.304512	-0.295825	-0.306587	-0.301535	-0.295979	-0.317014	-0.34042	-0.304002	-0.338269	-0.300631	-0.308681	-0.298191	-0.324627	-0.297817	-0.303491	-0.342511	-0.30213	-0.325785	-0.301869	-0.316659	-0.30203	-0.319961	-0.305943	-0.300558	-0.361786	-0.290451	-0.301724	-0.295634	-0.308838	-0.27965	-0.347122	-0.303061	-0.296383	-0.316806	-0.33714	-0.306637	-0.325822	-0.295102	-0.346747	-0.30511	-0.297771	-0.284416
687	-0.302639	-0.303963	-0.288579	-0.348934	-0.290561	-0.311678	-0.324961	-0.304512	-0.295825	-0.306587	-0.301535	-0.295979	-0.317014	-0.34042	-0.304002	-0.338269	-0.300631	-0.308681	-0.298191	-0.324627	-0.297817	-0.303491	-0.342511	-0.30213	-0.325785	-0.301869	-0.316659	-0.30203	-0.319961	-0.305943	-0.300558	-0.361786	-0.290451	-0.301724	-0.295634	-0.308838	-0.27965	-0.347122	-0.303061	-0.296383	-0.316806	-0.33714	-0.306637	-0.325822	-0.295102	-0.346747	-0.30511	-0.297771	-0.284416
689	-0.302639	-0.303963	-0.288579	-0.348934	-0.290561	-0.311678	-0.324961	-0.304512	-0.295825	-0.306587	-0.301535	-0.295979	-0.317014	-0.34042	-0.304002	-0.338269	-0.300631	-0.308681	-0.298191	-0.324627	-0.297817	-0.303491	-0.342511	-0.30213	-0.325785	-0.301869	-0.316659	-0.30203	-0.319961	-0.305943	-0.300558	-0.361786	-0.290451	-0.301724	-0.295634	-0.308838	-0.27965	-0.347122	-0.303061	-0.296383	-0.316806	-0.33714	-0.306637	-0.325822	-0.295102	-0.346747	-0.30511	-0.297771	-0.284416
691	-0.302639	-0.303963	-0.287137	-0.348934	-0.290561	-0.311678	-0.324961	-0.304512	-0.295825	-0.306587	-0.301535	-0.295979	-0.317014	-0.34042	-0.304002	-0.338269	-0.300631	-0.308681	-0.298191	-0.324627	-0.297817	-0.303491	-0.342511	-0.30213	-0.325785	-0.301869	-0.316659	-0.30203	-0.319961	-0.305943	-0.300558	-0.361786	-0.290451	-0.301724	-0.295634	-0.308838	-0.27965	-0.347122	-0.303061	-0.296383	-0.316806	-0.33714	-0.306637	-0.325822	-0.295102	-0.346747	-0.30511	-0.297771	-0.284416
693	-0.302639	-0.303963	-0.279079	-0.348934	-0.290561	-0.311678	-0.324961	-0.304512	-0.295825	-0.306587	-0.301535	-0.295979	-0.317014	-0.34042	-0.304002	-0.338269	-0.300631	-0.308681	-0.298191	-0.324627	-0.297817	-0.303491	-0.342511	-0.30213	-0.325785	-0.301869	-0.316659	-0.30203	-0.319961	-0.305943	-0.300558	-0.361786	-0.290451	-0.301724	-0.295634	-0.308838	-0.27965	-0.347122	-0.303061	-0.296383	-0.316806	-0.33714	-0.306637	-0.325822	-0.295102	-0.346747	-0.30511	-0.297771	-0.284416
695	-0.302639	-0.303963	-0.278164	-0.348934	-0.290561	-0.311678	-0.324961	-0.304512	-0.295825	-0.306587	-0.301535	-0.295979	-0.317014	-0.34042	-0.304002	-0.338269	-0.300631	-0.308681	-0.298191	-0.324627	-0.297817	-0.303491	-0.342511	-0.30213	-0.325785	-0.301869	-0.316659	-0.30203	-0.319961	-0.305943	-0.300558	-0.361786	-0.290451	-0.301724	-0.295634	-0.308838	-0.27965	-0.347122	-0.303061	-0.296383	-0.316806	-0.33714	-0.306637	-0.325822	-0.295102	-0.346747	-0.30511	-0.297771	-0.284416
697	-0.302639	-0.303963	-0.286221	-0.348934	-0.290561	-0.311678	-0.324961	-0.304512	-0.295825	-0.306587	-0.301535	-0.295979	-0.317014	-0.34042	-0.304002	-0.338269	-0.300631	-0.308681	-0.298191	-0.324627	-0.297817	-0.303491	-0.342511	-0.30213	-0.325785	-0.301869	-0.316659	-0.30203	-0.319961	-0.305943	-0.300558	-0.361786	-0.290451	-0.301724	-0.295634	-0.308838	-0.27965	-0.347122	-0.303061	-0.296383	-0.316806	-0.33714	-0.306637	-0.325822	-0.295102	-0.346747	-0.30511	-0.297771	-0.284416
699	-0.302639	-0.303963	-0.288579	-0.348934	-0.290561	-0.311678	-0.324961	-0.304512	-0.295825	-0.306587	-0.301535	-0.295979	-0.317014	-0.34042	-0.304002	-0.338269	-0.300631	-0.308681	-0.298191	-0.324627	-0.297817	-0.303491	-0.342511	-0.30213	-0.325785	-0.301869	-0.316659	-0.30203	-0.319961	-0.305943	-0.300558	-0.361786	-0.290451	-0.301724	-0.295634	-0.308838	-0.27965	-0.347122	-0.303061	-0.296383	-0.316806	-0.33714	-0.306637	-0.325822	-0.295102	-0.346747	-0.30511	-0.297771	-0.284416
701	-0.302639	-0.303963	-0.288579	-0.348934	-0.290561	-0.311678	-0.324961	-0.304512	-0.295825	-0.306587	-0.301535	-0.295979	-0.317014	-0.34042	-0.304002	-0.338269	-0.300631	-0.308681	-0.298191	-0.324627	-0.297817	-0.303491	-0.342511	-0.30213	-0.325785	-0.301869	-0.316659	-0.30203	-0.319961	-0.305943	-0.300558	-0.361786	-0.290451	-0.301724	-0.295634	-0.308838	-0.27965	-0.347122	-0.303061	-0.296383	-0.316806	-0.33714	-0.306637	-0.325822	-0.295102	-0.346747	-0.30511	-0.297771	-0.284416
703	-0.302639	-0.303963	-0.288579	-0.348934	-0.290561	-0.311678	-0.324961	-0.304512	-0.295825	-0.306587	-0.301535	-0.295979	-0.303872	-0.34042	-0.304002	-0.338269	-0.300631	-0.308681	-0.298191	-0.324627	-0.297817	-0.303491	-0.342511	-0.30213	-0.325785	-0.301869	-0.316659	-0.30203	-0.319961	-0.305943	-0.300558	-0.361786	-0.290451	-0.301724	-0.295634	-0.308838	-0.27965	-0.347122	-0.303061	-0.296383	-0.316806	-0.33714	-0.306637	-0.325822	-0.295102	-0.346747	-0.30511	-0.297771	-0.284416
705	-0.302639	-0.303963	-0.288579	-0.348934	-0.290561	-0.311678	-0.324961	-0.304512	-0.295825	-0.306587	-0.301535	-0.295979	-0.296723	-0.34042	-0.304002	-0.338269	-0.300631	-0.308681	-0.298191	-0.324627	-0.297817	-0.303491	-0.342511	-0.30213	-0.325785	-0.301869	-0.316659	-0.30203	-0.319961	-0.305943	-0.300558	-0.361786	-0.290451	-0.301724	-0.295634	-0.308838	-0.27965	-0.347122	-0.303061	-0.296383	-0.316806	-0.33714	-0.306637	-0.325822	-0.295102	-0.346747	-0.30511	-0.297771	-0.284416
707	-0.302639	-0.303963	-0.288579	-0.348934	-0.290561	-0.311678	-0.324961	-0.304512	-0.295825	-0.306587	-0.301535	-0.295979	-0.31025	-0.34042	-0.304002	-0.338269	-0.300631	-0.308681	-0.298191	-0.324627	-0.297817	-0.303491	-0.342511	-0.30213	-0.325785	-0.301869	-0.316659	-0.30203	-0.319961	-0.305943	-0.300558	-0.361786	-0.290451	-0.301724	-0.295634	-0.308838	-0.27965	-0.347122	-0.303061	-0.296383	-0.316806	-0.33714	-0.306637	-0.325822	-0.295102	-0.346747	-0.30511	-0.297771	-0.284416
709	-0.302639	-0.303963	-0.288579	-0.348934	-0.290561	-0.311678	-0.324961	-0.304512	-0.295825	-0.306587	-0.301535	-0.295979	-0.317014	-0.34042	-0.304002	-0.338269	-0.300631	-0.308681	-0.298191	-0.324627	-0.297817	-0.303491	-0.342511	-0.30213	-0.325785	-0.301869	-0.316659	-0.30203	-0.319961	-0.305943	-0.300558	-0.361786	-0.290451	-0.301724	-0.295634	-0.308838	-0.27965	-0.347122	-0.303061	-0.296383	-0.316806	-0.33714	-0.306637	-0.325822	-0.295102	-0.346747	-0.30511	-0.297771	-0.284416
711	-0.302639	-0.303963	-0.288579	-0.348934	-0.290561	-0.311678	-0.324961	-0.304512	-0.295825	-0.306587	-0.301535	-0.295979	-0.317014	-0.34042	-0.304002	-0.338269	-0.300631	-0.308681	-0.298191	-0.324627	-0.297817	-0.303491	-0.342511	-0.30213	-0.325785	-0.301869	-0.316659	-0.30203	-0.319961	-0.305943	-0.300558	-0.361786	-0.290451	-0.301724	-0.295634	-0.308838	-0.27965	-0.347122	-0.303061	-0.296383	-0.316806	-0.33714	-0.306637	-0.325822	-0.295102	-0.346747	-0.30511	-0.297771	-0.284416
713	-0.302639	-0.303963	-0.288579	-0.348934	-0.290561	-0.311678	-0.324961	-0.304512	-0.295825	-0.306587	-0.301535	-0.295979	-0.317014	-0.34042	-0.304002	-0.338269	-0.300631	-0.308681	-0.298191	-0.324627	-0.297817	-0.303491	-0.342511	-0.30213	-0.325785	-0.301869	-0.316659	-0.30203	-0.319961	-0.305943	-0.300558	-0.361786	-0.290451	-0.301724	-0.295634	-0.308838	-0.27965	-0.347122	-0.303061	-0.296383	-0.316806	-0.33714	-0.306637	-0.325822	-0.295102	-0.346747	-0.30511	-0.297771	-0.284416
715	-0.302639	-0.303963	-0.288579	-0.348537	-0.290561	-0.311678	-0.324961	-0.304512	-0.295825	-0.306587	-0.301535	-0.295979	-0.317014	-0.34042	-0.304002	-0.338269	-0.300631	-0.308681	-0.298191	-0.324627	-0.297817	-0.303491	-0.342511	-0.30213	-0.325785	-0.301869	-0.316659	-0.30203	-0.319961	-0.305943	-0.300558	-0.361786	-0.290451	-0.301724	-0.295634	-0.308838	-0.27965	-0.347122	-0.303061	-0.296383	-0.316806	-0.33714	-0.306637	-0.325822	-0.295102	-0.346747	-0.30511	-0.297771	-0.284416
717	-0.302639	-0.303963	-0.288579	-0.334513	-0.290561	-0.311678	-0.324961	-0.304512	-0.295825	-0.306587	-0.301535	-0.295979	-0.317014	-0.34042	-0.304002	-0.338269	-0.300631	-0.308681	-0.298191	-0.324627	-0.297817	-0.303491	-0.342511	-0.30213	-0.325785	-0.301869	-0.316659	-0.30203	-0.319961	-0.305943	-0.300558	-0.361786	-0.290451	-0.301724	-0.295634	-0.308838	-0.27965	-0.347122	-0.303061	-0.296383	-0.316806	-0.33714	-0.306637	-0.325822	-0.295102	-0.346747	-0.30511	-0.297771	-0.284416
719	-0.302639	-0.303963	-0.288579	-0.328693	-0.290561	-0.311678	-0.324961	-0.304512	-0.295825	-0.306587	-0.301535	-0.295979	-0.317014	-0.34042	-0.304002	-0.338269	-0.300631	-0.308681	-0.298191	-0.324627	-0.297817	-0.303491	-0.342511	-0.30213	-0.325785	-0.301869	-0.316659	-0.30203	-0.319961	-0.305943	-0.300558	-0.361786	-0.290451	-0.301724	-0.295634	-0.308838	-0.27965	-0.347122	-0.303061	-0.296383	-0.316806	-0.33714	-0.306637	-0.325822	-0.295102	-0.346747	-0.30511	-0.297771	-0.284416
721	-0.302639	-0.303963	-0.288579	-0.342717	-0.290561	-0.311678	-0.324961	-0.304512	-0.295825	-0.306587	-0.301535	-0.295979	-0.317014	-0.34042	-0.304002	-0.338269	-0.300631	-0.308681	-0.298191	-0.324627	-0.297817	-0.303491	-0.342511	-0.30213	-0.325785	-0.301869	-0.316659	-0.30203	-0.319961	-0.305943	-0.300558	-0.361786	-0.290451	-0.301724	-0.295634	-0.308838	-0.27965	-0.347122	-0.303061	-0.296383	-0.316806	-0.33714	-0.306637	-0.325822	-0.295102	-0.346747	-0.30511	-0.297771	-0.284416
723	-0.302639	-0.303963	-0.288579	-0.348934	-0.290561	-0.311678	-0.324961	-0.304512	-0.295825	-0.306587	-0.301535	-0.295979	-0.317014	-0.34042	-0.304002	-0.338269	-0.300631	-0.308681	-0.298191	-0.324627	-0.297817	-0.303491	-0.342511	-0.30213	-0.325785	-0.301869	-0.316659	-0.30203	-0.319961	-0.305943	-0.300558	-0.361786	-0.290451	-0.301724	-0.295634	-0.308838	-0.27965	-0.347122	-0.303061	-0.296383	-0.316806	-0.33714	-0.306637	-0.325822	-0.295102	-0.346747	-0.30511	-0.297771	-0.284416
725	-0.302639	-0.303963	-0.288579	-0.348934	-0.290561	-0.311678	-0.324961	-0.304512	-0.295825	-0.306587	-0.301535	-0.295979	-0.317014	-0.34042	-0.304002	-0.338269	-0.300631	-0.308681	-0.298191	-0.324627	-0.297817	-0.303491	-0.342511	-0.30213	-0.325785	-0.301869	-0.316659	-0.30203	-0.319961	-0.305943	-0.300558	-0.361786	-0.290451	-0.301724	-0.295634	-0.308838	-0.27965	-0.347122	-0.303061	-0.296383	-0.316806	-0.33714	-0.306637	-0.325822	-0.295102	-0.346747	-0.30511	-0.297771	-0.284416
727	-0.302639	-0.303963	-0.288579	-0.348934	-0.290561	-0.311678	-0.324961	-0.304512	-0.295825	-0.306587	-0.301535	-0.295979	-0.317014	-0.34042	-0.304002	-0.338269	-0.300631	-0.308681	-0.298191	-0.324627	-0.297817	-0.303491	-0.32646	-0.30213	-0.325785	-0.301869	-0.316659	-0.30203	-0.319961	-0.305943	-0.300558	-0.361786	-0.290451	-0.301724	-0.295634	-0.308838	-0.27965	-0.347122	-0.303061	-0.296383	-0.316806	-0.33714	-0.306637	-0.325822	-0.295102	-0.346747	-0.30511	-0.297771	-0.284416
729	-0.302639	-0.303963	-0.288579	-0.348934	-0.290561	-0.311678	-0.324961	-0.304512	-0.295825	-0.306587	-0.301535	-0.295979	-0.317014	-0.34042	-0.304002	-0.338269	-0.300631	-0.308681	-0.298191	-0.324627	-0.297817	-0.303491	-0.310235	-0.30213	-0.325785	-0.301869	-0.316659	-0.30203	-0.319961	-0.305943	-0.300558	-0.361786	-0.290451	-0.301724	-0.295634	-0.308838	-0.27965	-0.347122	-0.303061	-0.296383	-0.316806	-0.33714	-0.306637	-0.325822	-0.295102	-0.346747	-0.30511	-0.297771	-0.284416
731	-0.302639	-0.303963	-0.288579	-0.348934	-0.290561	-0.311678	-0.324961	-0.304512	-0.295825	-0.306587	-0.301535	-0.295979	-0.317014	-0.34042	-0.304002	-0.338269	-0.300631	-0.308681	-0.298191	-0.324627	-0.297817	-0.303491	-0.329788	-0.30213	-0.325785	-0.301869	-0.316659	-0.30203	-0.319961	-0.305943	-0.300558	-0.361786	-0.290451	-0.301724	-0.295634	-0.308838	-0.27965	-0.347122	-0.303061	-0.296383	-0.316806	-0.33714	-0.306637	-0.325822	-0.295102	-0.346747	-0.30511	-0.297771	-0.284416
733	-0.302639	-0.303963	-0.288579	-0.348934	-0.290561	-0.311678	-0.324961	-0.304512	-0.295825	-0.306587	-0.301535	-0.295979	-0.317014	-0.34042	-0.304002	-0.338269	-0.300631	-0.308681	-0.298191	-0.324627	-0.297817	-0.303491	-0.342511	-0.30213	-0.325785	-0.301869	-0.316659	-0.30203	-0.319961	-0.305943	-0.300558	-0.361786	-0.290451	-0.301724	-0.295634	-0.308838	-0.27965	-0.347122	-0.303061	-0.296383	-0.316806	-0.33714	-0.306637	-0.325822	-0.295102	-0.346747	-0.30511	-0.297771	-0.284416
735	-0.302639	-0.303963	-0.288579	-0.348934	-0.290561	-0.311678	-0.324961	-0.304512	-0.295825	-0.306587	-0.301535	-0.295979	-0.317014	-0.34042	-0.304002	-0.338269	-0.300631	-0.308681	-0.298191	-0.324627	-0.297817	-0.303491	-0.342511	-0.30213	-0.325785	-0.301869	-0.316659	-0.30203	-0.319961	-0.305943	-0.300558	-0.361786	-0.290451	-0.301724	-0.295634	-0.308838	-0.27965	-0.347122	-0.303061	-0.296383	-0.316806	-0.33714	-0.306637	-0.325822	-0.295102	-0.346747	-0.30511	-0.297771	-0.284416
737	-0.302639	-0.303963	-0.288579	-0.348934	-0.290561	-0.311678	-0.324961	-0.304512	-0.295825	-0.306587	-0.301535	-0.295979	-0.317014	-0.34042	-0.304002	-0.338269	-0.300631	-0.308681	-0.298191	-0.324627	-0.297817	-0.303491	-0.342511	-0.30213	-0.325785	-0.301869	-0.316659	-0.30203	-0.319961	-0.305943	-0.300558	-0.361786	-0.290451	-0.301724	-0.295634	-0.308838	-0.27965	-0.347122	-0.303061	-0.296383	-0.316806	-0.33714	-0.306637	-0.325822	-0.295102	-0.346747	-0.30511	-0.297771	-0.284416
739	-0.302639	-0.303963	-0.288579	-0.348934	-0.290561	-0.311678	-0.324961	-0.304512	-0.295825	-0.306587	-0.301535	-0.295979	-0.317014	-0.34042	-0.304002	-0.338269	-0.300631	-0.308681	-0.298191	-0.324627	-0.297817	-0.303491	-0.342511	-0.30213	-0.325785	-0.301869	-0.316659	-0.30203	-0.319961	-0.305943	-0.300558	-0.361786	-0.290451	-0.301724	-0.295634	-0.308838	-0.27965	-0.347122	-0.303061	-0.296383	-0.316806	-0.33714	-0.306637	-0.325822	-0.295102	-0.346747	-0.30511	-0.297771	-0.284416
741	-0.302639	-0.303963	-0.288579	-0.348934	-0.290561	-0.311678	-0.324961	-0.304512	-0.295825	-0.306587	-0.301535	-0.295979	-0.317014	-0.34042	-0.304002	-0.338269	-0.300631	-0.308681	-0.298191	-0.324627	-0.297817	-0.303491	-0.342511	-0.30213	-0.325785	-0.301869	-0.316659	-0.30203	-0.319961	-0.305943	-0.300558	-0.361786	-0.290451	-0.301724	-0.295634	-0.308838	-0.27965	-0.347122	-0.303061	-0.296383	-0.316806	-0.33714	-0.306637	-0.325822	-0.295102	-0.346747	-0.30511	-0.297771	-0.284416
743	-0.302639	-0.303963	-0.288579	-0.348934	-0.290561	-0.311678	-0.324961	-0.304512	-0.295825	-0.306587	-0.301535	-0.295979	-0.317014	-0.34042	-0.304002	-0.338269	-0.300631	-0.308681	-0.298191	-0.324627	-0.297817	-0.303491	-0.342511	-0.30213	-0.325785	-0.301869	-0.316659	-0.30203	-0.319961	-0.305943	-0.300558	-0.361786	-0.290451	-0.301724	-0.295634	-0.308838	-0.27965	-0.347122	-0.303061	-0.296383	-0.316806	-0.33714	-0.306637	-0.325822	-0.295102	-0.346747	-0.30511	-0.297771	-0.284416
745	-0.302639	-0.303963	-0.288579	-0.348934	-0.290561	-0.311678	-0.324961	-0.304512	-0.295825	-0.306587	-0.301535	-0.295979	-0.317014	-0.34042	-0.304002	-0.338269	-0.300631	-0.308681	-0.298191	-0.324627	-0.297817	-0.303491	-0.342511	-0.30213	-0.325785	-0.301869	-0.316659	-0.30203	-0.319961	-0.305943	-0.300558	-0.361786	-0.290451	-0.301724	-0.295634	-0.308838	-0.27965	-0.347122	-0.303061	-0.296383	-0.316806	-0.33714	-0.306637	-0.325822	-0.295102	-0.346747	-0.30511	-0.297771	-0.284416
747	-0.302639	-0.303963	-0.288579	-0.348934	-0.290561	-0.311678	-0.324961	-0.304512	-0.295825	-0.306587	-0.301535	-0.295979	-0.317014	-0.34042	-0.304002	-0.338269	-0.300631	-0.308681	-0.298191	-0.324627	-0.297817	-0.303491	-0.342511	-0.30213	-0.325785	-0.301869	-0.316659	-0.30203	-0.319961	-0.305943	-0.300558	-0.361786	-0.290451	-0.301724	-0.295634	-0.308838	-0.27965	-0.347122	-0.303061	-0.296383	-0.316806	-0.33714	-0.306637	-0.325822	-0.295102	-0.346747	-0.30511	-0.297771	-0.284416
749	-0.302639	-0.303963	-0.288579	-0.348934	-0.290561	-0.311678	-0.324961	-0.304512	-0.295825	-0.306587	-0.301535	-0.295979	-0.317014	-0.34042	-0.304002	-0.338269	-0.300631	-0.308681	-0.298191	-0.324627	-0.297817	-0.303491	-0.342511	-0.30213	-0.325785	-0.301869	-0.316659	-0.30203	-0.319961	-0.305943	-0.300558	-0.361786	-0.290451	-0.301724	-0.295634	-0.308838	-0.27965	-0.347122	-0.303061	-0.296383	-0.316806	-0.33714	-0.306637	-0.325822	-0.295102	-0.346747	-0.30511	-0.297771	-0.284416
751	-0.302639	-0.303963	-0.288579	-0.348934	-0.290561	-0.311678	-0.324961	-0.304512	-0.295825	-0.306587	-0.301535	-0.295979	-0.317014	-0.34042	-0.304002	-0.338269	-0.300631	-0.308681	-0.298191	-0.324627	-0.297817	-0.303491	-0.342511	-0.30213	-0.325785	-0.301869	-0.316659	-0.30203	-0.319961	-0.305943	-0.300558	-0.361786	-0.290451	-0.301724	-0.295634	-0.308838	-0.27965	-0.347122	-0.303061	-0.296383	-0.316806	-0.33714	-0.306637	-0.325822	-0.295102	-0.346747	-0.30511	-0.297771	-0.284416
753	-0.302639	-0.303963	-0.288579	-0.348934	-0.290561	-0.311678	-0.324961	-0.304512	-0.295825	-0.306587	-0.301535	-0.295979	-0.317014	-0.34042	-0.304002	-0.338269	-0.300631	-0.308681	-0.298191	-0.324627	-0.297817	-0.303491	-0.342511	-0.30213	-0.325785	-0.301869	-0.316659	-0.30203	-0.319961	-0.305943	-0.300558	-0.361786	-0.290451	-0.301724	-0.295634	-0.308838	-0.27965	-0.347122	-0.303061	-0.294856	-0.316806	-0.33714	-0.306637	-0.325822	-0.295102	-0.346747	-0.30511	-0.297771	-0.284416
755	-0.302639	-0.303963	-0.288579	-0.348934	-0.290561	-0.311678	-0.324961	-0.304512	-0.295825	-0.306587	-0.301535	-0.295979	-0.304962	-0.34042	-0.304002	-0.338269	-0.300631	-0.308681	-0.298191	-0.324627	-0.297817	-0.303491	-0.342511	-0.30213	-0.325785	-0.301869	-0.316659	-0.30203	-0.319961	-0.305943	-0.300558	-0.361786	-0.290451	-0.301724	-0.295634	-0.308838	-0.27965	-0.347122	-0.303061	-0.284457	-0.316806	-0.33714	-0.306637	-0.325822	-0.295102	-0.346747	-0.30511	-0.297771	-0.284416
757	-0.302639	-0.303963	-0.288579	-0.348934	-0.290561	-0.311678	-0.324961	-0.304512	-0.295825	-0.306587	-0.301535	-0.295979	-0.297187	-0.34042	-0.304002	-0.338269	-0.300631	-0.308681	-0.298191	-0.324627	-0.297817	-0.303491	-0.342511	-0.30213	-0.325785	-0.301869	-0.316659	-0.30203	-0.319961	-0.305943	-0.300558	-0.361786	-0.290451	-0.301724	-0.295634	-0.308838	-0.27965	-0.347122	-0.303061	-0.282607	-0.316806	-0.33714	-0.306637	-0.325822	-0.295102	-0.346747	-0.30511	-0.297771	-0.284416
759	-0.302639	-0.303963	-0.288579	-0.348934	-0.290561	-0.311678	-0.324961	-0.304512	-0.295825	-0.306587	-0.301535	-0.295979	-0.310085	-0.34042	-0.304002	-0.338269	-0.300631	-0.308681	-0.298191	-0.324627	-0.297817	-0.303491	-0.342511	-0.30213	-0.325785	-0.301869	-0.316659	-0.30203	-0.319961	-0.305943	-0.300558	-0.361786	-0.290451	-0.301724	-0.295634	-0.308838	-0.27965	-0.347122	-0.303061	-0.293006	-0.316806	-0.33714	-0.306637	-0.325822	-0.295102	-0.346747	-0.30511	-0.297771	-0.284416
761	-0.302639	-0.303963	-0.288579	-0.348934	-0.290561	-0.311678	-0.324961	-0.304512	-0.295825	-0.306587	-0.301535	-0.295979	-0.317014	-0.34042	-0.304002	-0.338269	-0.300631	-0.308681	-0.298191	-0.324627	-0.297817	-0.303491	-0.342511	-0.30213	-0.325785	-0.301869	-0.316659	-0.30203	-0.319961	-0.305943	-0.300558	-0.361786	-0.290451	-0.301724	-0.295634	-0.308838	-0.27965	-0.347122	-0.303061	-0.296383	-0.316806	-0.33714	-0.306637	-0.325822	-0.295102	-0.346747	-0.30511	-0.297771	-0.284416
763	-0.302639	-0.303963	-0.288579	-0.348934	-0.290561	-0.311678	-0.324961	-0.304512	-0.295825	-0.306587	-0.301535	-0.295979	-0.317014	-0.34042	-0.304002	-0.338269	-0.300631	-0.308681	-0.298191	-0.324627	-0.297817	-0.303491	-0.342511	-0.30213	-0.325785	-0.301869	-0.316659	-0.30203	-0.319961	-0.305943	-0.300558	-0.361786	-0.290451	-0.301724	-0.295634	-0.308838	-0.27965	-0.347122	-0.303061	-0.296383	-0.316806	-0.33714	-0.306637	-0.325822	-0.295102	-0.346747	-0.30511	-0.297771	-0.284416
765	-0.302639	-0.303963	-0.288579	-0.348934	-0.290561	-0.311678	-0.324961	-0.304512	-0.295825	-0.306587	-0.301535	-0.295979	-0.317014	-0.34042	-0.304002	-0.338269	-0.300631	-0.308681	-0.298191	-0.324627	-0.297817	-0.303491	-0.342511	-0.30213	-0.325785	-0.301869	-0.316659	-0.30203	-0.319961	-0.305943	-0.300558	-0.361786	-0.290451	-0.301724	-0.295634	-0.308838	-0.27965	-0.347122	-0.303061	-0.296383	-0.316806	-0.33714	-0.306637	-0.325822	-0.295102	-0.346747	-0.30511	-0.297771	-0.284416
767	-0.302639	-0.303963	-0.288579	-0.348934	-0.290561	-0.311678	-0.324961	-0.304512	-0.295825	-0.306587	-0.301535	-0.295979	-0.317014	-0.34042	-0.304002	-0.338269	-0.300631	-0.308681	-0.298191	-0.324627	-0.297817	-0.303491	-0.342511	-0.30213	-0.325785	-0.301869	-0.316659	-0.30203	-0.319961	-0.305943	-0.300558	-0.361786	-0.290451	-0.301724	-0.295634	-0.308838	-0.27965	-0.347122	-0.303061	-0.296383	-0.316806	-0.33714	-0.306637	-0.325822	-0.295102	-0.346747	-0.30511	-0.297771	-0.284416
769	-0.302639	-0.303963	-0.288579	-0.348934	-0.290561	-0.311678	-0.324961	-0.304512	-0.295825	-0.306587	-0.301535	-0.295979	-0.317014	-0.34042	-0.304002	-0.338269	-0.300631	-0.308681	-0.298191	-0.324627	-0.297817	-0.303491	-0.342511	-0.30213	-0.317179	-0.301869	-0.316659	-0.30203	-0.319961	-0.305943	-0.300558	-0.361786	-0.290451	-0.301724	-0.295634	-0.308838	-0.27965	-0.347122	-0.303061	-0.296383	-0.316806	-0.33714	-0.306637	-0.325822	-0.295102	-0.346747	-0.30511	-0.297771	-0.284416
771	-0.302639	-0.303963	-0.288579	-0.348934	-0.290561	-0.311678	-0.324961	-0.304512	-0.295825	-0.306587	-0.301535	-0.295979	-0.317014	-0.34042	-0.304002	-0.338269	-0.300631	-0.308681	-0.298191	-0.324627	-0.297817	-0.303491	-0.342511	-0.30213	-0.312932	-0.301869	-0.316659	-0.30203	-0.319961	-0.305943	-0.300558	-0.361786	-0.290451	-0.301724	-0.295634	-0.308838	-0.27965	-0.347122	-0.303061	-0.296383	-0.316806	-0.33714	-0.306637	-0.325822	-0.295102	-0.346747	-0.30511	-0.297771	-0.284416
773	-0.302639	-0.303963	-0.288579	-0.348934	-0.290561	-0.311678	-0.324961	-0.304512	-0.295825	-0.306587	-0.301535	-0.295979	-0.317014	-0.34042	-0.304002	-0.338269	-0.300631	-0.308681	-0.298191	-0.324627	-0.297817	-0.303491	-0.342511	-0.30213	-0.321614	-0.301869	-0.316659	-0.30203	-0.319961	-0.305943	-0.300558	-0.361786	-0.290451	-0.301724	-0.295634	-0.308838	-0.27965	-0.347122	-0.303061	-0.296383	-0.316806	-0.33714	-0.306637	-0.325822	-0.295102	-0.346747	-0.30511	-0.297771	-0.284416
775	-0.302639	-0.303963	-0.288579	-0.348934	-0.290561	-0.311678	-0.324961	-0.304512	-0.295825	-0.306587	-0.301535	-0.295979	-0.317014	-0.34042	-0.304002	-0.338269	-0.300631	-0.308681	-0.298191	-0.324627	-0.297817	-0.303491	-0.342511	-0.30213	-0.325785	-0.301869	-0.316659	-0.30203	-0.319961	-0.305943	-0.300558	-0.361786	-0.290451	-0.301724	-0.295634	-0.308838	-0.27965	-0.347122	-0.303061	-0.296383	-0.316806	-0.33714	-0.306637	-0.325822	-0.295102	-0.346747	-0.30511	-0.297771	-0.284416
777	-0.302639	-0.303963	-0.288579	-0.348934	-0.290561	-0.311678	-0.324961	-0.304512	-0.295825	-0.306587	-0.301535	-0.295979	-0.317014	-0.34042	-0.304002	-0.338269	-0.300631	-0.308681	-0.298191	-0.324627	-0.297817	-0.303491	-0.342511	-0.30213	-0.325785	-0.301869	-0.316659	-0.30203	-0.319961	-0.305943	-0.300558	-0.361786	-0.290451	-0.301724	-0.295634	-0.308838	-0.27965	-0.347122	-0.303061	-0.296383	-0.316806	-0.33714	-0.306637	-0.325822	-0.295102	-0.346747	-0.30511	-0.297771	-0.284416
779	-0.302639	-0.303963	-0.288579	-0.348934	-0.290561	-0.311678	-0.324961	-0.304512	-0.295825	-0.306587	-0.301535	-0.295979	-0.317014	-0.34042	-0.304002	-0.338269	-0.300631	-0.308681	-0.298191	-0.324627	-0.297817	-0.303491	-0.342511	-0.30213	-0.325785	-0.301869	-0.316659	-0.30203	-0.319961	-0.305943	-0.300558	-0.361786	-0.290451	-0.301724	-0.295634	-0.308838	-0.27965	-0.347122	-0.303061	-0.296383	-0.316806	-0.33714	-0.306637	-0.325822	-0.295102	-0.346747	-0.30511	-0.297771	-0.284416
781	-0.302639	-0.303963	-0.288579	-0.348934	-0.290561	-0.311678	-0.324961	-0.304512	-0.295825	-0.306587	-0.301535	-0.295979	-0.317014	-0.34042	-0.304002	-0.338269	-0.300631	-0.308681	-0.298191	-0.324627	-0.297817	-0.303491	-0.342511	-0.30213	-0.325785	-0.301869	-0.316659	-0.30203	-0.319961	-0.305943	-0.300558	-0.361786	-0.290451	-0.301724	-0.295634	-0.308838	-0.27965	-0.347122	-0.303061	-0.296383	-0.316806	-0.33714	-0.306637	-0.325822	-0.295102	-0.346747	-0.30511	-0.297771	-0.284416
783	-0.302639	-0.303963	-0.288579	-0.348934	-0.290561	-0.311678	-0.324961	-0.304512	-0.295825	-0.306587	-0.301535	-0.295979	-0.317014	-0.34042	-0.304002	-0.338269	-0.300631	-0.308681	-0.298191	-0.324627	-0.297817	-0.303491	-0.342511	-0.30213	-0.325785	-0.301869	-0.316659	-0.30203	-0.319961	-0.305943	-0.300558	-0.361786	-0.290451	-0.301724	-0.295634	-0.308838	-0.27965	-0.347122	-0.303061	-0.296383	-0.316806	-0.33714	-0.306637	-0.325822	-0.295102	-0.346747	-0.30511	-0.297771	-0.284416
785	-0.302639	-0.303963	-0.288579	-0.348934	-0.290561	-0.311678	-0.324961	-0.304512	-0.295825	-0.306587	-0.301535	-0.295979	-0.317014	-0.34042	-0.304002	-0.338269	-0.300631	-0.308681	-0.298191	-0.324627	-0.297817	-0.303491	-0.342511	-0.30213	-0.325785	-0.301869	-0.316659	-0.30203	-0.319961	-0.305943	-0.300558	-0.361786	-0.290451	-0.301724	-0.295634	-0.308838	-0.27965	-0.347122	-0.303061	-0.296383	-0.316806	-0.33714	-0.306637	-0.325822	-0.295102	-0.346747	-0.30511	-0.297771	-0.284416
787	-0.302639	-0.303963	-0.288579	-0.348934	-0.290561	-0.311678	-0.324961	-0.304512	-0.295825	-0.306587	-0.301535	-0.295979	-0.317014	-0.34042	-0.304002	-0.338269	-0.300631	-0.308681	-0.298191	-0.324627	-0.297817	-0.303491	-0.342511	-0.30213	-0.325785	-0.301869	-0.316659	-0.30203	-0.319961	-0.305943	-0.300558	-0.361786	-0.290451	-0.301724	-0.295634	-0.308838	-0.27965	-0.347122	-0.303061	-0.296383	-0.316806	-0.33714	-0.306637	-0.325822	-0.295102	-0.346747	-0.30511	-0.297771	-0.284416
789	-0.302639	-0.303963	-0.288579	-0.348934	-0.290561	-0.311678	-0.324961	-0.304512	-0.295825	-0.306587	-0.301535	-0.295979	-0.317014	-0.34042	-0.304002	-0.338269	-0.300631	-0.308681	-0.298191	-0.324627	-0.297817	-0.303491	-0.342511	-0.30213	-0.325785	-0.301869	-0.316659	-0.30203	-0.319961	-0.305943	-0.300558	-0.361786	-0.290451	-0.301724	-0.295634	-0.308838	-0.27965	-0.347122	-0.303061	-0.296383	-0.316806	-0.33714	-0.306637	-0.325822	-0.295102	-0.346747	-0.30511	-0.297771	-0.284416
791	-0.302639	-0.303963	-0.288579	-0.348934	-0.290561	-0.311678	-0.324961	-0.304512	-0.295825	-0.306587	-0.301535	-0.295979	-0.317014	-0.34042	-0.304002	-0.338269	-0.300631	-0.308681	-0.298191	-0.324627	-0.297817	-0.303491	-0.342511	-0.30213	-0.325785	-0.301869	-0.316659	-0.30203	-0.319961	-0.305943	-0.300558	-0.361786	-0.290451	-0.301724	-0.295634	-0.308838	-0.27965	-0.347122	-0.303061	-0.296383	-0.316806	-0.33714	-0.306637	-0.325822	-0.295102	-0.346747	-0.30511	-0.297771	-0.284416
793	-0.302639	-0.303963	-0.288579	-0.348934	-0.290561	-0.311678	-0.324961	-0.304512	-0.295825	-0.306587	-0.301535	-0.295979	-0.317014	-0.34042	-0.304002	-0.338269	-0.300631	-0.308681	-0.298191	-0.324627	-0.297817	-0.303491	-0.342511	-0.30213	-0.325785	-0.301869	-0.316659	-0.30203	-0.319961	-0.305943	-0.300558	-0.361786	-0.290451	-0.301724	-0.295634	-0.308838	-0.27965	-0.347122	-0.303061	-0.296383	-0.316806	-0.33714	-0.306637	-0.325822	-0.295102	-0.346747	-0.30511	-0.297771	-0.284416
795	-0.302639	-0.303963	-0.288579	-0.348934	-0.290561	-0.311678	-0.324961	-0.304512	-0.295825	-0.306587	-0.301535	-0.295979	-0.317014	-0.34042	-0.304002	-0.338269	-0.300631	-0.308681	-0.298191	-0.324627	-0.297817	-0.303491	-0.342511	-0.30213	-0.325785	-0.301869	-0.316659	-0.30203	-0.319961	-0.305943	-0.300558	-0.361786	-0.290451	-0.301724	-0.295634	-0.308838	-0.27965	-0.347122	-0.303061	-0.296383	-0.316806	-0.33714	-0.306637	-0.325822	-0.295102	-0.346747	-0.30511	-0.297771	-0.284416
797	-0.302639	-0.303963	-0.288579	-0.348934	-0.290561	-0.311678	-0.324961	-0.304512	-0.295825	-0.306587	-0.301535	-0.295979	-0.317014	-0.34042	-0.304002	-0.338269	-0.300631	-0.308681	-0.298191	-0.324627	-0.297817	-0.303491	-0.342511	-0.30213	-0.325785	-0.301869	-0.316659	-0.30203	-0.319961	-0.305943	-0.300558	-0.361786	-0.290451	-0.301724	-0.295634	-0.308838	-0.27965	-0.347122	-0.303061	-0.296383	-0.316806	-0.33714	-0.306637	-0.325822	-0.295102	-0.346747	-0.30511	-0.297771	-0.284416
799	-0.302639	-0.303963	-0.288579	-0.348934	-0.290561	-0.311678	-0.324961	-0.304512	-0.295825	-0.306587	-0.301535	-0.295979	-0.317014	-0.34042	-0.304002	-0.338269	-0.300631	-0.308681	-0.298191	-0.324627	-0.297817	-0.303491	-0.342511	-0.30213	-0.321212	-0.301869	-0.316659	-0.30203	-0.319961	-0.305943	-0.300558	-0.361786	-0.290451	-0.301724	-0.295634	-0.308838	-0.27965	-0.347122	-0.303061	-0.296383	-0.316806	-0.33714	-0.306637	-0.325822	-0.295102	-0.346747	-0.30511	-0.297771	-0.284416
801	-0.302639	-0.303963	-0.288579	-0.348934	-0.290561	-0.311678	-0.324961	-0.304512	-0.295825	-0.306587	-0.301535	-0.295979	-0.317014	-0.34042	-0.304002	-0.338269	-0.300631	-0.308681	-0.298191	-0.324627	-0.297817	-0.303491	-0.342511	-0.30213	-0.308815	-0.301869	-0.316659	-0.30203	-0.319961	-0.305943	-0.300558	-0.361786	-0.290451	-0.301724	-0.295634	-0.308838	-0.27965	-0.347122	-0.303061	-0.296383	-0.316806	-0.33714	-0.306637	-0.325822	-0.295102	-0.346747	-0.30511	-0.297771	-0.284416
803	-0.302639	-0.303963	-0.288579	-0.348934	-0.290561	-0.311678	-0.324961	-0.304512	-0.295825	-0.306587	-0.301535	-0.295979	-0.317014	-0.34042	-0.304002	-0.338269	-0.300631	-0.308681	-0.298191	-0.324627	-0.297817	-0.303491	-0.342511	-0.30213	-0.305512	-0.301869	-0.316659	-0.30203	-0.319961	-0.305943	-0.300558	-0.361786	-0.290451	-0.301724	-0.295634	-0.308838	-0.27965	-0.347122	-0.303061	-0.296383	-0.316806	-0.33714	-0.306637	-0.325822	-0.295102	-0.346747	-0.30511	-0.297771	-0.284416
805	-0.302639	-0.303963	-0.288579	-0.348934	-0.290561	-0.311678	-0.324961	-0.304512	-0.295825	-0.306587	-0.301535	-0.295979	-0.317014	-0.34042	-0.304002	-0.338269	-0.300631	-0.308681	-0.298191	-0.324627	-0.297817	-0.303491	-0.342511	-0.30213	-0.30748	-0.301869	-0.316659	-0.30203	-0.319961	-0.305943	-0.300558	-0.361786	-0.290451	-0.301724	-0.295634	-0.308838	-0.27965	-0.347122	-0.303061	-0.296383	-0.316806	-0.33714	-0.306637	-0.325822	-0.295102	-0.346747	-0.30511	-0.297771	-0.284416
807	-0.302639	-0.303963	-0.288579	-0.348934	-0.290561	-0.311678	-0.324961	-0.304512	-0.295825	-0.306587	-0.290514	-0.288561	-0.317014	-0.34042	-0.304002	-0.338269	-0.300631	-0.308681	-0.298191	-0.324627	-0.297817	-0.303491	-0.342511	-0.30213	-0.30709	-0.301869	-0.316659	-0.30203	-0.319961	-0.305943	-0.290595	-0.361786	-0.290451	-0.301724	-0.295634	-0.308838	-0.27965	-0.347122	-0.303061	-0.296383	-0.316806	-0.33714	-0.306637	-0.325822	-0.295102	-0.346747	-0.30511	-0.297771	-0.284416
809	-0.302639	-0.303963	-0.288579	-0.348934	-0.290561	-0.311678	-0.324961	-0.304512	-0.295825	-0.306587	-0.282199	-0.281209	-0.317014	-0.34042	-0.304002	-0.338269	-0.300631	-0.308681	-0.298191	-0.324627	-0.297817	-0.303491	-0.342511	-0.30213	-0.306791	-0.301869	-0.316659	-0.30203	-0.319961	-0.305943	-0.280835	-0.361786	-0.290451	-0.301724	-0.295634	-0.308838	-0.27965	-0.347122	-0.303061	-0.296383	-0.316806	-0.33714	-0.306637	-0.325822	-0.295102	-0.346747	-0.30511	-0.297771	-0.284416
811	-0.302639	-0.303963	-0.288579	-0.348934	-0.290561	-0.311678	-0.324961	-0.304512	-0.295825	-0.306587	-0.294481	-0.278605	-0.317014	-0.34042	-0.304002	-0.338269	-0.300631	-0.308681	-0.298191	-0.324627	-0.297817	-0.303491	-0.342511	-0.30213	-0.308358	-0.301869	-0.316659	-0.30203	-0.319961	-0.305943	-0.278044	-0.361786	-0.290451	-0.301724	-0.295634	-0.308838	-0.27965	-0.347122	-0.303061	-0.296383	-0.316806	-0.33714	-0.306637	-0.325822	-0.295102	-0.346747	-0.30511	-0.297771	-0.284416
813	-0.302639	-0.303963	-0.288579	-0.348934	-0.290561	-0.311678	-0.324961	-0.304512	-0.295825	-0.306587	-0.301535	-0.276407	-0.317014	-0.34042	-0.304002	-0.338269	-0.300631	-0.308681	-0.298191	-0.324627	-0.297817	-0.303491	-0.342511	-0.30213	-0.308677	-0.301869	-0.316659	-0.298521	-0.319961	-0.301173	-0.27463	-0.361786	-0.290451	-0.29773	-0.295634	-0.308838	-0.27965	-0.347122	-0.303061	-0.296383	-0.316806	-0.33714	-0.306637	-0.325822	-0.295102	-0.346747	-0.30511	-0.297771	-0.284416
815	-0.302639	-0.303963	-0.288579	-0.348934	-0.290561	-0.311678	-0.324961	-0.304512	-0.295825	-0.306587	-0.301535	-0.274756	-0.317014	-0.34042	-0.304002	-0.338269	-0.300631	-0.308681	-0.298191	-0.324627	-0.297817	-0.303491	-0.342511	-0.30213	-0.307311	-0.301869	-0.316659	-0.290276	-0.319961	-0.289966	-0.270374	-0.361786	-0.290451	-0.291459	-0.295634	-0.308838	-0.27965	-0.347122	-0.303061	-0.296383	-0.316806	-0.33714	-0.306637	-0.325822	-0.295102	-0.346747	-0.30511	-0.297771	-0.284416
817	-0.302639	-0.303963	-0.288579	-0.348934	-0.290561	-0.311678	-0.324961	-0.304512	-0.295825	-0.306587	-0.292643	-0.271983	-0.317014	-0.34042	-0.304002	-0.338269	-0.300631	-0.308681	-0.298191	-0.324627	-0.297817	-0.303491	-0.342511	-0.30213	-0.297383	-0.301869	-0.316659	-0.293407	-0.319961	-0.282948	-0.259161	-0.361786	-0.290451	-0.288825	-0.295634	-0.308838	-0.27965	-0.347122	-0.303061	-0.296383	-0.316806	-0.33714	-0.306637	-0.314147	-0.295102	-0.346747	-0.30511	-0.297771	-0.284416
819	-0.302639	-0.303963	-0.288579	-0.348934	-0.290561	-0.311678	-0.324961	-0.304512	-0.295825	-0.306587	-0.279753	-0.268706	-0.317014	-0.34042	-0.304002	-0.338269	-0.300631	-0.308681	-0.298191	-0.324627	-0.297817	-0.303491	-0.342511	-0.30213	-0.283605	-0.301869	-0.316659	-0.301651	-0.319961	-0.277813	-0.24482	-0.361786	-0.290451	-0.285579	-0.295634	-0.308838	-0.27965	-0.347122	-0.303061	-0.296383	-0.316806	-0.33714	-0.306637	-0.303648	-0.295102	-0.346747	-0.30511	-0.297771	-0.284416
821	-0.302639	-0.303963	-0.288579	-0.348934	-0.290561	-0.311678	-0.324961	-0.287377	-0.295825	-0.306587	-0.263971	-0.259584	-0.317014	-0.34042	-0.304002	-0.338269	-0.300631	-0.293425	-0.298191	-0.324627	-0.297817	-0.298523	-0.342511	-0.30213	-0.281686	-0.301869	-0.316659	-0.29332	-0.319961	-0.24988	-0.258449	-0.361786	-0.283265	-0.277219	-0.295634	-0.308838	-0.27965	-0.347122	-0.303061	-0.296383	-0.316806	-0.33714	-0.306637	-0.305577	-0.295102	-0.346747	-0.30511	-0.297771	-0.284416
823	-0.302639	-0.303963	-0.288579	-0.348934	-0.290561	-0.311678	-0.324961	-0.273418	-0.295825	-0.306587	-0.251157	-0.251415	-0.317014	-0.34042	-0.304002	-0.338269	-0.300631	-0.281842	-0.298191	-0.324627	-0.297817	-0.294283	-0.342511	-0.30213	-0.277606	-0.301869	-0.316659	-0.282622	-0.319961	-0.227209	-0.265136	-0.361786	-0.27902	-0.272631	-0.295634	-0.308838	-0.27965	-0.347122	-0.303061	-0.296383	-0.316806	-0.33714	-0.306637	-0.311412	-0.295102	-0.346747	-0.30511	-0.297771	-0.284416
825	-0.302639	-0.303963	-0.288579	-0.348934	-0.290561	-0.311678	-0.324961	-0.273786	-0.295825	-0.306587	-0.249469	-0.247671	-0.317014	-0.34042	-0.304002	-0.338269	-0.300631	-0.286047	-0.298191	-0.324627	-0.297817	-0.293507	-0.342511	-0.30213	-0.263739	-0.301869	-0.316659	-0.266303	-0.319961	-0.227318	-0.242138	-0.361786	-0.286553	-0.273057	-0.295634	-0.308838	-0.27965	-0.347122	-0.303061	-0.296383	-0.316806	-0.33714	-0.306637	-0.32244	-0.295102	-0.346747	-0.30511	-0.297771	-0.284416
827	-0.302639	-0.303963	-0.28478	-0.348934	-0.285611	-0.311678	-0.324961	-0.266453	-0.295825	-0.306587	-0.256487	-0.24291	-0.317014	-0.34042	-0.304002	-0.338269	-0.300631	-0.286135	-0.298191	-0.324627	-0.297817	-0.292418	-0.342511	-0.297879	-0.248198	-0.301869	-0.316659	-0.257312	-0.319961	-0.226148	-0.227615	-0.352063	-0.290451	-0.271148	-0.295634	-0.308838	-0.27965	-0.347122	-0.303061	-0.296383	-0.316806	-0.33714	-0.306637	-0.325822	-0.29062	-0.346747	-0.300465	-0.297771	-0.284416
829	-0.302639	-0.303963	-0.276905	-0.348934	-0.27535	-0.311678	-0.324961	-0.25086	-0.295825	-0.306587	-0.272843	-0.23706	-0.317014	-0.34042	-0.304002	-0.338269	-0.300631	-0.281805	-0.298191	-0.324627	-0.297817	-0.290992	-0.342511	-0.289066	-0.230859	-0.301869	-0.316659	-0.256181	-0.319961	-0.223605	-0.222185	-0.331909	-0.290451	-0.268207	-0.295634	-0.308838	-0.27965	-0.347122	-0.303061	-0.296383	-0.316806	-0.33714	-0.306637	-0.325822	-0.284157	-0.346747	-0.293766	-0.297771	-0.284416
831	-0.302639	-0.303963	-0.273757	-0.348934	-0.27483	-0.311678	-0.324961	-0.256773	-0.295825	-0.296806	-0.262583	-0.231252	-0.317014	-0.34042	-0.304002	-0.338269	-0.300631	-0.268776	-0.294127	-0.324627	-0.297817	-0.284366	-0.342511	-0.287044	-0.218216	-0.301869	-0.316659	-0.25328	-0.319961	-0.217808	-0.216166	-0.34185	-0.283391	-0.257739	-0.295634	-0.308838	-0.27965	-0.347122	-0.303061	-0.296383	-0.316806	-0.33714	-0.306637	-0.314367	-0.276027	-0.346747	-0.291824	-0.297771	-0.284416
833	-0.302498	-0.303963	-0.272198	-0.348934	-0.277552	-0.311678	-0.324961	-0.269866	-0.295825	-0.283823	-0.243469	-0.225445	-0.317014	-0.34042	-0.303895	-0.338269	-0.300631	-0.252884	-0.288651	-0.324627	-0.297735	-0.276003	-0.342511	-0.287417	-0.207255	-0.301869	-0.316659	-0.249656	-0.319961	-0.210789	-0.209906	-0.361786	-0.273929	-0.248249	-0.293434	-0.30654	-0.277789	-0.347122	-0.301041	-0.296383	-0.316806	-0.33714	-0.305075	-0.302857	-0.26832	-0.346747	-0.287654	-0.297771	-0.284416
835	-0.28943	-0.303963	-0.269233	-0.348934	-0.274588	-0.311678	-0.324961	-0.272109	-0.295825	-0.281418	-0.240641	-0.218368	-0.317014	-0.34042	-0.294026	-0.338269	-0.300631	-0.245191	-0.280202	-0.324627	-0.290153	-0.270171	-0.342511	-0.295946	-0.204394	-0.301869	-0.316659	-0.234933	-0.319961	-0.192953	-0.199766	-0.361786	-0.264029	-0.24337	-0.283506	-0.296172	-0.26939	-0.347122	-0.291929	-0.296383	-0.316806	-0.33714	-0.298024	-0.292945	-0.262359	-0.346747	-0.274912	-0.297771	-0.284416
837	-0.280345	-0.303963	-0.267498	-0.348934	-0.271709	-0.311678	-0.324961	-0.268771	-0.293337	-0.281132	-0.235523	-0.210326	-0.317014	-0.335728	-0.286756	-0.338269	-0.298147	-0.238464	-0.272852	-0.321005	-0.281641	-0.263882	-0.342511	-0.298898	-0.201736	-0.301869	-0.316659	-0.222085	-0.319961	-0.175374	-0.190402	-0.354057	-0.254843	-0.235839	-0.275893	-0.288478	-0.262132	-0.336166	-0.286276	-0.296383	-0.316806	-0.327477	-0.289507	-0.277276	-0.258987	-0.337265	-0.260427	-0.294158	-0.284416
839	-0.281758	-0.303963	-0.269004	-0.348934	-0.269055	-0.311678	-0.324961	-0.250717	-0.284291	-0.286432	-0.224363	-0.199742	-0.317014	-0.318665	-0.286338	-0.338269	-0.289117	-0.234286	-0.2684	-0.307835	-0.27068	-0.256387	-0.342511	-0.287146	-0.199615	-0.301869	-0.316659	-0.214179	-0.319961	-0.158473	-0.183082	-0.325956	-0.247544	-0.2255	-0.270732	-0.283614	-0.256082	-0.31361	-0.284285	-0.296383	-0.316806	-0.30758	-0.279437	-0.255512	-0.258356	-0.317742	-0.244094	-0.286718	-0.284416
841	-0.279658	-0.299426	-0.271096	-0.348934	-0.262232	-0.311678	-0.324961	-0.242722	-0.280019	-0.287261	-0.206873	-0.19505	-0.317014	-0.308804	-0.286429	-0.338269	-0.289825	-0.234435	-0.265527	-0.308868	-0.262683	-0.253065	-0.342511	-0.279922	-0.194556	-0.301869	-0.316659	-0.214863	-0.312118	-0.151766	-0.177455	-0.328159	-0.241092	-0.21084	-0.27361	-0.293819	-0.261669	-0.32488	-0.292113	-0.290405	-0.316806	-0.303518	-0.289755	-0.249871	-0.257697	-0.327497	-0.233857	-0.283898	-0.275244
843	-0.274556	-0.291011	-0.273691	-0.348934	-0.251847	-0.311678	-0.324961	-0.243323	-0.279827	-0.284268	-0.183973	-0.195391	-0.317014	-0.305098	-0.286954	-0.338269	-0.298855	-0.238283	-0.264004	-0.322038	-0.257218	-0.253309	-0.342511	-0.276569	-0.186986	-0.301869	-0.316659	-0.222888	-0.297573	-0.153771	-0.173275	-0.356261	-0.235364	-0.195027	-0.279225	-0.308838	-0.271076	-0.346888	-0.303061	-0.282535	-0.316672	-0.304725	-0.306637	-0.249759	-0.257091	-0.346747	-0.225763	-0.282757	-0.263165
845	-0.264796	-0.290253	-0.272333	-0.348934	-0.245573	-0.311678	-0.324961	-0.243434	-0.278989	-0.28331	-0.173445	-0.194287	-0.317014	-0.307304	-0.2949	-0.338269	-0.300631	-0.239161	-0.268148	-0.324627	-0.255486	-0.258198	-0.342511	-0.276892	-0.182466	-0.301869	-0.307536	-0.236481	-0.296893	-0.148126	-0.175266	-0.361786	-0.236846	-0.199564	-0.288754	-0.308838	-0.276055	-0.330107	-0.303061	-0.28193	-0.30704	-0.30499	-0.306637	-0.260178	-0.260932	-0.346747	-0.225443	-0.291476	-0.261978
847	-0.255673	-0.291787	-0.269427	-0.348934	-0.240688	-0.311678	-0.324961	-0.243534	-0.277696	-0.283803	-0.166937	-0.192871	-0.317014	-0.310358	-0.304002	-0.338269	-0.300631	-0.238934	-0.273299	-0.324627	-0.254794	-0.263383	-0.342511	-0.278134	-0.178632	-0.301869	-0.297716	-0.250138	-0.299313	-0.141357	-0.178877	-0.361786	-0.240015	-0.204099	-0.295634	-0.308838	-0.27965	-0.322658	-0.303061	-0.283879	-0.302765	-0.3103	-0.306637	-0.266984	-0.262448	-0.346747	-0.22612	-0.297771	-0.26359
849	-0.271063	-0.299086	-0.258492	-0.348934	-0.241097	-0.311678	-0.324961	-0.245147	-0.272299	-0.297461	-0.174123	-0.192045	-0.317014	-0.305167	-0.304002	-0.338269	-0.300631	-0.233473	-0.273181	-0.324627	-0.255846	-0.25695	-0.342511	-0.279634	-0.173953	-0.301869	-0.309071	-0.24589	-0.297712	-0.1449	-0.184022	-0.361786	-0.242116	-0.208627	-0.295634	-0.308838	-0.27965	-0.339439	-0.303061	-0.292456	-0.312396	-0.328711	-0.306637	-0.26441	-0.257926	-0.346747	-0.229388	-0.297771	-0.272469
851	-0.280196	-0.301276	-0.254903	-0.348934	-0.240909	-0.311678	-0.324961	-0.244702	-0.269391	-0.306587	-0.180063	-0.193182	-0.317014	-0.302107	-0.29966	-0.338269	-0.300631	-0.227521	-0.273085	-0.324627	-0.258413	-0.251785	-0.342511	-0.28079	-0.172438	-0.301869	-0.316659	-0.238759	-0.29614	-0.147908	-0.190346	-0.361786	-0.243677	-0.21548	-0.295634	-0.308838	-0.277088	-0.347122	-0.303061	-0.296383	-0.316806	-0.33714	-0.302188	-0.264186	-0.256997	-0.346747	-0.23873	-0.297771	-0.278996
853	-0.276725	-0.293177	-0.266113	-0.348934	-0.239521	-0.311678	-0.324961	-0.240114	-0.271494	-0.306587	-0.183495	-0.198273	-0.317014	-0.303342	-0.286573	-0.338269	-0.300631	-0.22058	-0.273033	-0.324627	-0.264035	-0.249172	-0.342511	-0.281254	-0.177294	-0.301869	-0.316659	-0.225823	-0.294628	-0.149839	-0.199046	-0.361786	-0.244155	-0.224296	-0.295634	-0.308838	-0.272363	-0.347122	-0.303061	-0.296383	-0.316806	-0.33714	-0.293982	-0.265946	-0.259103	-0.346747	-0.253201	-0.297771	-0.283537
855	-0.27374	-0.283046	-0.269094	-0.348934	-0.240218	-0.311678	-0.324961	-0.235825	-0.273747	-0.29598	-0.186933	-0.196982	-0.317014	-0.303444	-0.279166	-0.338269	-0.300631	-0.216937	-0.26943	-0.316641	-0.265227	-0.246807	-0.342511	-0.280925	-0.181815	-0.301869	-0.316659	-0.214848	-0.295872	-0.147303	-0.194382	-0.361786	-0.244105	-0.22073	-0.287677	-0.298903	-0.269094	-0.347122	-0.295681	-0.296383	-0.316806	-0.324403	-0.290343	-0.263698	-0.258386	-0.346747	-0.258961	-0.297771	-0.280838
857	-0.271083	-0.271536	-0.266497	-0.348934	-0.24233	-0.311678	-0.324961	-0.231738	-0.276102	-0.278182	-0.190376	-0.191364	-0.317014	-0.302778	-0.275611	-0.338269	-0.300631	-0.215529	-0.263419	-0.30324	-0.263416	-0.24461	-0.342511	-0.280058	-0.18611	-0.301869	-0.316659	-0.205204	-0.298985	-0.141737	-0.180659	-0.361786	-0.243697	-0.213797	-0.278178	-0.287299	-0.26546	-0.345578	-0.286759	-0.296383	-0.316806	-0.309574	-0.287446	-0.26006	-0.256086	-0.346747	-0.261452	-0.296228	-0.276722
859	-0.261916	-0.27735	-0.251912	-0.33168	-0.237868	-0.30013	-0.324961	-0.227425	-0.278305	-0.255838	-0.201562	-0.174143	-0.301578	-0.2993	-0.274248	-0.338269	-0.300631	-0.211453	-0.250253	-0.299515	-0.257059	-0.240021	-0.342511	-0.266316	-0.182119	-0.301869	-0.30621	-0.195625	-0.309599	-0.134652	-0.165571	-0.361786	-0.240372	-0.201659	-0.273561	-0.285185	-0.252385	-0.323651	-0.280869	-0.296383	-0.316806	-0.307532	-0.27985	-0.250773	-0.241822	-0.346747	-0.248401	-0.274308	-0.276862
861	-0.251076	-0.28393	-0.236943	-0.313998	-0.232352	-0.286564	-0.324961	-0.222848	-0.279935	-0.235715	-0.210021	-0.155763	-0.286378	-0.29199	-0.271587	-0.334179	-0.299215	-0.204601	-0.237404	-0.299565	-0.249251	-0.234196	-0.342511	-0.251713	-0.175947	-0.301869	-0.295273	-0.184646	-0.318295	-0.127415	-0.152105	-0.358348	-0.236491	-0.190491	-0.265853	-0.288607	-0.238964	-0.305917	-0.269461	-0.293016	-0.312751	-0.305394	-0.268258	-0.240701	-0.229721	-0.341095	-0.233875	-0.25979	-0.276706
863	-0.235919	-0.276082	-0.233004	-0.313067	-0.22694	-0.272007	-0.324961	-0.21667	-0.277703	-0.236443	-0.190417	-0.142508	-0.290519	-0.26092	-0.257276	-0.301283	-0.287831	-0.18125	-0.23497	-0.315118	-0.236437	-0.222415	-0.342511	-0.245791	-0.163901	-0.301869	-0.292865	-0.163746	-0.3049	-0.120847	-0.151631	-0.330702	-0.23203	-0.181251	-0.251996	-0.303043	-0.224853	-0.296523	-0.247079	-0.282948	-0.300628	-0.303064	-0.248717	-0.229068	-0.221924	-0.324202	-0.216414	-0.259996	-0.275965
865	-0.227985	-0.269511	-0.228749	-0.315503	-0.223109	-0.26239	-0.31617	-0.212487	-0.275157	-0.23558	-0.16837	-0.133181	-0.292881	-0.241155	-0.245196	-0.29395	-0.280412	-0.170532	-0.228688	-0.316854	-0.224532	-0.212197	-0.332376	-0.244596	-0.150042	-0.301869	-0.290095	-0.151109	-0.289796	-0.11141	-0.14967	-0.30902	-0.226555	-0.176526	-0.251697	-0.308838	-0.226746	-0.282055	-0.242023	-0.284934	-0.293086	-0.300853	-0.236982	-0.209931	-0.215645	-0.314841	-0.197702	-0.261965	-0.265661
867	-0.23142	-0.26495	-0.223997	-0.32324	-0.221767	-0.260546	-0.293546	-0.211445	-0.27212	-0.232211	-0.142478	-0.130036	-0.292443	-0.23918	-0.23663	-0.326845	-0.279231	-0.179697	-0.216351	-0.296848	-0.214056	-0.204442	-0.30629	-0.250838	-0.133331	-0.301869	-0.286757	-0.151475	-0.272001	-0.0974589	-0.145369	-0.296724	-0.219484	-0.174827	-0.260487	-0.308838	-0.23937	-0.264183	-0.248583	-0.295002	-0.288615	-0.298721	-0.23048	-0.185764	-0.210385	-0.310532	-0.178154	-0.265117	-0.248947
869	-0.22263	-0.254829	-0.213527	-0.323292	-0.213282	-0.252615	-0.284427	-0.2029	-0.26952	-0.228835	-0.132056	-0.12759	-0.290979	-0.233771	-0.233009	-0.338269	-0.275791	-0.171843	-0.201485	-0.287766	-0.211599	-0.193261	-0.285265	-0.247739	-0.130134	-0.294205	-0.283876	-0.145046	-0.259414	-0.090692	-0.146362	-0.29747	-0.210456	-0.181821	-0.249139	-0.292985	-0.234392	-0.286869	-0.245011	-0.296383	-0.292413	-0.276873	-0.229854	-0.187502	-0.200831	-0.310836	-0.177418	-0.254371	-0.241396
871	-0.207336	-0.24175	-0.200015	-0.319256	-0.200998	-0.241446	-0.282494	-0.190363	-0.267154	-0.225457	-0.129864	-0.125515	-0.288969	-0.226536	-0.232019	-0.338269	-0.271149	-0.154935	-0.185275	-0.284496	-0.213409	-0.180257	-0.266931	-0.239671	-0.134127	-0.282464	-0.281238	-0.135001	-0.249598	-0.0877472	-0.150172	-0.305154	-0.200388	-0.187791	-0.234611	-0.27495	-0.227166	-0.310895	-0.240168	-0.29478	-0.298334	-0.255002	-0.228427	-0.191266	-0.191271	-0.310663	-0.179181	-0.239652	-0.235704
873	-0.193008	-0.215717	-0.185174	-0.265537	-0.205356	-0.233576	-0.250168	-0.16879	-0.24995	-0.214574	-0.141925	-0.115503	-0.263568	-0.214845	-0.220041	-0.312398	-0.251025	-0.135619	-0.153585	-0.269147	-0.201726	-0.155688	-0.271356	-0.233653	-0.134399	-0.268064	-0.254054	-0.122553	-0.24223	-0.0808113	-0.140428	-0.300727	-0.19009	-0.177206	-0.220251	-0.259248	-0.223741	-0.299749	-0.23768	-0.282138	-0.309814	-0.254556	-0.215058	-0.180609	-0.186377	-0.302165	-0.177547	-0.212803	-0.232775
875	-0.178754	-0.190294	-0.171676	-0.211401	-0.207137	-0.221486	-0.21708	-0.149041	-0.232282	-0.20197	-0.149926	-0.104171	-0.239115	-0.201277	-0.205516	-0.287921	-0.22921	-0.116359	-0.119476	-0.250951	-0.186148	-0.129016	-0.275644	-0.226957	-0.132186	-0.25117	-0.227699	-0.106939	-0.236038	-0.07541	-0.12763	-0.289692	-0.180633	-0.166491	-0.205044	-0.245918	-0.214339	-0.280099	-0.228353	-0.267512	-0.310456	-0.245431	-0.1945	-0.164199	-0.174799	-0.278866	-0.171368	-0.176519	-0.228265
877	-0.164439	-0.172936	-0.164803	-0.175733	-0.190451	-0.188961	-0.192997	-0.141236	-0.218597	-0.18466	-0.13374	-0.090117	-0.228525	-0.181053	-0.183983	-0.280345	-0.206092	-0.0983381	-0.0807705	-0.224828	-0.158486	-0.0975719	-0.269985	-0.216355	-0.120265	-0.224082	-0.215143	-0.0779896	-0.234164	-0.0785822	-0.106573	-0.253747	-0.175077	-0.155574	-0.188518	-0.236284	-0.195629	-0.247204	-0.20837	-0.249796	-0.294216	-0.222787	-0.162746	-0.138827	-0.152808	-0.232515	-0.158113	-0.125539	-0.221293
879	-0.146456	-0.161995	-0.159507	-0.150353	-0.172489	-0.154849	-0.169659	-0.136396	-0.209851	-0.166712	-0.120653	-0.0767767	-0.221725	-0.160873	-0.160686	-0.263943	-0.182808	-0.0837661	-0.0469826	-0.195066	-0.129398	-0.0666647	-0.251167	-0.209037	-0.104951	-0.195225	-0.202131	-0.0516252	-0.228632	-0.0806115	-0.0893049	-0.223681	-0.168515	-0.134548	-0.159189	-0.211342	-0.162246	-0.219258	-0.173897	-0.222854	-0.25672	-0.171916	-0.119575	-0.104025	-0.125804	-0.170169	-0.132851	-0.0790159	-0.20826
881	-0.123904	-0.159045	-0.156178	-0.137789	-0.152936	-0.118762	-0.147251	-0.135248	-0.207258	-0.147968	-0.111426	-0.0643248	-0.219647	-0.140748	-0.135191	-0.236549	-0.159314	-0.0734903	-0.0193199	-0.160771	-0.0985321	-0.0364261	-0.215958	-0.205813	-0.0854116	-0.164163	-0.188548	-0.0284804	-0.218544	-0.0812173	-0.0767552	-0.200939	-0.1607	-0.1082	-0.123118	-0.178341	-0.121138	-0.193917	-0.131795	-0.191056	-0.208032	-0.106184	-0.0703932	-0.0642598	-0.096159	-0.0994018	-0.101267	-0.0348387	-0.192036
883	-0.099132	-0.157585	-0.152291	-0.139495	-0.14045	-0.0841314	-0.131096	-0.136305	-0.20332	-0.145231	-0.100551	-0.0594062	-0.214547	-0.138622	-0.121839	-0.204783	-0.136377	-0.0706296	-0.00884013	-0.142184	-0.0679457	-0.0181373	-0.193769	-0.197007	-0.0683156	-0.145384	-0.170869	-0.0226833	-0.201213	-0.0686063	-0.0789941	-0.195648	-0.151525	-0.0700381	-0.0883335	-0.141926	-0.0941056	-0.146988	-0.0941195	-0.145223	-0.160752	-0.0491644	-0.028106	-0.0318856	-0.0812713	-0.0350451	-0.055524	-0.0274961	-0.167761
885	-0.0734511	-0.156736	-0.148177	-0.147045	-0.130857	-0.050097	-0.1175	-0.138264	-0.198831	-0.149048	-0.089002	-0.057572	-0.20821	-0.143865	-0.113459	-0.171227	-0.113667	-0.0708051	-0.00539595	-0.130028	-0.0374737	-0.00474135	-0.176911	-0.185917	-0.0522202	-0.131635	-0.151513	-0.0239892	-0.180915	-0.0505835	-0.0872882	-0.197501	-0.141793	-0.0342164	-0.0628329	-0.110099	-0.0786066	-0.095443	-0.0648464	-0.101382	-0.123261	-0.0112435	0.00224438	-0.00954229	-0.0731048	0.00353436	-0.0115363	-0.0346582	-0.142279
887	-0.0669813	-0.159003	-0.148151	-0.156212	-0.130377	-0.03406	-0.124846	-0.162285	-0.186231	-0.16459	-0.0769753	-0.0877863	-0.199892	-0.162126	-0.143363	-0.165161	-0.106512	-0.0858795	-0.0443257	-0.139983	-0.0221287	-0.0212543	-0.174491	-0.165368	-0.048885	-0.12479	-0.144782	-0.0655343	-0.142276	-0.0441703	-0.0943411	-0.250483	-0.139127	-0.0134452	-0.0781848	-0.100053	-0.108975	-0.0317878	-0.0712702	-0.0719068	-0.128827	-0.054988	-0.0178797	-0.028989	-0.0891015	-0.0702045	0.0190907	-0.0920128	-0.114573
889	-0.0685849	-0.166566	-0.151055	-0.169336	-0.13022	-0.0267272	-0.133267	-0.181121	-0.17046	-0.180991	-0.0689861	-0.116256	-0.194886	-0.190433	-0.173947	-0.165949	-0.109757	-0.105976	-0.0853367	-0.157269	-0.0190739	-0.0437754	-0.18739	-0.148332	-0.0551386	-0.122619	-0.142368	-0.104915	-0.105674	-0.040495	-0.105328	-0.292169	-0.138214	-0.0193519	-0.102606	-0.109912	-0.144123	-0.0198635	-0.101138	-0.0779846	-0.15554	-0.105137	-0.0558077	-0.0628758	-0.113669	-0.131559	0.0265668	-0.139073	-0.0960083
891	-0.0943911	-0.190827	-0.16299	-0.194997	-0.13031	-0.0457233	-0.143316	-0.181438	-0.145237	-0.199127	-0.0739733	-0.136363	-0.200661	-0.249798	-0.20339	-0.18631	-0.144973	-0.140872	-0.129347	-0.196133	-0.0540853	-0.0829564	-0.248123	-0.143366	-0.0910086	-0.134821	-0.152688	-0.133879	-0.0771882	-0.0445859	-0.129029	-0.293234	-0.142305	-0.0582036	-0.138226	-0.144351	-0.185174	-0.071822	-0.159958	-0.127967	-0.208366	-0.163195	-0.115722	-0.114595	-0.148821	-0.177619	0.00545383	-0.173421	-0.0887324
893	-0.126384	-0.219501	-0.178333	-0.224438	-0.135183	-0.0798681	-0.169045	-0.192358	-0.125062	-0.219594	-0.0932201	-0.157585	-0.227608	-0.288932	-0.227971	-0.220641	-0.180031	-0.175637	-0.173186	-0.234432	-0.0983553	-0.127301	-0.287278	-0.150879	-0.119757	-0.14736	-0.172164	-0.166781	-0.0741773	-0.0621253	-0.148259	-0.297147	-0.144366	-0.103941	-0.176301	-0.188703	-0.216071	-0.130139	-0.202624	-0.178889	-0.236521	-0.207101	-0.163559	-0.154696	-0.181745	-0.227744	-0.0438947	-0.211228	-0.10641
895	-0.164514	-0.252554	-0.197054	-0.257626	-0.1448	-0.129037	-0.210325	-0.213794	-0.109893	-0.242375	-0.126609	-0.179913	-0.275552	-0.308001	-0.247731	-0.268829	-0.21493	-0.210271	-0.216856	-0.272171	-0.151808	-0.176765	-0.305034	-0.170768	-0.141443	-0.160232	-0.200719	-0.203588	-0.0964317	-0.0930024	-0.163056	-0.303884	-0.144414	-0.152469	-0.215371	-0.237073	-0.242852	-0.191033	-0.238742	-0.230192	-0.254676	-0.245271	-0.206502	-0.190088	-0.213765	-0.279515	-0.104689	-0.250436	-0.134202
897	-0.201117	-0.273414	-0.21583	-0.289347	-0.165581	-0.177128	-0.250763	-0.228285	-0.126355	-0.258158	-0.155635	-0.201988	-0.300115	-0.312159	-0.262827	-0.283494	-0.236531	-0.230047	-0.242842	-0.289449	-0.18776	-0.210069	-0.323896	-0.190661	-0.169332	-0.193275	-0.210931	-0.225532	-0.13629	-0.127406	-0.185725	-0.312545	-0.16531	-0.176785	-0.243803	-0.265756	-0.256989	-0.229367	-0.263242	-0.260094	-0.279638	-0.279624	-0.235766	-0.221721	-0.237549	-0.299168	-0.157445	-0.270055	-0.167491
899	-0.236944	-0.290277	-0.234333	-0.32018	-0.189814	-0.224436	-0.290339	-0.240883	-0.152711	-0.271526	-0.183049	-0.223548	-0.317014	-0.312283	-0.276215	-0.288121	-0.254093	-0.245358	-0.262961	-0.300579	-0.218132	-0.238128	-0.342511	-0.210513	-0.199112	-0.232204	-0.216118	-0.242658	-0.181176	-0.162364	-0.210484	-0.322219	-0.192569	-0.199136	-0.266829	-0.290179	-0.267805	-0.266592	-0.284604	-0.284348	-0.301238	-0.310014	-0.261937	-0.252537	-0.259077	-0.318092	-0.204098	-0.286418	-0.199031
901	-0.262872	-0.298302	-0.243607	-0.337041	-0.215535	-0.257254	-0.310641	-0.260626	-0.186882	-0.275982	-0.20152	-0.231179	-0.317014	-0.328782	-0.280527	-0.298708	-0.272232	-0.262863	-0.268048	-0.314681	-0.240796	-0.256137	-0.342511	-0.229015	-0.228819	-0.262637	-0.239491	-0.250755	-0.215137	-0.180724	-0.225339	-0.345421	-0.219934	-0.217166	-0.273562	-0.302651	-0.269096	-0.302082	-0.296941	-0.292393	-0.311644	-0.328146	-0.279381	-0.281062	-0.274102	-0.337245	-0.232041	-0.294007	-0.224596
903	-0.284806	-0.303963	-0.253332	-0.348934	-0.239718	-0.285711	-0.324961	-0.279638	-0.216232	-0.280181	-0.217107	-0.238435	-0.317014	-0.34042	-0.287036	-0.311623	-0.287675	-0.2768	-0.27255	-0.324627	-0.261231	-0.270908	-0.342511	-0.246949	-0.252053	-0.287119	-0.263227	-0.259405	-0.247543	-0.195926	-0.236625	-0.361786	-0.243867	-0.231923	-0.28234	-0.308838	-0.269574	-0.327652	-0.303061	-0.296383	-0.316806	-0.33714	-0.289743	-0.304099	-0.285488	-0.346747	-0.250925	-0.293965	-0.244222
905	-0.29718	-0.303963	-0.26414	-0.348934	-0.260218	-0.303729	-0.324961	-0.296898	-0.234039	-0.283765	-0.22579	-0.24479	-0.317014	-0.34042	-0.298808	-0.330112	-0.296665	-0.282199	-0.27565	-0.324627	-0.27633	-0.27793	-0.342511	-0.263522	-0.259793	-0.297354	-0.287835	-0.269379	-0.276224	-0.203565	-0.239368	-0.361786	-0.259586	-0.243458	-0.293131	-0.308838	-0.269254	-0.343456	-0.303061	-0.296383	-0.316806	-0.33714	-0.293132	-0.321732	-0.293292	-0.346747	-0.260891	-0.286412	-0.258002
907	-0.296312	-0.303963	-0.269092	-0.348934	-0.270938	-0.311678	-0.324961	-0.298679	-0.250955	-0.285499	-0.230317	-0.246217	-0.317014	-0.34042	-0.297016	-0.338269	-0.300631	-0.284431	-0.277061	-0.324627	-0.283546	-0.285093	-0.342511	-0.272857	-0.263851	-0.301869	-0.304475	-0.272903	-0.298885	-0.206761	-0.245309	-0.361786	-0.266727	-0.246742	-0.295634	-0.308838	-0.267689	-0.330604	-0.303061	-0.296383	-0.316806	-0.33714	-0.291135	-0.316142	-0.289141	-0.346747	-0.266021	-0.284434	-0.266741
909	-0.284991	-0.303963	-0.26942	-0.348934	-0.273939	-0.311678	-0.324961	-0.28824	-0.267167	-0.285771	-0.231564	-0.243752	-0.317014	-0.34042	-0.284515	-0.338269	-0.300631	-0.284165	-0.277139	-0.324627	-0.284539	-0.292366	-0.342511	-0.276476	-0.265004	-0.301869	-0.314827	-0.271336	-0.316792	-0.20645	-0.253774	-0.361786	-0.267097	-0.247325	-0.295634	-0.308838	-0.265756	-0.309894	-0.303061	-0.296076	-0.316806	-0.336653	-0.28746	-0.303956	-0.281593	-0.346747	-0.269812	-0.2841	-0.273765
911	-0.284825	-0.296431	-0.270608	-0.348934	-0.275647	-0.311678	-0.324961	-0.294984	-0.273188	-0.295666	-0.231019	-0.24643	-0.317014	-0.34042	-0.282787	-0.338269	-0.300631	-0.271871	-0.276803	-0.324627	-0.285602	-0.284906	-0.342511	-0.280716	-0.266221	-0.301869	-0.316659	-0.27492	-0.319961	-0.214275	-0.252955	-0.343516	-0.269935	-0.241584	-0.295634	-0.308838	-0.264019	-0.313221	-0.303061	-0.286511	-0.316806	-0.321482	-0.282229	-0.304317	-0.280451	-0.346747	-0.277278	-0.282551	-0.275007
913	-0.286661	-0.28825	-0.272032	-0.347297	-0.277636	-0.311678	-0.324961	-0.303549	-0.276646	-0.305143	-0.230429	-0.249903	-0.317014	-0.34042	-0.283455	-0.338269	-0.300631	-0.258099	-0.276358	-0.324627	-0.286397	-0.274919	-0.342511	-0.284287	-0.267209	-0.301869	-0.316659	-0.278995	-0.319961	-0.222079	-0.249767	-0.325189	-0.272838	-0.236274	-0.291165	-0.308838	-0.261255	-0.320948	-0.300292	-0.282614	-0.316806	-0.3153	-0.277293	-0.30286	-0.2767	-0.339832	-0.282598	-0.278739	-0.275448
915	-0.284336	-0.290217	-0.273996	-0.328528	-0.285476	-0.311678	-0.324961	-0.292505	-0.276205	-0.288594	-0.233413	-0.250107	-0.317014	-0.34042	-0.284953	-0.338269	-0.300631	-0.255918	-0.275707	-0.324627	-0.284232	-0.271653	-0.342511	-0.279474	-0.265648	-0.301869	-0.316659	-0.276615	-0.319961	-0.211343	-0.242676	-0.347388	-0.270865	-0.231987	-0.276081	-0.308838	-0.256049	-0.339129	-0.290946	-0.292179	-0.316806	-0.330471	-0.273058	-0.297084	-0.266753	-0.316491	-0.282824	-0.269548	-0.273989
917	-0.281605	-0.291347	-0.27371	-0.32295	-0.286843	-0.311678	-0.324961	-0.289222	-0.275165	-0.276742	-0.235424	-0.248418	-0.317014	-0.34042	-0.284225	-0.338269	-0.300631	-0.259898	-0.274373	-0.324627	-0.27844	-0.268585	-0.342511	-0.276791	-0.262565	-0.301869	-0.316659	-0.274366	-0.316395	-0.204227	-0.237703	-0.361786	-0.269756	-0.22672	-0.261265	-0.300895	-0.24824	-0.335883	-0.285922	-0.287721	-0.307877	-0.32937	-0.263374	-0.286624	-0.256275	-0.302344	-0.275766	-0.250861	-0.273793
919	-0.278127	-0.290936	-0.269271	-0.341719	-0.276263	-0.311678	-0.324961	-0.300267	-0.273019	-0.273559	-0.235642	-0.243236	-0.317014	-0.34042	-0.279389	-0.338269	-0.300631	-0.275248	-0.27178	-0.324627	-0.265956	-0.265882	-0.342511	-0.278041	-0.256671	-0.301869	-0.316659	-0.272359	-0.306246	-0.203789	-0.236636	-0.361786	-0.27024	-0.220684	-0.246659	-0.286722	-0.238389	-0.315827	-0.284291	-0.272262	-0.291942	-0.315504	-0.249415	-0.272489	-0.24538	-0.29541	-0.262994	-0.224724	-0.274588
921	-0.27512	-0.288841	-0.261169	-0.332585	-0.272172	-0.311678	-0.324961	-0.29705	-0.274966	-0.27188	-0.239747	-0.241516	-0.307651	-0.329854	-0.267085	-0.338269	-0.293386	-0.28229	-0.263433	-0.31156	-0.258298	-0.26004	-0.342511	-0.277711	-0.254503	-0.301869	-0.316659	-0.265233	-0.300836	-0.205959	-0.238308	-0.338869	-0.270151	-0.218336	-0.232642	-0.260402	-0.216677	-0.305578	-0.267303	-0.254337	-0.269216	-0.301344	-0.230306	-0.259671	-0.229205	-0.272444	-0.24309	-0.20576	-0.265193
923	-0.272408	-0.285696	-0.25078	-0.306025	-0.272133	-0.311678	-0.324961	-0.284928	-0.27947	-0.271141	-0.246279	-0.241959	-0.29244	-0.31269	-0.250118	-0.338269	-0.281618	-0.284144	-0.251492	-0.290334	-0.253654	-0.252238	-0.342511	-0.276396	-0.254661	-0.301869	-0.316659	-0.25491	-0.298384	-0.209757	-0.241689	-0.301641	-0.269702	-0.215941	-0.218615	-0.233172	-0.192622	-0.295883	-0.246755	-0.236667	-0.245806	-0.284993	-0.210523	-0.245752	-0.211455	-0.246335	-0.221981	-0.189141	-0.252968
925	-0.262172	-0.269464	-0.24164	-0.278087	-0.261616	-0.302023	-0.324961	-0.276994	-0.28038	-0.273208	-0.249488	-0.24183	-0.268098	-0.308828	-0.239872	-0.31841	-0.274459	-0.271786	-0.238312	-0.276741	-0.252251	-0.247327	-0.342511	-0.27644	-0.258785	-0.301869	-0.306324	-0.247326	-0.293736	-0.211209	-0.243465	-0.293502	-0.271825	-0.205007	-0.203207	-0.223173	-0.170433	-0.27041	-0.223202	-0.227023	-0.230222	-0.246749	-0.19508	-0.217627	-0.18906	-0.222996	-0.204097	-0.180926	-0.233934
927	-0.251512	-0.251391	-0.233429	-0.254075	-0.251166	-0.291775	-0.322826	-0.270544	-0.279944	-0.274851	-0.251559	-0.241236	-0.243102	-0.306565	-0.231418	-0.295064	-0.265649	-0.257674	-0.225747	-0.267055	-0.251443	-0.242881	-0.338978	-0.276628	-0.263901	-0.299808	-0.294812	-0.240032	-0.28731	-0.211832	-0.244217	-0.292781	-0.273433	-0.191608	-0.188121	-0.218278	-0.152103	-0.248944	-0.201412	-0.213878	-0.213101	-0.214577	-0.183077	-0.189327	-0.168335	-0.202178	-0.183479	-0.173338	-0.2141
929	-0.244435	-0.233002	-0.229721	-0.254527	-0.249627	-0.28585	-0.308001	-0.269516	-0.27442	-0.271697	-0.24956	-0.238333	-0.221637	-0.302999	-0.228166	-0.267121	-0.243281	-0.244677	-0.217846	-0.274387	-0.251539	-0.238849	-0.314439	-0.276562	-0.271696	-0.285489	-0.284695	-0.232244	-0.272095	-0.209436	-0.240193	-0.312533	-0.269896	-0.173685	-0.173626	-0.222752	-0.140853	-0.23483	-0.182857	-0.19431	-0.193161	-0.193549	-0.177385	-0.160703	-0.150674	-0.185984	-0.157845	-0.166897	-0.192799
931	-0.236847	-0.216268	-0.228029	-0.253986	-0.247072	-0.274769	-0.299046	-0.269054	-0.269431	-0.265125	-0.246683	-0.228513	-0.2057	-0.299495	-0.227519	-0.271203	-0.229687	-0.237708	-0.20912	-0.282713	-0.248782	-0.23586	-0.299534	-0.270367	-0.272899	-0.270024	-0.279278	-0.225461	-0.263114	-0.207983	-0.237292	-0.324721	-0.257057	-0.160911	-0.158441	-0.22327	-0.134411	-0.222111	-0.186663	-0.171549	-0.181434	-0.191137	-0.162512	-0.138887	-0.140286	-0.186259	-0.141302	-0.162297	-0.17305
933	-0.228519	-0.201931	-0.22926	-0.252005	-0.243045	-0.256213	-0.298603	-0.269413	-0.265218	-0.253597	-0.242534	-0.208662	-0.197779	-0.296081	-0.230648	-0.321718	-0.228813	-0.239478	-0.199197	-0.292482	-0.241886	-0.234383	-0.298596	-0.255287	-0.264544	-0.252898	-0.280676	-0.220136	-0.263171	-0.207898	-0.23602	-0.325943	-0.230729	-0.151336	-0.142828	-0.22133	-0.130956	-0.210258	-0.204359	-0.146804	-0.17481	-0.20029	-0.141935	-0.1213	-0.134414	-0.196762	-0.130408	-0.15884	-0.154265
935	-0.224805	-0.203922	-0.224356	-0.24037	-0.230246	-0.245936	-0.308723	-0.259172	-0.252577	-0.237538	-0.23692	-0.206188	-0.209077	-0.292071	-0.235645	-0.306795	-0.219797	-0.239006	-0.195543	-0.282584	-0.229725	-0.223583	-0.284794	-0.247978	-0.254649	-0.237456	-0.254666	-0.224459	-0.253011	-0.208335	-0.225329	-0.316132	-0.22615	-0.137589	-0.156356	-0.201539	-0.149547	-0.19769	-0.186656	-0.144987	-0.19059	-0.207736	-0.152729	-0.127416	-0.149779	-0.208053	-0.143591	-0.165522	-0.145218
937	-0.22334	-0.21387	-0.216461	-0.22403	-0.213173	-0.239692	-0.323992	-0.243765	-0.235829	-0.21927	-0.230592	-0.212182	-0.229739	-0.287771	-0.241551	-0.259983	-0.206814	-0.237441	-0.194942	-0.263103	-0.214998	-0.208241	-0.264722	-0.244456	-0.244004	-0.222833	-0.215301	-0.233483	-0.237873	-0.209027	-0.210048	-0.300944	-0.232169	-0.126577	-0.17109	-0.18525	-0.168229	-0.187796	-0.172634	-0.148989	-0.208568	-0.212881	-0.166293	-0.138835	-0.166889	-0.222132	-0.156449	-0.173771	-0.140263
939	-0.209777	-0.217059	-0.21461	-0.243273	-0.223289	-0.243714	-0.29982	-0.240199	-0.223224	-0.217146	-0.208848	-0.202034	-0.220522	-0.287068	-0.22781	-0.257738	-0.211271	-0.22933	-0.185343	-0.24121	-0.210701	-0.209556	-0.257791	-0.237382	-0.240176	-0.216703	-0.215538	-0.213945	-0.236191	-0.204966	-0.208723	-0.286333	-0.219801	-0.135004	-0.169718	-0.203818	-0.169887	-0.194224	-0.2085	-0.16902	-0.221655	-0.205834	-0.171195	-0.162634	-0.177375	-0.252015	-0.148211	-0.183183	-0.15167
941	-0.197553	-0.218563	-0.213243	-0.261662	-0.229035	-0.245118	-0.278042	-0.237179	-0.213228	-0.215366	-0.191047	-0.192752	-0.210984	-0.285418	-0.214064	-0.259711	-0.214895	-0.221596	-0.177352	-0.228563	-0.207283	-0.210582	-0.254765	-0.229566	-0.235971	-0.212987	-0.217024	-0.196513	-0.233936	-0.200217	-0.207467	-0.276896	-0.207687	-0.142237	-0.168988	-0.215066	-0.170285	-0.201704	-0.234529	-0.193196	-0.231744	-0.20025	-0.176683	-0.176809	-0.184006	-0.270345	-0.142733	-0.190106	-0.159203
943	-0.193925	-0.215187	-0.212176	-0.267055	-0.210046	-0.233326	-0.276431	-0.233142	-0.212499	-0.210601	-0.19311	-0.191275	-0.208223	-0.27903	-0.205599	-0.266459	-0.210498	-0.217125	-0.178189	-0.253382	-0.204546	-0.205964	-0.263738	-0.219757	-0.228429	-0.216594	-0.212801	-0.19517	-0.225775	-0.19401	-0.202727	-0.287909	-0.201543	-0.147745	-0.169185	-0.215745	-0.168862	-0.210701	-0.246357	-0.223355	-0.237502	-0.196778	-0.183016	-0.177089	-0.185072	-0.271993	-0.14124	-0.193432	-0.161142
945	-0.196844	-0.215175	-0.208839	-0.266147	-0.20656	-0.225942	-0.277001	-0.2312	-0.210501	-0.20967	-0.198415	-0.192206	-0.209867	-0.274209	-0.203922	-0.275431	-0.208417	-0.210213	-0.181581	-0.268134	-0.202641	-0.202417	-0.276253	-0.212555	-0.224334	-0.2211	-0.210558	-0.19799	-0.220442	-0.186859	-0.202072	-0.300385	-0.197668	-0.152306	-0.170691	-0.213797	-0.170122	-0.233034	-0.244863	-0.240167	-0.237738	-0.203963	-0.185044	-0.176946	-0.183387	-0.25882	-0.153236	-0.192885	-0.165706
947	-0.207299	-0.219033	-0.20289	-0.257988	-0.220915	-0.223629	-0.280081	-0.23167	-0.207045	-0.213151	-0.207451	-0.195907	-0.21658	-0.271194	-0.210058	-0.286964	-0.209	-0.20049	-0.187912	-0.271299	-0.201693	-0.200102	-0.292842	-0.208353	-0.224204	-0.226642	-0.210594	-0.205599	-0.218364	-0.178622	-0.206118	-0.314547	-0.196406	-0.156408	-0.172833	-0.210573	-0.172683	-0.261837	-0.236904	-0.250502	-0.235295	-0.216319	-0.184983	-0.176598	-0.180367	-0.238456	-0.171777	-0.190459	-0.171543
949	-0.217688	-0.232094	-0.199227	-0.25377	-0.21563	-0.225197	-0.288205	-0.235857	-0.203594	-0.226378	-0.209298	-0.206032	-0.226249	-0.278591	-0.217975	-0.2925	-0.215464	-0.197984	-0.194557	-0.257169	-0.201739	-0.204589	-0.302852	-0.206199	-0.22784	-0.229566	-0.213562	-0.210276	-0.219634	-0.174941	-0.212023	-0.319392	-0.196347	-0.158206	-0.17952	-0.214276	-0.181323	-0.290182	-0.220761	-0.242942	-0.221346	-0.231865	-0.183789	-0.196737	-0.176586	-0.226998	-0.179178	-0.190726	-0.176049
951	-0.228052	-0.248574	-0.196415	-0.251016	-0.203048	-0.228205	-0.298203	-0.241425	-0.200146	-0.243225	-0.208473	-0.218543	-0.237016	-0.289857	-0.226553	-0.295807	-0.224112	-0.198158	-0.201319	-0.236615	-0.202154	-0.211603	-0.310417	-0.204805	-0.232875	-0.231518	-0.217619	-0.213865	-0.222147	-0.172951	-0.218618	-0.320775	-0.196735	-0.160417	-0.18719	-0.218918	-0.190765	-0.305007	-0.207305	-0.229853	-0.207567	-0.244551	-0.185045	-0.217381	-0.172964	-0.21815	-0.184873	-0.193028	-0.179474
953	-0.230459	-0.257025	-0.200031	-0.258026	-0.19885	-0.236676	-0.313544	-0.244872	-0.202871	-0.265097	-0.198733	-0.225548	-0.267675	-0.318824	-0.231302	-0.296251	-0.23868	-0.221865	-0.212192	-0.258462	-0.205483	-0.220166	-0.299104	-0.205076	-0.22736	-0.239904	-0.228149	-0.224592	-0.230797	-0.172096	-0.214658	-0.317424	-0.203614	-0.164879	-0.197552	-0.225453	-0.201778	-0.26639	-0.206657	-0.199594	-0.197511	-0.245059	-0.196316	-0.2346	-0.170177	-0.217284	-0.186756	-0.202674	-0.178973
955	-0.234548	-0.266651	-0.207375	-0.270273	-0.198803	-0.249179	-0.319782	-0.246674	-0.205522	-0.28018	-0.191761	-0.232081	-0.294466	-0.335426	-0.241032	-0.292957	-0.250668	-0.241449	-0.224341	-0.282272	-0.210529	-0.229182	-0.290388	-0.204837	-0.221102	-0.251035	-0.242823	-0.234031	-0.240159	-0.171449	-0.215391	-0.321866	-0.211432	-0.1796	-0.205427	-0.230737	-0.215768	-0.245076	-0.216021	-0.177131	-0.20769	-0.258227	-0.210559	-0.238754	-0.173398	-0.239978	-0.194655	-0.213032	-0.178424
957	-0.243641	-0.279825	-0.225344	-0.297433	-0.210562	-0.273199	-0.299672	-0.243774	-0.207836	-0.275592	-0.192941	-0.237362	-0.309719	-0.316031	-0.265197	-0.278938	-0.2551	-0.248692	-0.240094	-0.310924	-0.220473	-0.239472	-0.289525	-0.203094	-0.212907	-0.269955	-0.269317	-0.239616	-0.251453	-0.171378	-0.229865	-0.34887	-0.221832	-0.206096	-0.210448	-0.234584	-0.233174	-0.243619	-0.236875	-0.163614	-0.241092	-0.285925	-0.228212	-0.227916	-0.183513	-0.289708	-0.209457	-0.224205	-0.177821
959	-0.258836	-0.291487	-0.242819	-0.321998	-0.219047	-0.284716	-0.300545	-0.25542	-0.210207	-0.277502	-0.205186	-0.243794	-0.317014	-0.305789	-0.278368	-0.292081	-0.270267	-0.260889	-0.248539	-0.324627	-0.236175	-0.253922	-0.305161	-0.213842	-0.217542	-0.278691	-0.286376	-0.247063	-0.254981	-0.174916	-0.236441	-0.349982	-0.228594	-0.230201	-0.220301	-0.240543	-0.244031	-0.266173	-0.261835	-0.190508	-0.253733	-0.297658	-0.248235	-0.25581	-0.207193	-0.307917	-0.219181	-0.24118	-0.182302
961	-0.279627	-0.301763	-0.259842	-0.344184	-0.22453	-0.284769	-0.320655	-0.280401	-0.212628	-0.285371	-0.227573	-0.251282	-0.317014	-0.303938	-0.28146	-0.330124	-0.295276	-0.277628	-0.250283	-0.324627	-0.257158	-0.272186	-0.335924	-0.236043	-0.233939	-0.278088	-0.294785	-0.256218	-0.251388	-0.181761	-0.235777	-0.327357	-0.232023	-0.253421	-0.231943	-0.247284	-0.252462	-0.297619	-0.288314	-0.232368	-0.258687	-0.303479	-0.269136	-0.298047	-0.235896	-0.314453	-0.227025	-0.260304	-0.188666
963	-0.292482	-0.303963	-0.26798	-0.338056	-0.245288	-0.296958	-0.324961	-0.284586	-0.215817	-0.295898	-0.236753	-0.261444	-0.317014	-0.320238	-0.282756	-0.338269	-0.300631	-0.282133	-0.255389	-0.324627	-0.271522	-0.282407	-0.342511	-0.243635	-0.247001	-0.278962	-0.305674	-0.259193	-0.25681	-0.196042	-0.236814	-0.324781	-0.248854	-0.258262	-0.252714	-0.270497	-0.259252	-0.326044	-0.296827	-0.24466	-0.277855	-0.309457	-0.280598	-0.296726	-0.247482	-0.314189	-0.246359	-0.258834	-0.206262
965	-0.302639	-0.303963	-0.273474	-0.325599	-0.269175	-0.311153	-0.324961	-0.283263	-0.219559	-0.306587	-0.242701	-0.271934	-0.317014	-0.34042	-0.283554	-0.338269	-0.300631	-0.283364	-0.261325	-0.324627	-0.283402	-0.290064	-0.342511	-0.247808	-0.259705	-0.28032	-0.316659	-0.26095	-0.265321	-0.212158	-0.239094	-0.328512	-0.268325	-0.263152	-0.268236	-0.287725	-0.26431	-0.347122	-0.303061	-0.257309	-0.29246	-0.317349	-0.287501	-0.296255	-0.25661	-0.313984	-0.261541	-0.25852	-0.222046
967	-0.302639	-0.303963	-0.274734	-0.339442	-0.273493	-0.30068	-0.324961	-0.284945	-0.229842	-0.306587	-0.25561	-0.274839	-0.317014	-0.34042	-0.284206	-0.338269	-0.300631	-0.285729	-0.265601	-0.324627	-0.282363	-0.290632	-0.342511	-0.262601	-0.282868	-0.283232	-0.316659	-0.271517	-0.285832	-0.224648	-0.256161	-0.348251	-0.268608	-0.268509	-0.2685	-0.287453	-0.26442	-0.347122	-0.303061	-0.271506	-0.293688	-0.330741	-0.281462	-0.299	-0.258965	-0.314074	-0.264581	-0.261893	-0.232419
969	-0.302639	-0.303963	-0.275117	-0.348934	-0.279008	-0.29679	-0.324961	-0.289432	-0.247563	-0.306587	-0.266765	-0.277177	-0.317014	-0.34042	-0.288156	-0.338269	-0.297844	-0.291213	-0.269914	-0.324627	-0.282154	-0.291276	-0.342511	-0.273352	-0.300454	-0.285507	-0.316659	-0.279275	-0.303529	-0.235044	-0.26952	-0.361786	-0.269211	-0.272761	-0.268239	-0.286024	-0.264493	-0.347122	-0.303061	-0.27836	-0.291836	-0.33714	-0.276834	-0.301804	-0.262388	-0.314019	-0.267108	-0.268629	-0.242607
971	-0.302639	-0.303963	-0.273587	-0.348934	-0.287135	-0.307263	-0.324961	-0.30004	-0.281514	-0.306587	-0.274092	-0.278277	-0.317014	-0.34042	-0.299303	-0.338269	-0.288978	-0.303501	-0.274307	-0.324627	-0.283758	-0.292088	-0.342511	-0.275286	-0.305869	-0.286392	-0.316659	-0.280901	-0.315088	-0.240867	-0.274786	-0.361786	-0.27051	-0.276002	-0.267498	-0.283537	-0.264532	-0.347122	-0.303061	-0.278494	-0.287165	-0.33714	-0.273499	-0.304663	-0.266786	-0.313832	-0.269163	-0.278444	-0.252624
973	-0.302639	-0.303963	-0.273875	-0.348934	-0.290561	-0.311678	-0.324961	-0.304512	-0.295825	-0.306587	-0.278016	-0.279123	-0.317014	-0.34042	-0.304002	-0.338269	-0.29037	-0.308681	-0.276936	-0.324627	-0.285011	-0.292644	-0.342511	-0.27573	-0.314028	-0.28667	-0.316659	-0.281953	-0.313657	-0.253939	-0.278468	-0.361786	-0.273402	-0.275053	-0.267548	-0.294705	-0.266158	-0.334243	-0.303061	-0.26846	-0.283852	-0.33714	-0.271573	-0.304655	-0.273341	-0.312144	-0.276931	-0.28193	-0.256962
975	-0.302639	-0.303963	-0.275488	-0.348934	-0.290561	-0.311678	-0.324961	-0.304512	-0.295825	-0.306587	-0.279461	-0.279782	-0.317014	-0.34042	-0.304002	-0.338269	-0.299236	-0.308681	-0.278279	-0.324627	-0.286009	-0.293014	-0.342511	-0.275088	-0.324187	-0.286507	-0.316659	-0.282587	-0.302759	-0.272292	-0.280996	-0.361786	-0.277455	-0.272945	-0.267814	-0.308234	-0.268176	-0.318721	-0.303061	-0.255997	-0.28121	-0.33714	-0.270155	-0.303585	-0.280193	-0.310298	-0.285807	-0.283609	-0.259467
977	-0.294025	-0.303963	-0.281973	-0.348934	-0.290561	-0.311678	-0.324961	-0.304512	-0.286348	-0.306587	-0.282232	-0.281373	-0.317014	-0.34042	-0.294106	-0.338269	-0.293689	-0.296984	-0.276782	-0.324627	-0.285175	-0.289993	-0.325462	-0.274112	-0.325785	-0.293951	-0.316659	-0.282162	-0.299833	-0.279301	-0.282794	-0.361786	-0.284092	-0.270455	-0.268092	-0.296237	-0.269452	-0.319422	-0.303061	-0.249855	-0.284257	-0.33714	-0.271103	-0.297209	-0.28156	-0.313179	-0.286325	-0.283652	-0.256518
979	-0.285986	-0.303151	-0.287341	-0.346862	-0.290561	-0.311678	-0.324961	-0.304512	-0.276539	-0.306587	-0.285951	-0.282631	-0.317014	-0.34042	-0.282117	-0.338269	-0.285948	-0.284523	-0.274171	-0.324627	-0.283672	-0.286012	-0.306796	-0.273475	-0.324313	-0.301869	-0.316659	-0.281383	-0.297472	-0.283465	-0.284164	-0.361786	-0.290451	-0.269243	-0.26279	-0.281332	-0.270139	-0.306613	-0.293269	-0.243163	-0.28679	-0.323913	-0.270618	-0.288019	-0.281912	-0.310867	-0.284355	-0.283536	-0.253505
981	-0.296209	-0.295552	-0.275755	-0.32747	-0.290561	-0.311678	-0.324961	-0.304512	-0.278743	-0.306587	-0.295518	-0.279659	-0.317014	-0.34042	-0.268081	-0.338269	-0.282361	-0.283936	-0.266688	-0.324627	-0.279428	-0.279291	-0.301224	-0.276185	-0.310535	-0.301869	-0.316659	-0.279301	-0.287386	-0.281564	-0.283088	-0.361786	-0.290451	-0.270817	-0.245327	-0.260087	-0.269544	-0.264354	-0.26213	-0.235271	-0.288207	-0.281848	-0.267006	-0.272697	-0.280052	-0.297231	-0.276963	-0.283071	-0.250354
983	-0.299044	-0.290862	-0.269258	-0.313169	-0.290561	-0.306795	-0.324961	-0.304512	-0.283485	-0.306587	-0.296878	-0.281678	-0.317014	-0.34042	-0.265223	-0.329627	-0.280543	-0.283811	-0.262746	-0.324627	-0.273516	-0.278505	-0.307294	-0.273187	-0.30303	-0.301869	-0.316659	-0.278149	-0.278124	-0.285835	-0.28629	-0.352792	-0.290451	-0.271755	-0.251284	-0.270367	-0.269508	-0.270077	-0.260174	-0.248202	-0.290539	-0.278036	-0.267977	-0.268507	-0.276176	-0.29294	-0.273288	-0.28306	-0.253789
985	-0.289353	-0.291104	-0.271388	-0.3075	-0.290561	-0.293636	-0.324961	-0.304512	-0.292527	-0.306587	-0.284327	-0.292156	-0.317014	-0.34042	-0.281316	-0.306336	-0.281721	-0.284469	-0.264807	-0.324627	-0.264777	-0.287781	-0.333098	-0.260515	-0.30616	-0.301869	-0.316659	-0.278573	-0.270259	-0.300569	-0.296745	-0.328554	-0.290451	-0.272228	-0.274299	-0.303608	-0.269879	-0.31075	-0.279476	-0.2763	-0.293539	-0.302089	-0.272286	-0.272424	-0.270834	-0.295456	-0.272321	-0.28338	-0.26202
987	-0.284694	-0.290821	-0.278171	-0.321352	-0.290561	-0.297195	-0.324961	-0.304512	-0.295825	-0.306587	-0.279466	-0.290203	-0.307825	-0.34042	-0.287052	-0.312635	-0.288914	-0.286831	-0.265852	-0.324627	-0.26717	-0.286268	-0.33086	-0.264769	-0.314066	-0.29637	-0.308251	-0.279413	-0.278186	-0.298312	-0.2946	-0.335109	-0.285517	-0.27073	-0.273059	-0.297672	-0.267626	-0.331699	-0.282744	-0.288324	-0.305077	-0.308433	-0.272645	-0.281595	-0.275156	-0.301586	-0.280921	-0.275031	-0.273558
989	-0.282923	-0.290236	-0.287628	-0.346414	-0.290561	-0.310354	-0.324961	-0.304512	-0.295825	-0.306587	-0.279023	-0.281112	-0.293359	-0.34042	-0.28684	-0.335927	-0.29956	-0.290173	-0.266314	-0.324627	-0.275956	-0.27856	-0.312519	-0.278743	-0.324714	-0.287713	-0.295016	-0.280491	-0.295182	-0.286298	-0.285221	-0.359348	-0.27775	-0.268528	-0.26757	-0.285998	-0.264496	-0.347122	-0.283026	-0.296383	-0.316806	-0.311215	-0.273238	-0.290623	-0.28047	-0.307181	-0.289852	-0.265328	-0.283196
991	-0.281673	-0.29054	-0.288579	-0.348934	-0.290561	-0.311678	-0.324961	-0.304512	-0.287461	-0.306587	-0.290666	-0.277348	-0.282686	-0.34042	-0.286899	-0.338269	-0.300631	-0.290153	-0.259637	-0.309618	-0.278459	-0.275922	-0.304944	-0.28189	-0.315513	-0.294628	-0.294101	-0.27946	-0.299411	-0.283644	-0.28113	-0.361786	-0.277829	-0.263522	-0.264427	-0.287496	-0.258128	-0.347122	-0.28336	-0.296383	-0.316806	-0.311852	-0.281966	-0.290256	-0.27899	-0.302647	-0.286602	-0.257831	-0.271769
993	-0.28119	-0.290845	-0.287298	-0.348934	-0.290561	-0.310158	-0.324961	-0.304512	-0.281205	-0.304145	-0.301535	-0.273097	-0.272654	-0.34042	-0.286648	-0.334692	-0.300631	-0.289446	-0.253122	-0.296426	-0.278565	-0.273632	-0.300368	-0.283164	-0.305016	-0.30032	-0.294486	-0.27637	-0.301474	-0.282014	-0.277818	-0.361786	-0.278141	-0.26017	-0.263779	-0.292798	-0.253985	-0.347122	-0.283197	-0.291841	-0.310764	-0.311308	-0.284794	-0.290943	-0.273698	-0.297996	-0.28056	-0.252808	-0.263781
995	-0.284329	-0.290652	-0.279467	-0.348934	-0.290561	-0.300868	-0.324961	-0.304512	-0.290504	-0.28922	-0.301535	-0.263305	-0.263731	-0.34042	-0.284655	-0.312827	-0.300631	-0.287151	-0.251515	-0.301107	-0.270008	-0.270217	-0.304973	-0.28105	-0.29924	-0.290852	-0.294469	-0.263963	-0.29976	-0.280264	-0.275469	-0.361786	-0.275159	-0.259624	-0.267363	-0.304549	-0.253614	-0.347122	-0.282192	-0.279594	-0.294476	-0.308764	-0.277615	-0.293419	-0.261941	-0.293147	-0.269786	-0.251985	-0.261625
997	-0.285718	-0.288508	-0.274005	-0.340199	-0.290561	-0.295333	-0.324961	-0.299517	-0.295825	-0.279855	-0.296361	-0.255567	-0.259221	-0.329674	-0.276845	-0.30967	-0.295565	-0.283886	-0.250367	-0.308922	-0.263771	-0.265852	-0.31621	-0.279469	-0.292427	-0.282525	-0.292661	-0.254553	-0.297791	-0.276628	-0.273632	-0.351191	-0.272656	-0.258759	-0.260635	-0.299475	-0.25361	-0.333184	-0.271517	-0.274244	-0.279147	-0.302279	-0.268518	-0.295756	-0.254842	-0.287702	-0.26577	-0.251364	-0.261198
999	-0.284764	-0.283757	-0.271713	-0.31978	-0.290561	-0.29482	-0.324961	-0.28784	-0.295825	-0.277925	-0.284268	-0.250576	-0.260613	-0.304555	-0.261254	-0.331535	-0.283723	-0.279322	-0.249832	-0.320929	-0.260636	-0.260216	-0.336317	-0.278601	-0.284228	-0.275725	-0.28846	-0.24915	-0.295483	-0.270471	-0.272481	-0.326425	-0.270793	-0.257712	-0.24798	-0.284731	-0.253817	-0.311234	-0.255284	-0.272859	-0.264368	-0.293529	-0.258319	-0.298012	-0.25042	-0.281915	-0.265639	-0.25086	-0.261763
1001	-0.267143	-0.272514	-0.2697	-0.304916	-0.285593	-0.301445	-0.324961	-0.284695	-0.295825	-0.277973	-0.276329	-0.245869	-0.256213	-0.294621	-0.261469	-0.338269	-0.276086	-0.256827	-0.239212	-0.312896	-0.256973	-0.257335	-0.342511	-0.278462	-0.272906	-0.260903	-0.285145	-0.246362	-0.293094	-0.268199	-0.259182	-0.302621	-0.269043	-0.249986	-0.243271	-0.258414	-0.252027	-0.287855	-0.248185	-0.274678	-0.261673	-0.270522	-0.254192	-0.277854	-0.246451	-0.285967	-0.262017	-0.236444	-0.260755
1003	-0.242102	-0.258381	-0.267811	-0.292523	-0.278415	-0.311248	-0.324961	-0.285348	-0.295825	-0.278901	-0.270238	-0.241289	-0.249234	-0.291445	-0.268719	-0.338269	-0.270321	-0.226351	-0.224102	-0.295943	-0.253075	-0.25568	-0.342511	-0.278647	-0.260196	-0.242511	-0.282225	-0.244736	-0.290669	-0.267656	-0.240476	-0.279245	-0.267343	-0.241931	-0.242723	-0.239762	-0.24936	-0.271529	-0.243305	-0.272551	-0.258991	-0.254039	-0.252547	-0.257331	-0.240889	-0.290236	-0.255091	-0.223021	-0.258517
1005	-0.257742	-0.259916	-0.256461	-0.290989	-0.273833	-0.311678	-0.303522	-0.277607	-0.284105	-0.275685	-0.268926	-0.23935	-0.262817	-0.29373	-0.276779	-0.317677	-0.259166	-0.234033	-0.225641	-0.289144	-0.246701	-0.241647	-0.310059	-0.257376	-0.279827	-0.256254	-0.289646	-0.234852	-0.295931	-0.263134	-0.23803	-0.294648	-0.268092	-0.236025	-0.25893	-0.267038	-0.243347	-0.29217	-0.244543	-0.248356	-0.249422	-0.279193	-0.260135	-0.247823	-0.226897	-0.289963	-0.233241	-0.222675	-0.250886
1007	-0.268666	-0.25969	-0.245877	-0.290581	-0.266895	-0.307772	-0.290983	-0.270367	-0.273719	-0.272486	-0.263242	-0.236616	-0.271171	-0.296001	-0.277639	-0.296164	-0.24974	-0.240504	-0.226239	-0.285089	-0.242023	-0.229849	-0.282008	-0.239569	-0.287663	-0.267628	-0.294739	-0.226879	-0.295035	-0.254427	-0.234921	-0.306896	-0.267028	-0.231654	-0.261623	-0.274461	-0.237316	-0.292684	-0.245807	-0.245137	-0.247155	-0.282043	-0.256422	-0.242529	-0.219062	-0.279465	-0.219884	-0.222958	-0.247537
1009	-0.256311	-0.25069	-0.239539	-0.292396	-0.251198	-0.290049	-0.313404	-0.266259	-0.269953	-0.270023	-0.241317	-0.230647	-0.257691	-0.297337	-0.252893	-0.274736	-0.247306	-0.236504	-0.220803	-0.289099	-0.243744	-0.227966	-0.274787	-0.237495	-0.248526	-0.265416	-0.289917	-0.227007	-0.271102	-0.231562	-0.226836	-0.301695	-0.259151	-0.22934	-0.246212	-0.255284	-0.231262	-0.266231	-0.247105	-0.270025	-0.25467	-0.255008	-0.23757	-0.242884	-0.219476	-0.25527	-0.217906	-0.224086	-0.249927
1011	-0.24556	-0.243654	-0.234677	-0.289374	-0.24392	-0.279178	-0.31637	-0.265778	-0.267267	-0.262937	-0.232352	-0.224757	-0.256321	-0.296128	-0.23899	-0.273624	-0.245867	-0.232626	-0.215705	-0.287152	-0.242972	-0.2252	-0.272133	-0.239452	-0.226823	-0.264988	-0.28567	-0.222286	-0.25369	-0.222382	-0.220157	-0.297739	-0.249748	-0.22542	-0.235976	-0.243278	-0.224593	-0.253775	-0.244091	-0.265007	-0.256611	-0.249467	-0.224509	-0.231641	-0.215452	-0.259034	-0.218626	-0.222373	-0.244438
1013	-0.236516	-0.238707	-0.231386	-0.281207	-0.245599	-0.275596	-0.298639	-0.269156	-0.265728	-0.250933	-0.237172	-0.218951	-0.26783	-0.292214	-0.236622	-0.294122	-0.245484	-0.228878	-0.210965	-0.278868	-0.239547	-0.221496	-0.274339	-0.245697	-0.223666	-0.266457	-0.282033	-0.212407	-0.243214	-0.227759	-0.214974	-0.295107	-0.238721	-0.220783	-0.22805	-0.234473	-0.217649	-0.247565	-0.239151	-0.246647	-0.256065	-0.253515	-0.214033	-0.215225	-0.209448	-0.275273	-0.22055	-0.219392	-0.235435
1015	-0.233262	-0.240234	-0.230663	-0.285249	-0.246855	-0.261894	-0.293263	-0.268324	-0.264815	-0.245773	-0.234303	-0.210697	-0.272632	-0.290906	-0.232321	-0.316094	-0.250092	-0.222653	-0.206433	-0.271521	-0.233496	-0.218384	-0.285038	-0.245806	-0.225819	-0.258033	-0.265169	-0.200748	-0.241278	-0.222777	-0.2135	-0.292396	-0.234062	-0.213728	-0.225749	-0.22839	-0.211691	-0.266847	-0.242149	-0.235447	-0.249276	-0.251865	-0.209544	-0.214984	-0.206217	-0.284535	-0.219852	-0.21315	-0.229005
1017	-0.231942	-0.243873	-0.230768	-0.293365	-0.247882	-0.244907	-0.291996	-0.265876	-0.263992	-0.242857	-0.228876	-0.201674	-0.275166	-0.29044	-0.227322	-0.337872	-0.256251	-0.215621	-0.201962	-0.264677	-0.226563	-0.21542	-0.298518	-0.243844	-0.229661	-0.246368	-0.244068	-0.188593	-0.242174	-0.214312	-0.213239	-0.289682	-0.231593	-0.206852	-0.223904	-0.224019	-0.2066	-0.28238	-0.243302	-0.225645	-0.242953	-0.247938	-0.205475	-0.217295	-0.20338	-0.288955	-0.216741	-0.206865	-0.223934
1019	-0.229894	-0.242933	-0.228331	-0.29969	-0.242333	-0.236386	-0.288026	-0.247999	-0.25399	-0.235954	-0.225114	-0.196662	-0.276446	-0.287367	-0.218554	-0.307198	-0.253015	-0.210412	-0.196805	-0.272189	-0.219502	-0.208616	-0.306804	-0.241027	-0.226414	-0.240644	-0.238382	-0.184253	-0.240506	-0.205267	-0.210554	-0.288761	-0.233231	-0.201012	-0.222752	-0.225275	-0.204425	-0.280387	-0.236597	-0.219625	-0.239312	-0.236869	-0.201912	-0.225999	-0.201482	-0.277332	-0.205495	-0.200965	-0.223265
1021	-0.225893	-0.239794	-0.224362	-0.301944	-0.235986	-0.22725	-0.283144	-0.233899	-0.246787	-0.228219	-0.22172	-0.191904	-0.276726	-0.276744	-0.212918	-0.281608	-0.247388	-0.204467	-0.19067	-0.27844	-0.212635	-0.201901	-0.31047	-0.238001	-0.221047	-0.236149	-0.234868	-0.180382	-0.239652	-0.197807	-0.207746	-0.283867	-0.233714	-0.196888	-0.219091	-0.228048	-0.203009	-0.26988	-0.226294	-0.21463	-0.237765	-0.227086	-0.19624	-0.22994	-0.19967	-0.255972	-0.194662	-0.197654	-0.222297
1023	-0.216799	-0.230921	-0.216397	-0.293584	-0.227553	-0.21651	-0.275882	-0.229648	-0.246884	-0.218314	-0.219283	-0.187807	-0.2744	-0.246429	-0.215453	-0.269281	-0.235525	-0.196603	-0.18198	-0.281406	-0.206275	-0.195417	-0.302085	-0.234432	-0.210148	-0.234861	-0.237019	-0.177735	-0.240919	-0.194484	-0.204615	-0.268608	-0.231181	-0.194593	-0.212754	-0.232438	-0.202404	-0.250289	-0.212151	-0.210727	-0.23845	-0.218675	-0.188316	-0.228802	-0.197953	-0.224227	-0.184268	-0.197104	-0.221008
1025	-0.211344	-0.229249	-0.21102	-0.273416	-0.223078	-0.211905	-0.261204	-0.231314	-0.245473	-0.21161	-0.215529	-0.181997	-0.273287	-0.226541	-0.215412	-0.262429	-0.231756	-0.188909	-0.175201	-0.267085	-0.200785	-0.191499	-0.287828	-0.230406	-0.207365	-0.234135	-0.240268	-0.17547	-0.244301	-0.195792	-0.197122	-0.262633	-0.225707	-0.188739	-0.209689	-0.230268	-0.201134	-0.258167	-0.216753	-0.210581	-0.235624	-0.219881	-0.190722	-0.223508	-0.195488	-0.221954	-0.178947	-0.196151	-0.214763
1027	-0.208972	-0.233679	-0.207837	-0.243246	-0.221955	-0.212498	-0.240243	-0.237992	-0.242784	-0.207619	-0.210658	-0.174735	-0.273201	-0.215489	-0.213189	-0.260218	-0.234845	-0.18136	-0.17004	-0.238117	-0.196031	-0.189753	-0.268597	-0.225994	-0.211458	-0.233884	-0.244448	-0.173529	-0.249476	-0.201024	-0.185933	-0.264522	-0.217739	-0.181713	-0.207786	-0.225798	-0.199692	-0.274712	-0.227417	-0.211521	-0.231643	-0.224309	-0.196556	-0.216765	-0.192766	-0.229869	-0.175453	-0.195058	-0.206839
1029	-0.208971	-0.227643	-0.210527	-0.256393	-0.224068	-0.226413	-0.235849	-0.223874	-0.234793	-0.208969	-0.202509	-0.168885	-0.274742	-0.212957	-0.214071	-0.259225	-0.228305	-0.184234	-0.166068	-0.226581	-0.182836	-0.190175	-0.273416	-0.221819	-0.218834	-0.235588	-0.233197	-0.182354	-0.243256	-0.192521	-0.174543	-0.262664	-0.214886	-0.176915	-0.210895	-0.214076	-0.202564	-0.243153	-0.217345	-0.197699	-0.229974	-0.227236	-0.198148	-0.205955	-0.189667	-0.258788	-0.18155	-0.193544	-0.19815
1031	-0.209062	-0.218753	-0.213156	-0.276996	-0.226345	-0.241453	-0.235351	-0.205657	-0.225622	-0.21118	-0.194286	-0.162991	-0.276464	-0.211037	-0.215669	-0.259834	-0.219699	-0.187923	-0.162586	-0.219412	-0.169515	-0.190381	-0.283433	-0.218023	-0.224088	-0.237468	-0.219196	-0.191634	-0.233932	-0.180982	-0.162889	-0.261771	-0.212842	-0.175151	-0.211937	-0.206667	-0.203677	-0.223436	-0.207189	-0.18829	-0.226212	-0.225483	-0.197104	-0.192108	-0.185597	-0.272788	-0.182402	-0.188659	-0.192758
1033	-0.202737	-0.205485	-0.19604	-0.257538	-0.220399	-0.228572	-0.233458	-0.19974	-0.217775	-0.207687	-0.195615	-0.151967	-0.275348	-0.189825	-0.2168	-0.277903	-0.214531	-0.168906	-0.161805	-0.214362	-0.181718	-0.180716	-0.285323	-0.218533	-0.190457	-0.2354	-0.218213	-0.17231	-0.219878	-0.173191	-0.148365	-0.285834	-0.205112	-0.181337	-0.20756	-0.210561	-0.200177	-0.234757	-0.196816	-0.190447	-0.216964	-0.211465	-0.189152	-0.170298	-0.178979	-0.24769	-0.169509	-0.174944	-0.196003
1035	-0.197523	-0.192166	-0.183512	-0.232561	-0.207346	-0.217978	-0.227456	-0.192799	-0.21348	-0.203171	-0.190932	-0.140179	-0.265004	-0.174717	-0.20915	-0.283842	-0.2084	-0.152782	-0.157073	-0.205422	-0.188196	-0.170163	-0.28275	-0.214264	-0.162477	-0.232741	-0.214689	-0.152379	-0.20898	-0.166271	-0.13483	-0.284225	-0.199068	-0.16911	-0.200328	-0.204984	-0.191259	-0.23026	-0.182225	-0.189981	-0.213771	-0.200863	-0.180982	-0.15159	-0.170202	-0.228111	-0.155895	-0.16293	-0.194785
1037	-0.194525	-0.178747	-0.180138	-0.196577	-0.180117	-0.211946	-0.213258	-0.183813	-0.216271	-0.196613	-0.174256	-0.126869	-0.236248	-0.171785	-0.183981	-0.265584	-0.200346	-0.142427	-0.14446	-0.188722	-0.183252	-0.157841	-0.271274	-0.200462	-0.145772	-0.228903	-0.206094	-0.131238	-0.204379	-0.161091	-0.123269	-0.231399	-0.196389	-0.141216	-0.190668	-0.191349	-0.177733	-0.212303	-0.164045	-0.187282	-0.215731	-0.193167	-0.172625	-0.135521	-0.159588	-0.213227	-0.141668	-0.152364	-0.18977
1039	-0.178137	-0.157903	-0.172091	-0.17284	-0.175839	-0.20067	-0.205663	-0.161678	-0.211735	-0.175646	-0.164857	-0.10914	-0.202037	-0.159027	-0.15726	-0.232036	-0.189247	-0.124107	-0.117359	-0.167457	-0.172308	-0.138039	-0.237747	-0.195677	-0.134317	-0.216742	-0.200142	-0.105875	-0.199993	-0.148148	-0.112332	-0.196444	-0.191626	-0.126662	-0.16287	-0.157724	-0.159886	-0.190496	-0.151646	-0.172808	-0.208612	-0.176328	-0.153616	-0.1247	-0.139559	-0.191766	-0.130769	-0.123906	-0.181128
1041	-0.152753	-0.132069	-0.160903	-0.157334	-0.186984	-0.18587	-0.202505	-0.130707	-0.202276	-0.144995	-0.160348	-0.0884414	-0.164161	-0.139665	-0.129496	-0.188215	-0.1761	-0.100435	-0.0805211	-0.143126	-0.157331	-0.113211	-0.189402	-0.196951	-0.126392	-0.198988	-0.195965	-0.0776732	-0.195754	-0.129989	-0.101813	-0.173496	-0.185463	-0.115597	-0.130149	-0.118713	-0.140635	-0.168074	-0.139019	-0.155159	-0.197872	-0.157742	-0.130597	-0.11286	-0.116154	-0.169041	-0.119934	-0.0896542	-0.171498
1043	-0.118676	-0.0708481	-0.135627	-0.110042	-0.167973	-0.143546	-0.169828	-0.0654191	-0.189286	-0.0890418	-0.144669	-0.0521629	-0.0895202	-0.0904185	-0.108964	-0.160658	-0.134355	-0.0560812	-0.020799	-0.0967386	-0.126426	-0.0632842	-0.12536	-0.186642	-0.106845	-0.167571	-0.169084	-0.0325215	-0.184788	-0.115413	-0.0805682	-0.154756	-0.161614	-0.107876	-0.090449	-0.0725647	-0.116594	-0.150004	-0.104204	-0.133275	-0.167912	-0.145622	-0.0882763	-0.0698457	-0.0779818	-0.150857	-0.0989666	-0.0357842	-0.160417
1045	-0.0814557	0.00188482	-0.105419	-0.047233	-0.143703	-0.0944156	-0.12393	0.00715708	-0.175255	-0.024733	-0.125968	-0.0092531	-0.00383319	-0.0281475	-0.0867094	-0.132419	-0.0846194	-0.00558273	0.0482503	-0.0407044	-0.0897303	-0.00352592	-0.0545204	-0.174185	-0.083212	-0.133353	-0.132489	0.0189392	-0.171111	-0.101906	-0.0555256	-0.13105	-0.133799	-0.0942073	-0.0441931	-0.0234659	-0.0842445	-0.127037	-0.0566784	-0.10757	-0.134842	-0.128455	-0.0370424	-0.0136664	-0.0296775	-0.120917	-0.0742545	0.0314567	-0.145144
1047	-0.0321136	0.115089	-0.0566842	0.0876883	-0.116372	-0.0286408	-0.0192798	0.0922189	-0.157933	0.0693706	-0.0987198	0.0622717	0.117593	0.0911115	-0.0445878	-0.0815373	-0.0112513	0.0645454	0.156476	0.0576281	-0.0306075	0.0964527	0.0459459	-0.159664	-0.0441805	-0.0948635	-0.0538488	0.0952773	-0.146136	-0.0918312	-0.0160826	-0.0684076	-0.0980971	-0.0686073	0.0152152	0.0315523	-0.0352299	-0.094248	0.016348	-0.0741978	-0.0955358	-0.10116	0.0320735	0.0689228	0.0389522	-0.0673911	-0.0420293	0.125521	-0.12146
1049	0.0329974	0.233483	0.00212048	0.250887	-0.0808786	0.0521477	0.0934929	0.170829	-0.135216	0.17508	-0.0672293	0.146999	0.233905	0.225395	0.0219173	-0.0110907	0.0727315	0.146635	0.289943	0.172051	0.0435182	0.212656	0.160148	-0.145329	-0.00593651	-0.044702	0.0369916	0.183993	-0.117672	-0.0693284	0.037474	0.00933033	-0.0577661	-0.0269136	0.10859	0.102055	0.0477104	-0.021919	0.101627	-0.0183797	-0.027301	-0.00869701	0.127038	0.153117	0.138485	0.051721	0.00505046	0.263468	-0.0856965
1051	0.122704	0.359972	0.0766317	0.458192	-0.0326547	0.156354	0.218935	0.239377	-0.104086	0.298893	-0.0291215	0.252319	0.34224	0.383114	0.126454	0.0898718	0.17327	0.247382	0.462778	0.31157	0.141044	0.354164	0.295774	-0.131286	0.0310793	0.0236641	0.146861	0.292015	-0.0837684	-0.0274411	0.113044	0.110612	-0.0102148	0.0256544	0.224916	0.18302	0.153574	0.0771266	0.195185	0.0526049	0.0604802	0.1278	0.239468	0.238397	0.258898	0.215149	0.0621674	0.431066	-0.0417717
1053	0.228904	0.468441	0.159223	0.654178	0.0416401	0.284196	0.322517	0.293859	-0.0559526	0.381966	0.0302946	0.358294	0.395811	0.490316	0.270016	0.208147	0.288111	0.349438	0.643606	0.419043	0.266713	0.492324	0.37235	-0.105079	0.102715	0.131648	0.263947	0.43599	-0.0289674	0.0340745	0.221377	0.297909	0.0568848	0.118834	0.366868	0.298555	0.35058	0.187192	0.339632	0.169693	0.205924	0.306186	0.427812	0.420603	0.42631	0.496779	0.175948	0.651253	0.0290022
1055	0.343797	0.567413	0.246073	0.844198	0.129676	0.424496	0.414577	0.340926	0.00114282	0.443567	0.100941	0.464613	0.420519	0.570893	0.434145	0.335547	0.41049	0.452185	0.828648	0.509628	0.407214	0.628719	0.417803	-0.072461	0.192596	0.260511	0.384838	0.598913	0.0368473	0.105935	0.346978	0.53054	0.134287	0.233856	0.509805	0.416221	0.552366	0.314562	0.495279	0.313255	0.370242	0.503623	0.621406	0.610584	0.592692	0.779187	0.307283	0.854342	0.11343
1057	0.508026	0.605244	0.332598	0.74961	0.225844	0.549476	0.472071	0.379823	0.0739242	0.447992	0.198537	0.510529	0.427507	0.60397	0.542756	0.430716	0.51357	0.525788	0.877877	0.519919	0.558315	0.721115	0.472836	-0.00124402	0.289502	0.381159	0.461365	0.659888	0.144187	0.211798	0.400113	0.580256	0.203357	0.45584	0.630644	0.509693	0.684511	0.5506	0.671758	0.589978	0.601457	0.787031	0.765874	0.74534	0.698701	0.933336	0.497411	0.878255	0.263063
1059	0.657532	0.626132	0.406696	0.635497	0.31728	0.669964	0.522198	0.407143	0.149859	0.437399	0.296587	0.534626	0.417539	0.615019	0.615895	0.503408	0.603975	0.580395	0.888754	0.516559	0.694642	0.788958	0.506171	0.0848178	0.381665	0.488589	0.524074	0.693594	0.257619	0.313604	0.437309	0.582978	0.274853	0.656039	0.688479	0.564793	0.705734	0.727948	0.751441	0.798367	0.711159	0.928221	0.824589	0.804307	0.73083	0.946608	0.679567	0.819277	0.419168
1061	0.722041	0.595504	0.425528	0.546097	0.384428	0.776451	0.553064	0.38607	0.233694	0.382318	0.386085	0.485187	0.338953	0.546528	0.552723	0.488561	0.645458	0.561773	0.782004	0.483879	0.760957	0.764636	0.439038	0.221894	0.449929	0.540324	0.542606	0.645775	0.381906	0.38398	0.431909	0.448048	0.360428	0.822037	0.647401	0.559652	0.552822	0.813159	0.67916	0.899476	0.630096	0.84614	0.74868	0.744291	0.646971	0.738714	0.849207	0.630165	0.585433
1063	0.722126	0.528436	0.425939	0.455012	0.432125	0.811396	0.557646	0.3516	0.326774	0.323543	0.43817	0.4218	0.251973	0.453228	0.451109	0.45219	0.637729	0.515871	0.647158	0.433048	0.757009	0.699299	0.357022	0.345668	0.487399	0.586179	0.538924	0.564198	0.498096	0.421969	0.412502	0.317589	0.416196	0.797503	0.548604	0.498461	0.384435	0.793098	0.527336	0.824655	0.474813	0.665488	0.604743	0.618059	0.519024	0.521107	0.850524	0.446354	0.646125
1065	0.64265	0.416366	0.4036	0.361847	0.455802	0.757991	0.529766	0.300587	0.431273	0.260207	0.444053	0.341191	0.154628	0.329288	0.302021	0.389234	0.569226	0.436276	0.477614	0.3598	0.666288	0.583312	0.256625	0.453014	0.486841	0.624774	0.507809	0.440931	0.604287	0.41996	0.375799	0.192651	0.435154	0.671826	0.419167	0.407516	0.207833	0.717152	0.333288	0.656443	0.28013	0.43251	0.424694	0.456675	0.367673	0.298346	0.762487	0.265357	0.650774
1067	0.503051	0.292192	0.342939	0.259235	0.450672	0.639491	0.459877	0.241282	0.47697	0.198729	0.392355	0.273177	0.0740938	0.215131	0.178688	0.288399	0.442304	0.35028	0.324747	0.269705	0.53193	0.446089	0.146451	0.457003	0.448482	0.587818	0.44005	0.335256	0.631602	0.389002	0.331999	0.0976953	0.403874	0.507331	0.284221	0.271992	0.0956303	0.543263	0.170153	0.418811	0.12482	0.250096	0.265453	0.335628	0.24208	0.152063	0.60316	0.139387	0.54753
1069	0.339088	0.163113	0.266749	0.152794	0.433869	0.494614	0.372963	0.178617	0.498838	0.138004	0.317323	0.210266	0.000372033	0.104939	0.0657914	0.172213	0.291707	0.261689	0.178638	0.172784	0.379888	0.300261	0.0323141	0.419106	0.394805	0.520245	0.357441	0.23671	0.626953	0.346313	0.285323	0.014889	0.352236	0.350631	0.156542	0.138729	0.00138746	0.360417	0.0262614	0.193124	-0.00977007	0.0920521	0.121379	0.2308	0.129607	0.0241629	0.442235	0.0280303	0.42944
1071	0.199784	0.0657595	0.184814	0.0345748	0.357881	0.3377	0.249102	0.127382	0.438559	0.0853888	0.265695	0.181378	-0.0547253	0.0497543	0.0182498	0.0690964	0.149289	0.202665	0.0930302	0.0801643	0.255893	0.189105	-0.0570321	0.312731	0.336413	0.378462	0.252855	0.193991	0.512134	0.306988	0.247449	-0.0236421	0.266325	0.244867	0.0638833	0.0337846	-0.0380148	0.176971	-0.043388	0.0495307	-0.0668978	0.0233843	0.0372606	0.182737	0.0658456	-0.0518961	0.303079	-0.0397745	0.288231
1073	0.0841044	-0.0198727	0.110392	-0.0731606	0.277747	0.191437	0.125807	0.0832012	0.364676	0.0369358	0.224032	0.158096	-0.105287	0.00648948	-0.0239669	-0.0186966	0.0280929	0.152852	0.0200437	-0.00563772	0.145985	0.094289	-0.134535	0.209612	0.286729	0.235046	0.153245	0.156322	0.388698	0.273616	0.214283	-0.0558646	0.183858	0.169909	-0.00491134	-0.0374788	-0.0649898	0.0312061	-0.0934356	-0.0483673	-0.105238	-0.0304222	-0.0252947	0.144476	0.020746	-0.106391	0.195139	-0.0863601	0.162583
1075	0.0412956	-0.0708775	0.0602122	-0.146772	0.18913	0.079848	0.00720751	0.060466	0.254162	0.00102737	0.212088	0.14989	-0.14295	-0.00334833	-0.0544514	-0.0589912	-0.0265423	0.129887	-0.0177238	-0.0701899	0.0784866	0.0484939	-0.176483	0.122182	0.264995	0.0922788	0.0711171	0.130261	0.246622	0.258829	0.195336	-0.0715854	0.11499	0.133283	-0.044012	-0.0668334	-0.0765017	-0.0676755	-0.119093	-0.0894084	-0.120201	-0.0657372	-0.0610198	0.118411	-0.00113391	-0.134053	0.12604	-0.106543	0.0562984
1077	0.0124909	-0.102502	0.0237881	-0.185521	0.117789	0.00195701	-0.0796029	0.0403876	0.152156	-0.0296996	0.203773	0.137745	-0.166015	-0.0263549	-0.0771526	-0.110158	-0.0683222	0.108565	-0.0480722	-0.105604	0.0260351	0.0117161	-0.216516	0.0573666	0.256813	-0.0162509	0.0100837	0.109294	0.135227	0.249722	0.181807	-0.103248	0.0697569	0.118934	-0.0738165	-0.0954193	-0.0833065	-0.108445	-0.124922	-0.11888	-0.148414	-0.0873998	-0.0894583	0.104405	-0.0143656	-0.150567	0.0989886	-0.114828	-0.0119248
1079	-0.00254283	-0.115069	0.000891169	-0.189987	0.0634372	-0.0427964	-0.135153	0.0229217	0.0585141	-0.0553314	0.199027	0.121724	-0.174727	-0.062311	-0.0922	-0.172015	-0.0974606	0.0888583	-0.071125	-0.112366	-0.0116203	-0.0161944	-0.254667	0.0147891	0.26196	-0.091113	-0.0302063	0.0933363	0.0540043	0.2462	0.173607	-0.150586	0.0477663	0.113698	-0.0998184	-0.123691	-0.0881859	-0.125444	-0.12264	-0.14362	-0.182046	-0.103478	-0.114916	0.0953309	-0.0240598	-0.16252	0.0891371	-0.118246	-0.0645785
1081	-0.0194597	-0.120561	-0.0230182	-0.185512	0.0379009	-0.0723046	-0.149677	0.00449707	0.0138793	-0.0630724	0.178799	0.120135	-0.183055	-0.0836951	-0.108306	-0.173814	-0.127975	0.0727447	-0.0690967	-0.128864	-0.0348218	-0.0281547	-0.241862	-0.0147161	0.251763	-0.112558	-0.0704962	0.0810643	-0.00398668	0.253376	0.170986	-0.139309	0.0301029	0.099007	-0.0830728	-0.119165	-0.100813	-0.102017	-0.139054	-0.136093	-0.194038	-0.0959318	-0.0972664	0.0846853	-0.0336251	-0.162135	0.069897	-0.115136	-0.0778458
1083	-0.0366077	-0.123167	-0.0461298	-0.177905	0.0211595	-0.095745	-0.151012	-0.013419	-0.0152105	-0.0650295	0.15396	0.122443	-0.189941	-0.099524	-0.123423	-0.158	-0.157174	0.0583883	-0.0588214	-0.147399	-0.0527926	-0.0344426	-0.213678	-0.0390637	0.235854	-0.118738	-0.109768	0.0706852	-0.0535064	0.262742	0.169508	-0.11133	0.0138131	0.0859151	-0.0690907	-0.113666	-0.105858	-0.0807597	-0.145778	-0.133451	-0.198684	-0.0915529	-0.0796888	0.0814782	-0.0365462	-0.15925	0.0557727	-0.105323	-0.0905654
1085	-0.0437603	-0.103409	-0.0364847	-0.157354	0.00765545	-0.0754628	-0.12797	-0.00764887	-0.0213466	-0.0553699	0.130767	0.111248	-0.157416	-0.0808205	-0.0997129	-0.156742	-0.135013	0.0640494	-0.0281456	-0.139311	-0.0448112	-0.0150557	-0.184892	-0.02726	0.187647	-0.149779	-0.118792	0.0835201	-0.0594204	0.24138	0.152051	-0.112011	-0.000424125	0.0787584	-0.0676421	-0.107874	-0.0859517	-0.0699321	-0.119859	-0.149233	-0.181669	-0.0993533	-0.0660561	0.102231	-0.0181976	-0.149416	0.0588431	-0.0746012	-0.104924
1087	-0.0454258	-0.0790514	-0.0290259	-0.125982	-0.00245177	-0.0597917	-0.105291	-0.00449506	-0.0332059	-0.0411263	0.118997	0.10216	-0.128253	-0.0623586	-0.0767396	-0.151248	-0.11611	0.0696851	0.0025095	-0.12568	-0.0313576	0.00761737	-0.160232	-0.0175838	0.146432	-0.167734	-0.117339	0.0933383	-0.0667838	0.22037	0.136635	-0.101192	-0.0127767	0.0814143	-0.0509141	-0.0848147	-0.0586118	-0.055163	-0.0843611	-0.139057	-0.154413	-0.0826889	-0.0370443	0.122491	0.00785116	-0.110796	0.063659	-0.031003	-0.109462
1089	-0.0340893	-0.0437953	-0.0267477	-0.0689679	-0.00450985	-0.0550471	-0.0834771	-0.00754104	-0.0586268	-0.0160206	0.134297	0.0980629	-0.107062	-0.0444694	-0.0555113	-0.135712	-0.104925	0.0752608	0.0331159	-0.0989178	-0.00493706	0.0380775	-0.145348	-0.0129492	0.121784	-0.154682	-0.0910547	0.096008	-0.0775816	0.200194	0.126054	-0.0631221	-0.0206635	0.0938029	-0.0190312	-0.0446278	-0.0238989	-0.0364846	-0.0393624	-0.103134	-0.116999	-0.0417587	0.00722123	0.142261	0.0415373	-0.0436214	0.0702061	0.0253671	-0.104259
1091	-0.011828	-0.0152543	-0.0221	-0.0221695	-0.00325174	-0.0363262	-0.0688422	-0.0112346	-0.0686266	-2.65091e-05	0.128851	0.0885244	-0.0943092	-0.0160507	-0.0301695	-0.108214	-0.0863272	0.0751993	0.0648194	-0.0700081	0.0169122	0.062072	-0.120835	-0.0275558	0.104121	-0.132369	-0.0684013	0.107119	-0.0751558	0.181292	0.111293	-0.0309105	-0.0196605	0.110605	0.0142775	-0.0180035	0.0116447	0.0046609	0.000344016	-0.0540588	-0.0613694	0.0150047	0.0508588	0.161737	0.0714776	0.0292791	0.102774	0.0741715	-0.0780115
1093	0.0189835	0.00803114	-0.0155976	0.0166332	0.000601814	-0.00666637	-0.0598263	-0.0154351	-0.0665568	0.00883635	0.10717	0.074727	-0.08816	0.0206089	-0.00160812	-0.071353	-0.0619263	0.0707258	0.0973817	-0.0394181	0.0351838	0.0810061	-0.0887848	-0.0572217	0.0919262	-0.10281	-0.0485894	0.124836	-0.0623805	0.163387	0.0932607	-0.00328391	-0.0116998	0.128885	0.0477587	0.00428098	0.0468053	0.0526773	0.0382475	-0.000922259	-0.000480435	0.0756288	0.0937444	0.180694	0.099616	0.102587	0.143207	0.119765	-0.0451779
1095	0.0392608	0.00870179	-0.0165787	0.0182365	0.00150759	0.0189316	-0.0442705	-0.0307367	-0.0541273	-0.00254377	0.0836436	0.0514592	-0.0862526	0.035883	0.0186623	-0.0400136	-0.0306938	0.0605901	0.113602	-0.0185924	0.0576462	0.0910386	-0.063896	-0.0650779	0.0798576	-0.0755156	-0.0198056	0.127769	-0.0349858	0.136595	0.0619406	0.00588253	-0.00894379	0.151331	0.0728224	0.0201513	0.0615774	0.101131	0.0701401	0.0537041	0.0507935	0.105122	0.11868	0.185889	0.106659	0.132966	0.181157	0.136469	-0.00714392
1097	0.0552107	0.0034111	-0.0196391	0.00976163	0.00164131	0.0428302	-0.0265098	-0.0489812	-0.0397924	-0.0192589	0.0596253	0.025504	-0.0851869	0.0434545	0.0341954	-0.0124264	0.00123171	0.0484532	0.123433	-0.00256817	0.0797706	0.0984196	-0.0430818	-0.0654697	0.0670438	-0.0493309	0.00887981	0.123795	-0.00491308	0.106702	0.0269655	0.00888448	-0.00804445	0.167128	0.0881867	0.0370598	0.0650761	0.142107	0.0950226	0.100031	0.0850333	0.122546	0.135589	0.18041	0.105342	0.151021	0.208593	0.142278	0.0291212
1099	0.0498045	-0.0137979	-0.0277297	-0.0210932	0.000272285	0.0581797	-0.000399413	-0.0732451	-0.0284108	-0.0466313	0.034574	-0.00738801	-0.08354	0.0187024	0.019348	-0.011159	0.0254666	0.0281474	0.103437	-0.0143951	0.0893982	0.0980002	-0.0483335	-0.0368843	0.0463617	-0.0295591	0.0171835	0.0813439	0.0208814	0.0644053	-0.0165651	-0.0110763	-0.0148281	0.166989	0.0803026	0.0564564	0.0415539	0.165162	0.103103	0.126467	0.0784448	0.111044	0.133256	0.149351	0.0839882	0.139536	0.210825	0.121971	0.0611464
1101	0.045715	-0.0255594	-0.0368688	-0.0447759	-0.00414819	0.0675184	0.0174275	-0.0898949	-0.0165686	-0.0654417	0.00434868	-0.0373728	-0.0811005	-0.00618008	-0.00139578	-0.0191838	0.0379255	0.00287646	0.08107	-0.0244069	0.0881756	0.0869525	-0.0481204	-0.012844	0.0205234	-0.0131529	0.0166085	0.0408952	0.0437081	0.021753	-0.0506086	-0.0328307	-0.0218668	0.142833	0.0565206	0.0675878	0.00758879	0.155784	0.081775	0.121167	0.0551219	0.0806807	0.11109	0.097245	0.0559595	0.105129	0.189526	0.0821771	0.0808277
1103	0.0440333	-0.0273596	-0.0479251	-0.055344	-0.0141485	0.0658657	0.0201071	-0.0926215	-0.00388396	-0.0685958	-0.0353379	-0.0620416	-0.077212	-0.0313011	-0.0329218	-0.0442002	0.0288508	-0.0314739	0.0543693	-0.0310992	0.0671123	0.0564698	-0.0379143	0.00288499	-0.0147434	-0.00290121	-0.00020172	0.00410767	0.0611081	-0.0215493	-0.0673039	-0.0578651	-0.0293718	0.0996923	0.0201713	0.0721854	-0.0346315	0.120768	0.0372006	0.0907811	0.0185705	0.0354086	0.073246	0.0285024	0.0226543	0.0526021	0.149625	0.0269781	0.0907512
1105	0.024386	-0.0257352	-0.0521644	-0.0434535	-0.0270382	0.0550422	0.000572803	-0.0985055	0.00697746	-0.0769113	-0.0759108	-0.077826	-0.0675369	-0.0545022	-0.0599148	-0.0437244	0.0185162	-0.055734	0.0265781	-0.0331733	0.0378568	0.0136549	-0.0477192	-0.00180693	-0.0698582	0.00228485	-0.0100054	-0.0250339	0.0640147	-0.0764571	-0.0944669	-0.0821673	-0.0399905	0.0383532	-0.00752789	0.0417004	-0.0665921	0.0505161	-0.0116158	0.064551	-0.0263345	-0.0229546	0.0306773	-0.00811222	-0.00551291	-0.0052974	0.0932942	0.00510922	0.0699556
1107	-0.00637928	-0.0219915	-0.0521852	-0.0176646	-0.041716	0.0385435	-0.0327086	-0.106343	0.0167106	-0.0884209	-0.117032	-0.0881125	-0.0542809	-0.0765152	-0.0841026	-0.027473	0.00740203	-0.0737499	-0.00188797	-0.0323894	0.0035314	-0.0367919	-0.0699076	-0.0191363	-0.137256	0.00433606	-0.0154731	-0.0494438	0.0579521	-0.138547	-0.128108	-0.106017	-0.0525359	-0.0246346	-0.0302475	0.00557338	-0.0937761	-0.0218348	-0.0572797	0.0381127	-0.0708292	-0.080411	-0.0104517	-0.0359519	-0.0308387	-0.0610302	0.0348043	-0.00679262	0.0421877
1109	-0.0351624	-0.00533677	-0.0554261	-0.0013092	-0.0566991	0.0127037	-0.0387295	-0.0728722	-0.012261	-0.0634312	-0.128147	-0.0638561	-0.02826	-0.0286711	-0.086111	-0.0485799	-0.00178156	-0.0443683	0.0201126	-0.00995535	-0.018832	-0.0207431	-0.0470287	-0.0424298	-0.13439	-0.000963553	-0.0312286	-0.0317725	0.0293136	-0.16345	-0.117399	-0.103704	-0.0759702	-0.0636649	-0.0201751	-0.0103075	-0.0939608	-0.0362868	-0.060118	4.59379e-05	-0.0920388	-0.0985986	-0.0256957	-0.044342	-0.0379113	-0.081751	-0.00911616	0.0105791	0.0107509
1111	-0.0548836	0.0238185	-0.0567483	0.0240583	-0.0712159	-0.00708442	-0.0318568	-0.0308458	-0.0421912	-0.0239469	-0.135086	-0.0324549	0.00747389	0.0319351	-0.0791747	-0.0622709	-0.00444807	-0.00711359	0.0586727	0.021558	-0.031593	0.0133057	-0.0136218	-0.0691156	-0.121294	-0.00616352	-0.042591	-0.000172979	-0.00488209	-0.176871	-0.0972951	-0.0931776	-0.0969439	-0.0838145	-0.00035634	-0.00707465	-0.0820285	-0.0461425	-0.0473637	-0.0271774	-0.0991855	-0.104066	-0.0216805	-0.0283045	-0.0236645	-0.0841824	-0.0370537	0.0474962	-0.0176944
1113	-0.0231955	0.115928	-0.0443364	0.109478	-0.0827681	0.0158059	0.0290382	0.028854	-0.0474358	0.0716863	-0.141105	0.0136715	0.0899843	0.112462	-0.0373186	-0.00338609	0.0294629	0.0390636	0.15452	0.0891915	0.00240533	0.100518	0.0460479	-0.110961	-0.103397	-0.00502881	-0.0202276	0.0798974	-0.0538894	-0.152287	-0.0569942	-0.0551162	-0.0950161	-0.0690313	0.0374949	0.0315223	-0.0476773	-0.0474942	-0.00576001	-0.0343384	-0.0803129	-0.0859969	0.0179681	0.032929	0.0300277	-0.0527747	-0.0354197	0.120576	-0.0406048
1115	0.0219646	0.211572	-0.00966957	0.243822	-0.0749279	0.0681234	0.10396	0.0821306	-0.0548361	0.161589	-0.124284	0.0720514	0.185474	0.210321	0.0260553	0.0555241	0.0791474	0.0978498	0.276955	0.170729	0.0560193	0.206304	0.129757	-0.128903	-0.0757012	0.0206259	0.0298646	0.17615	-0.0732103	-0.113271	-0.00702167	0.0077463	-0.0794791	-0.0383809	0.103214	0.0967497	0.0192884	-0.00171209	0.0683308	-0.0199563	-0.0398668	-0.0143113	0.10225	0.113819	0.114558	0.00982982	-0.0034866	0.245956	-0.0406381
1117	0.0864875	0.312297	0.0569834	0.448482	-0.0392157	0.162735	0.19904	0.126175	-0.0653348	0.243256	-0.074637	0.148043	0.299618	0.333092	0.120356	0.114471	0.151503	0.174758	0.437604	0.272251	0.137826	0.338785	0.248016	-0.112492	-0.0339201	0.0815221	0.11981	0.295659	-0.0498642	-0.0535113	0.0568516	0.106255	-0.0443824	0.00220397	0.186381	0.17865	0.106674	0.0735806	0.162762	0.00791376	0.0140865	0.0909437	0.214476	0.207016	0.218396	0.0919667	0.0474169	0.404081	-0.0263479
1119	0.180686	0.389603	0.11709	0.601482	0.0251875	0.27528	0.306595	0.163915	-0.0529471	0.297243	-0.0102722	0.212176	0.369911	0.443969	0.233693	0.191622	0.238712	0.248285	0.590011	0.352707	0.247376	0.461582	0.342381	-0.0837886	0.0254437	0.168635	0.21415	0.407292	0.00310681	0.0123446	0.1113	0.2329	0.0136235	0.0964694	0.305096	0.270592	0.261116	0.199478	0.309302	0.100838	0.140562	0.268451	0.388841	0.344444	0.354573	0.322735	0.150348	0.601609	0.0304839
1121	0.289205	0.455607	0.174036	0.72955	0.103437	0.39648	0.420171	0.198611	-0.0295143	0.337873	0.0611957	0.270588	0.419041	0.549105	0.356219	0.277559	0.333089	0.320179	0.738441	0.422996	0.370314	0.579706	0.425216	-0.0491531	0.0932931	0.2684	0.31061	0.515124	0.070375	0.0811427	0.1612	0.373123	0.0826855	0.207247	0.426216	0.363446	0.420615	0.339585	0.464925	0.218374	0.284687	0.460407	0.568239	0.48357	0.488714	0.578594	0.266224	0.788188	0.101453
1123	0.410354	0.477544	0.213063	0.689294	0.168161	0.523895	0.489636	0.208928	0.0308637	0.329883	0.122145	0.269897	0.400579	0.55601	0.440492	0.362528	0.432258	0.354362	0.795715	0.440136	0.493804	0.643329	0.432346	0.00640708	0.153468	0.374528	0.381777	0.548512	0.159781	0.12653	0.171132	0.41819	0.143637	0.372643	0.532477	0.45349	0.555181	0.523067	0.632007	0.429633	0.474726	0.679345	0.726611	0.59646	0.584057	0.862253	0.416737	0.876826	0.222
1125	0.518277	0.48701	0.245888	0.618606	0.22708	0.642572	0.542011	0.208591	0.0964006	0.30892	0.175665	0.251169	0.375753	0.532063	0.499221	0.429055	0.524572	0.373312	0.817412	0.445943	0.602617	0.687698	0.424783	0.0684731	0.204633	0.475559	0.442148	0.554434	0.256095	0.161431	0.167622	0.419889	0.198624	0.518711	0.594863	0.52642	0.613311	0.695546	0.748666	0.649209	0.627599	0.841365	0.818936	0.640765	0.623106	1.01902	0.547347	0.867992	0.351255
1127	0.570989	0.458788	0.258947	0.471549	0.266664	0.725311	0.538551	0.172651	0.172725	0.249463	0.202696	0.176738	0.343275	0.412104	0.467398	0.423371	0.588719	0.342088	0.722717	0.420868	0.653621	0.670401	0.37892	0.150731	0.222367	0.55493	0.466592	0.471545	0.373865	0.161132	0.121556	0.275613	0.232251	0.636656	0.593406	0.574447	0.560218	0.852014	0.791952	0.880886	0.726392	0.920565	0.815156	0.585274	0.580242	0.99116	0.648994	0.717327	0.49318
1129	0.554718	0.400431	0.248737	0.341793	0.292497	0.754558	0.514094	0.13401	0.243938	0.178935	0.198654	0.0955676	0.293244	0.285236	0.37034	0.391295	0.605098	0.27629	0.577202	0.371119	0.64624	0.602271	0.324973	0.230832	0.211097	0.602189	0.465531	0.354367	0.486767	0.130059	0.0588967	0.129291	0.252829	0.625672	0.49989	0.529118	0.377773	0.843789	0.632577	0.895296	0.629689	0.733496	0.661501	0.433444	0.458488	0.722496	0.645521	0.504897	0.58893
1131	0.459734	0.307689	0.211975	0.231776	0.302638	0.722767	0.465679	0.0922869	0.30932	0.0957736	0.159156	0.00670624	0.223185	0.150484	0.198846	0.329105	0.566972	0.171041	0.373697	0.293214	0.572238	0.47614	0.261802	0.308471	0.166731	0.612807	0.435368	0.198066	0.594114	0.0638709	-0.0226977	-0.0193665	0.258517	0.551595	0.361324	0.438104	0.132029	0.754971	0.374028	0.803385	0.43732	0.416125	0.434504	0.23447	0.29813	0.335995	0.590606	0.262242	0.662084
1133	0.311268	0.166353	0.136176	0.115143	0.275872	0.595715	0.385846	0.0092634	0.350268	0.0213961	0.0754919	-0.0680227	0.132213	0.0250058	0.0542395	0.248626	0.416534	0.055005	0.194541	0.188279	0.433837	0.299638	0.157537	0.293877	0.0681475	0.550082	0.368914	0.0569519	0.620377	-0.0183577	-0.085119	-0.139174	0.218434	0.315675	0.200336	0.276197	-0.00308256	0.536551	0.158748	0.503106	0.200602	0.195523	0.22621	0.0920754	0.132049	0.143147	0.375507	0.11534	0.560074
1135	0.143147	0.00715836	0.046029	-0.003922	0.235543	0.433654	0.294465	-0.0889388	0.382236	-0.0497534	-0.0244041	-0.137558	0.0335548	-0.0970646	-0.0804848	0.161423	0.22482	-0.0649949	0.0243327	0.0734094	0.271767	0.104623	0.0381693	0.245386	-0.0503619	0.460402	0.289122	-0.078581	0.61684	-0.106481	-0.140494	-0.248378	0.16153	0.0912594	0.0511751	0.118329	-0.115318	0.315861	-0.0306965	0.215993	-0.00596176	0.0024891	0.0359568	-0.0324919	-0.0191301	-0.0196214	0.164345	-0.0120512	0.431427
1137	0.0125132	-0.0947614	-0.0400647	-0.0879508	0.145175	0.247905	0.186557	-0.162237	0.33166	-0.120698	-0.0893939	-0.187301	-0.0546152	-0.144805	-0.134374	0.022846	0.0834541	-0.129468	-0.0645285	-0.0384616	0.111679	-0.0173384	-0.0754025	0.136861	-0.135475	0.308895	0.150435	-0.125831	0.432152	-0.159372	-0.174208	-0.266046	0.0521999	-0.0423526	-0.0443862	-0.00377351	-0.166409	0.121857	-0.12853	0.0391999	-0.0794086	-0.106764	-0.087148	-0.101224	-0.108992	-0.115293	0.0131957	-0.0876741	0.244382
1139	-0.100907	-0.17959	-0.117071	-0.15983	0.0513574	0.0776595	0.0719855	-0.224311	0.263424	-0.181512	-0.146698	-0.227273	-0.127485	-0.196152	-0.17972	-0.0943832	-0.0398459	-0.184158	-0.142194	-0.133126	-0.0298249	-0.122315	-0.166092	0.0294079	-0.206182	0.161575	0.0243626	-0.169215	0.257054	-0.207248	-0.205527	-0.277966	-0.0477124	-0.134108	-0.12098	-0.10316	-0.200035	-0.0319149	-0.196114	-0.0875435	-0.148186	-0.176496	-0.165464	-0.161858	-0.171961	-0.177286	-0.0922746	-0.146022	0.0872832
1141	-0.165734	-0.216429	-0.168216	-0.197519	-0.0516422	-0.0480672	-0.0613726	-0.254703	0.145907	-0.213442	-0.18254	-0.23964	-0.156864	-0.258754	-0.201762	-0.150066	-0.112286	-0.211676	-0.188996	-0.178765	-0.118358	-0.179814	-0.191607	-0.0742047	-0.236244	0.026999	-0.0649726	-0.202728	0.111669	-0.241287	-0.230303	-0.274693	-0.120086	-0.177469	-0.175642	-0.176283	-0.213469	-0.139171	-0.228725	-0.156419	-0.211566	-0.200531	-0.191995	-0.213131	-0.203836	-0.20034	-0.144931	-0.184397	-0.0351918
1143	-0.207925	-0.240643	-0.202598	-0.236584	-0.128884	-0.141107	-0.149816	-0.272651	0.0235601	-0.240461	-0.206086	-0.247898	-0.18262	-0.290504	-0.218696	-0.187098	-0.168299	-0.239356	-0.219234	-0.21087	-0.179159	-0.220955	-0.214992	-0.146769	-0.250947	-0.0734731	-0.134076	-0.226435	-0.0120619	-0.260885	-0.250816	-0.278419	-0.174325	-0.205427	-0.20439	-0.215034	-0.221946	-0.184128	-0.236108	-0.187371	-0.23872	-0.219834	-0.209129	-0.237346	-0.220342	-0.218564	-0.178037	-0.214089	-0.11228
1145	-0.229539	-0.25338	-0.22174	-0.276898	-0.182711	-0.204434	-0.197431	-0.279286	-0.103177	-0.263015	-0.218455	-0.252421	-0.205085	-0.294207	-0.230988	-0.207177	-0.209379	-0.267182	-0.234416	-0.230673	-0.21475	-0.247226	-0.23644	-0.191108	-0.251687	-0.142944	-0.184789	-0.241229	-0.11611	-0.267357	-0.267456	-0.288509	-0.212078	-0.227627	-0.223449	-0.240935	-0.228571	-0.205794	-0.234059	-0.204145	-0.252333	-0.237368	-0.22275	-0.251446	-0.231102	-0.234983	-0.203834	-0.240535	-0.172403
1147	-0.237969	-0.266016	-0.236966	-0.288604	-0.213961	-0.233443	-0.232333	-0.282969	-0.169216	-0.265992	-0.239537	-0.252429	-0.221385	-0.283642	-0.238833	-0.229171	-0.229509	-0.273542	-0.239347	-0.250595	-0.232469	-0.256544	-0.254639	-0.212266	-0.251664	-0.189836	-0.216538	-0.244242	-0.172765	-0.267016	-0.270942	-0.285931	-0.23606	-0.245162	-0.233442	-0.262728	-0.229296	-0.213849	-0.231224	-0.21482	-0.246151	-0.24893	-0.23677	-0.251848	-0.237562	-0.257199	-0.217872	-0.244815	-0.195268
1149	-0.242613	-0.277881	-0.250756	-0.292094	-0.238495	-0.253078	-0.262511	-0.285622	-0.216876	-0.263064	-0.261856	-0.251122	-0.234948	-0.270142	-0.244968	-0.250856	-0.243118	-0.273143	-0.241227	-0.269361	-0.244989	-0.260968	-0.271741	-0.226719	-0.252049	-0.229847	-0.24249	-0.24392	-0.215232	-0.265079	-0.270795	-0.279406	-0.255474	-0.257906	-0.239959	-0.279016	-0.228679	-0.223415	-0.228942	-0.225465	-0.24292	-0.260552	-0.244956	-0.252046	-0.240292	-0.268171	-0.230097	-0.245303	-0.214177
1151	-0.242892	-0.276256	-0.257605	-0.286147	-0.251371	-0.270138	-0.26901	-0.284015	-0.227315	-0.248527	-0.264078	-0.248012	-0.228953	-0.273034	-0.241754	-0.25757	-0.240666	-0.254895	-0.237774	-0.266573	-0.250373	-0.259362	-0.284777	-0.232667	-0.263571	-0.2552	-0.255792	-0.240579	-0.231545	-0.267436	-0.268948	-0.263076	-0.259219	-0.256845	-0.236594	-0.279412	-0.224304	-0.23769	-0.228283	-0.236165	-0.248724	-0.272482	-0.236185	-0.251973	-0.232286	-0.246351	-0.237333	-0.235296	-0.222466
1153	-0.243128	-0.269961	-0.26283	-0.283549	-0.259995	-0.281074	-0.271709	-0.282103	-0.235418	-0.244049	-0.265746	-0.244923	-0.220146	-0.279452	-0.237471	-0.268454	-0.237536	-0.240695	-0.234658	-0.256831	-0.253093	-0.259678	-0.290268	-0.236532	-0.2765	-0.272171	-0.263623	-0.238192	-0.245964	-0.269838	-0.267078	-0.252014	-0.263282	-0.247768	-0.232038	-0.267682	-0.218652	-0.244942	-0.225022	-0.239648	-0.255634	-0.268426	-0.228332	-0.241985	-0.221828	-0.227333	-0.242769	-0.221839	-0.226094
1155	-0.243268	-0.253578	-0.26455	-0.288186	-0.259431	-0.278783	-0.266195	-0.279533	-0.238476	-0.261302	-0.266214	-0.241883	-0.205264	-0.293485	-0.23088	-0.288349	-0.232936	-0.23524	-0.232267	-0.232064	-0.250054	-0.264146	-0.279457	-0.2359	-0.292469	-0.27103	-0.259634	-0.237867	-0.256292	-0.272339	-0.265161	-0.252336	-0.268032	-0.231299	-0.226383	-0.244769	-0.211823	-0.245718	-0.219362	-0.236475	-0.263564	-0.249629	-0.221327	-0.222853	-0.209108	-0.210898	-0.246547	-0.205199	-0.225422
1157	-0.236399	-0.241103	-0.251596	-0.290344	-0.260194	-0.267926	-0.264184	-0.278446	-0.245959	-0.254944	-0.26674	-0.237821	-0.193418	-0.298347	-0.225634	-0.286158	-0.227385	-0.233891	-0.224818	-0.221631	-0.244584	-0.262696	-0.273569	-0.230923	-0.295404	-0.261564	-0.25998	-0.230239	-0.254886	-0.259363	-0.264023	-0.250597	-0.26947	-0.218551	-0.225046	-0.222813	-0.20435	-0.268566	-0.214925	-0.236059	-0.254022	-0.231717	-0.217689	-0.21261	-0.210063	-0.202906	-0.242321	-0.199926	-0.223609
1159	-0.224465	-0.231451	-0.228042	-0.290711	-0.261915	-0.250881	-0.264703	-0.278429	-0.256639	-0.231531	-0.267307	-0.23302	-0.183764	-0.296583	-0.22136	-0.268013	-0.221148	-0.235508	-0.213714	-0.221553	-0.237358	-0.256972	-0.271239	-0.222809	-0.288924	-0.246085	-0.263457	-0.217334	-0.245003	-0.235208	-0.263449	-0.247368	-0.268516	-0.207462	-0.224528	-0.202355	-0.196846	-0.293204	-0.210675	-0.236058	-0.239342	-0.215144	-0.214433	-0.205069	-0.21397	-0.197903	-0.236088	-0.196934	-0.221299
1161	-0.223994	-0.227194	-0.219203	-0.273066	-0.262814	-0.237526	-0.267315	-0.277327	-0.263723	-0.227347	-0.265552	-0.226241	-0.177068	-0.262086	-0.216015	-0.239058	-0.218971	-0.227214	-0.207012	-0.231919	-0.227629	-0.248589	-0.257257	-0.216117	-0.263297	-0.232424	-0.243653	-0.217228	-0.231782	-0.248982	-0.259664	-0.243689	-0.245712	-0.208828	-0.216782	-0.206133	-0.192202	-0.233872	-0.203498	-0.229326	-0.218107	-0.220107	-0.200496	-0.202582	-0.202035	-0.206009	-0.233648	-0.177401	-0.215412
1163	-0.224957	-0.222261	-0.213325	-0.250673	-0.262109	-0.227523	-0.269978	-0.276316	-0.267237	-0.228736	-0.262105	-0.220086	-0.172122	-0.225161	-0.210413	-0.214809	-0.216252	-0.219131	-0.200358	-0.241616	-0.217327	-0.239447	-0.241207	-0.208979	-0.238762	-0.220802	-0.220918	-0.219123	-0.219501	-0.265586	-0.254653	-0.240701	-0.221565	-0.209536	-0.20795	-0.206164	-0.181817	-0.198862	-0.19555	-0.21669	-0.200626	-0.221349	-0.187171	-0.20274	-0.188757	-0.204632	-0.224918	-0.158314	-0.20814
1165	-0.220429	-0.203689	-0.209558	-0.216518	-0.249512	-0.239385	-0.26991	-0.277686	-0.246971	-0.246796	-0.248303	-0.22201	-0.177045	-0.21757	-0.204315	-0.245275	-0.203003	-0.227673	-0.187484	-0.230156	-0.206097	-0.228097	-0.225747	-0.196049	-0.251922	-0.223125	-0.209196	-0.218152	-0.219916	-0.248341	-0.244444	-0.244044	-0.219251	-0.208795	-0.196732	-0.197956	-0.158807	-0.21734	-0.185906	-0.191067	-0.191403	-0.214413	-0.175193	-0.208717	-0.172526	-0.182398	-0.202353	-0.140208	-0.197822
1167	-0.217494	-0.191868	-0.205995	-0.195934	-0.239644	-0.24276	-0.263454	-0.276982	-0.230343	-0.254634	-0.243099	-0.223097	-0.181927	-0.215087	-0.193676	-0.261885	-0.191595	-0.233923	-0.17902	-0.21964	-0.195728	-0.220464	-0.205959	-0.186953	-0.268586	-0.217329	-0.205291	-0.217143	-0.218997	-0.244021	-0.239061	-0.246715	-0.216147	-0.207173	-0.185214	-0.181262	-0.141501	-0.219802	-0.169654	-0.176811	-0.168577	-0.198982	-0.163478	-0.193766	-0.164831	-0.167335	-0.192308	-0.125545	-0.188926
1169	-0.217233	-0.191384	-0.202775	-0.198143	-0.23436	-0.23188	-0.246265	-0.272796	-0.219829	-0.245301	-0.252339	-0.222778	-0.186741	-0.221184	-0.175408	-0.255221	-0.183279	-0.236322	-0.177962	-0.210707	-0.186805	-0.219076	-0.178904	-0.184295	-0.291136	-0.197894	-0.214513	-0.216068	-0.215838	-0.261412	-0.241785	-0.248257	-0.211713	-0.204904	-0.173476	-0.158339	-0.128382	-0.21051	-0.148552	-0.1709	-0.135768	-0.177317	-0.151956	-0.163454	-0.163402	-0.157536	-0.191452	-0.113408	-0.181076
1171	-0.212923	-0.196374	-0.200324	-0.221512	-0.23279	-0.228724	-0.24049	-0.27145	-0.217174	-0.24187	-0.248771	-0.223257	-0.189691	-0.218227	-0.166912	-0.251322	-0.180056	-0.238148	-0.182691	-0.200144	-0.185155	-0.222778	-0.168332	-0.188221	-0.297528	-0.192389	-0.217813	-0.216297	-0.203784	-0.268876	-0.242112	-0.253686	-0.209678	-0.202473	-0.170357	-0.163237	-0.131559	-0.210935	-0.140591	-0.157066	-0.115959	-0.17442	-0.150465	-0.170996	-0.159053	-0.164447	-0.184848	-0.126328	-0.163311
1173	-0.206308	-0.204479	-0.198311	-0.25692	-0.233333	-0.229964	-0.24121	-0.27172	-0.218991	-0.241797	-0.237916	-0.224191	-0.191581	-0.21012	-0.163974	-0.248996	-0.179731	-0.239647	-0.190712	-0.188653	-0.187645	-0.229376	-0.16714	-0.195893	-0.294726	-0.19481	-0.217742	-0.217268	-0.186669	-0.270691	-0.241076	-0.261326	-0.209008	-0.200963	-0.169774	-0.174145	-0.138925	-0.213614	-0.13769	-0.142621	-0.102052	-0.176498	-0.15163	-0.186732	-0.155109	-0.174881	-0.177802	-0.1439	-0.144507
1175	-0.203507	-0.21679	-0.196823	-0.243252	-0.230495	-0.233254	-0.256562	-0.273267	-0.219268	-0.238489	-0.248609	-0.226258	-0.198612	-0.214001	-0.174619	-0.229394	-0.182464	-0.254298	-0.199499	-0.193761	-0.186678	-0.231604	-0.180164	-0.186289	-0.293555	-0.203048	-0.21467	-0.21949	-0.188634	-0.269621	-0.249488	-0.264913	-0.209101	-0.207566	-0.176909	-0.191385	-0.155713	-0.219829	-0.156723	-0.135759	-0.117498	-0.190699	-0.159251	-0.211239	-0.159346	-0.188388	-0.176263	-0.160688	-0.132848
1177	-0.202648	-0.228478	-0.197895	-0.227307	-0.227579	-0.236788	-0.27096	-0.274883	-0.218754	-0.234074	-0.260348	-0.228845	-0.206264	-0.224203	-0.187395	-0.20981	-0.186633	-0.26862	-0.207748	-0.201594	-0.186524	-0.233609	-0.19436	-0.175295	-0.29301	-0.211184	-0.210746	-0.223062	-0.192742	-0.269381	-0.258543	-0.26653	-0.210045	-0.214698	-0.184876	-0.204573	-0.17141	-0.225069	-0.177086	-0.136035	-0.140464	-0.201019	-0.169087	-0.230275	-0.169129	-0.199874	-0.179609	-0.174544	-0.126923
1179	-0.209466	-0.234714	-0.211569	-0.226876	-0.22613	-0.240429	-0.272512	-0.276139	-0.215097	-0.225856	-0.265512	-0.233418	-0.214211	-0.259634	-0.203437	-0.199812	-0.196346	-0.274058	-0.212866	-0.214022	-0.19236	-0.236894	-0.206636	-0.166807	-0.29472	-0.215613	-0.204185	-0.232739	-0.197147	-0.274903	-0.265646	-0.260461	-0.214858	-0.222735	-0.194265	-0.210831	-0.185243	-0.22864	-0.199719	-0.148512	-0.176285	-0.204703	-0.182708	-0.239958	-0.188395	-0.207908	-0.191307	-0.183386	-0.130802
1181	-0.218457	-0.239936	-0.228365	-0.240387	-0.225761	-0.24497	-0.271498	-0.283705	-0.209092	-0.222196	-0.270499	-0.239592	-0.220902	-0.282925	-0.215614	-0.207884	-0.208753	-0.276456	-0.216299	-0.217095	-0.203424	-0.244884	-0.213572	-0.167917	-0.293991	-0.217596	-0.198767	-0.243225	-0.199432	-0.279135	-0.269169	-0.26894	-0.22093	-0.225686	-0.201359	-0.212367	-0.196945	-0.237027	-0.212027	-0.169227	-0.195407	-0.212343	-0.196506	-0.240659	-0.202594	-0.205001	-0.205668	-0.198356	-0.143983
1183	-0.23033	-0.243812	-0.249303	-0.272383	-0.226824	-0.250704	-0.267081	-0.299638	-0.199971	-0.224581	-0.275253	-0.247889	-0.225927	-0.290116	-0.222668	-0.239917	-0.22473	-0.274822	-0.217497	-0.207763	-0.221417	-0.259114	-0.21343	-0.181752	-0.290029	-0.216336	-0.194866	-0.254784	-0.198904	-0.281658	-0.267945	-0.296708	-0.228672	-0.225692	-0.207125	-0.211167	-0.207413	-0.248204	-0.218353	-0.194714	-0.204853	-0.222276	-0.210406	-0.236157	-0.213859	-0.195754	-0.221572	-0.216874	-0.162552
1185	-0.237281	-0.248379	-0.247016	-0.278878	-0.230135	-0.26122	-0.26447	-0.304512	-0.193722	-0.241811	-0.27976	-0.252862	-0.249114	-0.288383	-0.221817	-0.265673	-0.229233	-0.269017	-0.223496	-0.210995	-0.228939	-0.267944	-0.248522	-0.195963	-0.288285	-0.218239	-0.203019	-0.255903	-0.213413	-0.280476	-0.267984	-0.312333	-0.242122	-0.228399	-0.20768	-0.223809	-0.206874	-0.235466	-0.212896	-0.191457	-0.198209	-0.21161	-0.208623	-0.23304	-0.211548	-0.213059	-0.222548	-0.200494	-0.177903
1187	-0.242064	-0.253251	-0.234494	-0.274136	-0.234437	-0.273842	-0.262656	-0.304512	-0.188738	-0.265585	-0.284157	-0.25637	-0.280304	-0.282717	-0.217482	-0.288664	-0.228679	-0.261375	-0.231611	-0.219763	-0.231846	-0.274395	-0.29914	-0.210341	-0.287518	-0.221536	-0.216485	-0.252421	-0.234549	-0.277661	-0.268579	-0.322608	-0.258087	-0.231201	-0.212558	-0.233797	-0.206301	-0.224181	-0.207658	-0.187123	-0.193635	-0.204124	-0.207683	-0.233715	-0.210245	-0.229463	-0.22311	-0.187537	-0.191583
1189	-0.262099	-0.252505	-0.232057	-0.259514	-0.248802	-0.265093	-0.269828	-0.304512	-0.200502	-0.274407	-0.280811	-0.256322	-0.273843	-0.282832	-0.228523	-0.288906	-0.236462	-0.262062	-0.235199	-0.24662	-0.229285	-0.274979	-0.291777	-0.212685	-0.295892	-0.21733	-0.24089	-0.254367	-0.242667	-0.27996	-0.273847	-0.306853	-0.264563	-0.232895	-0.242996	-0.221765	-0.212098	-0.234671	-0.210567	-0.194286	-0.209392	-0.225416	-0.22045	-0.25327	-0.22225	-0.225392	-0.230408	-0.213123	-0.198498
1191	-0.277703	-0.253078	-0.23139	-0.253497	-0.261198	-0.259967	-0.278061	-0.302271	-0.212992	-0.281834	-0.277884	-0.258498	-0.267977	-0.28543	-0.237318	-0.286802	-0.241909	-0.263461	-0.237916	-0.269251	-0.22933	-0.276657	-0.283784	-0.214063	-0.3027	-0.217825	-0.261309	-0.259087	-0.244837	-0.284999	-0.278657	-0.289285	-0.268094	-0.239516	-0.261133	-0.222454	-0.21803	-0.251993	-0.213888	-0.205333	-0.224081	-0.238659	-0.232414	-0.271236	-0.234744	-0.229765	-0.235512	-0.230147	-0.204366
1193	-0.275504	-0.259114	-0.235379	-0.279044	-0.265179	-0.270751	-0.288634	-0.292201	-0.225471	-0.286654	-0.277596	-0.268988	-0.269917	-0.295826	-0.235928	-0.279955	-0.237927	-0.266077	-0.238275	-0.27437	-0.239315	-0.283051	-0.282404	-0.213897	-0.302648	-0.235892	-0.266134	-0.272677	-0.2282	-0.298839	-0.28115	-0.26934	-0.262781	-0.252786	-0.262665	-0.240319	-0.224146	-0.278539	-0.217767	-0.221623	-0.237329	-0.241037	-0.243293	-0.287057	-0.247898	-0.245539	-0.237654	-0.235611	-0.208822
1195	-0.273705	-0.261353	-0.246355	-0.292074	-0.269054	-0.279931	-0.292271	-0.291933	-0.239459	-0.284075	-0.273212	-0.274983	-0.265572	-0.30062	-0.241352	-0.279285	-0.240634	-0.267194	-0.238294	-0.279222	-0.247019	-0.28793	-0.278846	-0.218551	-0.309116	-0.246146	-0.267647	-0.278331	-0.218812	-0.305943	-0.281197	-0.266007	-0.26405	-0.255861	-0.264593	-0.24439	-0.227704	-0.270174	-0.22517	-0.241317	-0.242668	-0.239451	-0.241965	-0.283307	-0.252699	-0.26714	-0.243535	-0.235897	-0.213263
1197	-0.272327	-0.25959	-0.2647	-0.291903	-0.272816	-0.287417	-0.288596	-0.302003	-0.255041	-0.273692	-0.26451	-0.276235	-0.254599	-0.299507	-0.253963	-0.285131	-0.250397	-0.26673	-0.237957	-0.283791	-0.252318	-0.291212	-0.27299	-0.228289	-0.322461	-0.248159	-0.265665	-0.275617	-0.217071	-0.305943	-0.278662	-0.280194	-0.27226	-0.254348	-0.266701	-0.242254	-0.230112	-0.246098	-0.234159	-0.262545	-0.244447	-0.23608	-0.235143	-0.270749	-0.253742	-0.291362	-0.251099	-0.233853	-0.217696
1199	-0.274951	-0.26076	-0.268124	-0.285219	-0.273945	-0.289282	-0.27989	-0.304512	-0.258272	-0.268441	-0.268768	-0.276135	-0.258689	-0.298404	-0.258723	-0.283378	-0.263296	-0.27299	-0.243384	-0.281806	-0.254577	-0.291591	-0.279218	-0.231673	-0.318163	-0.248102	-0.271723	-0.269205	-0.223843	-0.305943	-0.279523	-0.290047	-0.27451	-0.253978	-0.262608	-0.24293	-0.238159	-0.247901	-0.234448	-0.253437	-0.241815	-0.241146	-0.234746	-0.261073	-0.253405	-0.290452	-0.256562	-0.233434	-0.224906
1201	-0.27885	-0.263014	-0.266635	-0.276647	-0.274221	-0.289276	-0.269679	-0.304512	-0.257506	-0.265038	-0.277268	-0.275612	-0.267738	-0.297324	-0.260848	-0.279039	-0.276852	-0.281431	-0.250616	-0.277629	-0.255861	-0.291017	-0.289478	-0.232969	-0.308146	-0.247567	-0.280282	-0.26179	-0.233398	-0.305943	-0.281646	-0.29819	-0.274709	-0.253775	-0.259831	-0.247217	-0.244669	-0.249991	-0.23283	-0.244134	-0.240219	-0.249472	-0.236492	-0.253192	-0.252544	-0.284164	-0.26056	-0.234369	-0.230634
1203	-0.279332	-0.272408	-0.267612	-0.28577	-0.275929	-0.288962	-0.270093	-0.304512	-0.263302	-0.271245	-0.282064	-0.276763	-0.27423	-0.29741	-0.261041	-0.270431	-0.2654	-0.286647	-0.250796	-0.272376	-0.259444	-0.291113	-0.301241	-0.235497	-0.306919	-0.260648	-0.27792	-0.269011	-0.240276	-0.305943	-0.292637	-0.288514	-0.270202	-0.253976	-0.262858	-0.263979	-0.244678	-0.24861	-0.225883	-0.239409	-0.243108	-0.268031	-0.24481	-0.251254	-0.250038	-0.262943	-0.259667	-0.239883	-0.23056
1205	-0.279127	-0.278723	-0.268642	-0.2946	-0.276172	-0.288175	-0.271922	-0.304512	-0.267997	-0.280684	-0.288097	-0.278195	-0.278755	-0.296568	-0.261436	-0.264003	-0.256067	-0.290259	-0.249544	-0.269889	-0.264545	-0.291479	-0.30722	-0.242014	-0.309212	-0.270603	-0.276467	-0.272209	-0.245631	-0.305943	-0.300558	-0.279662	-0.267224	-0.255043	-0.266769	-0.264188	-0.242742	-0.24127	-0.223227	-0.238011	-0.245286	-0.280177	-0.249034	-0.252418	-0.248527	-0.258271	-0.259234	-0.245155	-0.230055
1207	-0.277148	-0.277094	-0.269809	-0.302674	-0.272634	-0.286166	-0.2774	-0.304512	-0.269854	-0.298467	-0.297323	-0.280351	-0.278198	-0.293334	-0.262355	-0.263201	-0.252205	-0.289732	-0.244595	-0.274544	-0.273564	-0.292542	-0.298272	-0.258827	-0.320591	-0.27249	-0.27736	-0.265021	-0.247056	-0.305943	-0.300558	-0.272936	-0.268196	-0.257039	-0.271632	-0.246607	-0.238717	-0.227527	-0.225182	-0.240188	-0.246699	-0.285428	-0.24886	-0.256916	-0.248087	-0.271385	-0.259295	-0.250165	-0.229086
1209	-0.277119	-0.270681	-0.269303	-0.302499	-0.269007	-0.281668	-0.281117	-0.304512	-0.271443	-0.306587	-0.301535	-0.282045	-0.277787	-0.293518	-0.262313	-0.26186	-0.25287	-0.2955	-0.248288	-0.28179	-0.277957	-0.291415	-0.281485	-0.267343	-0.325785	-0.273021	-0.281262	-0.260045	-0.246043	-0.305943	-0.294273	-0.277331	-0.271667	-0.260664	-0.273367	-0.230519	-0.239933	-0.227737	-0.229673	-0.234137	-0.23428	-0.286628	-0.244671	-0.264165	-0.250576	-0.277189	-0.258902	-0.247521	-0.230538
1211	-0.278729	-0.260248	-0.267392	-0.295395	-0.265306	-0.275079	-0.283355	-0.304512	-0.272807	-0.306587	-0.301535	-0.283349	-0.277497	-0.296571	-0.261464	-0.260065	-0.257337	-0.306555	-0.259241	-0.291212	-0.278463	-0.288448	-0.258114	-0.268889	-0.325785	-0.272413	-0.287693	-0.256929	-0.242981	-0.305943	-0.282709	-0.291067	-0.277239	-0.264819	-0.273932	-0.215245	-0.242916	-0.232696	-0.234982	-0.225428	-0.21746	-0.286375	-0.239216	-0.272141	-0.254028	-0.280448	-0.258354	-0.242314	-0.232794
1213	-0.280493	-0.260781	-0.268771	-0.286782	-0.266384	-0.276274	-0.28264	-0.304512	-0.273821	-0.293144	-0.301535	-0.280104	-0.282833	-0.295132	-0.260433	-0.268749	-0.254653	-0.308681	-0.256334	-0.28694	-0.276448	-0.291009	-0.279081	-0.253299	-0.325785	-0.275353	-0.292689	-0.254895	-0.241176	-0.305943	-0.28047	-0.272577	-0.28396	-0.266714	-0.26444	-0.229724	-0.244267	-0.237665	-0.236001	-0.230509	-0.230352	-0.278935	-0.243559	-0.25982	-0.254212	-0.278188	-0.257707	-0.241281	-0.233115
1215	-0.281981	-0.263071	-0.270441	-0.279554	-0.268615	-0.279544	-0.279647	-0.304512	-0.274714	-0.276889	-0.300637	-0.276909	-0.286761	-0.292397	-0.25987	-0.279009	-0.249611	-0.307791	-0.250973	-0.280092	-0.273392	-0.29442	-0.306844	-0.235292	-0.325785	-0.277668	-0.29664	-0.253574	-0.240161	-0.305943	-0.281285	-0.250973	-0.289661	-0.267513	-0.258455	-0.239434	-0.245096	-0.248986	-0.23883	-0.234233	-0.240436	-0.273845	-0.245095	-0.249378	-0.252488	-0.272788	-0.257827	-0.24146	-0.233539
1217	-0.279432	-0.254319	-0.26576	-0.294872	-0.271048	-0.28567	-0.256309	-0.304512	-0.275127	-0.265671	-0.288145	-0.288369	-0.255181	-0.286747	-0.265928	-0.277394	-0.2361	-0.295394	-0.256543	-0.282088	-0.264634	-0.291824	-0.285986	-0.238784	-0.325785	-0.260988	-0.291492	-0.258128	-0.245491	-0.305943	-0.292868	-0.288314	-0.278666	-0.265412	-0.261745	-0.236525	-0.244543	-0.277109	-0.246448	-0.234367	-0.243092	-0.27497	-0.239205	-0.243904	-0.245718	-0.259079	-0.259979	-0.244844	-0.234238
1219	-0.276364	-0.255781	-0.267671	-0.305364	-0.273364	-0.287151	-0.249149	-0.304512	-0.274187	-0.260604	-0.280127	-0.291831	-0.240932	-0.283872	-0.269133	-0.278504	-0.232069	-0.284467	-0.260865	-0.282117	-0.261433	-0.290756	-0.28576	-0.240708	-0.322674	-0.252665	-0.279497	-0.263835	-0.24729	-0.305943	-0.297304	-0.313379	-0.271699	-0.264416	-0.263329	-0.236465	-0.244666	-0.277251	-0.245763	-0.242688	-0.243114	-0.263392	-0.239632	-0.242501	-0.246583	-0.242405	-0.260265	-0.244857	-0.233552
1221	-0.272273	-0.277425	-0.282608	-0.306321	-0.275446	-0.279457	-0.273957	-0.304512	-0.270571	-0.267693	-0.280953	-0.279487	-0.26093	-0.28648	-0.266701	-0.284997	-0.24677	-0.276443	-0.262722	-0.278261	-0.269209	-0.292706	-0.326303	-0.239534	-0.313416	-0.260856	-0.253972	-0.271818	-0.242113	-0.305943	-0.287621	-0.314189	-0.272694	-0.264367	-0.263452	-0.238846	-0.245368	-0.253406	-0.237962	-0.258027	-0.240879	-0.240924	-0.245476	-0.244588	-0.253995	-0.22319	-0.258951	-0.241982	-0.231679
1223	-0.27125	-0.284678	-0.282232	-0.301223	-0.281218	-0.276515	-0.278895	-0.304512	-0.27098	-0.269669	-0.281219	-0.275357	-0.274633	-0.290447	-0.265859	-0.28884	-0.252763	-0.26906	-0.257942	-0.278842	-0.266676	-0.293814	-0.323842	-0.238544	-0.307888	-0.249282	-0.252351	-0.269856	-0.241769	-0.305943	-0.28353	-0.3151	-0.27167	-0.260557	-0.251344	-0.243963	-0.244321	-0.270549	-0.237287	-0.243594	-0.237794	-0.255725	-0.247984	-0.250689	-0.252783	-0.225486	-0.258814	-0.237835	-0.231218
1225	-0.272269	-0.282346	-0.271657	-0.292092	-0.289445	-0.276738	-0.270598	-0.304512	-0.27407	-0.26824	-0.281114	-0.276699	-0.284143	-0.295319	-0.266077	-0.290917	-0.252956	-0.262103	-0.248744	-0.282379	-0.257277	-0.294361	-0.29274	-0.237677	-0.304844	-0.224543	-0.266651	-0.261271	-0.244645	-0.305943	-0.283165	-0.316079	-0.269302	-0.256259	-0.237203	-0.249574	-0.24276	-0.296182	-0.238692	-0.223537	-0.234699	-0.278556	-0.249182	-0.257245	-0.249356	-0.233071	-0.259057	-0.233574	-0.231226
1227	-0.274665	-0.268386	-0.26793	-0.292619	-0.28043	-0.282879	-0.278553	-0.295607	-0.272738	-0.263652	-0.281673	-0.27412	-0.273634	-0.284865	-0.263732	-0.285796	-0.248404	-0.261748	-0.24511	-0.277647	-0.257794	-0.294496	-0.285314	-0.243903	-0.303004	-0.23692	-0.272102	-0.267661	-0.253229	-0.305943	-0.27954	-0.306122	-0.268755	-0.258084	-0.236697	-0.252693	-0.240035	-0.299506	-0.244673	-0.227303	-0.234394	-0.285437	-0.243522	-0.256343	-0.244623	-0.240608	-0.260554	-0.23212	-0.232951
1229	-0.275815	-0.253887	-0.265316	-0.295376	-0.270705	-0.288473	-0.287779	-0.287955	-0.271033	-0.259031	-0.281922	-0.270249	-0.2608	-0.273674	-0.261567	-0.280844	-0.243592	-0.263176	-0.242805	-0.27229	-0.259297	-0.294333	-0.28348	-0.250147	-0.301801	-0.253989	-0.274984	-0.274176	-0.262754	-0.305943	-0.275814	-0.293823	-0.268716	-0.259308	-0.24058	-0.252585	-0.238095	-0.29713	-0.248536	-0.230772	-0.235451	-0.286941	-0.238809	-0.25547	-0.24149	-0.242468	-0.261048	-0.230653	-0.233046
1231	-0.267065	-0.248099	-0.262966	-0.302978	-0.274497	-0.28407	-0.288342	-0.298257	-0.271513	-0.257533	-0.27936	-0.261783	-0.253486	-0.273778	-0.26335	-0.284694	-0.242064	-0.269671	-0.243591	-0.271487	-0.25695	-0.292588	-0.294375	-0.248962	-0.303629	-0.263397	-0.269862	-0.265613	-0.27258	-0.305943	-0.274859	-0.277271	-0.270184	-0.259318	-0.253339	-0.24595	-0.237742	-0.283222	-0.248117	-0.23364	-0.239264	-0.277566	-0.236012	-0.254653	-0.241596	-0.232846	-0.259513	-0.22916	-0.229848
1233	-0.255666	-0.244992	-0.261898	-0.309075	-0.275825	-0.27558	-0.28641	-0.304512	-0.271918	-0.25948	-0.278569	-0.259868	-0.249949	-0.274696	-0.264294	-0.286409	-0.240867	-0.274391	-0.244327	-0.27175	-0.256043	-0.290578	-0.299414	-0.246994	-0.305245	-0.269837	-0.269414	-0.25793	-0.273593	-0.300657	-0.273294	-0.266528	-0.27119	-0.258107	-0.259908	-0.235784	-0.238739	-0.277261	-0.244977	-0.232452	-0.241197	-0.261604	-0.236328	-0.255128	-0.24195	-0.227745	-0.258405	-0.229492	-0.228174
1235	-0.240173	-0.24603	-0.262814	-0.312848	-0.273343	-0.260773	-0.280619	-0.304512	-0.27221	-0.266752	-0.280516	-0.268079	-0.252248	-0.276872	-0.263942	-0.284827	-0.240184	-0.276368	-0.244985	-0.27366	-0.257361	-0.288158	-0.295401	-0.243814	-0.306533	-0.271689	-0.276191	-0.25161	-0.260979	-0.287197	-0.270783	-0.264763	-0.271482	-0.256065	-0.262262	-0.223213	-0.240654	-0.276713	-0.239986	-0.228504	-0.241849	-0.241156	-0.238764	-0.256482	-0.242473	-0.225723	-0.257589	-0.231065	-0.227538
1237	-0.246724	-0.246407	-0.262602	-0.308603	-0.272147	-0.255921	-0.273929	-0.304512	-0.271094	-0.274518	-0.282485	-0.271769	-0.239524	-0.257529	-0.259872	-0.276943	-0.236253	-0.272682	-0.243785	-0.267455	-0.259527	-0.286509	-0.273915	-0.244301	-0.306883	-0.269239	-0.281389	-0.249361	-0.254408	-0.283179	-0.268702	-0.264774	-0.270985	-0.253474	-0.259067	-0.216779	-0.240795	-0.287543	-0.234596	-0.22396	-0.23632	-0.257744	-0.238106	-0.253925	-0.238961	-0.243868	-0.25433	-0.235317	-0.228895
1239	-0.264782	-0.246439	-0.261802	-0.300172	-0.271623	-0.256268	-0.26677	-0.304512	-0.269243	-0.282543	-0.284466	-0.2731	-0.218955	-0.226952	-0.253861	-0.265768	-0.230625	-0.26604	-0.241615	-0.257013	-0.262135	-0.285261	-0.243307	-0.246703	-0.306741	-0.264544	-0.285763	-0.249236	-0.250993	-0.284091	-0.266844	-0.265711	-0.270076	-0.25065	-0.253451	-0.212631	-0.239553	-0.297327	-0.229781	-0.218905	-0.230554	-0.278062	-0.236455	-0.249823	-0.234655	-0.261737	-0.250621	-0.238595	-0.230188
1241	-0.249936	-0.245629	-0.256268	-0.281472	-0.270449	-0.257433	-0.248682	-0.290057	-0.269272	-0.283422	-0.283352	-0.263871	-0.234017	-0.23356	-0.261428	-0.2787	-0.223503	-0.250496	-0.23433	-0.2362	-0.253229	-0.281813	-0.233372	-0.249708	-0.303913	-0.258596	-0.280537	-0.247577	-0.25673	-0.280265	-0.268928	-0.259541	-0.271286	-0.246807	-0.237074	-0.217591	-0.230538	-0.286367	-0.229513	-0.210904	-0.230326	-0.281655	-0.231336	-0.239301	-0.229412	-0.254071	-0.246559	-0.23181	-0.228691
1243	-0.239206	-0.244401	-0.251721	-0.263894	-0.269254	-0.258584	-0.233496	-0.278031	-0.269325	-0.278957	-0.281094	-0.254602	-0.249321	-0.244464	-0.265394	-0.28953	-0.219555	-0.237592	-0.227053	-0.225357	-0.243585	-0.279203	-0.2283	-0.25261	-0.301141	-0.255365	-0.27685	-0.24618	-0.259304	-0.276549	-0.265364	-0.259203	-0.271691	-0.242996	-0.226367	-0.233033	-0.224863	-0.268211	-0.226631	-0.206763	-0.227439	-0.270595	-0.226728	-0.230778	-0.225619	-0.256799	-0.243071	-0.220476	-0.227807
1245	-0.258948	-0.241654	-0.253289	-0.255113	-0.268207	-0.25936	-0.235174	-0.282119	-0.268779	-0.253697	-0.274976	-0.249131	-0.252298	-0.260264	-0.248432	-0.282059	-0.230123	-0.239645	-0.221735	-0.262228	-0.235027	-0.281109	-0.236821	-0.254826	-0.299626	-0.264541	-0.283541	-0.246517	-0.244532	-0.275097	-0.235502	-0.287172	-0.267769	-0.239237	-0.224631	-0.265061	-0.22447	-0.238667	-0.219611	-0.208732	-0.220344	-0.236347	-0.222929	-0.225415	-0.224121	-0.275973	-0.240491	-0.201944	-0.227891
1247	-0.260007	-0.238516	-0.246017	-0.242407	-0.268645	-0.258291	-0.246521	-0.277641	-0.260388	-0.235585	-0.267009	-0.242092	-0.244528	-0.253687	-0.233578	-0.271305	-0.230595	-0.242055	-0.218852	-0.272381	-0.232401	-0.274153	-0.245325	-0.250538	-0.297417	-0.270332	-0.281981	-0.242362	-0.235414	-0.272934	-0.219291	-0.287972	-0.261435	-0.241645	-0.224956	-0.247159	-0.220534	-0.222213	-0.216795	-0.218871	-0.210034	-0.216216	-0.213325	-0.218153	-0.221765	-0.250195	-0.240081	-0.195445	-0.2221
1249	-0.238191	-0.2349	-0.227919	-0.224896	-0.270903	-0.254961	-0.269706	-0.262672	-0.242392	-0.226224	-0.256777	-0.233133	-0.223602	-0.219711	-0.221305	-0.256529	-0.218703	-0.244904	-0.21895	-0.249822	-0.23704	-0.256345	-0.253807	-0.238286	-0.294356	-0.271979	-0.270321	-0.232705	-0.233217	-0.269902	-0.219792	-0.255503	-0.252146	-0.247354	-0.226384	-0.202535	-0.214701	-0.212765	-0.216228	-0.233383	-0.198004	-0.203641	-0.200615	-0.209875	-0.218948	-0.200357	-0.240831	-0.195387	-0.213163
1251	-0.226349	-0.2303	-0.22406	-0.203636	-0.268516	-0.248149	-0.252906	-0.251571	-0.248984	-0.23032	-0.262224	-0.228101	-0.231369	-0.218344	-0.213884	-0.251046	-0.217785	-0.234838	-0.215912	-0.232406	-0.233846	-0.250044	-0.253693	-0.241428	-0.291824	-0.253949	-0.249449	-0.227083	-0.223694	-0.268949	-0.220001	-0.248633	-0.247185	-0.236876	-0.215427	-0.220055	-0.214743	-0.22146	-0.220607	-0.225429	-0.196949	-0.207002	-0.194448	-0.214623	-0.205298	-0.18674	-0.230211	-0.194865	-0.210734
1253	-0.218507	-0.225306	-0.225911	-0.180871	-0.264266	-0.239939	-0.220071	-0.24202	-0.265436	-0.239813	-0.273958	-0.224645	-0.250645	-0.230055	-0.208408	-0.249291	-0.221268	-0.219592	-0.211616	-0.217054	-0.22751	-0.248357	-0.250132	-0.250743	-0.289504	-0.228027	-0.224882	-0.223079	-0.211231	-0.26883	-0.220091	-0.25203	-0.24396	-0.224165	-0.205536	-0.238048	-0.214278	-0.227813	-0.223476	-0.214368	-0.197517	-0.209959	-0.189032	-0.21748	-0.191218	-0.179218	-0.218915	-0.19355	-0.209321
1255	-0.213311	-0.213232	-0.230895	-0.199926	-0.25886	-0.241342	-0.217029	-0.250521	-0.259232	-0.236236	-0.265889	-0.225257	-0.223099	-0.214496	-0.209792	-0.22724	-0.217162	-0.209026	-0.2014	-0.219137	-0.221168	-0.243043	-0.230432	-0.239632	-0.280236	-0.22892	-0.221302	-0.218201	-0.216836	-0.269024	-0.219138	-0.228645	-0.240377	-0.208081	-0.205739	-0.231997	-0.209022	-0.215822	-0.217362	-0.198587	-0.200874	-0.20435	-0.184286	-0.206203	-0.179746	-0.184259	-0.209326	-0.188798	-0.209807
1257	-0.207467	-0.200254	-0.232618	-0.216606	-0.252458	-0.24101	-0.215276	-0.253687	-0.256308	-0.230307	-0.258631	-0.22371	-0.197067	-0.199513	-0.209676	-0.210329	-0.212319	-0.199782	-0.191452	-0.21935	-0.213723	-0.237103	-0.213465	-0.22791	-0.268233	-0.229282	-0.217163	-0.21157	-0.221333	-0.266093	-0.216096	-0.203915	-0.235003	-0.19906	-0.198929	-0.224279	-0.203218	-0.204912	-0.209578	-0.187903	-0.203705	-0.200057	-0.180898	-0.195592	-0.172441	-0.189853	-0.204198	-0.182475	-0.206031
1259	-0.199409	-0.184951	-0.223914	-0.222898	-0.243016	-0.234567	-0.21545	-0.23888	-0.265252	-0.217942	-0.25531	-0.215117	-0.179079	-0.188257	-0.204378	-0.210942	-0.205704	-0.194344	-0.182766	-0.212474	-0.202828	-0.229462	-0.20619	-0.215717	-0.248164	-0.226092	-0.209794	-0.199515	-0.221086	-0.253357	-0.20659	-0.17687	-0.224049	-0.198893	-0.183326	-0.214474	-0.196727	-0.195358	-0.199698	-0.183609	-0.205879	-0.197416	-0.179212	-0.185815	-0.170362	-0.196141	-0.204665	-0.174183	-0.196911
1261	-0.194923	-0.17158	-0.212358	-0.21663	-0.234159	-0.22845	-0.209924	-0.22361	-0.258246	-0.203222	-0.248932	-0.203507	-0.170103	-0.179506	-0.195771	-0.1986	-0.197856	-0.186967	-0.173303	-0.202996	-0.194243	-0.218995	-0.201493	-0.206234	-0.229247	-0.221847	-0.206903	-0.186867	-0.221098	-0.232934	-0.197169	-0.166955	-0.212126	-0.192099	-0.172072	-0.207914	-0.187144	-0.186849	-0.18775	-0.185875	-0.204202	-0.18996	-0.174369	-0.174164	-0.169649	-0.200533	-0.196202	-0.164843	-0.189478
1263	-0.19392	-0.160093	-0.19802	-0.198117	-0.225872	-0.222652	-0.19884	-0.207888	-0.235688	-0.186204	-0.239575	-0.188955	-0.169912	-0.173196	-0.183938	-0.173627	-0.188805	-0.177697	-0.163082	-0.190981	-0.187908	-0.20577	-0.199312	-0.199393	-0.211454	-0.216574	-0.20838	-0.173642	-0.221363	-0.205014	-0.18783	-0.173742	-0.199258	-0.18257	-0.162613	-0.202694	-0.176285	-0.178773	-0.174949	-0.190849	-0.200936	-0.180517	-0.168222	-0.161741	-0.1695	-0.204143	-0.184053	-0.15507	-0.182742
1265	-0.191683	-0.149404	-0.189167	-0.184501	-0.216417	-0.214658	-0.185594	-0.191098	-0.220554	-0.166826	-0.224015	-0.171745	-0.169262	-0.154297	-0.175787	-0.146334	-0.174469	-0.159994	-0.15087	-0.18492	-0.177106	-0.192553	-0.196624	-0.200454	-0.194121	-0.207442	-0.209381	-0.159895	-0.213277	-0.191718	-0.178068	-0.186736	-0.191681	-0.173967	-0.162297	-0.182033	-0.162007	-0.168229	-0.164566	-0.188356	-0.187229	-0.163516	-0.147406	-0.140672	-0.156371	-0.187911	-0.169544	-0.135128	-0.1801
1267	-0.188513	-0.138643	-0.181853	-0.172277	-0.206536	-0.205474	-0.171723	-0.17361	-0.207966	-0.146994	-0.206867	-0.153652	-0.167613	-0.131832	-0.168604	-0.119871	-0.15856	-0.140032	-0.137855	-0.180668	-0.164985	-0.179273	-0.193364	-0.203582	-0.177275	-0.196805	-0.209587	-0.145275	-0.202551	-0.182671	-0.167659	-0.200119	-0.185725	-0.16498	-0.160138	-0.159476	-0.146724	-0.157708	-0.155423	-0.181618	-0.172408	-0.146386	-0.126314	-0.116498	-0.141277	-0.165058	-0.155641	-0.113464	-0.176691
1269	-0.16958	-0.119286	-0.171907	-0.158237	-0.194526	-0.181364	-0.158363	-0.145604	-0.204683	-0.134055	-0.196902	-0.133044	-0.142022	-0.114449	-0.157851	-0.135734	-0.142684	-0.127135	-0.119018	-0.177417	-0.153178	-0.164196	-0.178427	-0.198721	-0.170162	-0.176228	-0.191645	-0.110704	-0.187532	-0.170664	-0.142762	-0.172918	-0.181042	-0.154666	-0.151157	-0.132224	-0.128508	-0.147489	-0.150061	-0.161839	-0.154956	-0.129546	-0.105702	-0.0830835	-0.121033	-0.122626	-0.14392	-0.0871807	-0.170414
1271	-0.146919	-0.0958808	-0.159391	-0.137424	-0.181811	-0.155362	-0.140206	-0.117191	-0.200177	-0.114897	-0.185119	-0.109804	-0.114795	-0.0867751	-0.142934	-0.145667	-0.128491	-0.109121	-0.0959863	-0.161782	-0.140446	-0.142683	-0.154678	-0.189678	-0.15745	-0.156382	-0.166967	-0.0816395	-0.174476	-0.161995	-0.120905	-0.141813	-0.173602	-0.1368	-0.135671	-0.114923	-0.112601	-0.13335	-0.133674	-0.144176	-0.140115	-0.116759	-0.0891695	-0.0577556	-0.101186	-0.0914087	-0.128465	-0.0687171	-0.159864
1273	-0.115515	-0.0629829	-0.140844	-0.100724	-0.167442	-0.124919	-0.110794	-0.0878232	-0.192804	-0.0811482	-0.169071	-0.0803896	-0.0837341	-0.0349643	-0.118248	-0.141692	-0.118244	-0.0791076	-0.0631165	-0.117101	-0.125546	-0.106075	-0.110257	-0.170828	-0.131604	-0.138248	-0.126488	-0.0654883	-0.166023	-0.161158	-0.106174	-0.101549	-0.159694	-0.111388	-0.113686	-0.107567	-0.0990006	-0.115293	-0.106271	-0.12863	-0.127881	-0.108023	-0.0767148	-0.0405087	-0.0817335	-0.0713993	-0.10928	-0.058068	-0.145043
1275	-0.0815909	-0.0156487	-0.11336	-0.0629341	-0.148751	-0.0833474	-0.0806173	-0.0291625	-0.178097	-0.0387159	-0.148936	-0.0390598	-0.0344969	0.0176316	-0.0913658	-0.122058	-0.0836805	-0.0312986	-0.0164631	-0.0727453	-0.0959423	-0.065882	-0.0600747	-0.158171	-0.105636	-0.125533	-0.103625	-0.0275089	-0.150877	-0.1344	-0.072767	-0.0675888	-0.141472	-0.0829849	-0.084086	-0.0770371	-0.0808106	-0.0993046	-0.0734383	-0.0983732	-0.111025	-0.0651378	-0.0629587	-0.00396762	-0.060339	-0.0609702	-0.0788774	-0.0218985	-0.127983
1277	-0.0457108	0.042887	-0.078941	-0.024299	-0.126706	-0.0331398	-0.0498478	0.0522274	-0.1577	0.010454	-0.125628	0.0115158	0.0288433	0.0708369	-0.0627806	-0.0902735	-0.0302496	0.0303186	0.0408855	-0.0286433	-0.0549298	-0.0229077	-0.00542226	-0.150322	-0.0795722	-0.117023	-0.0944312	0.0274076	-0.130535	-0.0875303	-0.0248679	-0.03852	-0.119901	-0.0535092	-0.0505866	-0.0381434	-0.0603122	-0.0823815	-0.0377124	-0.0643149	-0.0920849	-0.012089	-0.0468711	0.0392207	-0.0365283	-0.052074	-0.0451923	0.0240695	-0.110123
1279	0.0141498	0.175518	-0.0237532	0.0942121	-0.0910192	0.0101717	0.038327	0.149655	-0.129198	0.122425	-0.0976486	0.0953817	0.139894	0.203675	-0.00115938	-0.0170651	0.0397549	0.130803	0.158879	0.0589851	-0.0108847	0.0801176	0.0880199	-0.127765	-0.0276706	-0.0882541	-0.0453471	0.128438	-0.106374	-0.0629777	0.0431465	0.0271907	-0.0862697	-0.0189192	0.0359659	0.0423914	-0.00927645	-0.0116867	0.0397308	-0.0554129	-0.0506453	0.0283658	0.0352328	0.106246	0.0494356	0.0054437	-0.0175574	0.13598	-0.0885242
1281	0.0813862	0.328001	0.0421708	0.242148	-0.052108	0.0613124	0.146518	0.256707	-0.100717	0.252842	-0.0665637	0.191644	0.268237	0.358508	0.0728173	0.06951	0.118866	0.24312	0.299591	0.16464	0.0395476	0.202792	0.199684	-0.102907	0.0329395	-0.0483227	0.0194451	0.244204	-0.0793124	-0.0383619	0.120329	0.104692	-0.0469109	0.0242344	0.140183	0.150796	0.0581538	0.0636578	0.128624	-0.031589	0.00248748	0.0861138	0.136875	0.185419	0.154196	0.0788163	0.0274916	0.280151	-0.0607506
1283	0.172152	0.524012	0.171666	0.516702	-0.0094541	0.204519	0.334472	0.426085	-0.0892675	0.436235	-0.0143195	0.342003	0.469406	0.566675	0.201007	0.202946	0.254066	0.392362	0.540188	0.359079	0.147133	0.3961	0.411903	-0.085682	0.126465	0.0604695	0.157537	0.410696	-0.0313682	0.0331641	0.246861	0.223318	0.0243208	0.0880991	0.287125	0.326605	0.165235	0.150248	0.245209	0.028324	0.0839007	0.185686	0.285771	0.29397	0.304415	0.190534	0.114657	0.502348	-0.0180435
1285	0.294389	0.703813	0.302046	0.803493	0.0739503	0.366394	0.525739	0.58405	-0.0519309	0.604999	0.0625035	0.506496	0.630421	0.771849	0.360334	0.345921	0.397232	0.55649	0.789147	0.555262	0.289453	0.59318	0.609628	-0.0559473	0.228862	0.194831	0.314848	0.593558	0.0331888	0.11344	0.381709	0.400779	0.114442	0.177019	0.457933	0.48515	0.352379	0.273557	0.402617	0.13232	0.235264	0.353076	0.490346	0.483719	0.509158	0.423976	0.221507	0.783036	0.0488533
1287	0.47364	0.854244	0.43403	1.11245	0.231182	0.562093	0.723011	0.721336	0.0323041	0.747263	0.183856	0.696593	0.718692	0.971599	0.576071	0.506177	0.554832	0.747587	1.05325	0.754603	0.494699	0.797094	0.781096	-0.00354833	0.347332	0.375516	0.506979	0.806077	0.127843	0.209567	0.531623	0.684831	0.238786	0.285895	0.647753	0.629944	0.603294	0.426113	0.592539	0.271428	0.442343	0.574482	0.739269	0.738143	0.757327	0.75437	0.344034	1.11031	0.135017
1289	0.697219	0.966624	0.556665	1.2243	0.385929	0.76477	0.862431	0.813748	0.130112	0.828107	0.330389	0.854444	0.751428	1.10305	0.789215	0.650846	0.719247	0.919785	1.25247	0.881123	0.728896	0.976938	0.875595	0.0725014	0.507141	0.552979	0.687001	0.992808	0.24719	0.350578	0.671439	0.914121	0.365133	0.516112	0.857482	0.789738	0.894062	0.683934	0.890998	0.546506	0.752433	0.937774	1.0153	1.00393	0.989682	1.12474	0.578447	1.31563	0.301099
1291	0.947984	1.05567	0.673566	1.21527	0.539153	0.971728	0.966372	0.87864	0.236244	0.871282	0.492365	0.992518	0.750105	1.1926	1.00077	0.785955	0.887842	1.08039	1.41188	0.962982	0.980849	1.14202	0.92289	0.163056	0.692303	0.728465	0.859597	1.16373	0.381681	0.519117	0.805063	1.10983	0.492708	0.778869	1.06067	0.94799	1.17004	0.964237	1.19611	0.852693	1.06753	1.31455	1.28051	1.25759	1.20273	1.4729	0.841061	1.4676	0.490481
1293	1.15867	1.06415	0.766497	1.08902	0.679883	1.13654	1.01742	0.885825	0.36443	0.845057	0.665372	1.02517	0.703721	1.1517	1.07233	0.864509	1.03438	1.14482	1.37416	0.939085	1.16053	1.21379	0.867026	0.324326	0.876185	0.879711	0.948263	1.20069	0.575857	0.70653	0.888429	1.06243	0.613676	1.10675	1.1464	1.0543	1.19272	1.23907	1.31743	1.17413	1.19399	1.50267	1.36532	1.35381	1.24479	1.48742	1.14428	1.33142	0.742898
1295	1.33301	1.04411	0.844051	0.945327	0.811053	1.27558	1.05442	0.876789	0.498771	0.802003	0.826778	1.02636	0.643513	1.07938	1.09324	0.919717	1.15742	1.1761	1.28229	0.890365	1.30178	1.24987	0.789565	0.500531	1.04491	1.01449	1.01046	1.1958	0.778972	0.884422	0.952693	0.957568	0.729485	1.34902	1.15332	1.09767	1.10179	1.42751	1.29864	1.38084	1.18706	1.53442	1.34259	1.36568	1.20639	1.36092	1.37874	1.1282	0.962316
1297	1.32877	0.920962	0.851314	0.789774	0.896703	1.29825	1.05057	0.818041	0.651864	0.714554	0.913206	0.926191	0.537839	0.924804	0.928649	0.883404	1.16212	1.08936	1.02792	0.778722	1.27674	1.15121	0.665753	0.709251	1.12748	1.07293	0.983782	1.05136	0.988471	0.993373	0.94508	0.705664	0.820633	1.43156	1.0132	1.02361	0.798921	1.45476	1.01851	1.37357	0.931276	1.27444	1.11929	1.2202	1.01789	0.971376	1.48494	0.799912	1.12018
1299	1.22117	0.761824	0.813936	0.626859	0.946093	1.24847	1.00735	0.737193	0.795275	0.605647	0.954385	0.80457	0.416611	0.763286	0.72959	0.795868	1.07262	0.965204	0.773305	0.647482	1.17767	0.998773	0.540134	0.871835	1.1588	1.0774	0.922814	0.886549	1.14824	1.05296	0.905733	0.489535	0.876034	1.31411	0.810421	0.853825	0.532074	1.29447	0.699276	1.10638	0.634654	0.946562	0.834467	1.0058	0.782176	0.628243	1.40845	0.525734	1.13452
1301	0.966298	0.55141	0.712958	0.453455	0.943821	1.09548	0.90803	0.62486	0.924889	0.466169	0.931098	0.652388	0.273224	0.591877	0.481423	0.635356	0.848907	0.787754	0.518349	0.488321	0.973112	0.769725	0.411939	0.968689	1.1171	1.00496	0.812989	0.692694	1.23715	1.04221	0.821175	0.324374	0.880505	1.07046	0.568097	0.623623	0.287956	1.01581	0.355376	0.67516	0.31226	0.575837	0.510832	0.74789	0.516674	0.314398	1.21668	0.285701	1.0583
1303	0.705419	0.349882	0.580693	0.289412	0.876377	0.875692	0.735815	0.511158	0.975358	0.32964	0.865272	0.523415	0.154558	0.416419	0.308211	0.463525	0.581049	0.61508	0.322676	0.351217	0.748034	0.532373	0.267893	0.912685	0.987677	0.866295	0.662535	0.520437	1.18662	0.965699	0.708625	0.235586	0.798149	0.830389	0.371698	0.38068	0.157997	0.72707	0.18552	0.383062	0.155188	0.359472	0.317098	0.589899	0.337949	0.165387	0.934682	0.133608	0.829271
1305	0.441668	0.152601	0.433474	0.129843	0.777785	0.623982	0.52876	0.396803	0.987999	0.19452	0.779116	0.405534	0.047707	0.239025	0.170822	0.286284	0.29209	0.444688	0.155338	0.224655	0.513146	0.291052	0.116271	0.783623	0.816323	0.695968	0.492662	0.358503	1.06944	0.857757	0.582697	0.1833	0.674295	0.603549	0.194958	0.156641	0.0524391	0.45198	0.0514652	0.134285	0.0278534	0.178975	0.152626	0.450759	0.184808	0.0490524	0.65499	0.00512126	0.582888
1307	0.277688	0.0456517	0.300988	0.0128082	0.617622	0.397536	0.344233	0.27543	0.842498	0.11607	0.671791	0.309784	-0.0554549	0.147353	0.0939444	0.122324	0.127873	0.332312	0.0629123	0.0810731	0.341576	0.171097	0.0212721	0.58674	0.667718	0.450246	0.328321	0.274971	0.794395	0.714429	0.478524	0.0820761	0.496871	0.454046	0.098594	0.0582854	-0.00194269	0.26842	-0.0130895	0.0304057	-0.0594012	0.0851305	0.0554606	0.341187	0.113305	-0.00892616	0.466056	-0.0547336	0.361024
1309	0.139578	-0.0426659	0.178116	-0.0874211	0.454545	0.196052	0.175147	0.168787	0.677582	0.0513517	0.560452	0.220243	-0.137378	0.0682686	0.025131	-0.0105595	-0.0057418	0.232539	-0.0158679	-0.0380865	0.189409	0.0708957	-0.0635121	0.399799	0.532092	0.220298	0.182313	0.199308	0.525801	0.582686	0.379438	-0.000293679	0.33088	0.329293	0.0148101	-0.0207665	-0.0463326	0.133004	-0.0631872	-0.0500399	-0.124122	0.0075476	-0.0189966	0.245373	0.0501101	-0.0682487	0.311881	-0.102315	0.178593
1311	0.077453	-0.0807691	0.0889293	-0.132856	0.295188	0.0852049	0.0604504	0.120976	0.47596	0.0260643	0.438712	0.149383	-0.137833	0.0170808	-0.027174	-0.026166	-0.0511145	0.167481	-0.0600085	-0.0583801	0.0970365	0.0176855	-0.1225	0.26796	0.441247	0.0699186	0.10606	0.135037	0.320758	0.504502	0.294775	0.00239659	0.222301	0.240835	-0.0505265	-0.0715115	-0.0760701	0.0681847	-0.0920852	-0.0961217	-0.155798	-0.0461889	-0.0601549	0.169734	-0.00090357	-0.129542	0.20868	-0.131899	0.0539849
1313	0.0260004	-0.11496	0.0250178	-0.15308	0.182243	-0.00190796	-0.0235086	0.0756555	0.31246	-0.0108447	0.333626	0.0913387	-0.142846	-0.0139925	-0.0649389	-0.0518859	-0.0879032	0.113766	-0.094971	-0.0791458	0.0280545	-0.0298111	-0.155807	0.173983	0.354139	-0.0362176	0.0276132	0.0791444	0.167605	0.419578	0.221786	-0.0156615	0.13495	0.171681	-0.0920271	-0.106745	-0.0980416	0.0139014	-0.113772	-0.12242	-0.168736	-0.0800177	-0.0943996	0.118308	-0.0400436	-0.142719	0.134175	-0.149103	-0.0158451
1315	-0.0133777	-0.144724	-0.0102987	-0.144781	0.121806	-0.0621699	-0.0726924	0.0331505	0.192089	-0.0609017	0.247383	0.0477941	-0.153017	-0.0223095	-0.0862539	-0.0890475	-0.11498	0.0728829	-0.11955	-0.100445	-0.0144643	-0.0708434	-0.16006	0.122841	0.27126	-0.0923002	-0.0533165	0.0327315	0.073157	0.32703	0.162004	-0.0571931	0.0716144	0.112053	-0.121764	-0.134323	-0.116181	-0.0351822	-0.131899	-0.138956	-0.172425	-0.104022	-0.125232	0.0788324	-0.073324	-0.132151	0.0738331	-0.160197	-0.0586416
1317	-0.0467207	-0.154491	-0.0485261	-0.154822	0.0650477	-0.0854586	-0.0978359	-0.0163714	0.117861	-0.0934919	0.182656	0.00877697	-0.161931	-0.049853	-0.107935	-0.0985524	-0.148053	0.0269013	-0.13804	-0.135401	-0.0535768	-0.103655	-0.162273	0.0820738	0.20102	-0.121665	-0.103988	-0.010271	0.0174481	0.247907	0.106801	-0.0958225	0.0259597	0.0655963	-0.13284	-0.151795	-0.133206	-0.0668602	-0.148868	-0.156585	-0.173717	-0.121769	-0.142169	0.0366798	-0.0962413	-0.156042	0.0257703	-0.167358	-0.0863309
1319	-0.0778697	-0.156988	-0.0878119	-0.17153	0.00962624	-0.0953057	-0.114239	-0.0684443	0.0604093	-0.119732	0.125753	-0.0285942	-0.170388	-0.0843863	-0.12975	-0.0980025	-0.183305	-0.020934	-0.154317	-0.175321	-0.091451	-0.133478	-0.163743	0.045078	0.135375	-0.141316	-0.14366	-0.0520338	-0.0241773	0.173663	0.0532613	-0.133397	-0.013267	0.0208189	-0.144191	-0.168567	-0.149085	-0.0967002	-0.164693	-0.172328	-0.174965	-0.138139	-0.156038	-0.00635078	-0.116221	-0.178281	-0.0197905	-0.176331	-0.112632
1321	-0.100474	-0.16473	-0.101541	-0.193189	-0.0243407	-0.132686	-0.141749	-0.100774	0.0172452	-0.132328	0.0762425	-0.0604332	-0.18054	-0.113169	-0.150993	-0.11663	-0.189354	-0.0581918	-0.166906	-0.191174	-0.115626	-0.156697	-0.185573	0.0118711	0.0807638	-0.161473	-0.155971	-0.0787665	-0.0619392	0.121237	0.00892134	-0.148683	-0.0455259	-0.0209406	-0.162038	-0.185408	-0.160637	-0.1241	-0.176214	-0.180109	-0.176727	-0.150729	-0.161468	-0.0521711	-0.127273	-0.183894	-0.058741	-0.193786	-0.137654
1323	-0.121355	-0.175032	-0.11741	-0.215364	-0.0572386	-0.165141	-0.162832	-0.127017	-0.0274689	-0.146277	0.0290371	-0.090832	-0.190529	-0.138982	-0.168903	-0.133525	-0.192602	-0.0892871	-0.178418	-0.202097	-0.137119	-0.177706	-0.20914	-0.0221611	0.0298141	-0.177516	-0.168363	-0.104064	-0.094417	0.0702494	-0.0316121	-0.161851	-0.0758181	-0.0564778	-0.176362	-0.198507	-0.169272	-0.144205	-0.18448	-0.185508	-0.176079	-0.158949	-0.165569	-0.087288	-0.137893	-0.184691	-0.0901015	-0.2049	-0.15652
1325	-0.137433	-0.192522	-0.139489	-0.238962	-0.0872688	-0.183516	-0.165715	-0.13623	-0.0766526	-0.164136	-0.0117191	-0.117207	-0.200043	-0.156455	-0.177418	-0.145401	-0.188154	-0.103075	-0.186918	-0.199281	-0.151143	-0.192528	-0.237464	-0.0585472	-0.0108847	-0.181952	-0.181169	-0.125418	-0.112019	0.02317	-0.0614733	-0.169201	-0.100612	-0.0847667	-0.186582	-0.207246	-0.174508	-0.155813	-0.188955	-0.18813	-0.172621	-0.162078	-0.16812	-0.109936	-0.148009	-0.179878	-0.11262	-0.208628	-0.168214
1327	-0.152095	-0.200463	-0.159396	-0.249533	-0.111435	-0.191945	-0.166857	-0.147225	-0.110357	-0.178446	-0.0457482	-0.140045	-0.204895	-0.164715	-0.186113	-0.150503	-0.188176	-0.117376	-0.193652	-0.199387	-0.162135	-0.204564	-0.237939	-0.0863026	-0.0480087	-0.18211	-0.189582	-0.146315	-0.127087	-0.0165732	-0.0895861	-0.190467	-0.120646	-0.105876	-0.191324	-0.202132	-0.17958	-0.160033	-0.189715	-0.193015	-0.172718	-0.16784	-0.176273	-0.131623	-0.159414	-0.181824	-0.130377	-0.206521	-0.172621
1329	-0.165481	-0.199797	-0.177344	-0.248362	-0.130316	-0.191409	-0.16643	-0.159824	-0.130109	-0.189558	-0.073714	-0.159694	-0.205544	-0.164672	-0.194969	-0.149499	-0.192226	-0.132139	-0.198792	-0.202128	-0.170394	-0.214088	-0.213312	-0.106279	-0.0819106	-0.178413	-0.194037	-0.1668	-0.139871	-0.0497044	-0.116123	-0.224276	-0.136392	-0.124276	-0.194	-0.19179	-0.18459	-0.161464	-0.189073	-0.198754	-0.174156	-0.174595	-0.18654	-0.152947	-0.171305	-0.186321	-0.146337	-0.202212	-0.174279
1331	-0.176294	-0.199776	-0.182609	-0.236125	-0.147482	-0.196843	-0.162231	-0.185204	-0.136957	-0.19288	-0.103887	-0.170568	-0.209982	-0.166509	-0.205348	-0.174341	-0.19759	-0.147473	-0.203515	-0.204787	-0.182055	-0.224377	-0.203079	-0.123602	-0.112323	-0.179552	-0.190823	-0.179703	-0.154566	-0.0746177	-0.137488	-0.245236	-0.151982	-0.137447	-0.200543	-0.186655	-0.186795	-0.172683	-0.19645	-0.204569	-0.200212	-0.190535	-0.19849	-0.175735	-0.179977	-0.185347	-0.16131	-0.205519	-0.181619
1333	-0.1857	-0.199884	-0.185004	-0.221958	-0.16423	-0.203663	-0.159038	-0.211602	-0.140911	-0.194634	-0.134243	-0.179287	-0.215	-0.168675	-0.21478	-0.204264	-0.203443	-0.162367	-0.208198	-0.208454	-0.194684	-0.234578	-0.197309	-0.1407	-0.141444	-0.181812	-0.18627	-0.190204	-0.169316	-0.0977428	-0.156846	-0.260184	-0.167558	-0.150985	-0.20647	-0.184321	-0.189557	-0.183931	-0.204803	-0.206926	-0.214833	-0.200788	-0.210211	-0.191699	-0.187677	-0.187049	-0.174079	-0.207019	-0.189721
1335	-0.182521	-0.199259	-0.196062	-0.225375	-0.181626	-0.206992	-0.190806	-0.196625	-0.154119	-0.205118	-0.157604	-0.191064	-0.212606	-0.167874	-0.20069	-0.203155	-0.211737	-0.166984	-0.2141	-0.230038	-0.208413	-0.239723	-0.202692	-0.166135	-0.164204	-0.181206	-0.193844	-0.19397	-0.176188	-0.12773	-0.165187	-0.22988	-0.183597	-0.165757	-0.210481	-0.190048	-0.194033	-0.194977	-0.215783	-0.199139	-0.195196	-0.194091	-0.221214	-0.187603	-0.192615	-0.196763	-0.180414	-0.202996	-0.199891
1337	-0.180115	-0.200044	-0.206688	-0.235716	-0.196634	-0.204984	-0.207113	-0.192504	-0.169054	-0.208605	-0.176175	-0.198221	-0.20242	-0.166714	-0.194572	-0.217585	-0.215215	-0.174633	-0.220071	-0.244885	-0.216313	-0.244382	-0.203537	-0.183066	-0.180549	-0.185272	-0.200422	-0.197499	-0.18619	-0.151263	-0.17466	-0.199226	-0.1958	-0.178698	-0.210293	-0.197804	-0.19866	-0.20201	-0.226065	-0.200023	-0.18836	-0.196336	-0.220657	-0.192127	-0.193878	-0.198208	-0.186061	-0.20198	-0.206903
1339	-0.179364	-0.203848	-0.216386	-0.260867	-0.20653	-0.191554	-0.190339	-0.211609	-0.187684	-0.197122	-0.184497	-0.195493	-0.175562	-0.164783	-0.205507	-0.26526	-0.208388	-0.188769	-0.22619	-0.245318	-0.211745	-0.248001	-0.194674	-0.181802	-0.183168	-0.199331	-0.204867	-0.200524	-0.202889	-0.160988	-0.186552	-0.167825	-0.199795	-0.189939	-0.206205	-0.207444	-0.203426	-0.205316	-0.2357	-0.208964	-0.193418	-0.206887	-0.20936	-0.204661	-0.191727	-0.191972	-0.191069	-0.20376	-0.210979
1341	-0.179691	-0.205537	-0.216349	-0.26625	-0.210834	-0.192871	-0.17429	-0.221641	-0.19472	-0.196275	-0.194734	-0.199556	-0.1769	-0.16966	-0.211201	-0.256772	-0.208415	-0.195138	-0.224922	-0.25193	-0.209595	-0.249588	-0.207366	-0.180686	-0.195097	-0.209317	-0.213374	-0.207067	-0.207654	-0.173188	-0.191278	-0.174199	-0.203454	-0.18698	-0.207227	-0.204207	-0.206565	-0.190185	-0.225254	-0.214405	-0.196877	-0.215905	-0.202296	-0.196609	-0.192462	-0.193866	-0.196621	-0.210185	-0.21104
1343	-0.180788	-0.205711	-0.209339	-0.257477	-0.211133	-0.204746	-0.158759	-0.225175	-0.193452	-0.203045	-0.206341	-0.20848	-0.198427	-0.179413	-0.21314	-0.208065	-0.213351	-0.195944	-0.218365	-0.262968	-0.209175	-0.249719	-0.235494	-0.179674	-0.213695	-0.216386	-0.224792	-0.216129	-0.203873	-0.187162	-0.190873	-0.207625	-0.206874	-0.180879	-0.209545	-0.197769	-0.209329	-0.171192	-0.209577	-0.218038	-0.200118	-0.22401	-0.197066	-0.183424	-0.194062	-0.197759	-0.202161	-0.217236	-0.209775
1345	-0.189877	-0.202609	-0.210437	-0.235374	-0.210253	-0.211517	-0.176467	-0.227443	-0.191172	-0.193456	-0.205194	-0.211777	-0.210689	-0.180015	-0.211921	-0.222736	-0.217044	-0.193878	-0.215597	-0.233462	-0.209491	-0.25133	-0.221392	-0.187342	-0.207353	-0.219189	-0.224433	-0.217966	-0.206278	-0.188768	-0.192308	-0.231398	-0.213122	-0.191251	-0.209316	-0.199072	-0.213642	-0.17801	-0.201093	-0.20459	-0.208019	-0.222177	-0.205308	-0.182307	-0.196938	-0.196305	-0.204336	-0.210683	-0.204207
1347	-0.199978	-0.19936	-0.211857	-0.212621	-0.208957	-0.216941	-0.197665	-0.228246	-0.192256	-0.181965	-0.202536	-0.21323	-0.219114	-0.179204	-0.209925	-0.24224	-0.219802	-0.191418	-0.213908	-0.203412	-0.21052	-0.252239	-0.200239	-0.196013	-0.198463	-0.221274	-0.222194	-0.218056	-0.210996	-0.187591	-0.193865	-0.248993	-0.219097	-0.199396	-0.209054	-0.201391	-0.215287	-0.186096	-0.193238	-0.195498	-0.212636	-0.216969	-0.210406	-0.185629	-0.198479	-0.19522	-0.208366	-0.205942	-0.202279
1349	-0.206618	-0.199671	-0.204131	-0.203945	-0.206038	-0.218971	-0.198715	-0.219166	-0.221713	-0.178911	-0.206236	-0.208065	-0.210242	-0.180315	-0.206293	-0.208755	-0.216869	-0.189962	-0.21537	-0.227651	-0.216192	-0.245399	-0.183751	-0.20016	-0.205252	-0.223781	-0.221938	-0.214616	-0.225283	-0.182042	-0.193732	-0.231123	-0.218794	-0.2026	-0.208714	-0.205964	-0.211012	-0.196993	-0.186779	-0.196072	-0.20997	-0.204273	-0.208528	-0.1988	-0.197059	-0.194956	-0.216514	-0.205218	-0.208426
1351	-0.208002	-0.197954	-0.198819	-0.203283	-0.20698	-0.222649	-0.192651	-0.207473	-0.230064	-0.17946	-0.210473	-0.203583	-0.199878	-0.177557	-0.201803	-0.182057	-0.212826	-0.188668	-0.215289	-0.242906	-0.21955	-0.239051	-0.171649	-0.202316	-0.209788	-0.222738	-0.220065	-0.209603	-0.230304	-0.17855	-0.192478	-0.217569	-0.216758	-0.202127	-0.201701	-0.206169	-0.205332	-0.202339	-0.18335	-0.196118	-0.206348	-0.196818	-0.206499	-0.204761	-0.192328	-0.197857	-0.215076	-0.205157	-0.208793
1353	-0.200636	-0.192859	-0.197525	-0.215958	-0.214347	-0.229074	-0.174747	-0.191431	-0.20328	-0.186004	-0.215603	-0.200237	-0.187028	-0.168358	-0.195887	-0.166656	-0.206933	-0.187642	-0.212642	-0.243205	-0.219054	-0.233523	-0.166848	-0.201157	-0.210574	-0.215788	-0.2155	-0.201972	-0.219904	-0.178485	-0.189362	-0.211199	-0.211836	-0.198934	-0.189751	-0.203143	-0.198612	-0.203578	-0.182162	-0.195775	-0.202019	-0.193239	-0.204359	-0.205388	-0.185149	-0.203099	-0.206546	-0.205586	-0.204883
1355	-0.191744	-0.183603	-0.193517	-0.214493	-0.21381	-0.228375	-0.163344	-0.184611	-0.193913	-0.181853	-0.216872	-0.19546	-0.183141	-0.157878	-0.190489	-0.159031	-0.198358	-0.183093	-0.203934	-0.226727	-0.213957	-0.226432	-0.16609	-0.199703	-0.206497	-0.204691	-0.206572	-0.193053	-0.214529	-0.17856	-0.184701	-0.192799	-0.208535	-0.19557	-0.178792	-0.200099	-0.189115	-0.206327	-0.180664	-0.186637	-0.195294	-0.190778	-0.193153	-0.192505	-0.178159	-0.200744	-0.19938	-0.192081	-0.19987
1357	-0.181992	-0.172001	-0.187979	-0.205057	-0.208818	-0.223659	-0.155608	-0.182992	-0.194365	-0.171672	-0.215965	-0.189875	-0.184308	-0.146675	-0.185383	-0.15579	-0.18827	-0.176556	-0.19181	-0.200792	-0.206265	-0.21846	-0.167612	-0.198083	-0.199679	-0.191256	-0.195184	-0.183409	-0.211987	-0.178715	-0.179171	-0.167618	-0.206147	-0.191663	-0.168304	-0.196095	-0.178961	-0.207985	-0.178406	-0.175372	-0.188154	-0.187853	-0.179598	-0.176572	-0.170761	-0.195611	-0.191956	-0.174833	-0.194857
1359	-0.174358	-0.162323	-0.181273	-0.185781	-0.206422	-0.202997	-0.157449	-0.184876	-0.188731	-0.152452	-0.206713	-0.17653	-0.186078	-0.142377	-0.180887	-0.151219	-0.181075	-0.167609	-0.178573	-0.184578	-0.190585	-0.209136	-0.169629	-0.188422	-0.19501	-0.181698	-0.18244	-0.169381	-0.216545	-0.173229	-0.1731	-0.15409	-0.201773	-0.183321	-0.160271	-0.183762	-0.167728	-0.197626	-0.170043	-0.1603	-0.18141	-0.179014	-0.16074	-0.156675	-0.1595	-0.179002	-0.180004	-0.148294	-0.191694
1361	-0.166974	-0.15288	-0.174949	-0.168408	-0.204182	-0.179388	-0.157159	-0.186425	-0.183402	-0.136026	-0.19823	-0.16293	-0.18564	-0.137535	-0.176296	-0.144195	-0.17422	-0.157847	-0.16524	-0.169014	-0.175243	-0.19971	-0.17049	-0.178629	-0.189305	-0.173686	-0.170535	-0.155273	-0.219165	-0.166312	-0.166993	-0.145157	-0.196703	-0.171538	-0.152141	-0.166286	-0.154967	-0.181428	-0.156922	-0.149421	-0.175239	-0.168828	-0.142726	-0.141518	-0.146849	-0.158993	-0.165888	-0.127094	-0.186267
1363	-0.159716	-0.143585	-0.171129	-0.165666	-0.201342	-0.149594	-0.141244	-0.184462	-0.182797	-0.138228	-0.19797	-0.152175	-0.173941	-0.126346	-0.170912	-0.125716	-0.167517	-0.145319	-0.152018	-0.151539	-0.165794	-0.190486	-0.165358	-0.172432	-0.177324	-0.171286	-0.163507	-0.143087	-0.208426	-0.155292	-0.160994	-0.152847	-0.189238	-0.153826	-0.143843	-0.139949	-0.139574	-0.155166	-0.135603	-0.145769	-0.170059	-0.156323	-0.126166	-0.134533	-0.131802	-0.133124	-0.148038	-0.115099	-0.176938
1365	-0.149571	-0.138074	-0.165176	-0.169659	-0.195441	-0.128966	-0.1285	-0.182287	-0.183015	-0.14047	-0.195199	-0.14677	-0.159624	-0.120481	-0.162358	-0.115443	-0.162753	-0.13654	-0.139823	-0.141544	-0.157833	-0.179886	-0.152122	-0.169369	-0.162406	-0.169636	-0.161333	-0.133109	-0.195478	-0.144511	-0.152052	-0.143099	-0.181253	-0.136404	-0.127618	-0.121075	-0.127336	-0.141391	-0.113181	-0.137349	-0.148161	-0.131288	-0.110088	-0.120519	-0.11779	-0.117454	-0.126594	-0.106206	-0.161489
1367	-0.135634	-0.137536	-0.156418	-0.182508	-0.185517	-0.120387	-0.119926	-0.179831	-0.184314	-0.142765	-0.189129	-0.1484	-0.141864	-0.121613	-0.149637	-0.11596	-0.160538	-0.132691	-0.128978	-0.141381	-0.151826	-0.167474	-0.128234	-0.170425	-0.143626	-0.16897	-0.165537	-0.126034	-0.179624	-0.134046	-0.139243	-0.11043	-0.172587	-0.119151	-0.106762	-0.106559	-0.11694	-0.134907	-0.0901135	-0.126144	-0.1165	-0.0989347	-0.0942921	-0.102399	-0.104383	-0.107741	-0.103049	-0.099124	-0.142466
1369	-0.137288	-0.14159	-0.153003	-0.182396	-0.173497	-0.131907	-0.126089	-0.182863	-0.1778	-0.156993	-0.172245	-0.161207	-0.151768	-0.134308	-0.149723	-0.1227	-0.155034	-0.142411	-0.128888	-0.153819	-0.142803	-0.163598	-0.119793	-0.164227	-0.146675	-0.158483	-0.160897	-0.135781	-0.174985	-0.131345	-0.141625	-0.113855	-0.166167	-0.105681	-0.114781	-0.116796	-0.125889	-0.130099	-0.0804135	-0.0869443	-0.113846	-0.0920109	-0.107269	-0.0998453	-0.102837	-0.111984	-0.0907644	-0.106822	-0.123241
1371	-0.145745	-0.147648	-0.151918	-0.176628	-0.160563	-0.152196	-0.138681	-0.18829	-0.167879	-0.176428	-0.150644	-0.17889	-0.173741	-0.152049	-0.155395	-0.132154	-0.148095	-0.158051	-0.133489	-0.171754	-0.132463	-0.163446	-0.118093	-0.154864	-0.159247	-0.143711	-0.152397	-0.152868	-0.175238	-0.132031	-0.150634	-0.133028	-0.160727	-0.0970788	-0.127955	-0.131352	-0.137379	-0.124996	-0.0789745	-0.0568023	-0.116799	-0.0929146	-0.123123	-0.105158	-0.106103	-0.121398	-0.0827322	-0.118701	-0.108134
1373	-0.14766	-0.153291	-0.170786	-0.169058	-0.160389	-0.154633	-0.131045	-0.195026	-0.160758	-0.173616	-0.167645	-0.186213	-0.159089	-0.130014	-0.169722	-0.153651	-0.154246	-0.170342	-0.152817	-0.174945	-0.134537	-0.191955	-0.153273	-0.144666	-0.171492	-0.138514	-0.167333	-0.174795	-0.158979	-0.147588	-0.16538	-0.153686	-0.157932	-0.111797	-0.150518	-0.153431	-0.150352	-0.11731	-0.112832	-0.0916033	-0.131438	-0.119409	-0.13643	-0.142332	-0.127412	-0.149472	-0.0901755	-0.143515	-0.114844
1375	-0.153686	-0.160648	-0.185288	-0.165441	-0.161109	-0.15939	-0.126338	-0.20053	-0.155187	-0.172568	-0.181218	-0.193172	-0.152442	-0.118988	-0.182006	-0.169955	-0.159241	-0.18255	-0.170538	-0.175997	-0.141433	-0.21575	-0.177528	-0.139536	-0.185314	-0.138181	-0.179658	-0.192608	-0.142354	-0.165809	-0.179095	-0.173582	-0.157979	-0.132717	-0.166138	-0.169079	-0.162956	-0.121782	-0.148895	-0.119922	-0.1484	-0.142268	-0.14941	-0.17099	-0.147307	-0.167349	-0.107345	-0.159361	-0.126891
1377	-0.174832	-0.173972	-0.181884	-0.175729	-0.163102	-0.17469	-0.134622	-0.201598	-0.154567	-0.180774	-0.177475	-0.200353	-0.178632	-0.151618	-0.186006	-0.166622	-0.158383	-0.194949	-0.18062	-0.171768	-0.163208	-0.2192	-0.158828	-0.152013	-0.204622	-0.153275	-0.179637	-0.195533	-0.126813	-0.191114	-0.188434	-0.190632	-0.167461	-0.162072	-0.172314	-0.175978	-0.175059	-0.142795	-0.187958	-0.139422	-0.168523	-0.16018	-0.161946	-0.188062	-0.165277	-0.171351	-0.137745	-0.163004	-0.146198
1379	-0.191252	-0.181241	-0.180999	-0.200159	-0.170512	-0.179854	-0.139592	-0.203694	-0.160737	-0.185617	-0.195169	-0.2077	-0.191681	-0.174427	-0.195476	-0.161309	-0.16392	-0.204335	-0.190282	-0.171666	-0.182309	-0.224977	-0.161241	-0.163718	-0.222605	-0.161123	-0.182523	-0.20076	-0.127983	-0.20322	-0.197749	-0.211547	-0.178826	-0.175648	-0.185218	-0.177171	-0.179388	-0.168714	-0.19947	-0.158166	-0.176537	-0.169645	-0.172829	-0.199201	-0.179425	-0.178359	-0.158054	-0.168483	-0.154302
1381	-0.20273	-0.182176	-0.182749	-0.23938	-0.183585	-0.174417	-0.141096	-0.206865	-0.174007	-0.186944	-0.235279	-0.215219	-0.190989	-0.186966	-0.210664	-0.153925	-0.176143	-0.210572	-0.199505	-0.175882	-0.198614	-0.233187	-0.185734	-0.174615	-0.239203	-0.161394	-0.188449	-0.208396	-0.14663	-0.201525	-0.207038	-0.236505	-0.192158	-0.182059	-0.201179	-0.175772	-0.180187	-0.196861	-0.198473	-0.176565	-0.179054	-0.175275	-0.182961	-0.207646	-0.191838	-0.186731	-0.173781	-0.174795	-0.15732
1383	-0.202328	-0.182775	-0.187039	-0.239367	-0.189947	-0.182933	-0.149368	-0.203022	-0.179401	-0.180999	-0.248811	-0.22	-0.196074	-0.180486	-0.209416	-0.167391	-0.179856	-0.213343	-0.202369	-0.191631	-0.206032	-0.237161	-0.193957	-0.180946	-0.245121	-0.175569	-0.189905	-0.21166	-0.157114	-0.205875	-0.223643	-0.249858	-0.198714	-0.196567	-0.200831	-0.174395	-0.179489	-0.19494	-0.195381	-0.176374	-0.179569	-0.185519	-0.188968	-0.213991	-0.18916	-0.182055	-0.179721	-0.178755	-0.164144
1385	-0.197862	-0.183116	-0.191985	-0.226639	-0.194254	-0.19582	-0.159736	-0.196897	-0.182239	-0.172839	-0.253486	-0.223697	-0.202591	-0.167948	-0.202778	-0.187409	-0.180711	-0.214813	-0.203019	-0.210876	-0.210526	-0.239622	-0.196922	-0.185914	-0.247386	-0.19397	-0.189886	-0.213465	-0.164915	-0.212114	-0.242096	-0.259251	-0.203047	-0.208188	-0.198775	-0.173763	-0.177698	-0.191112	-0.191604	-0.176233	-0.179878	-0.193716	-0.191852	-0.217533	-0.184995	-0.177444	-0.184266	-0.181301	-0.170691
1387	-0.183846	-0.175076	-0.186756	-0.222652	-0.206927	-0.196895	-0.163122	-0.191832	-0.186677	-0.17441	-0.250249	-0.216846	-0.182666	-0.165676	-0.196186	-0.191029	-0.177767	-0.206821	-0.196381	-0.213679	-0.214503	-0.235093	-0.204472	-0.198568	-0.241021	-0.193286	-0.189412	-0.213735	-0.172361	-0.213077	-0.22891	-0.259885	-0.207368	-0.207849	-0.193509	-0.175834	-0.172213	-0.185884	-0.185727	-0.179684	-0.179806	-0.193641	-0.184153	-0.21129	-0.178206	-0.175461	-0.185545	-0.179147	-0.175537
1389	-0.171544	-0.165604	-0.182105	-0.215361	-0.215704	-0.195968	-0.162062	-0.186398	-0.18978	-0.173412	-0.244707	-0.208946	-0.164615	-0.1628	-0.190129	-0.18929	-0.175292	-0.196323	-0.189547	-0.210307	-0.215698	-0.229969	-0.203222	-0.208191	-0.232697	-0.193991	-0.189997	-0.21079	-0.179394	-0.212716	-0.214742	-0.257812	-0.211437	-0.204644	-0.185464	-0.17659	-0.167285	-0.182625	-0.18016	-0.183817	-0.177877	-0.188618	-0.174587	-0.203751	-0.173055	-0.173275	-0.18481	-0.171044	-0.178312
1391	-0.163619	-0.152476	-0.178929	-0.199629	-0.21453	-0.18993	-0.149646	-0.180026	-0.189474	-0.165855	-0.233283	-0.198367	-0.151352	-0.158379	-0.185438	-0.173862	-0.174015	-0.179425	-0.182216	-0.191165	-0.209791	-0.223328	-0.179497	-0.210076	-0.21937	-0.198245	-0.193283	-0.199632	-0.185373	-0.208976	-0.198067	-0.248826	-0.214864	-0.198335	-0.174408	-0.175924	-0.162958	-0.181498	-0.174928	-0.188687	-0.173938	-0.178239	-0.162999	-0.194807	-0.169678	-0.170869	-0.181895	-0.1565	-0.178844
1393	-0.16063	-0.137209	-0.175616	-0.175663	-0.208496	-0.185363	-0.135682	-0.168681	-0.189637	-0.147612	-0.223487	-0.183873	-0.144925	-0.144945	-0.178046	-0.159116	-0.167595	-0.16035	-0.171577	-0.17112	-0.198004	-0.215632	-0.148835	-0.204411	-0.205363	-0.201019	-0.190173	-0.183881	-0.189965	-0.203252	-0.182967	-0.219088	-0.2117	-0.187599	-0.158585	-0.168172	-0.1525	-0.179676	-0.158374	-0.186327	-0.164912	-0.166541	-0.147756	-0.183388	-0.159405	-0.152362	-0.174407	-0.136087	-0.177764
1395	-0.161751	-0.120162	-0.172186	-0.144838	-0.198416	-0.18202	-0.12043	-0.153193	-0.19019	-0.120467	-0.215048	-0.166119	-0.144193	-0.124002	-0.168404	-0.144938	-0.156892	-0.139464	-0.158185	-0.150323	-0.181321	-0.207056	-0.112394	-0.192458	-0.190789	-0.202563	-0.181735	-0.164304	-0.193401	-0.195878	-0.169179	-0.172066	-0.203045	-0.175255	-0.141169	-0.157875	-0.139804	-0.177637	-0.137848	-0.181404	-0.154056	-0.154179	-0.131184	-0.17087	-0.146637	-0.128339	-0.165264	-0.113606	-0.176111
1397	-0.152517	-0.100002	-0.156098	-0.111134	-0.190017	-0.168347	-0.106019	-0.13048	-0.189866	-0.0963483	-0.203237	-0.139534	-0.117901	-0.101931	-0.146953	-0.12352	-0.134821	-0.118986	-0.134461	-0.12663	-0.167615	-0.187777	-0.0986183	-0.183892	-0.166954	-0.189345	-0.166999	-0.141987	-0.190644	-0.183637	-0.147531	-0.113974	-0.186535	-0.152844	-0.129162	-0.134401	-0.111408	-0.178236	-0.107751	-0.167262	-0.133376	-0.116582	-0.105839	-0.128963	-0.119009	-0.106546	-0.146189	-0.0851671	-0.172191
1399	-0.139966	-0.0782121	-0.136526	-0.0787262	-0.181358	-0.151594	-0.0915233	-0.104168	-0.188698	-0.0727984	-0.189967	-0.109962	-0.082623	-0.0770023	-0.121631	-0.100878	-0.111249	-0.0970417	-0.107569	-0.101257	-0.154028	-0.164632	-0.0858279	-0.176101	-0.140137	-0.171734	-0.150614	-0.118588	-0.186051	-0.170752	-0.123784	-0.058215	-0.167899	-0.130694	-0.111592	-0.111169	-0.0831979	-0.161279	-0.0847917	-0.152244	-0.116814	-0.0802723	-0.0790303	-0.0856483	-0.089776	-0.0876082	-0.127426	-0.0568833	-0.16402
1401	-0.116351	-0.0451733	-0.110577	-0.0710297	-0.164491	-0.126649	-0.0734928	-0.0540493	-0.179531	-0.0474679	-0.168357	-0.0689653	-0.0100269	-0.0196125	-0.0825712	-0.0841987	-0.102307	-0.0555419	-0.0714092	-0.0633458	-0.133176	-0.124574	-0.0187075	-0.168034	-0.103233	-0.142535	-0.132104	-0.089698	-0.176695	-0.16411	-0.0968783	-0.0642216	-0.145762	-0.109238	-0.0791637	-0.0885836	-0.0554802	-0.0974426	-0.0808936	-0.134883	-0.111245	-0.0474008	-0.0483121	-0.0385759	-0.0562612	-0.0762918	-0.1095	-0.0290128	-0.144498
1403	-0.0907883	-0.00975599	-0.0870781	-0.0665137	-0.142498	-0.0975426	-0.0580399	-0.0109728	-0.166238	-0.0199868	-0.143906	-0.0327003	0.0408227	0.0289918	-0.0460635	-0.0641868	-0.0857084	-0.0177589	-0.0342496	-0.0327347	-0.106672	-0.087463	0.02685	-0.153109	-0.0717328	-0.11396	-0.109286	-0.0544573	-0.158046	-0.141306	-0.0687701	-0.0631294	-0.121056	-0.0805808	-0.045081	-0.0458234	-0.0214883	-0.042001	-0.0560799	-0.0987224	-0.0874004	-0.0304566	-0.0186182	0.00501641	-0.0209442	-0.0484799	-0.0862523	0.00843905	-0.118123
1405	-0.0614142	0.0303166	-0.0683753	-0.0682226	-0.110473	-0.0602905	-0.0476321	0.0183215	-0.144868	0.0117033	-0.113893	-0.00569698	0.0491096	0.0604008	-0.0145508	-0.0376529	-0.0541218	0.0127492	0.0048666	-0.0164101	-0.0691065	-0.0561226	0.0302042	-0.12476	-0.0508089	-0.0866035	-0.0780353	-0.00678808	-0.121208	-0.0868661	-0.0383087	-0.0481436	-0.0913228	-0.0457037	-0.00956899	0.0143613	0.0179227	0.00619006	-0.0132018	-0.0463238	-0.0477713	-0.0272687	0.0101909	0.045603	0.0159295	-0.00642095	-0.0584098	0.0541661	-0.0858288
1407	-0.0272851	0.0789625	-0.034117	-0.0177527	-0.0782941	-0.0198456	-0.00770965	0.04928	-0.128594	0.0486192	-0.0836512	0.0245669	0.0714894	0.0912645	0.0334498	-0.0163013	-0.0144166	0.0469329	0.0507191	0.00946435	-0.025148	-0.0112796	0.0517104	-0.0889448	-0.0295806	-0.0479072	-0.0451449	0.0335143	-0.0884246	-0.0506718	-0.00739349	-0.00754854	-0.0606829	-0.00762357	0.0387887	0.0702188	0.0559849	0.0219877	0.033682	0.00762358	0.0175253	0.0112783	0.0575089	0.0834191	0.0666031	0.0420751	-0.0115677	0.118888	-0.0509232
1409	0.00998301	0.133268	0.0104108	0.0671644	-0.0460145	0.0227071	0.0516975	0.0813371	-0.115684	0.088985	-0.0532589	0.0569832	0.103173	0.121768	0.0923354	0.00162928	0.0306482	0.0835432	0.101019	0.0416435	0.0230307	0.0424774	0.0852002	-0.048201	-0.00815135	-0.00172444	-0.0111718	0.0689533	-0.0583179	-0.0265226	0.0238212	0.0499532	-0.0294442	0.0310427	0.0905755	0.124427	0.0936863	0.0304353	0.08185	0.0625003	0.086941	0.0584805	0.108612	0.122017	0.120912	0.0905659	0.0386565	0.187135	-0.0149459
1411	0.0677494	0.183808	0.0477507	0.113406	-0.00266722	0.0732095	0.110265	0.135964	-0.0818744	0.145173	-0.0220231	0.0957338	0.164681	0.185072	0.130047	0.0265908	0.0926751	0.130471	0.144294	0.0973103	0.0495468	0.0926426	0.108174	-0.021902	0.0280801	0.0286646	0.041468	0.120523	-0.0200414	0.00322821	0.0609619	0.0895741	-0.00449067	0.0666609	0.145702	0.170372	0.131026	0.0491805	0.134162	0.125226	0.123595	0.103565	0.147844	0.181848	0.178105	0.115857	0.0694352	0.238014	0.0271188
1413	0.126465	0.238994	0.0876439	0.157995	0.0407879	0.125012	0.169312	0.198176	-0.0457053	0.205146	0.0120647	0.137527	0.23672	0.257366	0.165563	0.059834	0.157362	0.182566	0.192562	0.161191	0.0741345	0.144074	0.140667	0.0038922	0.0685688	0.0593949	0.0946388	0.174824	0.0191532	0.0357085	0.100639	0.127508	0.022555	0.104476	0.205014	0.219564	0.172455	0.0843501	0.186295	0.179961	0.163318	0.147347	0.191631	0.24269	0.23915	0.15763	0.104386	0.292271	0.0685823
1415	0.170497	0.328938	0.151876	0.23121	0.0736247	0.177315	0.23241	0.287717	-0.0152509	0.274091	0.0642525	0.193061	0.348238	0.355842	0.208166	0.140945	0.222366	0.258456	0.281212	0.255635	0.108085	0.207607	0.247224	0.041124	0.122207	0.10857	0.132224	0.230769	0.0560853	0.0806017	0.151115	0.17254	0.0699485	0.146774	0.272867	0.275379	0.222228	0.15303	0.23806	0.218395	0.209303	0.188471	0.244714	0.305593	0.308056	0.23303	0.147847	0.353421	0.108819
1417	0.232552	0.436535	0.218337	0.338484	0.113046	0.235953	0.316347	0.384805	0.0224245	0.357946	0.110426	0.265729	0.456259	0.472855	0.271666	0.237667	0.290321	0.342832	0.389999	0.353525	0.163213	0.286317	0.365441	0.0722855	0.180785	0.167668	0.189036	0.307721	0.0949865	0.126316	0.209885	0.239434	0.119098	0.192914	0.342575	0.344617	0.281966	0.219509	0.298373	0.296117	0.282917	0.241828	0.314612	0.3698	0.385353	0.312837	0.207394	0.438549	0.160898
1419	0.32222	0.571179	0.288212	0.497944	0.162557	0.304299	0.432211	0.493458	0.0711637	0.464648	0.147383	0.364646	0.55892	0.618268	0.367184	0.358307	0.362798	0.440206	0.529641	0.456696	0.250787	0.388278	0.501523	0.0941466	0.246931	0.24197	0.275306	0.416859	0.136905	0.173289	0.281365	0.339826	0.170939	0.241691	0.413555	0.423068	0.348543	0.284478	0.36455	0.400801	0.375491	0.303579	0.39605	0.434902	0.468408	0.395667	0.277979	0.540132	0.221103
1421	0.425994	0.731775	0.381768	0.689377	0.236621	0.405959	0.564823	0.639348	0.127797	0.609836	0.20507	0.506269	0.691726	0.780893	0.487349	0.480058	0.471821	0.58362	0.696533	0.6049	0.361281	0.526943	0.665256	0.12808	0.337729	0.343594	0.387982	0.558743	0.183117	0.233295	0.400955	0.489976	0.241841	0.311371	0.514407	0.543427	0.449488	0.38395	0.468781	0.504364	0.458125	0.411943	0.514733	0.558763	0.577885	0.512582	0.356612	0.670541	0.288956
1423	0.537063	0.905793	0.487573	0.897346	0.323383	0.524851	0.706096	0.804496	0.188512	0.774928	0.273477	0.669978	0.840122	0.952421	0.620263	0.602383	0.599747	0.750844	0.877518	0.776395	0.483629	0.68459	0.84329	0.168257	0.441275	0.459349	0.514314	0.717563	0.231551	0.300043	0.545429	0.665861	0.322602	0.391613	0.625776	0.674241	0.56392	0.497118	0.584335	0.604546	0.539571	0.534803	0.646181	0.698183	0.69774	0.637814	0.443532	0.810672	0.362464
1425	0.692086	1.08259	0.639651	1.08734	0.447072	0.687638	0.856663	0.988586	0.255247	0.948744	0.373594	0.873338	1.0089	1.11784	0.802692	0.739859	0.756805	0.963262	1.08454	0.962142	0.653682	0.875797	1.00589	0.228876	0.599617	0.597835	0.670321	0.927636	0.329749	0.421946	0.730883	0.87052	0.428888	0.523156	0.777285	0.830208	0.734574	0.667856	0.735981	0.681584	0.624414	0.706405	0.825143	0.879377	0.860884	0.782145	0.580782	0.986446	0.467711
1427	0.859374	1.25374	0.801492	1.25908	0.58113	0.861623	1.00853	1.16653	0.328917	1.11633	0.488343	1.08125	1.16728	1.2757	0.99556	0.882068	0.915669	1.17532	1.28846	1.14054	0.832235	1.06892	1.15878	0.302173	0.772744	0.738596	0.831053	1.14412	0.4406	0.563228	0.921447	1.0746	0.545233	0.682548	0.942908	0.989497	0.927752	0.850874	0.895651	0.77039	0.737572	0.902122	1.01574	1.07287	1.04229	0.948796	0.744208	1.18071	0.585371
1429	1.06398	1.39938	0.988986	1.35819	0.74683	1.06833	1.16271	1.31102	0.430477	1.25379	0.655083	1.29461	1.27332	1.40306	1.21584	1.03933	1.07187	1.36957	1.46958	1.28195	1.03045	1.25826	1.27516	0.423052	0.990217	0.881031	1.00157	1.36994	0.588373	0.76863	1.1194	1.26579	0.695981	0.886354	1.13104	1.15409	1.15685	1.05348	1.06812	0.877966	0.89589	1.1363	1.22491	1.28597	1.25283	1.15104	0.949381	1.40448	0.722829
1431	1.25678	1.51576	1.16259	1.41491	0.91954	1.26184	1.30134	1.42435	0.54942	1.3681	0.847276	1.48136	1.33888	1.50438	1.40615	1.18729	1.21755	1.53085	1.60176	1.39518	1.21531	1.42044	1.37117	0.575703	1.21317	1.02646	1.15476	1.55672	0.746151	0.992941	1.31057	1.42023	0.860308	1.1179	1.32258	1.31916	1.38399	1.2427	1.25292	1.03181	1.11024	1.3777	1.42025	1.50578	1.46211	1.3858	1.18921	1.60816	0.878709
1433	1.43523	1.59662	1.31935	1.42016	1.10076	1.43932	1.42109	1.49985	0.689466	1.4543	1.07037	1.63582	1.35531	1.5741	1.56006	1.32396	1.35047	1.6521	1.67449	1.47418	1.38396	1.54964	1.44244	0.766924	1.44279	1.17554	1.28693	1.6961	0.916075	1.24021	1.4935	1.53006	1.04112	1.36441	1.51597	1.4845	1.61006	1.42469	1.44437	1.21063	1.35483	1.62299	1.60813	1.72921	1.67071	1.6381	1.44774	1.801	1.04453
1435	1.5567	1.60328	1.41752	1.38622	1.25954	1.54698	1.48976	1.52808	0.847981	1.48558	1.28039	1.68641	1.35218	1.59562	1.60246	1.4174	1.42563	1.71354	1.65739	1.48027	1.49555	1.59896	1.42914	0.987859	1.62702	1.30792	1.36608	1.74045	1.09325	1.45604	1.60876	1.5196	1.21386	1.58489	1.64369	1.60402	1.72284	1.55728	1.62275	1.41794	1.59238	1.72045	1.7142	1.83798	1.79403	1.74142	1.68446	1.82259	1.23719
1437	1.65555	1.5805	1.49244	1.33673	1.40941	1.62692	1.53816	1.53756	1.01383	1.49507	1.48523	1.69578	1.3413	1.59802	1.60059	1.4937	1.47786	1.75124	1.60462	1.45742	1.58451	1.61656	1.38227	1.22059	1.79324	1.43368	1.42418	1.74708	1.27329	1.6594	1.69716	1.46141	1.38339	1.77986	1.73895	1.69776	1.78277	1.66749	1.76254	1.62376	1.80367	1.7701	1.77451	1.90796	1.88493	1.80333	1.88789	1.80182	1.42795
1439	1.66769	1.50618	1.49768	1.25536	1.48378	1.64082	1.53492	1.53504	1.19376	1.4247	1.58432	1.63645	1.29868	1.50977	1.48446	1.44769	1.42644	1.71472	1.50008	1.40099	1.56437	1.56494	1.27079	1.44627	1.83263	1.44875	1.43323	1.67185	1.41539	1.75599	1.67491	1.37245	1.50721	1.86823	1.71274	1.69224	1.64779	1.69585	1.72944	1.81019	1.89646	1.6632	1.6589	1.84865	1.86315	1.73884	1.94682	1.65999	1.59822
1441	1.64423	1.429	1.47987	1.18196	1.53668	1.62481	1.51851	1.51952	1.36662	1.36183	1.65046	1.56806	1.24789	1.42913	1.36956	1.39213	1.3729	1.65719	1.40185	1.33761	1.52696	1.50162	1.17155	1.63416	1.84019	1.45102	1.42848	1.59591	1.53134	1.81606	1.64383	1.28178	1.59858	1.85523	1.6511	1.62863	1.50073	1.66252	1.63647	1.87749	1.85691	1.54329	1.53905	1.75932	1.80506	1.62961	1.9471	1.52718	1.71301
1443	1.51607	1.34621	1.39515	1.1352	1.52787	1.52046	1.46461	1.46456	1.51669	1.32716	1.6213	1.47595	1.17381	1.37776	1.26569	1.31464	1.31934	1.53931	1.3264	1.25488	1.44297	1.40646	1.11424	1.70554	1.75725	1.42067	1.38409	1.52293	1.56881	1.76983	1.59236	1.18774	1.59242	1.71416	1.5447	1.49164	1.3384	1.55127	1.46785	1.79431	1.65017	1.40694	1.41382	1.63206	1.7011	1.46387	1.87328	1.40577	1.7577
1445	1.40033	1.28501	1.33654	1.10989	1.50413	1.43828	1.41008	1.42878	1.59369	1.29857	1.56179	1.4073	1.12941	1.36357	1.1929	1.22513	1.24801	1.45737	1.27658	1.2005	1.355	1.31884	1.08668	1.68723	1.6713	1.37659	1.33259	1.45464	1.56344	1.68731	1.52623	1.1477	1.54598	1.58193	1.45931	1.4313	1.24459	1.44056	1.33432	1.63705	1.46639	1.33237	1.31418	1.55297	1.58512	1.3282	1.7338	1.33075	1.67258
1447	1.2966	1.24468	1.30318	1.10534	1.46593	1.37754	1.35493	1.41153	1.60006	1.27586	1.47292	1.36134	1.1137	1.38534	1.15016	1.12399	1.15951	1.41018	1.25155	1.17352	1.26318	1.23851	1.08788	1.58219	1.58243	1.31924	1.2742	1.3909	1.51667	1.56972	1.44593	1.15986	1.46059	1.45338	1.38266	1.40289	1.17931	1.33008	1.21539	1.44893	1.29217	1.28354	1.22521	1.49395	1.46414	1.20507	1.56697	1.27505	1.53339
1449	1.23616	1.22244	1.25455	1.12982	1.41276	1.34329	1.30359	1.34998	1.54119	1.2505	1.39274	1.33818	1.09786	1.36106	1.14791	1.11837	1.12103	1.38056	1.24079	1.15689	1.22539	1.21918	1.07607	1.47581	1.51285	1.26287	1.23957	1.35924	1.4277	1.48605	1.39602	1.16481	1.37542	1.41226	1.32375	1.3416	1.18657	1.29444	1.17778	1.31128	1.18198	1.21389	1.22441	1.47405	1.40568	1.20412	1.50544	1.28104	1.41805
1451	1.19043	1.20599	1.20266	1.16152	1.3554	1.3167	1.25505	1.27642	1.46294	1.2235	1.3171	1.32051	1.0824	1.32328	1.15796	1.14017	1.09835	1.35509	1.23449	1.14474	1.20435	1.21774	1.06157	1.36967	1.45002	1.20718	1.21159	1.33656	1.32691	1.4137	1.35407	1.16745	1.2917	1.38133	1.2813	1.28378	1.19814	1.27311	1.15209	1.19564	1.10686	1.16753	1.23492	1.453	1.36349	1.21347	1.45849	1.29012	1.31799
1453	1.19621	1.20225	1.18279	1.15817	1.30371	1.28673	1.25052	1.22992	1.38001	1.17418	1.29337	1.27087	1.07754	1.28679	1.17768	1.14372	1.10397	1.30296	1.2348	1.17009	1.2056	1.21475	1.0766	1.28042	1.41528	1.16151	1.17467	1.30205	1.24161	1.37638	1.28695	1.16493	1.24428	1.37487	1.29091	1.24057	1.21651	1.29096	1.15714	1.14688	1.14	1.1994	1.27352	1.42424	1.36825	1.24415	1.44863	1.30306	1.26547
1455	1.20362	1.19407	1.16017	1.14562	1.25636	1.26708	1.24581	1.17782	1.30691	1.12549	1.26836	1.2133	1.06957	1.2422	1.18855	1.14101	1.10823	1.25388	1.22615	1.18215	1.20578	1.20388	1.08543	1.21314	1.37625	1.12903	1.14402	1.26195	1.18374	1.33937	1.22101	1.15371	1.20229	1.36346	1.28878	1.22037	1.22543	1.2966	1.16427	1.13976	1.17861	1.23752	1.30473	1.3963	1.36078	1.2621	1.45122	1.29644	1.23669
1457	1.2148	1.17562	1.13116	1.11172	1.21908	1.27135	1.24067	1.11274	1.25668	1.07825	1.24038	1.1373	1.05438	1.1788	1.17886	1.12375	1.10934	1.21185	1.1967	1.16333	1.20347	1.1747	1.07987	1.1969	1.32727	1.12718	1.1279	1.20886	1.18953	1.30308	1.15782	1.12229	1.17293	1.34707	1.27484	1.22334	1.22484	1.28993	1.17348	1.17457	1.22271	1.28194	1.3285	1.36917	1.34099	1.26723	1.46634	1.27015	1.23181
1459	1.19901	1.13744	1.09614	1.07158	1.18537	1.28277	1.22307	1.03604	1.23164	1.01762	1.19402	1.05438	1.02408	1.09894	1.14648	1.09563	1.09528	1.15005	1.14449	1.12231	1.1778	1.1239	1.04317	1.18634	1.25695	1.12727	1.11097	1.14423	1.19676	1.23462	1.08504	1.06745	1.15296	1.31347	1.24208	1.22369	1.18771	1.26059	1.16032	1.20398	1.23433	1.27444	1.29654	1.3071	1.29085	1.24541	1.43224	1.21883	1.23711
1461	1.16246	1.08409	1.05649	1.02663	1.1544	1.29969	1.1959	0.950408	1.226	0.946689	1.13351	0.966126	0.982169	1.00643	1.09665	1.05915	1.06955	1.07304	1.07476	1.0642	1.13418	1.05646	0.982534	1.18013	1.17022	1.12887	1.09343	1.07073	1.20509	1.14143	1.00486	0.994579	1.14021	1.27335	1.20243	1.22167	1.13816	1.22308	1.13924	1.23	1.23481	1.24854	1.24579	1.23315	1.2308	1.21392	1.38201	1.15857	1.24472
1463	1.08918	0.996013	0.991072	0.943743	1.11199	1.27433	1.12632	0.856189	1.21237	0.862331	1.06485	0.861006	0.900427	0.908706	1.00275	0.9825	1.01012	0.964741	0.979369	0.974217	1.06044	0.95633	0.895157	1.14405	1.06651	1.09485	1.04425	0.973688	1.18089	1.03496	0.907537	0.906418	1.09779	1.19067	1.12482	1.16194	1.05023	1.14489	1.0828	1.19317	1.19811	1.14075	1.14229	1.12284	1.15486	1.13615	1.30187	1.05587	1.22073
1465	1.00532	0.898222	0.917477	0.849735	1.06307	1.23193	1.04584	0.759227	1.19491	0.774592	0.991343	0.751468	0.80735	0.809733	0.897328	0.894356	0.941039	0.849937	0.876234	0.874927	0.977893	0.848453	0.803438	1.09982	0.959178	1.05028	0.985131	0.869671	1.14706	0.926827	0.806078	0.813983	1.0456	1.09883	1.03629	1.08977	0.955149	1.05647	1.01313	1.1442	1.14646	1.01852	1.03406	1.01307	1.07301	1.04215	1.21381	0.946358	1.18646
1467	0.892101	0.775558	0.816088	0.723578	0.974081	1.10868	0.944209	0.652796	1.15628	0.68086	0.887128	0.632745	0.683847	0.709001	0.768177	0.774874	0.845633	0.734484	0.749285	0.749053	0.870028	0.730705	0.722933	1.03626	0.850537	0.974555	0.892814	0.744948	1.08476	0.828979	0.698741	0.710616	0.957968	0.984628	0.921135	0.987214	0.842617	0.943105	0.911149	1.06562	1.05835	0.861073	0.914282	0.904576	0.976752	0.908554	1.10641	0.820233	1.1271
1469	0.769156	0.6546	0.711806	0.601651	0.880519	0.971331	0.84575	0.549267	1.10702	0.580608	0.777686	0.521821	0.569638	0.604343	0.64884	0.661702	0.747723	0.620678	0.619588	0.629861	0.75817	0.618314	0.645828	0.965941	0.740121	0.894465	0.794867	0.621615	1.01285	0.720194	0.58991	0.600975	0.865452	0.867718	0.814044	0.888732	0.71753	0.834413	0.78969	0.977197	0.939968	0.713324	0.786344	0.794401	0.864372	0.76712	0.977853	0.711036	1.05546
1471	0.62875	0.536702	0.602331	0.487313	0.778759	0.808669	0.75299	0.450948	1.03871	0.468654	0.658862	0.424895	0.472111	0.492638	0.547118	0.559859	0.645316	0.509827	0.484961	0.522664	0.639142	0.51554	0.574827	0.883497	0.626518	0.806532	0.686817	0.500776	0.923677	0.591779	0.478396	0.48007	0.764175	0.748633	0.713429	0.793519	0.582368	0.729475	0.652599	0.880876	0.797293	0.573362	0.651856	0.682873	0.739056	0.619395	0.832319	0.615423	0.973961
1473	0.511318	0.431918	0.498519	0.389535	0.68187	0.669309	0.65771	0.373921	0.94929	0.376113	0.548887	0.332171	0.397182	0.391049	0.444314	0.457228	0.533963	0.407994	0.377503	0.42272	0.531692	0.405038	0.474694	0.779335	0.512563	0.709973	0.579083	0.394331	0.818653	0.481084	0.380351	0.381302	0.655335	0.628661	0.60515	0.686035	0.461728	0.617301	0.55577	0.748926	0.66923	0.482683	0.531403	0.570164	0.627439	0.516616	0.696846	0.512301	0.870605
1475	0.407847	0.335105	0.398149	0.301822	0.587942	0.544112	0.560897	0.309835	0.84705	0.295371	0.444289	0.242001	0.335986	0.295608	0.340853	0.354118	0.417173	0.311643	0.286558	0.327185	0.431278	0.28984	0.356855	0.661972	0.398394	0.608171	0.471541	0.296633	0.703992	0.381158	0.290491	0.295988	0.541898	0.508784	0.496063	0.576672	0.347559	0.504812	0.4677	0.613386	0.549215	0.400599	0.41506	0.457292	0.519438	0.424081	0.565671	0.40774	0.761477
1477	0.326551	0.247507	0.312585	0.226306	0.480579	0.431497	0.4681	0.238795	0.729749	0.230711	0.343472	0.155152	0.253007	0.250215	0.25168	0.283634	0.33335	0.239495	0.206947	0.252046	0.342566	0.205052	0.25216	0.56023	0.302014	0.507314	0.386536	0.22145	0.590798	0.289786	0.224139	0.213719	0.436813	0.392137	0.396775	0.476534	0.269405	0.406535	0.378008	0.525247	0.482415	0.293068	0.309827	0.345484	0.41792	0.334895	0.457389	0.305616	0.641999
1479	0.248084	0.168237	0.230366	0.153175	0.375423	0.328928	0.377094	0.169504	0.611192	0.171046	0.246993	0.0759166	0.173995	0.210198	0.169534	0.224463	0.252772	0.171272	0.135106	0.182163	0.257003	0.129312	0.156079	0.460009	0.213997	0.40856	0.306295	0.152517	0.478819	0.20027	0.15901	0.135491	0.335846	0.288961	0.308698	0.379495	0.196259	0.312774	0.293079	0.433188	0.40873	0.208133	0.224593	0.247281	0.327917	0.256618	0.352782	0.21729	0.53074
1481	0.169509	0.129333	0.1563	0.0846717	0.292497	0.273997	0.293293	0.115143	0.496475	0.127935	0.172287	0.0372938	0.133215	0.164239	0.116729	0.205543	0.166612	0.107657	0.098946	0.127171	0.180742	0.0826264	0.099132	0.35705	0.160331	0.321007	0.236614	0.10256	0.372639	0.115033	0.0837321	0.0778901	0.252084	0.211121	0.24171	0.288287	0.132531	0.227507	0.217109	0.333758	0.322097	0.165699	0.17697	0.174667	0.259573	0.198859	0.255086	0.154915	0.434941
1483	0.105256	0.0908017	0.0977689	0.0204027	0.215593	0.209767	0.221348	0.0660625	0.397217	0.0816806	0.109689	-0.00179656	0.0909752	0.121567	0.0699896	0.161276	0.105402	0.0552962	0.058802	0.0829347	0.1093	0.0365513	0.0617504	0.263352	0.112935	0.249669	0.166597	0.0578282	0.277453	0.0513854	0.0254653	0.0239329	0.18129	0.140704	0.174151	0.22421	0.0842348	0.176101	0.15774	0.25902	0.248737	0.104844	0.113481	0.108324	0.192943	0.12906	0.18402	0.0989852	0.34484
1485	0.0612298	0.0527942	0.0611786	-0.0378861	0.147193	0.132405	0.166149	0.0244406	0.319791	0.0309859	0.0641912	-0.0415472	0.046674	0.083534	0.031818	0.0812143	0.0794302	0.0188288	0.0130313	0.0538875	0.0446626	-0.00866111	0.0520002	0.182735	0.0743963	0.201233	0.0961061	0.0204747	0.197792	0.0182265	-0.00877721	-0.0248793	0.128811	0.0750088	0.106228	0.17739	0.0457542	0.146233	0.10893	0.199988	0.183818	0.0322722	0.0398991	0.04597	0.127403	0.051603	0.129891	0.0471541	0.258362
1487	0.020857	0.0135867	0.0262562	-0.065771	0.0921388	0.0817137	0.145388	-0.00173872	0.244047	-0.00790398	0.0220475	-0.0684861	0.000178712	0.0453909	-0.00069581	0.049743	0.0454789	-0.0161627	-0.0193953	0.0217909	0.0136824	-0.0461079	0.0310557	0.113499	0.0360501	0.139158	0.0579298	-0.0162684	0.144526	-0.0199744	-0.0412902	-0.0475235	0.0788072	0.0380257	0.0555715	0.113114	0.0107372	0.100032	0.0563286	0.145166	0.110583	-0.00408151	0.00519421	0.025003	0.0718324	-0.0045617	0.075192	0.00402604	0.192023
1489	-0.0177866	-0.0261889	-0.00787676	-0.0792653	0.0434012	0.0436453	0.140928	-0.0206088	0.169098	-0.0412064	-0.0185085	-0.0893609	-0.0473551	0.00719565	-0.0305318	0.0412705	0.00775081	-0.0504556	-0.0455059	-0.011749	-0.00136721	-0.0798792	0.00481277	0.0496496	-0.00220488	0.0706277	0.0350487	-0.0527227	0.103753	-0.0605616	-0.0729846	-0.057782	0.0299755	0.00485002	0.00796918	0.0501597	-0.0233805	0.0521822	0.00379151	0.0912603	0.041104	-0.0322739	-0.023907	0.00708158	0.0200801	-0.0516874	0.0227075	-0.0349635	0.129764
1491	-0.0561349	-0.0478963	-0.037598	-0.0975615	0.00647924	0.0103347	0.0925082	-0.0477962	0.117722	-0.0651141	-0.040927	-0.110432	-0.0601241	-0.0348675	-0.0581424	0.013928	-0.0122458	-0.0760716	-0.0697399	-0.0565652	-0.0234239	-0.100466	0.00679733	0.0139558	-0.0420404	0.0290568	-0.00453367	-0.0870117	0.0525665	-0.0818495	-0.0896929	-0.0905413	-0.00809267	-0.0300602	-0.0359581	0.0106913	-0.0549929	0.00851639	-0.045016	0.0393143	0.00210198	-0.0419321	-0.0525911	-0.0284136	-0.0168675	-0.0617492	-0.01561	-0.056064	0.0749873
1493	-0.089384	-0.0666471	-0.0662072	-0.11781	-0.0285277	-0.0223567	0.044135	-0.0739361	0.0692413	-0.0872051	-0.063314	-0.130322	-0.069318	-0.0676423	-0.0850584	-0.0142138	-0.0322087	-0.0990699	-0.0928679	-0.0971955	-0.0469783	-0.120041	0.00417012	-0.0176399	-0.0793083	-0.00877545	-0.0421061	-0.117407	0.00194261	-0.100842	-0.103821	-0.121809	-0.0418047	-0.059723	-0.0717286	-0.0269421	-0.081403	-0.0346931	-0.0838202	-0.00646613	-0.0322653	-0.0561295	-0.0771003	-0.060353	-0.0472055	-0.0756458	-0.0424614	-0.0752269	0.0254698
1495	-0.103181	-0.0782656	-0.0915819	-0.144419	-0.0589412	-0.0537801	0.0061236	-0.0941391	0.0263796	-0.104519	-0.0897827	-0.145644	-0.0728803	-0.0639645	-0.10983	-0.0410433	-0.0561508	-0.114057	-0.112197	-0.119189	-0.0746423	-0.138803	-0.022651	-0.0400712	-0.106381	-0.0385418	-0.0681149	-0.133396	-0.0441162	-0.115517	-0.111545	-0.142156	-0.0613349	-0.081631	-0.0954451	-0.0618635	-0.100125	-0.0772282	-0.107841	-0.0431349	-0.0597831	-0.0770353	-0.0954395	-0.0870378	-0.0677757	-0.0952093	-0.0523682	-0.0915264	-0.0162754
1497	-0.111952	-0.091923	-0.110737	-0.157045	-0.0825209	-0.0780687	-0.0269118	-0.11324	-0.0125735	-0.122362	-0.113018	-0.159044	-0.0837621	-0.0586943	-0.130768	-0.0669392	-0.0748228	-0.128196	-0.127263	-0.132416	-0.0998111	-0.155908	-0.0556798	-0.0579925	-0.128301	-0.0669903	-0.0838735	-0.145727	-0.0763036	-0.132185	-0.122528	-0.154238	-0.0826328	-0.0976191	-0.113518	-0.0950127	-0.11389	-0.113655	-0.119753	-0.0754931	-0.0831002	-0.103421	-0.106899	-0.106671	-0.0829393	-0.115296	-0.0684418	-0.108477	-0.0439044
1499	-0.115086	-0.107867	-0.122915	-0.153985	-0.0984348	-0.0943537	-0.0543656	-0.131104	-0.0471423	-0.140798	-0.132627	-0.170289	-0.102854	-0.0516378	-0.147404	-0.0917881	-0.0875833	-0.141381	-0.137548	-0.135809	-0.122181	-0.171154	-0.0956719	-0.0708548	-0.144441	-0.0939608	-0.0881343	-0.153954	-0.0929312	-0.151087	-0.137169	-0.15705	-0.105914	-0.110661	-0.128781	-0.12728	-0.125187	-0.147042	-0.125638	-0.105706	-0.104327	-0.132534	-0.114934	-0.122796	-0.0954121	-0.135644	-0.0875848	-0.125752	-0.0645079
1501	-0.118955	-0.121255	-0.130559	-0.149044	-0.113846	-0.110865	-0.0691245	-0.147588	-0.0735545	-0.149478	-0.145754	-0.178275	-0.115829	-0.0666709	-0.153097	-0.0994212	-0.0981678	-0.152967	-0.146716	-0.144559	-0.138084	-0.181542	-0.121188	-0.088954	-0.15795	-0.104348	-0.101084	-0.163041	-0.107812	-0.168294	-0.151803	-0.153051	-0.124772	-0.129055	-0.140197	-0.143931	-0.133927	-0.151767	-0.127408	-0.122393	-0.110913	-0.146446	-0.119725	-0.134478	-0.10882	-0.137639	-0.110262	-0.137257	-0.0844667
1503	-0.123088	-0.133722	-0.136571	-0.143427	-0.129076	-0.127459	-0.0793183	-0.163574	-0.0970335	-0.15465	-0.15655	-0.185091	-0.126605	-0.0896477	-0.154854	-0.100863	-0.10797	-0.163978	-0.155482	-0.155236	-0.151662	-0.190185	-0.141497	-0.108936	-0.170512	-0.108772	-0.117159	-0.172439	-0.122065	-0.184891	-0.166434	-0.146602	-0.142041	-0.146207	-0.149571	-0.155582	-0.141846	-0.151276	-0.128995	-0.135962	-0.115503	-0.155889	-0.124205	-0.146475	-0.121887	-0.137045	-0.130923	-0.146233	-0.10401
1505	-0.134396	-0.137151	-0.149096	-0.157508	-0.141052	-0.132609	-0.0912643	-0.160385	-0.118493	-0.143959	-0.163935	-0.188079	-0.11863	-0.110141	-0.151637	-0.100195	-0.119635	-0.165901	-0.164108	-0.166888	-0.15838	-0.194193	-0.140101	-0.134347	-0.175413	-0.105756	-0.132238	-0.178814	-0.135854	-0.186431	-0.176426	-0.138956	-0.147752	-0.156654	-0.151721	-0.151399	-0.147169	-0.137991	-0.131072	-0.140796	-0.1163	-0.151559	-0.128376	-0.1611	-0.133275	-0.131338	-0.142254	-0.146556	-0.122039
1507	-0.145769	-0.139719	-0.160485	-0.167341	-0.15258	-0.133985	-0.102209	-0.152565	-0.137629	-0.134991	-0.171815	-0.191373	-0.113325	-0.120514	-0.148994	-0.102463	-0.126705	-0.16628	-0.170833	-0.171753	-0.163771	-0.197298	-0.134688	-0.156605	-0.176375	-0.104519	-0.143067	-0.184411	-0.147603	-0.187102	-0.185878	-0.131634	-0.15279	-0.161223	-0.151026	-0.149488	-0.15088	-0.131252	-0.129651	-0.145102	-0.117341	-0.147571	-0.132785	-0.172541	-0.140593	-0.131171	-0.152451	-0.145363	-0.13495
1509	-0.157318	-0.139892	-0.168699	-0.16531	-0.16286	-0.124841	-0.110358	-0.131845	-0.150286	-0.130845	-0.181076	-0.195519	-0.115484	-0.102659	-0.147958	-0.112926	-0.120955	-0.162355	-0.172253	-0.157682	-0.165464	-0.197886	-0.11809	-0.170064	-0.166356	-0.10825	-0.142042	-0.187838	-0.15366	-0.185363	-0.193829	-0.12522	-0.155964	-0.158895	-0.146992	-0.150242	-0.152699	-0.132198	-0.124125	-0.148787	-0.118669	-0.143987	-0.137472	-0.180242	-0.143133	-0.137507	-0.161318	-0.14239	-0.141853
1511	-0.157252	-0.134094	-0.168569	-0.148958	-0.174335	-0.120228	-0.110421	-0.13055	-0.154605	-0.136706	-0.189839	-0.197628	-0.121903	-0.0894362	-0.145445	-0.106368	-0.125044	-0.162134	-0.173944	-0.137362	-0.165539	-0.19822	-0.105484	-0.171414	-0.163453	-0.107652	-0.138056	-0.191363	-0.158315	-0.189413	-0.196529	-0.111401	-0.15974	-0.161561	-0.149521	-0.150974	-0.150817	-0.133869	-0.119404	-0.13598	-0.10611	-0.143478	-0.136439	-0.165527	-0.14493	-0.13527	-0.170537	-0.142311	-0.144599
1513	-0.146808	-0.122959	-0.160983	-0.119809	-0.186878	-0.119663	-0.103258	-0.146615	-0.151475	-0.151508	-0.198157	-0.197917	-0.132129	-0.0803522	-0.14161	-0.0846009	-0.137926	-0.165223	-0.175876	-0.111456	-0.164169	-0.198326	-0.0964455	-0.161943	-0.166909	-0.103186	-0.131425	-0.194975	-0.161719	-0.198639	-0.194536	-0.090965	-0.164055	-0.16613	-0.15455	-0.151696	-0.147525	-0.135818	-0.11499	-0.116891	-0.0882616	-0.144141	-0.133228	-0.142273	-0.146443	-0.129767	-0.17989	-0.143334	-0.145762
1515	-0.142098	-0.11935	-0.164101	-0.123398	-0.189856	-0.127832	-0.0835272	-0.160699	-0.143934	-0.155722	-0.199835	-0.19977	-0.142199	-0.106459	-0.143248	-0.0994851	-0.140035	-0.181146	-0.172105	-0.118332	-0.165656	-0.205581	-0.0904681	-0.150299	-0.182515	-0.110553	-0.121178	-0.20095	-0.159769	-0.203637	-0.194526	-0.0871131	-0.163117	-0.169747	-0.151222	-0.153873	-0.15529	-0.143899	-0.13595	-0.125938	-0.0973979	-0.123139	-0.141494	-0.131141	-0.152274	-0.114383	-0.166926	-0.153305	-0.142191
1517	-0.139994	-0.118485	-0.169747	-0.133856	-0.189849	-0.137312	-0.0638275	-0.172992	-0.13615	-0.156222	-0.199464	-0.202185	-0.150199	-0.139353	-0.146553	-0.119815	-0.138949	-0.19916	-0.167463	-0.133166	-0.168132	-0.214379	-0.0860002	-0.140342	-0.199354	-0.120719	-0.111759	-0.206946	-0.156218	-0.207819	-0.195083	-0.0877074	-0.16085	-0.17388	-0.151956	-0.151366	-0.160801	-0.152168	-0.153666	-0.131153	-0.106721	-0.11192	-0.148548	-0.126922	-0.155944	-0.104372	-0.157152	-0.160763	-0.142678
1519	-0.15631	-0.130518	-0.170767	-0.115655	-0.181898	-0.130448	-0.0997265	-0.164046	-0.143634	-0.141047	-0.193935	-0.207153	-0.124294	-0.131479	-0.15375	-0.0705611	-0.131686	-0.195879	-0.173233	-0.137365	-0.174605	-0.217641	-0.0933457	-0.16808	-0.183531	-0.125824	-0.132035	-0.20296	-0.149367	-0.216886	-0.196419	-0.0899367	-0.159381	-0.179573	-0.165016	-0.134933	-0.159241	-0.160773	-0.160887	-0.124028	-0.115648	-0.130438	-0.15161	-0.142754	-0.153062	-0.110629	-0.157614	-0.160461	-0.155348
1521	-0.169068	-0.142777	-0.173995	-0.105647	-0.177085	-0.129849	-0.125883	-0.162485	-0.151826	-0.135778	-0.196853	-0.211861	-0.104844	-0.123031	-0.159529	-0.0566628	-0.132645	-0.194134	-0.178441	-0.143322	-0.181291	-0.219533	-0.101767	-0.185016	-0.168932	-0.129562	-0.143968	-0.199912	-0.144644	-0.219037	-0.200794	-0.0955635	-0.158866	-0.186357	-0.17058	-0.135069	-0.161642	-0.15662	-0.163916	-0.136167	-0.119117	-0.144092	-0.153847	-0.166469	-0.155635	-0.118839	-0.164777	-0.15897	-0.161829
1523	-0.174287	-0.155516	-0.181904	-0.112997	-0.178924	-0.142521	-0.131398	-0.176572	-0.161517	-0.151496	-0.217668	-0.216017	-0.0990718	-0.113367	-0.162305	-0.117672	-0.151025	-0.195643	-0.18246	-0.153002	-0.188429	-0.218522	-0.112469	-0.179066	-0.156922	-0.130401	-0.138224	-0.198852	-0.144433	-0.206537	-0.211607	-0.108388	-0.160374	-0.194162	-0.169127	-0.150715	-0.167748	-0.140524	-0.163022	-0.166337	-0.117477	-0.153192	-0.155312	-0.197562	-0.163316	-0.128878	-0.178212	-0.156365	-0.162518
1525	-0.177985	-0.163015	-0.184597	-0.130739	-0.181202	-0.14334	-0.115733	-0.181243	-0.169758	-0.166941	-0.215013	-0.221071	-0.0997093	-0.128349	-0.165774	-0.141731	-0.164323	-0.201397	-0.189427	-0.160814	-0.186788	-0.223684	-0.116812	-0.179545	-0.17185	-0.134595	-0.146633	-0.204792	-0.147083	-0.20808	-0.217548	-0.122246	-0.171233	-0.186833	-0.168557	-0.151976	-0.171995	-0.14736	-0.16617	-0.1683	-0.122168	-0.15585	-0.167303	-0.185968	-0.1678	-0.14201	-0.183243	-0.166755	-0.16184
1527	-0.180602	-0.166793	-0.183586	-0.15586	-0.183792	-0.135745	-0.0850351	-0.17923	-0.176968	-0.182191	-0.195698	-0.226763	-0.104897	-0.160825	-0.169736	-0.139563	-0.174014	-0.210165	-0.198487	-0.167301	-0.178915	-0.233229	-0.116641	-0.184587	-0.205901	-0.14117	-0.165088	-0.2157	-0.151765	-0.219591	-0.220032	-0.136837	-0.188731	-0.176267	-0.168494	-0.14993	-0.175524	-0.160732	-0.170335	-0.163259	-0.128856	-0.156437	-0.181331	-0.163883	-0.171224	-0.15573	-0.185599	-0.180177	-0.161293
1529	-0.179869	-0.166728	-0.183071	-0.182888	-0.193435	-0.156179	-0.0887144	-0.183053	-0.175514	-0.173356	-0.205351	-0.233762	-0.126339	-0.163778	-0.177665	-0.142199	-0.167582	-0.20589	-0.20351	-0.175158	-0.189285	-0.237637	-0.0969856	-0.182995	-0.212125	-0.14954	-0.175095	-0.221386	-0.168867	-0.221529	-0.217872	-0.150771	-0.192068	-0.187388	-0.173942	-0.163557	-0.174876	-0.17607	-0.171961	-0.177935	-0.140177	-0.151443	-0.175694	-0.173945	-0.171197	-0.16345	-0.181302	-0.180341	-0.171722
1531	-0.178325	-0.166951	-0.183549	-0.205756	-0.202592	-0.178342	-0.0993493	-0.186369	-0.172596	-0.162585	-0.21976	-0.240272	-0.149011	-0.159649	-0.185842	-0.144175	-0.160533	-0.200734	-0.207227	-0.181395	-0.201674	-0.240878	-0.0763293	-0.180439	-0.213458	-0.159236	-0.181842	-0.225648	-0.186085	-0.224289	-0.215985	-0.168099	-0.192919	-0.196205	-0.179216	-0.173914	-0.175158	-0.186237	-0.173157	-0.186985	-0.148735	-0.1525	-0.171116	-0.180382	-0.171642	-0.170072	-0.181559	-0.178711	-0.179396
1533	-0.175101	-0.174783	-0.19111	-0.193384	-0.198123	-0.175007	-0.116586	-0.177587	-0.17028	-0.17019	-0.231083	-0.24113	-0.158682	-0.14117	-0.190445	-0.134292	-0.171108	-0.206829	-0.206349	-0.173038	-0.20447	-0.242141	-0.0749664	-0.179572	-0.21525	-0.176821	-0.17482	-0.226027	-0.186909	-0.246819	-0.222711	-0.212929	-0.194026	-0.199866	-0.184099	-0.176953	-0.177523	-0.184834	-0.173391	-0.183447	-0.151108	-0.167097	-0.168905	-0.178708	-0.173144	-0.174235	-0.19201	-0.173067	-0.180903
1535	-0.174195	-0.179237	-0.193761	-0.178455	-0.200291	-0.173364	-0.13236	-0.171937	-0.172287	-0.173804	-0.239353	-0.239197	-0.162507	-0.127237	-0.191929	-0.123209	-0.174661	-0.212949	-0.206763	-0.165436	-0.206743	-0.242121	-0.0879606	-0.177856	-0.218386	-0.184927	-0.171875	-0.226151	-0.189662	-0.258752	-0.229481	-0.229446	-0.196172	-0.199291	-0.185095	-0.172061	-0.176967	-0.175775	-0.171057	-0.180372	-0.151313	-0.168114	-0.166773	-0.182044	-0.174494	-0.174359	-0.195116	-0.175481	-0.181084
1537	-0.177114	-0.178117	-0.188313	-0.159308	-0.213406	-0.174514	-0.145722	-0.171452	-0.181427	-0.170834	-0.242583	-0.23266	-0.156687	-0.120802	-0.188267	-0.110146	-0.166633	-0.219111	-0.209305	-0.15908	-0.208156	-0.239981	-0.124638	-0.174742	-0.223742	-0.177396	-0.175657	-0.225857	-0.195598	-0.253202	-0.236323	-0.199258	-0.200032	-0.195558	-0.183195	-0.161259	-0.174235	-0.16101	-0.16681	-0.17764	-0.149902	-0.15901	-0.164698	-0.189112	-0.175731	-0.171473	-0.192749	-0.183901	-0.180276
1539	-0.17958	-0.172516	-0.187622	-0.154715	-0.218692	-0.176725	-0.145616	-0.175157	-0.18464	-0.167865	-0.242795	-0.230104	-0.150813	-0.118258	-0.183746	-0.091559	-0.159385	-0.214299	-0.210866	-0.154261	-0.209983	-0.236536	-0.146295	-0.176691	-0.224808	-0.168089	-0.177014	-0.223899	-0.196075	-0.241349	-0.231501	-0.172049	-0.200343	-0.19961	-0.178763	-0.157537	-0.171614	-0.151966	-0.165764	-0.167688	-0.136923	-0.139116	-0.16353	-0.181448	-0.174836	-0.156777	-0.190197	-0.182949	-0.179762
1541	-0.181793	-0.164412	-0.189589	-0.158254	-0.219605	-0.179528	-0.137988	-0.181204	-0.184541	-0.164899	-0.24132	-0.229772	-0.14491	-0.117887	-0.178745	-0.0698855	-0.152572	-0.203358	-0.211877	-0.150303	-0.212041	-0.232362	-0.15956	-0.181468	-0.223478	-0.157791	-0.177017	-0.221011	-0.193504	-0.225974	-0.220162	-0.146504	-0.198674	-0.204424	-0.173196	-0.15503	-0.169012	-0.141425	-0.165222	-0.155919	-0.12104	-0.117501	-0.162126	-0.170217	-0.173209	-0.137539	-0.187399	-0.179029	-0.179231
1543	-0.170441	-0.158811	-0.19041	-0.150277	-0.219892	-0.177241	-0.131819	-0.174032	-0.184918	-0.16499	-0.22853	-0.228153	-0.129438	-0.113293	-0.170071	-0.0525366	-0.14568	-0.195449	-0.208257	-0.134934	-0.209956	-0.225975	-0.138298	-0.180612	-0.215971	-0.156401	-0.177802	-0.217128	-0.186084	-0.225626	-0.217114	-0.119871	-0.195719	-0.202561	-0.161934	-0.151069	-0.166392	-0.107708	-0.163625	-0.140498	-0.0993489	-0.0992509	-0.157058	-0.152767	-0.168769	-0.0983683	-0.182741	-0.164956	-0.178035
1545	-0.159692	-0.153268	-0.190394	-0.137445	-0.21966	-0.172466	-0.125213	-0.164509	-0.185102	-0.162044	-0.215242	-0.225696	-0.111247	-0.107943	-0.16028	-0.0407143	-0.138513	-0.189467	-0.203575	-0.117816	-0.206495	-0.219062	-0.113047	-0.178152	-0.20796	-0.155114	-0.178968	-0.21246	-0.177176	-0.225222	-0.215196	-0.0911849	-0.192812	-0.19721	-0.151982	-0.141869	-0.163905	-0.0687882	-0.155794	-0.127904	-0.0818149	-0.0831992	-0.148778	-0.139875	-0.164244	-0.0616651	-0.177821	-0.152329	-0.17513
1547	-0.158779	-0.146746	-0.18687	-0.106757	-0.217212	-0.158124	-0.115729	-0.150221	-0.184104	-0.142719	-0.205272	-0.219802	-0.0846401	-0.101042	-0.146899	-0.0536806	-0.13004	-0.19135	-0.196062	-0.0979574	-0.198423	-0.210699	-0.0858498	-0.17072	-0.200628	-0.149805	-0.181596	-0.204459	-0.163472	-0.216909	-0.214587	-0.0530242	-0.190787	-0.1858	-0.144309	-0.123569	-0.161648	-0.0208276	-0.137133	-0.120222	-0.0715032	-0.0709662	-0.13492	-0.134902	-0.15957	-0.0292489	-0.172446	-0.142214	-0.169258
1549	-0.159404	-0.140453	-0.18309	-0.0794784	-0.21122	-0.1462	-0.0996207	-0.144659	-0.180407	-0.125199	-0.198965	-0.215257	-0.0734484	-0.0958614	-0.134866	-0.0639352	-0.125116	-0.187586	-0.189025	-0.0815768	-0.19189	-0.203617	-0.0597288	-0.163499	-0.192847	-0.144621	-0.179077	-0.198072	-0.148768	-0.209	-0.211742	-0.0218773	-0.189335	-0.181226	-0.145769	-0.111769	-0.158018	-0.0164148	-0.120342	-0.11877	-0.0638213	-0.0654142	-0.123274	-0.118173	-0.153302	-0.0167747	-0.167812	-0.129322	-0.164367
1551	-0.162033	-0.134459	-0.178973	-0.056643	-0.200611	-0.137428	-0.0748785	-0.150469	-0.173192	-0.110034	-0.197434	-0.212471	-0.0823463	-0.0929216	-0.124589	-0.0706558	-0.124819	-0.176462	-0.182607	-0.0697293	-0.187365	-0.198202	-0.03501	-0.156554	-0.184482	-0.139599	-0.169848	-0.193788	-0.132765	-0.201619	-0.20598	0.000129037	-0.188632	-0.180678	-0.152607	-0.103794	-0.153581	-0.03764	-0.104654	-0.120985	-0.0576875	-0.0637955	-0.112932	-0.0945251	-0.146096	-0.0160409	-0.163614	-0.114795	-0.160055
1553	-0.152347	-0.127095	-0.174355	-0.0405889	-0.193605	-0.129813	-0.0652547	-0.15785	-0.167927	-0.119138	-0.197148	-0.210726	-0.056856	-0.0956075	-0.125994	-0.0427774	-0.122514	-0.171716	-0.183732	-0.0637033	-0.1863	-0.200227	-0.0185296	-0.147825	-0.183697	-0.134224	-0.156225	-0.196555	-0.119545	-0.201922	-0.199041	-0.00466329	-0.185253	-0.178567	-0.148481	-0.0815052	-0.14917	-0.0413106	-0.0955785	-0.117964	-0.0489175	-0.0434073	-0.116313	-0.0935553	-0.145538	-0.0116642	-0.157967	-0.106589	-0.15809
1555	-0.137342	-0.11914	-0.16952	-0.0274636	-0.188157	-0.122698	-0.0621605	-0.16591	-0.163505	-0.138724	-0.197402	-0.20943	-0.0165133	-0.100723	-0.132443	4.4368e-05	-0.119341	-0.169725	-0.188115	-0.0601918	-0.186731	-0.205467	-0.00560728	-0.138326	-0.186187	-0.128697	-0.140703	-0.202367	-0.107527	-0.205543	-0.191594	-0.0210301	-0.180718	-0.176184	-0.144491	-0.0648509	-0.14579	-0.0404516	-0.0883622	-0.114109	-0.0416419	-0.0233272	-0.120616	-0.0970088	-0.145652	-0.0111276	-0.15409	-0.0998046	-0.15612
1557	-0.146073	-0.119731	-0.172985	-0.0264966	-0.185804	-0.124297	-0.0809307	-0.165876	-0.16332	-0.137795	-0.194091	-0.209804	-0.0311263	-0.105327	-0.1261	-0.0367283	-0.108452	-0.174387	-0.18319	-0.0671684	-0.17258	-0.203428	-0.0240292	-0.146782	-0.185178	-0.109903	-0.137419	-0.204241	-0.116675	-0.207984	-0.203066	-0.0279423	-0.178802	-0.173343	-0.148212	-0.0874118	-0.147899	-0.0265662	-0.0868704	-0.10913	-0.0440278	-0.01684	-0.121105	-0.109659	-0.145125	-0.0334259	-0.160594	-0.0965869	-0.152624
1559	-0.153889	-0.120686	-0.17605	-0.0295118	-0.183309	-0.125652	-0.0931975	-0.164087	-0.16362	-0.136069	-0.192034	-0.208902	-0.0512815	-0.109146	-0.121874	-0.0638231	-0.101598	-0.180036	-0.180272	-0.0730892	-0.161603	-0.201097	-0.0407413	-0.150123	-0.185476	-0.0936724	-0.135689	-0.206287	-0.126882	-0.214377	-0.20998	-0.0331047	-0.177292	-0.170656	-0.151239	-0.0931247	-0.151831	-0.0248755	-0.088715	-0.0986744	-0.047227	-0.0299707	-0.118698	-0.123872	-0.144956	-0.0445331	-0.161577	-0.0963369	-0.151136
1561	-0.155438	-0.121743	-0.17665	-0.0444936	-0.179917	-0.125017	-0.0803875	-0.157385	-0.165005	-0.134344	-0.194725	-0.203429	-0.0830468	-0.110357	-0.126565	-0.047359	-0.109524	-0.188169	-0.185433	-0.0740188	-0.16338	-0.198732	-0.0474654	-0.133642	-0.190696	-0.0879387	-0.137634	-0.20944	-0.137892	-0.234405	-0.19884	-0.0335542	-0.176815	-0.168179	-0.153316	-0.0757404	-0.158263	-0.0399025	-0.0951338	-0.08071	-0.0515413	-0.0699958	-0.112321	-0.140226	-0.145277	-0.0402981	-0.154992	-0.100155	-0.1524
1563	-0.156075	-0.121913	-0.175918	-0.0450953	-0.176682	-0.12653	-0.0771111	-0.155944	-0.162133	-0.139663	-0.190799	-0.201326	-0.10341	-0.11524	-0.130637	-0.0456487	-0.11542	-0.193877	-0.184323	-0.0845583	-0.166904	-0.198463	-0.039073	-0.132408	-0.198961	-0.0968043	-0.129742	-0.209433	-0.132968	-0.236152	-0.198153	-0.031447	-0.179585	-0.170448	-0.154647	-0.0814319	-0.162201	-0.0728028	-0.103918	-0.0891794	-0.058367	-0.0847547	-0.118349	-0.146352	-0.14519	-0.0551633	-0.154501	-0.103561	-0.149216
1565	-0.155766	-0.121164	-0.173804	-0.0307862	-0.173608	-0.130267	-0.0837201	-0.159958	-0.154848	-0.152286	-0.180012	-0.202718	-0.111949	-0.12393	-0.134069	-0.0592365	-0.11921	-0.197071	-0.176712	-0.105062	-0.17224	-0.200369	-0.0150064	-0.146983	-0.210382	-0.120808	-0.11165	-0.20615	-0.111521	-0.218943	-0.208304	-0.026689	-0.18572	-0.174891	-0.155636	-0.097691	-0.164998	-0.113888	-0.113785	-0.109754	-0.0663428	-0.0879429	-0.130058	-0.147794	-0.144915	-0.0787754	-0.1568	-0.106779	-0.143994
1567	-0.16547	-0.128609	-0.173267	-0.0621588	-0.179071	-0.125268	-0.0893457	-0.174404	-0.150159	-0.156808	-0.178296	-0.198632	-0.120289	-0.145262	-0.142079	-0.0930477	-0.124961	-0.193777	-0.182342	-0.122502	-0.173363	-0.201426	-0.0347874	-0.142822	-0.206265	-0.114755	-0.114196	-0.204472	-0.131642	-0.229937	-0.209398	-0.0687304	-0.187356	-0.186313	-0.1489	-0.131911	-0.164719	-0.140349	-0.135319	-0.105647	-0.0809941	-0.116696	-0.147897	-0.172858	-0.147085	-0.0997553	-0.164164	-0.119091	-0.146457
1569	-0.178135	-0.138626	-0.173388	-0.107487	-0.187043	-0.117898	-0.0950095	-0.191757	-0.146804	-0.158871	-0.179667	-0.192808	-0.128829	-0.170068	-0.15167	-0.132479	-0.131408	-0.188369	-0.192179	-0.138755	-0.17332	-0.202336	-0.06826	-0.133073	-0.197355	-0.0994749	-0.123437	-0.203416	-0.164332	-0.249743	-0.207443	-0.125037	-0.187623	-0.196419	-0.144308	-0.161675	-0.164979	-0.158304	-0.155196	-0.102353	-0.0950922	-0.139771	-0.163189	-0.192683	-0.151156	-0.117953	-0.171218	-0.130151	-0.149824
1571	-0.176283	-0.144321	-0.181002	-0.109297	-0.181874	-0.133979	-0.118793	-0.184891	-0.168379	-0.169421	-0.188474	-0.188971	-0.150832	-0.163112	-0.16613	-0.124321	-0.140895	-0.182456	-0.197612	-0.145267	-0.183417	-0.209787	-0.0750113	-0.148084	-0.200812	-0.110582	-0.132819	-0.207512	-0.150931	-0.252673	-0.199809	-0.135156	-0.19254	-0.200346	-0.149075	-0.171618	-0.167815	-0.147861	-0.16674	-0.106811	-0.105871	-0.137071	-0.167949	-0.188717	-0.161733	-0.126447	-0.176156	-0.134854	-0.155028
1573	-0.171357	-0.148612	-0.185995	-0.113899	-0.180555	-0.145924	-0.135162	-0.180752	-0.183202	-0.178773	-0.194713	-0.185161	-0.164662	-0.15905	-0.177421	-0.113485	-0.145789	-0.179772	-0.202147	-0.153349	-0.194095	-0.216378	-0.082742	-0.165273	-0.204825	-0.122417	-0.140701	-0.21175	-0.146971	-0.250296	-0.195589	-0.145475	-0.19517	-0.201342	-0.158732	-0.180172	-0.169497	-0.143517	-0.172115	-0.109668	-0.117584	-0.139125	-0.169645	-0.186441	-0.171303	-0.13994	-0.179365	-0.143527	-0.158165
1575	-0.15866	-0.149353	-0.184363	-0.125552	-0.188968	-0.147414	-0.132791	-0.183508	-0.18096	-0.185098	-0.194463	-0.181424	-0.157838	-0.162302	-0.180702	-0.0958813	-0.139081	-0.185245	-0.204412	-0.165404	-0.206244	-0.220796	-0.0929479	-0.187963	-0.210242	-0.136091	-0.144794	-0.216344	-0.166871	-0.234504	-0.199997	-0.156304	-0.19202	-0.19914	-0.173725	-0.187212	-0.169921	-0.145827	-0.170758	-0.11078	-0.130318	-0.146364	-0.167998	-0.186008	-0.179773	-0.158888	-0.180687	-0.156529	-0.159047
1577	-0.160391	-0.154564	-0.179942	-0.142719	-0.191263	-0.152686	-0.128342	-0.184452	-0.181926	-0.183936	-0.189606	-0.181021	-0.156564	-0.163211	-0.180068	-0.100184	-0.13909	-0.18847	-0.207339	-0.180258	-0.212825	-0.223348	-0.111893	-0.194857	-0.21133	-0.138633	-0.150782	-0.218504	-0.175548	-0.227653	-0.202676	-0.162235	-0.191409	-0.201415	-0.185364	-0.182224	-0.178505	-0.159146	-0.178802	-0.120697	-0.144069	-0.159367	-0.180325	-0.185728	-0.187161	-0.1729	-0.186321	-0.170782	-0.164324
1579	-0.174036	-0.163466	-0.173218	-0.164439	-0.188505	-0.16108	-0.122177	-0.183901	-0.18554	-0.176592	-0.180943	-0.183374	-0.159875	-0.162186	-0.176199	-0.122576	-0.144646	-0.189839	-0.210811	-0.197424	-0.214807	-0.22436	-0.138054	-0.188707	-0.208841	-0.131983	-0.158334	-0.218655	-0.174959	-0.228186	-0.203928	-0.164121	-0.192895	-0.205251	-0.195783	-0.173117	-0.18989	-0.176183	-0.190088	-0.133693	-0.15821	-0.174296	-0.197443	-0.185561	-0.194167	-0.185163	-0.193417	-0.185401	-0.171091
1581	-0.179976	-0.171288	-0.179584	-0.182281	-0.18872	-0.156975	-0.130016	-0.184578	-0.189021	-0.175633	-0.187052	-0.190615	-0.165618	-0.157521	-0.175549	-0.13278	-0.162321	-0.193236	-0.214932	-0.200235	-0.216777	-0.2283	-0.147474	-0.187638	-0.211485	-0.136945	-0.162909	-0.221844	-0.173872	-0.225324	-0.205048	-0.16767	-0.197849	-0.21029	-0.197475	-0.172414	-0.196474	-0.177546	-0.19835	-0.150147	-0.178079	-0.178041	-0.205524	-0.194715	-0.200442	-0.191701	-0.195247	-0.189657	-0.172667
1583	-0.183741	-0.178406	-0.188285	-0.197579	-0.190319	-0.150514	-0.140489	-0.185296	-0.191913	-0.176227	-0.196536	-0.199192	-0.170989	-0.152766	-0.176917	-0.139201	-0.182184	-0.196966	-0.219107	-0.199477	-0.218498	-0.233001	-0.15245	-0.18758	-0.215601	-0.144543	-0.166936	-0.225409	-0.172683	-0.221976	-0.206609	-0.171025	-0.203264	-0.214835	-0.19822	-0.173594	-0.201958	-0.180163	-0.204528	-0.167972	-0.195347	-0.180761	-0.210159	-0.203578	-0.205569	-0.196843	-0.197706	-0.193585	-0.175128
1585	-0.182757	-0.179991	-0.188527	-0.192898	-0.200369	-0.150621	-0.143533	-0.183034	-0.188014	-0.177693	-0.205459	-0.210228	-0.164987	-0.157165	-0.193737	-0.133972	-0.19453	-0.19903	-0.222122	-0.195776	-0.217226	-0.238717	-0.150549	-0.185494	-0.223151	-0.151465	-0.172682	-0.224991	-0.17164	-0.222278	-0.213898	-0.167341	-0.204519	-0.218045	-0.196411	-0.17985	-0.204472	-0.186159	-0.205088	-0.189493	-0.205607	-0.180716	-0.205507	-0.211655	-0.207605	-0.19822	-0.201861	-0.19663	-0.179978
1587	-0.183646	-0.182286	-0.188152	-0.188903	-0.208562	-0.158062	-0.14825	-0.181605	-0.184393	-0.177535	-0.210535	-0.219243	-0.164709	-0.160298	-0.207414	-0.133842	-0.202064	-0.200874	-0.223914	-0.194062	-0.210653	-0.242127	-0.152484	-0.185075	-0.227337	-0.158571	-0.177313	-0.223592	-0.171742	-0.228311	-0.219814	-0.161163	-0.205628	-0.21925	-0.196261	-0.188684	-0.205719	-0.193361	-0.2055	-0.203857	-0.210109	-0.182757	-0.201736	-0.210759	-0.209434	-0.196819	-0.206794	-0.199577	-0.187073
1589	-0.188163	-0.185957	-0.186581	-0.186241	-0.213155	-0.179724	-0.156214	-0.181789	-0.18131	-0.174225	-0.208154	-0.224343	-0.175527	-0.160973	-0.214996	-0.143596	-0.200271	-0.202292	-0.223332	-0.1962	-0.193804	-0.241065	-0.161858	-0.187887	-0.225	-0.166034	-0.179783	-0.220291	-0.174061	-0.245453	-0.223067	-0.150146	-0.206453	-0.21871	-0.197553	-0.19976	-0.205863	-0.201613	-0.205784	-0.211994	-0.209602	-0.186613	-0.198732	-0.202053	-0.211083	-0.193	-0.212404	-0.202439	-0.19612
1591	-0.190391	-0.186562	-0.192142	-0.185551	-0.215288	-0.194118	-0.156877	-0.187617	-0.184989	-0.179368	-0.209434	-0.22741	-0.187681	-0.160979	-0.212103	-0.148902	-0.195091	-0.204546	-0.222318	-0.192478	-0.175434	-0.238087	-0.170743	-0.192314	-0.221029	-0.172045	-0.181916	-0.221566	-0.184214	-0.252691	-0.221251	-0.137311	-0.20903	-0.219639	-0.200298	-0.20844	-0.206653	-0.198504	-0.198901	-0.204481	-0.202881	-0.184635	-0.200151	-0.198321	-0.213793	-0.182767	-0.214545	-0.206598	-0.201139
1593	-0.191123	-0.18516	-0.202368	-0.186152	-0.215812	-0.203757	-0.152762	-0.197138	-0.193091	-0.190044	-0.213108	-0.229149	-0.200709	-0.160547	-0.202355	-0.151296	-0.187697	-0.207345	-0.221021	-0.184921	-0.156068	-0.233854	-0.179307	-0.197797	-0.215987	-0.177106	-0.183828	-0.225837	-0.199494	-0.253448	-0.216119	-0.123284	-0.212753	-0.221173	-0.202856	-0.216128	-0.207645	-0.193019	-0.191543	-0.193426	-0.195257	-0.182236	-0.202783	-0.195473	-0.216457	-0.171712	-0.215655	-0.211189	-0.205168
1595	-0.19947	-0.185976	-0.200018	-0.178266	-0.216395	-0.205184	-0.142364	-0.196617	-0.201734	-0.195811	-0.228874	-0.236576	-0.195121	-0.156587	-0.203578	-0.127777	-0.199905	-0.206917	-0.227202	-0.180106	-0.157495	-0.235894	-0.164922	-0.188467	-0.214549	-0.176748	-0.199548	-0.225741	-0.205425	-0.255381	-0.21793	-0.13396	-0.213057	-0.22621	-0.197168	-0.218022	-0.209236	-0.194751	-0.203988	-0.188302	-0.197462	-0.195454	-0.206889	-0.187157	-0.214445	-0.172471	-0.214421	-0.217358	-0.209589
1597	-0.207827	-0.186772	-0.195937	-0.170841	-0.215723	-0.206046	-0.133151	-0.19409	-0.208886	-0.197808	-0.242859	-0.24262	-0.187709	-0.152046	-0.205239	-0.105013	-0.211645	-0.207237	-0.233527	-0.177978	-0.162427	-0.23824	-0.153719	-0.179546	-0.21408	-0.176197	-0.214027	-0.224383	-0.208382	-0.256148	-0.222211	-0.147609	-0.212784	-0.229573	-0.195517	-0.209974	-0.210215	-0.199681	-0.208755	-0.192403	-0.200941	-0.203526	-0.209238	-0.181814	-0.213082	-0.175995	-0.211615	-0.217839	-0.211022
1599	-0.208741	-0.185248	-0.19297	-0.174801	-0.206807	-0.211328	-0.137877	-0.18838	-0.20577	-0.180037	-0.23329	-0.234017	-0.186757	-0.147208	-0.198936	-0.112754	-0.200986	-0.215633	-0.233419	-0.190686	-0.169719	-0.236407	-0.185943	-0.187919	-0.216377	-0.179746	-0.206777	-0.219099	-0.201166	-0.248139	-0.235762	-0.156292	-0.212124	-0.229492	-0.202176	-0.181469	-0.209936	-0.211192	-0.197726	-0.215487	-0.207043	-0.201009	-0.207969	-0.18259	-0.213055	-0.185207	-0.205574	-0.206616	-0.206308
1601	-0.211944	-0.182932	-0.198324	-0.188994	-0.204191	-0.210169	-0.142527	-0.188876	-0.203582	-0.170129	-0.225534	-0.229095	-0.179267	-0.15139	-0.195808	-0.122325	-0.192775	-0.218337	-0.233326	-0.193535	-0.184506	-0.237283	-0.209174	-0.195882	-0.222158	-0.178929	-0.201684	-0.221516	-0.196989	-0.246785	-0.24648	-0.165878	-0.213963	-0.229573	-0.206779	-0.181811	-0.209885	-0.211167	-0.205025	-0.216788	-0.20625	-0.193752	-0.207779	-0.186145	-0.218232	-0.184167	-0.203356	-0.204483	-0.205552
1603	-0.218624	-0.179413	-0.216316	-0.21873	-0.211141	-0.199231	-0.147062	-0.198797	-0.202802	-0.17216	-0.220533	-0.229763	-0.161847	-0.169272	-0.197503	-0.134675	-0.188282	-0.212397	-0.233258	-0.181412	-0.210676	-0.242275	-0.218748	-0.203224	-0.23323	-0.171484	-0.199865	-0.235629	-0.19743	-0.255536	-0.252895	-0.176835	-0.219595	-0.229765	-0.20996	-0.202102	-0.209992	-0.203166	-0.225001	-0.203023	-0.200689	-0.183218	-0.208334	-0.191621	-0.227007	-0.176037	-0.203781	-0.208635	-0.207533
1605	-0.218031	-0.181108	-0.228355	-0.21756	-0.221544	-0.187943	-0.144284	-0.199809	-0.203255	-0.178379	-0.227316	-0.237396	-0.177191	-0.167146	-0.200792	-0.135681	-0.196102	-0.214723	-0.238393	-0.175203	-0.22183	-0.240997	-0.194575	-0.205341	-0.225679	-0.164664	-0.202054	-0.234461	-0.205145	-0.260736	-0.256295	-0.168256	-0.217567	-0.225658	-0.213726	-0.198928	-0.21716	-0.212037	-0.224423	-0.202592	-0.192942	-0.190867	-0.215294	-0.216352	-0.226225	-0.195538	-0.208216	-0.200672	-0.215822
1607	-0.213711	-0.185475	-0.237344	-0.200556	-0.233718	-0.176476	-0.137757	-0.196256	-0.204341	-0.186745	-0.240136	-0.248598	-0.209321	-0.154771	-0.204899	-0.130877	-0.210231	-0.221284	-0.246192	-0.172024	-0.225292	-0.236508	-0.153113	-0.204782	-0.208589	-0.158164	-0.206296	-0.225466	-0.216587	-0.264115	-0.25815	-0.149668	-0.211616	-0.223557	-0.216756	-0.191388	-0.224698	-0.218273	-0.220848	-0.203623	-0.18581	-0.20023	-0.221822	-0.239193	-0.224256	-0.215961	-0.213215	-0.1937	-0.224089
1609	-0.211595	-0.190483	-0.219864	-0.191939	-0.22206	-0.177191	-0.137922	-0.191437	-0.214074	-0.187897	-0.242966	-0.249949	-0.197228	-0.162074	-0.198857	-0.135541	-0.203501	-0.224123	-0.242486	-0.164176	-0.225948	-0.242296	-0.129238	-0.20691	-0.227619	-0.183431	-0.214996	-0.231765	-0.213103	-0.259726	-0.248784	-0.175196	-0.216395	-0.241617	-0.213643	-0.180929	-0.226156	-0.184005	-0.220816	-0.198789	-0.185946	-0.19954	-0.217168	-0.224079	-0.22545	-0.208706	-0.217373	-0.209159	-0.22432
1611	-0.210127	-0.195309	-0.204268	-0.188191	-0.21107	-0.181944	-0.140958	-0.186801	-0.223869	-0.189578	-0.242352	-0.250004	-0.179086	-0.168616	-0.194001	-0.140866	-0.197198	-0.224548	-0.238332	-0.160974	-0.227488	-0.24915	-0.115883	-0.209319	-0.244285	-0.206441	-0.221564	-0.236776	-0.20957	-0.256523	-0.238217	-0.203191	-0.222819	-0.252193	-0.212879	-0.182854	-0.225707	-0.169637	-0.215176	-0.196586	-0.190447	-0.194666	-0.218857	-0.214262	-0.229288	-0.208211	-0.22222	-0.217068	-0.224679
1613	-0.210671	-0.199133	-0.205849	-0.202363	-0.211143	-0.199757	-0.153961	-0.183384	-0.230952	-0.196007	-0.230454	-0.247909	-0.150316	-0.165128	-0.197713	-0.145752	-0.199899	-0.215945	-0.236221	-0.179235	-0.233772	-0.257021	-0.14143	-0.212008	-0.238405	-0.208867	-0.217492	-0.231018	-0.210969	-0.261061	-0.226386	-0.226536	-0.232576	-0.250739	-0.215894	-0.204688	-0.222191	-0.187255	-0.20052	-0.198611	-0.201965	-0.183067	-0.230742	-0.212958	-0.237379	-0.218583	-0.228174	-0.21284	-0.225243
1615	-0.210314	-0.201166	-0.209662	-0.2055	-0.212065	-0.202756	-0.157252	-0.18137	-0.227716	-0.201939	-0.225183	-0.246331	-0.144357	-0.171042	-0.199989	-0.145238	-0.199143	-0.216621	-0.232108	-0.194921	-0.233875	-0.261745	-0.168394	-0.213357	-0.235515	-0.209456	-0.212698	-0.225296	-0.212525	-0.265182	-0.227631	-0.224953	-0.232332	-0.24838	-0.217219	-0.209436	-0.220071	-0.196695	-0.194559	-0.20496	-0.210839	-0.181405	-0.231803	-0.216756	-0.236821	-0.212452	-0.238175	-0.209856	-0.221132
1617	-0.208871	-0.201044	-0.216163	-0.195355	-0.214008	-0.187925	-0.148854	-0.181046	-0.212059	-0.207272	-0.227886	-0.245376	-0.165853	-0.188273	-0.200539	-0.138226	-0.194226	-0.228463	-0.225586	-0.20751	-0.226539	-0.262682	-0.197062	-0.213093	-0.236224	-0.207834	-0.207035	-0.219616	-0.214269	-0.268798	-0.244616	-0.193366	-0.22005	-0.245528	-0.217625	-0.204889	-0.218709	-0.201686	-0.193328	-0.213662	-0.218275	-0.18515	-0.226974	-0.223329	-0.231558	-0.197342	-0.250378	-0.20755	-0.214478
1619	-0.210831	-0.19768	-0.213632	-0.190802	-0.214564	-0.184195	-0.143609	-0.182735	-0.206192	-0.193803	-0.235523	-0.247646	-0.170224	-0.188106	-0.198927	-0.136764	-0.194871	-0.231795	-0.223604	-0.200342	-0.222831	-0.252771	-0.181365	-0.213462	-0.238474	-0.195008	-0.187632	-0.225558	-0.212643	-0.2643	-0.253819	-0.179301	-0.217146	-0.246123	-0.216222	-0.217937	-0.220126	-0.20062	-0.207616	-0.212285	-0.215754	-0.207592	-0.226771	-0.229579	-0.230931	-0.204198	-0.252187	-0.209161	-0.213349
1621	-0.214129	-0.193043	-0.207555	-0.188444	-0.214575	-0.184826	-0.139602	-0.185216	-0.20417	-0.172948	-0.245098	-0.251181	-0.16787	-0.181105	-0.196467	-0.137482	-0.197701	-0.231784	-0.223405	-0.185415	-0.220549	-0.238601	-0.148243	-0.214079	-0.24133	-0.177781	-0.162831	-0.236064	-0.209694	-0.256614	-0.259966	-0.172117	-0.217926	-0.247467	-0.215677	-0.231863	-0.22215	-0.198804	-0.221212	-0.209684	-0.213912	-0.227285	-0.227795	-0.234962	-0.231517	-0.210786	-0.252816	-0.211709	-0.213912
1623	-0.21527	-0.188813	-0.210469	-0.172266	-0.212688	-0.197283	-0.141369	-0.18967	-0.200911	-0.170281	-0.249392	-0.261618	-0.151792	-0.173633	-0.197569	-0.138069	-0.194457	-0.226946	-0.233974	-0.191105	-0.221481	-0.235312	-0.142723	-0.211979	-0.236163	-0.17841	-0.171315	-0.238417	-0.202954	-0.2555	-0.252255	-0.161051	-0.216707	-0.250759	-0.219974	-0.241924	-0.225758	-0.19622	-0.224519	-0.205921	-0.219763	-0.225613	-0.232468	-0.236429	-0.235681	-0.20615	-0.25262	-0.216877	-0.2199
1625	-0.213275	-0.184724	-0.212794	-0.163138	-0.210178	-0.206068	-0.143959	-0.193856	-0.201255	-0.168791	-0.252829	-0.269022	-0.136553	-0.16612	-0.197274	-0.138511	-0.191584	-0.222221	-0.242549	-0.198006	-0.222585	-0.234466	-0.141483	-0.210884	-0.230881	-0.178252	-0.179131	-0.239329	-0.198492	-0.255175	-0.245547	-0.152112	-0.216126	-0.253037	-0.22272	-0.245542	-0.229372	-0.198249	-0.228016	-0.202057	-0.223287	-0.221399	-0.235569	-0.237056	-0.238901	-0.206533	-0.252018	-0.223766	-0.225952
1627	-0.201809	-0.181048	-0.212818	-0.176343	-0.205867	-0.202964	-0.148744	-0.197108	-0.212687	-0.169893	-0.253936	-0.26677	-0.124642	-0.158507	-0.192505	-0.138519	-0.190187	-0.21811	-0.244426	-0.207466	-0.22404	-0.240491	-0.151806	-0.213013	-0.225696	-0.174694	-0.18306	-0.23629	-0.201209	-0.256899	-0.242679	-0.149892	-0.217605	-0.254023	-0.223494	-0.24096	-0.232996	-0.206148	-0.231755	-0.198062	-0.223852	-0.213949	-0.236671	-0.236615	-0.24092	-0.213306	-0.250899	-0.232845	-0.232084
1629	-0.194964	-0.181553	-0.212045	-0.184118	-0.206177	-0.195999	-0.147823	-0.196863	-0.218062	-0.171734	-0.254497	-0.262276	-0.125369	-0.157873	-0.192327	-0.131482	-0.187236	-0.215826	-0.244113	-0.213645	-0.224996	-0.243326	-0.156579	-0.212319	-0.221378	-0.172713	-0.184075	-0.232363	-0.20027	-0.259547	-0.245452	-0.153138	-0.218821	-0.255106	-0.222533	-0.239018	-0.237128	-0.211122	-0.234973	-0.19766	-0.220484	-0.214457	-0.236793	-0.240316	-0.242073	-0.222373	-0.249327	-0.23802	-0.235282
1631	-0.192548	-0.186067	-0.210509	-0.186688	-0.210916	-0.185332	-0.141433	-0.193267	-0.217629	-0.174282	-0.254535	-0.255634	-0.13821	-0.163929	-0.196551	-0.117692	-0.182797	-0.215293	-0.2417	-0.216677	-0.225476	-0.243104	-0.156032	-0.208919	-0.217892	-0.172244	-0.182297	-0.227585	-0.195825	-0.263083	-0.25363	-0.161624	-0.219785	-0.256229	-0.220843	-0.238186	-0.241473	-0.214866	-0.237971	-0.198768	-0.215463	-0.218309	-0.236504	-0.245758	-0.242862	-0.232405	-0.247566	-0.241555	-0.237247
1633	-0.19816	-0.188162	-0.213716	-0.17748	-0.213738	-0.173649	-0.133862	-0.187774	-0.213751	-0.180004	-0.254921	-0.254638	-0.161875	-0.162173	-0.204517	-0.1089	-0.182998	-0.219427	-0.24334	-0.214413	-0.224937	-0.239547	-0.150565	-0.209083	-0.21953	-0.173149	-0.188439	-0.226684	-0.187878	-0.262136	-0.255938	-0.160016	-0.219139	-0.259807	-0.22172	-0.231	-0.245177	-0.21834	-0.237177	-0.208728	-0.218018	-0.220384	-0.239681	-0.248843	-0.244966	-0.228604	-0.245637	-0.242481	-0.236287
1635	-0.205852	-0.189362	-0.218197	-0.165774	-0.215992	-0.162546	-0.126695	-0.182141	-0.209235	-0.186065	-0.255356	-0.255341	-0.187401	-0.158206	-0.213216	-0.101664	-0.18498	-0.225126	-0.246187	-0.210377	-0.22418	-0.235338	-0.143418	-0.210601	-0.222838	-0.174644	-0.196763	-0.227279	-0.179541	-0.260014	-0.256596	-0.155471	-0.21805	-0.263187	-0.223078	-0.222173	-0.247958	-0.222104	-0.23584	-0.217871	-0.222791	-0.221889	-0.243078	-0.250984	-0.2476	-0.224674	-0.244693	-0.242982	-0.236725
1637	-0.207288	-0.185821	-0.220074	-0.176908	-0.217992	-0.17303	-0.137955	-0.18663	-0.213656	-0.177758	-0.254499	-0.257473	-0.181219	-0.155682	-0.21316	-0.0969433	-0.197635	-0.236015	-0.24973	-0.200609	-0.225323	-0.238941	-0.130079	-0.219947	-0.230554	-0.180845	-0.202096	-0.236963	-0.186721	-0.261052	-0.258671	-0.150847	-0.217562	-0.265649	-0.225746	-0.208617	-0.247759	-0.226855	-0.233125	-0.223358	-0.234071	-0.221703	-0.246827	-0.250264	-0.25184	-0.221819	-0.247022	-0.242361	-0.242103
1639	-0.209901	-0.184897	-0.220961	-0.187325	-0.222844	-0.184271	-0.147845	-0.190342	-0.218004	-0.173256	-0.251858	-0.259484	-0.179413	-0.155642	-0.214462	-0.0929561	-0.204409	-0.243179	-0.252286	-0.192146	-0.227772	-0.242259	-0.12372	-0.223935	-0.23362	-0.188516	-0.203737	-0.243161	-0.196398	-0.260725	-0.260641	-0.154518	-0.217442	-0.266318	-0.228017	-0.212556	-0.24748	-0.225307	-0.227195	-0.222311	-0.239405	-0.220627	-0.249636	-0.256028	-0.254692	-0.223417	-0.25052	-0.242038	-0.24733
1641	-0.215215	-0.189988	-0.219575	-0.19609	-0.234256	-0.197254	-0.154589	-0.192269	-0.222185	-0.177501	-0.245116	-0.261214	-0.187663	-0.161309	-0.218883	-0.0906543	-0.197663	-0.241784	-0.252572	-0.186683	-0.23322	-0.244918	-0.133403	-0.215607	-0.225996	-0.199567	-0.196887	-0.241346	-0.211819	-0.257256	-0.262368	-0.177258	-0.218165	-0.265167	-0.229886	-0.234241	-0.24712	-0.217369	-0.218004	-0.214635	-0.23871	-0.218649	-0.251492	-0.268368	-0.256136	-0.229532	-0.255205	-0.242017	-0.252404
1643	-0.218117	-0.186561	-0.218769	-0.19535	-0.239458	-0.202816	-0.15739	-0.186108	-0.221369	-0.186093	-0.245243	-0.262141	-0.188267	-0.165166	-0.21714	-0.09114	-0.197094	-0.240107	-0.252497	-0.184357	-0.235332	-0.24609	-0.144489	-0.204281	-0.225648	-0.198243	-0.195754	-0.24016	-0.220381	-0.259864	-0.259863	-0.178753	-0.219681	-0.263318	-0.232604	-0.238906	-0.246263	-0.222948	-0.221458	-0.217276	-0.230046	-0.214881	-0.252813	-0.276963	-0.25417	-0.234083	-0.257345	-0.242811	-0.25026
1645	-0.21918	-0.176638	-0.218407	-0.187362	-0.239926	-0.202717	-0.157184	-0.173779	-0.216743	-0.197999	-0.25061	-0.262455	-0.183039	-0.167643	-0.210697	-0.0937514	-0.201236	-0.238216	-0.252147	-0.184425	-0.234899	-0.246128	-0.156644	-0.190668	-0.230849	-0.187484	-0.19898	-0.239454	-0.223711	-0.267105	-0.254132	-0.164046	-0.221802	-0.26131	-0.235458	-0.23759	-0.245272	-0.232074	-0.228695	-0.222654	-0.219132	-0.2105	-0.253785	-0.283608	-0.251236	-0.237298	-0.258777	-0.24378	-0.245916
1647	-0.221104	-0.184921	-0.217621	-0.181301	-0.229285	-0.203813	-0.156327	-0.175625	-0.214659	-0.195787	-0.253604	-0.262205	-0.173015	-0.166824	-0.216158	-0.0938247	-0.203713	-0.234597	-0.252358	-0.199373	-0.238925	-0.246244	-0.16705	-0.199407	-0.233022	-0.184311	-0.196661	-0.24099	-0.210042	-0.266156	-0.257073	-0.177155	-0.226741	-0.261706	-0.233127	-0.211708	-0.24518	-0.213211	-0.228115	-0.207873	-0.218448	-0.20421	-0.247589	-0.259848	-0.252508	-0.207195	-0.263896	-0.241517	-0.244442
1649	-0.222672	-0.195469	-0.217746	-0.175637	-0.218032	-0.204652	-0.153162	-0.178861	-0.213398	-0.190586	-0.255596	-0.262388	-0.16175	-0.165128	-0.224029	-0.0958562	-0.205898	-0.231437	-0.252931	-0.214896	-0.243827	-0.24752	-0.174452	-0.212428	-0.233909	-0.18392	-0.192818	-0.243082	-0.195193	-0.263609	-0.261105	-0.191513	-0.231746	-0.262381	-0.236869	-0.197369	-0.245435	-0.202803	-0.230102	-0.200903	-0.216551	-0.200325	-0.242892	-0.244356	-0.253992	-0.189744	-0.267641	-0.240559	-0.244567
1651	-0.219221	-0.192561	-0.227301	-0.170033	-0.222262	-0.200776	-0.129428	-0.168085	-0.215039	-0.18416	-0.252667	-0.267739	-0.147938	-0.161465	-0.231878	-0.121245	-0.208519	-0.235933	-0.255858	-0.207371	-0.248476	-0.259596	-0.156808	-0.223112	-0.228437	-0.195275	-0.185189	-0.246144	-0.201745	-0.261632	-0.25885	-0.164431	-0.231978	-0.263742	-0.255568	-0.211455	-0.246547	-0.213216	-0.23841	-0.213169	-0.211666	-0.202362	-0.241889	-0.249223	-0.255998	-0.203455	-0.268004	-0.242812	-0.24863
1653	-0.221089	-0.191876	-0.23329	-0.167055	-0.226992	-0.199075	-0.12195	-0.167441	-0.21669	-0.181415	-0.248756	-0.268699	-0.14291	-0.165221	-0.232605	-0.14323	-0.210561	-0.235788	-0.258398	-0.201817	-0.246084	-0.264041	-0.145487	-0.226539	-0.220898	-0.199201	-0.187651	-0.251163	-0.208178	-0.263483	-0.257708	-0.15074	-0.237336	-0.26998	-0.265571	-0.216216	-0.248691	-0.219256	-0.241184	-0.219576	-0.211411	-0.204329	-0.241196	-0.25202	-0.258934	-0.21701	-0.269113	-0.241677	-0.251977
1655	-0.232418	-0.195141	-0.232935	-0.168746	-0.232611	-0.201244	-0.143385	-0.184817	-0.218359	-0.185214	-0.243096	-0.261853	-0.153506	-0.18217	-0.220665	-0.159159	-0.211572	-0.227387	-0.26025	-0.19977	-0.23117	-0.254916	-0.145412	-0.217057	-0.209685	-0.189913	-0.208057	-0.259663	-0.214401	-0.272142	-0.258544	-0.160864	-0.25181	-0.280161	-0.268543	-0.213436	-0.251669	-0.221759	-0.239481	-0.221244	-0.2149	-0.206239	-0.240754	-0.253144	-0.262622	-0.230441	-0.270826	-0.237802	-0.254745
1657	-0.236645	-0.205998	-0.230672	-0.168046	-0.239464	-0.208285	-0.160695	-0.187829	-0.221071	-0.198294	-0.233052	-0.263795	-0.173705	-0.178164	-0.219411	-0.155916	-0.212153	-0.225197	-0.263119	-0.203243	-0.230692	-0.254949	-0.148357	-0.209256	-0.204871	-0.2052	-0.221537	-0.266178	-0.216013	-0.273422	-0.259115	-0.174168	-0.253561	-0.276101	-0.263413	-0.230762	-0.24939	-0.224844	-0.229365	-0.229968	-0.221825	-0.220154	-0.244488	-0.274262	-0.268153	-0.223936	-0.278213	-0.240327	-0.255393
1659	-0.236593	-0.221429	-0.227259	-0.165905	-0.24706	-0.21826	-0.175521	-0.182192	-0.224412	-0.216965	-0.220365	-0.271031	-0.199687	-0.161536	-0.224594	-0.141126	-0.212475	-0.226748	-0.2666	-0.210039	-0.238907	-0.260497	-0.153123	-0.202468	-0.203912	-0.23529	-0.230847	-0.2715	-0.214847	-0.270259	-0.259526	-0.189388	-0.24765	-0.269508	-0.256125	-0.249208	-0.246271	-0.228316	-0.218644	-0.23833	-0.228729	-0.234842	-0.248843	-0.295869	-0.272736	-0.21381	-0.284904	-0.244019	-0.255352
1661	-0.227811	-0.2141	-0.241273	-0.187954	-0.248601	-0.211713	-0.178913	-0.196461	-0.216884	-0.209921	-0.237905	-0.274899	-0.194472	-0.16219	-0.225757	-0.135296	-0.213605	-0.228953	-0.265865	-0.196815	-0.243502	-0.265195	-0.149467	-0.214861	-0.217752	-0.226523	-0.218035	-0.273833	-0.2174	-0.275741	-0.26377	-0.188406	-0.256834	-0.270341	-0.244952	-0.229347	-0.246963	-0.234699	-0.222401	-0.2247	-0.226677	-0.227846	-0.249651	-0.272288	-0.261919	-0.213232	-0.26932	-0.244689	-0.252891
1663	-0.220294	-0.205206	-0.253538	-0.21084	-0.249591	-0.203431	-0.179086	-0.211538	-0.209365	-0.202164	-0.256172	-0.277471	-0.187856	-0.164216	-0.225332	-0.13251	-0.214615	-0.233354	-0.264146	-0.184603	-0.247032	-0.268354	-0.143671	-0.228518	-0.231372	-0.215109	-0.206853	-0.274337	-0.21956	-0.279634	-0.267858	-0.183244	-0.263532	-0.273124	-0.242502	-0.214731	-0.247279	-0.241064	-0.228073	-0.215864	-0.222965	-0.223862	-0.25001	-0.256187	-0.256633	-0.215446	-0.259562	-0.248403	-0.250843
1665	-0.225921	-0.203516	-0.243904	-0.221477	-0.251755	-0.197058	-0.169365	-0.217192	-0.209496	-0.208413	-0.257361	-0.2752	-0.195256	-0.161783	-0.218885	-0.140378	-0.214391	-0.249499	-0.259901	-0.192002	-0.247179	-0.263548	-0.131866	-0.235787	-0.233433	-0.216129	-0.220195	-0.266757	-0.216939	-0.268654	-0.2684	-0.166169	-0.245865	-0.279607	-0.256594	-0.210062	-0.246882	-0.247398	-0.237377	-0.216123	-0.216103	-0.225587	-0.249518	-0.254268	-0.261835	-0.222956	-0.260853	-0.257892	-0.249576
1667	-0.229658	-0.200697	-0.237317	-0.21827	-0.250941	-0.194853	-0.166915	-0.220956	-0.213784	-0.211571	-0.260054	-0.27357	-0.194663	-0.161842	-0.216425	-0.144705	-0.216329	-0.255131	-0.257819	-0.206728	-0.248599	-0.258696	-0.129355	-0.237531	-0.232023	-0.213547	-0.224961	-0.262282	-0.216768	-0.264773	-0.268306	-0.162681	-0.236367	-0.281942	-0.251656	-0.215744	-0.245609	-0.240136	-0.232899	-0.218207	-0.221669	-0.232784	-0.247822	-0.25313	-0.260931	-0.2321	-0.263669	-0.256637	-0.249605
1669	-0.230751	-0.1963	-0.234996	-0.195682	-0.245958	-0.198485	-0.174646	-0.222074	-0.223893	-0.2104	-0.264855	-0.272837	-0.18288	-0.165391	-0.219548	-0.144077	-0.221294	-0.246046	-0.258762	-0.231713	-0.251798	-0.253781	-0.139855	-0.231539	-0.225752	-0.205921	-0.21772	-0.262153	-0.22003	-0.270831	-0.267324	-0.178215	-0.238306	-0.281616	-0.234519	-0.228061	-0.243773	-0.224158	-0.219586	-0.221462	-0.235201	-0.243487	-0.245356	-0.252492	-0.256114	-0.242292	-0.267461	-0.248495	-0.250466
1671	-0.231194	-0.20004	-0.236392	-0.184063	-0.250601	-0.197916	-0.17555	-0.2224	-0.22587	-0.211721	-0.260968	-0.27459	-0.184701	-0.172145	-0.224146	-0.141833	-0.222344	-0.255415	-0.260337	-0.23205	-0.250551	-0.252603	-0.15632	-0.228782	-0.229095	-0.197969	-0.212888	-0.267177	-0.221217	-0.275162	-0.272883	-0.176527	-0.239148	-0.274225	-0.235356	-0.231776	-0.244899	-0.211647	-0.216773	-0.23016	-0.244017	-0.243556	-0.24783	-0.254344	-0.256067	-0.236504	-0.275061	-0.246389	-0.249282
1673	-0.231332	-0.207596	-0.23953	-0.177586	-0.259754	-0.195378	-0.173254	-0.222355	-0.224036	-0.214209	-0.253009	-0.277507	-0.192899	-0.1804	-0.229436	-0.138831	-0.221561	-0.273435	-0.262208	-0.220835	-0.247219	-0.253176	-0.175581	-0.22754	-0.236943	-0.189866	-0.209185	-0.274617	-0.221432	-0.278685	-0.281509	-0.166766	-0.239474	-0.266529	-0.239564	-0.23252	-0.246469	-0.20125	-0.218064	-0.238863	-0.249306	-0.240926	-0.251251	-0.257183	-0.257038	-0.228585	-0.281082	-0.245772	-0.248326
1675	-0.245509	-0.220393	-0.249858	-0.190129	-0.258314	-0.195531	-0.165831	-0.21261	-0.222593	-0.213827	-0.252338	-0.27845	-0.195698	-0.177132	-0.229921	-0.161252	-0.222494	-0.269886	-0.264342	-0.214053	-0.248998	-0.254143	-0.176974	-0.230245	-0.240096	-0.189797	-0.213147	-0.275382	-0.223306	-0.276733	-0.283676	-0.171419	-0.241149	-0.263335	-0.24858	-0.222458	-0.248134	-0.200963	-0.235546	-0.24266	-0.236774	-0.231033	-0.256123	-0.263951	-0.260057	-0.221823	-0.27375	-0.249004	-0.250652
1677	-0.257692	-0.231589	-0.257628	-0.20185	-0.25556	-0.197378	-0.15995	-0.204073	-0.221897	-0.213195	-0.253486	-0.278936	-0.19786	-0.175297	-0.229993	-0.179824	-0.222858	-0.263075	-0.266693	-0.209442	-0.250972	-0.255712	-0.177273	-0.233523	-0.242307	-0.191721	-0.217918	-0.276257	-0.22487	-0.275131	-0.284133	-0.176429	-0.243578	-0.262248	-0.254158	-0.218534	-0.248801	-0.200174	-0.247418	-0.243074	-0.225743	-0.224721	-0.259386	-0.273142	-0.261635	-0.220246	-0.268745	-0.251097	-0.25214
1679	-0.259252	-0.235584	-0.254152	-0.206281	-0.250169	-0.205032	-0.161023	-0.202228	-0.223939	-0.212249	-0.259909	-0.278132	-0.198807	-0.181407	-0.229556	-0.178264	-0.22069	-0.248677	-0.269811	-0.212058	-0.252557	-0.25947	-0.177363	-0.238095	-0.241991	-0.199411	-0.224061	-0.279015	-0.224902	-0.276055	-0.279551	-0.179625	-0.248565	-0.264299	-0.254613	-0.223749	-0.247979	-0.198637	-0.250935	-0.238453	-0.216949	-0.223743	-0.260251	-0.285941	-0.261065	-0.22639	-0.267207	-0.251496	-0.25238
1681	-0.253673	-0.239189	-0.248269	-0.209626	-0.250485	-0.213671	-0.17003	-0.205261	-0.225967	-0.215951	-0.264176	-0.27791	-0.199975	-0.194877	-0.230108	-0.163685	-0.219321	-0.248398	-0.274836	-0.220362	-0.253449	-0.261472	-0.183186	-0.241534	-0.244281	-0.206366	-0.226359	-0.281174	-0.227896	-0.278361	-0.27542	-0.186223	-0.252961	-0.267097	-0.257893	-0.234218	-0.249403	-0.197313	-0.247704	-0.235426	-0.214106	-0.227401	-0.261453	-0.289156	-0.261428	-0.235736	-0.273612	-0.252723	-0.252583
1683	-0.240153	-0.242362	-0.239709	-0.211764	-0.25715	-0.223404	-0.187859	-0.213719	-0.227981	-0.224823	-0.266047	-0.278337	-0.201391	-0.216533	-0.231758	-0.134625	-0.218841	-0.263823	-0.281981	-0.234992	-0.25357	-0.261522	-0.195386	-0.243714	-0.249469	-0.212505	-0.224379	-0.28267	-0.234186	-0.282203	-0.27179	-0.196608	-0.256701	-0.270271	-0.262589	-0.247324	-0.251955	-0.196096	-0.241088	-0.2332	-0.214251	-0.233386	-0.262826	-0.287561	-0.262258	-0.246689	-0.284004	-0.254368	-0.252766
1685	-0.234622	-0.241999	-0.245549	-0.225811	-0.261986	-0.230632	-0.198301	-0.220349	-0.231224	-0.239758	-0.268311	-0.278943	-0.201903	-0.223131	-0.233555	-0.124928	-0.225502	-0.270618	-0.282915	-0.242181	-0.253299	-0.261859	-0.199215	-0.245188	-0.251272	-0.216635	-0.221139	-0.279477	-0.242156	-0.28362	-0.269725	-0.208538	-0.259901	-0.269864	-0.262067	-0.243711	-0.260249	-0.202749	-0.243806	-0.233718	-0.219604	-0.238183	-0.263583	-0.287847	-0.263048	-0.263984	-0.286108	-0.252953	-0.253507
1687	-0.23194	-0.240366	-0.256499	-0.244073	-0.266157	-0.23696	-0.206078	-0.226327	-0.234924	-0.256788	-0.270715	-0.279608	-0.202094	-0.224371	-0.235418	-0.122139	-0.234695	-0.274336	-0.281628	-0.246678	-0.252889	-0.2623	-0.200046	-0.24643	-0.251873	-0.220036	-0.217468	-0.274619	-0.250703	-0.284176	-0.268228	-0.220966	-0.262903	-0.269352	-0.26202	-0.237557	-0.267536	-0.210975	-0.246386	-0.233915	-0.224709	-0.242645	-0.263533	-0.288035	-0.26326	-0.279688	-0.285246	-0.252237	-0.254227
1689	-0.233487	-0.231762	-0.260558	-0.250933	-0.262166	-0.237864	-0.193479	-0.23095	-0.249129	-0.239417	-0.272704	-0.278344	-0.201295	-0.224214	-0.244241	-0.130957	-0.23948	-0.274616	-0.274217	-0.226526	-0.252326	-0.26341	-0.189105	-0.258373	-0.254154	-0.215391	-0.2241	-0.271088	-0.248297	-0.284685	-0.272761	-0.204605	-0.262367	-0.269524	-0.265583	-0.226085	-0.268843	-0.223267	-0.245472	-0.231927	-0.227151	-0.246093	-0.26032	-0.287234	-0.261087	-0.286805	-0.274664	-0.255381	-0.254679
1691	-0.239107	-0.225239	-0.264416	-0.250925	-0.260159	-0.239596	-0.184971	-0.231302	-0.260419	-0.227391	-0.27315	-0.277524	-0.201624	-0.222474	-0.254228	-0.143811	-0.243758	-0.27372	-0.269487	-0.213175	-0.25366	-0.26349	-0.177636	-0.263267	-0.255871	-0.210982	-0.232188	-0.270294	-0.244846	-0.283968	-0.279839	-0.204949	-0.262683	-0.274261	-0.266684	-0.224917	-0.268355	-0.244717	-0.251695	-0.23563	-0.232535	-0.246749	-0.259141	-0.281572	-0.264231	-0.272087	-0.268195	-0.253166	-0.255499
1693	-0.255963	-0.224459	-0.267719	-0.23197	-0.263626	-0.243608	-0.187751	-0.219869	-0.263665	-0.230112	-0.269339	-0.277931	-0.20506	-0.216364	-0.267428	-0.167798	-0.246637	-0.269581	-0.272151	-0.218589	-0.260226	-0.260732	-0.164709	-0.248712	-0.256029	-0.207223	-0.244299	-0.277051	-0.23851	-0.279873	-0.293936	-0.251385	-0.265348	-0.284398	-0.264876	-0.235934	-0.265743	-0.276997	-0.266359	-0.246064	-0.241398	-0.244103	-0.260366	-0.270164	-0.273662	-0.231548	-0.26659	-0.244614	-0.256753
1695	-0.264908	-0.227667	-0.267289	-0.227554	-0.265107	-0.241145	-0.195339	-0.215221	-0.261131	-0.231493	-0.270674	-0.278784	-0.2122	-0.205102	-0.2633	-0.190527	-0.244054	-0.268244	-0.276633	-0.229856	-0.267922	-0.266882	-0.170468	-0.239141	-0.264638	-0.207751	-0.247746	-0.282028	-0.237874	-0.2865	-0.29459	-0.251884	-0.26347	-0.28834	-0.264676	-0.241478	-0.260092	-0.295339	-0.274315	-0.25771	-0.251533	-0.249892	-0.263902	-0.275369	-0.276041	-0.218879	-0.264665	-0.24693	-0.259883
1697	-0.266842	-0.234408	-0.263553	-0.236021	-0.26483	-0.232944	-0.207185	-0.216584	-0.253477	-0.231687	-0.27657	-0.280031	-0.222622	-0.189275	-0.243818	-0.212141	-0.236633	-0.269391	-0.282724	-0.246307	-0.27662	-0.280927	-0.192782	-0.233986	-0.280733	-0.212078	-0.243516	-0.285429	-0.242288	-0.302628	-0.283332	-0.21168	-0.257566	-0.2899	-0.265094	-0.244918	-0.253273	-0.308323	-0.279691	-0.269822	-0.262157	-0.258924	-0.268326	-0.286962	-0.275709	-0.216927	-0.262618	-0.253425	-0.263735
1699	-0.255771	-0.241236	-0.258828	-0.239109	-0.257153	-0.233583	-0.20855	-0.222198	-0.242933	-0.229547	-0.27377	-0.280792	-0.226222	-0.212082	-0.242265	-0.200252	-0.234156	-0.273913	-0.284753	-0.271049	-0.277198	-0.285532	-0.210239	-0.251339	-0.26591	-0.220196	-0.234869	-0.286678	-0.248628	-0.305943	-0.280322	-0.236542	-0.259974	-0.288548	-0.260372	-0.262846	-0.258186	-0.276701	-0.266344	-0.273153	-0.248435	-0.249916	-0.269325	-0.289926	-0.277255	-0.258195	-0.269488	-0.253206	-0.259596
1701	-0.243227	-0.248019	-0.254277	-0.241351	-0.248918	-0.236217	-0.206835	-0.230047	-0.232239	-0.22793	-0.268989	-0.281882	-0.227944	-0.244358	-0.246065	-0.181107	-0.234492	-0.279018	-0.285797	-0.294855	-0.275792	-0.287405	-0.224611	-0.272208	-0.245464	-0.228914	-0.226282	-0.287177	-0.256001	-0.304993	-0.279502	-0.273819	-0.264536	-0.287436	-0.259113	-0.277434	-0.26251	-0.258263	-0.262918	-0.275763	-0.240255	-0.243589	-0.272428	-0.286659	-0.277982	-0.282554	-0.275808	-0.256171	-0.256785
1703	-0.261117	-0.253718	-0.256641	-0.252362	-0.262465	-0.234136	-0.199233	-0.256112	-0.231132	-0.244451	-0.268508	-0.290287	-0.227853	-0.268102	-0.261315	-0.184714	-0.259444	-0.279451	-0.287906	-0.269123	-0.276281	-0.284629	-0.209598	-0.255944	-0.263255	-0.231497	-0.237026	-0.284558	-0.271947	-0.288777	-0.279561	-0.239977	-0.26915	-0.287162	-0.268429	-0.281428	-0.264591	-0.281102	-0.289944	-0.276575	-0.249657	-0.246027	-0.281967	-0.265108	-0.276181	-0.254543	-0.280113	-0.268938	-0.258279
1705	-0.272327	-0.256675	-0.25957	-0.256085	-0.271481	-0.241082	-0.192678	-0.273814	-0.236648	-0.25881	-0.268384	-0.293149	-0.225707	-0.276301	-0.269553	-0.194942	-0.272724	-0.280104	-0.287464	-0.250627	-0.276153	-0.282653	-0.213441	-0.249111	-0.26789	-0.232709	-0.247916	-0.286363	-0.283112	-0.283029	-0.283498	-0.237285	-0.272293	-0.287295	-0.268655	-0.274542	-0.265418	-0.294269	-0.284626	-0.259768	-0.251057	-0.247096	-0.286904	-0.265072	-0.278295	-0.254025	-0.284799	-0.270927	-0.262961
1707	-0.269524	-0.253878	-0.263685	-0.244514	-0.270988	-0.26697	-0.188316	-0.273969	-0.25606	-0.268637	-0.269005	-0.284381	-0.219247	-0.251886	-0.263076	-0.219059	-0.261515	-0.281219	-0.281671	-0.247312	-0.274728	-0.282353	-0.25685	-0.262062	-0.244923	-0.231042	-0.259112	-0.297451	-0.284246	-0.299245	-0.295571	-0.299948	-0.272351	-0.287812	-0.260307	-0.257396	-0.265063	-0.298314	-0.248806	-0.226344	-0.244912	-0.246874	-0.287502	-0.285327	-0.284101	-0.279437	-0.289844	-0.262748	-0.270649
1709	-0.269887	-0.250861	-0.267611	-0.244176	-0.271429	-0.267932	-0.196936	-0.255288	-0.263614	-0.269034	-0.270946	-0.280404	-0.221113	-0.229365	-0.258676	-0.245695	-0.254988	-0.280459	-0.279327	-0.246063	-0.276204	-0.282678	-0.255294	-0.268251	-0.250771	-0.235589	-0.26039	-0.296957	-0.285404	-0.297229	-0.300558	-0.295524	-0.271138	-0.279031	-0.262311	-0.2502	-0.264611	-0.290103	-0.248958	-0.227353	-0.246638	-0.24736	-0.287628	-0.274895	-0.282025	-0.281058	-0.289387	-0.259899	-0.265988
1711	-0.272479	-0.247688	-0.271405	-0.251741	-0.272527	-0.251355	-0.21469	-0.223352	-0.262823	-0.262796	-0.273817	-0.279799	-0.228836	-0.208177	-0.255738	-0.274105	-0.251755	-0.278379	-0.279412	-0.246267	-0.279721	-0.283442	-0.222098	-0.269682	-0.276896	-0.24451	-0.254689	-0.288315	-0.286579	-0.282383	-0.300558	-0.243893	-0.269031	-0.268485	-0.267329	-0.247045	-0.264264	-0.279091	-0.259976	-0.238719	-0.250783	-0.249114	-0.287592	-0.258277	-0.27796	-0.276396	-0.287385	-0.259078	-0.258541
1713	-0.276597	-0.248741	-0.271695	-0.25523	-0.273901	-0.237516	-0.214367	-0.226158	-0.260059	-0.265493	-0.276409	-0.287687	-0.236358	-0.227304	-0.25546	-0.239088	-0.25423	-0.279215	-0.284358	-0.262066	-0.278922	-0.281929	-0.254501	-0.252209	-0.289766	-0.240476	-0.255623	-0.294385	-0.286245	-0.29281	-0.300558	-0.230305	-0.265114	-0.277532	-0.273969	-0.270964	-0.266869	-0.28324	-0.285425	-0.262904	-0.259041	-0.274697	-0.286926	-0.298174	-0.279485	-0.282368	-0.285762	-0.269741	-0.267226
1715	-0.280789	-0.251055	-0.271055	-0.257796	-0.274486	-0.226496	-0.212686	-0.236539	-0.253588	-0.268776	-0.27818	-0.295979	-0.242915	-0.24967	-0.256785	-0.203711	-0.256224	-0.280881	-0.289565	-0.279885	-0.277759	-0.280384	-0.288944	-0.236358	-0.298826	-0.234806	-0.257204	-0.30203	-0.286225	-0.304529	-0.300558	-0.229299	-0.261894	-0.284785	-0.281588	-0.285481	-0.268774	-0.289055	-0.2993	-0.27851	-0.263816	-0.284965	-0.284042	-0.321801	-0.281459	-0.289267	-0.285792	-0.278689	-0.273254
1717	-0.283504	-0.257365	-0.267976	-0.258749	-0.268653	-0.23341	-0.224828	-0.25842	-0.221321	-0.264573	-0.274033	-0.295979	-0.242334	-0.24281	-0.266834	-0.25063	-0.246871	-0.284995	-0.290254	-0.292289	-0.279593	-0.28164	-0.251062	-0.258299	-0.296449	-0.233959	-0.25484	-0.30203	-0.290638	-0.292263	-0.300558	-0.273776	-0.266442	-0.287991	-0.291418	-0.278772	-0.269098	-0.29863	-0.287051	-0.274753	-0.260729	-0.260659	-0.276147	-0.308703	-0.28445	-0.29826	-0.289552	-0.283768	-0.273281
1719	-0.283889	-0.264888	-0.266633	-0.258122	-0.267483	-0.238289	-0.234143	-0.271032	-0.203647	-0.263994	-0.278036	-0.292934	-0.240134	-0.234696	-0.26818	-0.281168	-0.244919	-0.286704	-0.28967	-0.294731	-0.279909	-0.282355	-0.236223	-0.278519	-0.29499	-0.234895	-0.252981	-0.297351	-0.2914	-0.284944	-0.296787	-0.300342	-0.269621	-0.290018	-0.289341	-0.266355	-0.272663	-0.298145	-0.288793	-0.275606	-0.259568	-0.25395	-0.270939	-0.302285	-0.283978	-0.286695	-0.2913	-0.285105	-0.272931
1721	-0.280465	-0.274396	-0.268128	-0.254913	-0.273933	-0.239842	-0.238839	-0.268494	-0.209828	-0.269341	-0.295362	-0.284913	-0.235287	-0.224533	-0.255297	-0.284926	-0.255065	-0.284483	-0.287006	-0.280887	-0.277743	-0.282187	-0.259055	-0.295928	-0.295033	-0.238747	-0.251948	-0.285024	-0.286194	-0.285714	-0.286852	-0.297628	-0.27056	-0.29116	-0.278322	-0.249653	-0.278662	-0.290105	-0.301042	-0.279921	-0.259854	-0.260457	-0.267747	-0.300885	-0.280904	-0.259691	-0.291535	-0.283632	-0.272298
1723	-0.275349	-0.273312	-0.268916	-0.251928	-0.272499	-0.243366	-0.250211	-0.256473	-0.208371	-0.272814	-0.295388	-0.282784	-0.235516	-0.223882	-0.251509	-0.289362	-0.25812	-0.284287	-0.285995	-0.267418	-0.277287	-0.28454	-0.269544	-0.293094	-0.298818	-0.242996	-0.253541	-0.281167	-0.2777	-0.293389	-0.283356	-0.288135	-0.270915	-0.29634	-0.28571	-0.244594	-0.274831	-0.285793	-0.303061	-0.279507	-0.257969	-0.278609	-0.265814	-0.301138	-0.280769	-0.2541	-0.290909	-0.283132	-0.272541
1725	-0.269298	-0.266366	-0.269312	-0.249066	-0.266703	-0.24798	-0.265279	-0.239203	-0.202687	-0.275249	-0.285839	-0.283917	-0.238555	-0.228495	-0.252756	-0.294175	-0.257249	-0.285212	-0.285899	-0.254156	-0.277778	-0.288288	-0.273204	-0.279056	-0.304672	-0.247465	-0.256589	-0.281998	-0.267387	-0.304885	-0.283423	-0.27489	-0.270946	-0.301067	-0.295634	-0.24202	-0.269569	-0.284099	-0.301862	-0.278311	-0.256003	-0.296744	-0.26441	-0.301556	-0.281371	-0.256182	-0.290301	-0.282793	-0.272994
1727	-0.268475	-0.263676	-0.27268	-0.255728	-0.267451	-0.252035	-0.246425	-0.251055	-0.215249	-0.266462	-0.285067	-0.282801	-0.240716	-0.233242	-0.262289	-0.283877	-0.264466	-0.297528	-0.286745	-0.26515	-0.280996	-0.290833	-0.252437	-0.25726	-0.306194	-0.259646	-0.2484	-0.292512	-0.26307	-0.305943	-0.282621	-0.25248	-0.270786	-0.294453	-0.295634	-0.241148	-0.268908	-0.299491	-0.289796	-0.278485	-0.257183	-0.293886	-0.265539	-0.300507	-0.283411	-0.289522	-0.291392	-0.282179	-0.273795
1729	-0.268942	-0.262261	-0.276994	-0.26134	-0.268127	-0.254969	-0.228418	-0.263793	-0.231013	-0.255654	-0.286788	-0.283104	-0.241171	-0.238457	-0.271005	-0.26947	-0.26986	-0.306474	-0.287506	-0.273806	-0.283664	-0.292844	-0.233172	-0.238719	-0.307092	-0.269905	-0.241887	-0.30203	-0.259967	-0.305943	-0.282039	-0.233835	-0.271229	-0.289953	-0.295634	-0.242345	-0.268746	-0.311655	-0.282179	-0.278387	-0.262227	-0.293052	-0.266596	-0.300218	-0.286886	-0.311456	-0.294814	-0.280678	-0.274261
1731	-0.273066	-0.264899	-0.284403	-0.257261	-0.265264	-0.252785	-0.231026	-0.266595	-0.253276	-0.240601	-0.296219	-0.291338	-0.233844	-0.245858	-0.271744	-0.242666	-0.262537	-0.293648	-0.2874	-0.25939	-0.282358	-0.292877	-0.233042	-0.239628	-0.307101	-0.267154	-0.248918	-0.30203	-0.259773	-0.305943	-0.282941	-0.237776	-0.274668	-0.289154	-0.295634	-0.247162	-0.269455	-0.318164	-0.282354	-0.27781	-0.274038	-0.295763	-0.267529	-0.30126	-0.292872	-0.313411	-0.302316	-0.277625	-0.274141
1733	-0.27606	-0.263403	-0.284643	-0.256078	-0.263694	-0.25104	-0.233107	-0.266801	-0.267432	-0.240555	-0.297093	-0.295979	-0.231077	-0.262047	-0.271658	-0.235426	-0.255911	-0.285459	-0.287953	-0.248521	-0.28259	-0.293105	-0.233621	-0.247514	-0.305883	-0.265481	-0.259521	-0.30203	-0.25872	-0.305943	-0.283846	-0.252658	-0.27585	-0.289215	-0.295634	-0.257386	-0.270347	-0.317853	-0.282261	-0.267667	-0.283781	-0.295514	-0.269197	-0.3019	-0.295102	-0.308584	-0.301113	-0.277375	-0.274169
1735	-0.277595	-0.256564	-0.275622	-0.258636	-0.263794	-0.249861	-0.234507	-0.263653	-0.271113	-0.259896	-0.286911	-0.295979	-0.234202	-0.28959	-0.270506	-0.253463	-0.250187	-0.283261	-0.289357	-0.242236	-0.284811	-0.293585	-0.235116	-0.264417	-0.303077	-0.2652	-0.274742	-0.30203	-0.25656	-0.305943	-0.284754	-0.281676	-0.274115	-0.289787	-0.295634	-0.270819	-0.271348	-0.313496	-0.282008	-0.251847	-0.292295	-0.29351	-0.271301	-0.302302	-0.295102	-0.299732	-0.294742	-0.278789	-0.274285
1737	-0.279038	-0.250923	-0.27924	-0.254988	-0.266345	-0.252146	-0.232536	-0.26248	-0.270798	-0.273103	-0.278553	-0.295979	-0.237083	-0.29875	-0.271394	-0.240651	-0.249219	-0.282402	-0.293172	-0.238395	-0.290456	-0.292635	-0.235128	-0.270506	-0.299287	-0.268206	-0.270656	-0.30203	-0.257133	-0.305943	-0.291294	-0.292737	-0.272632	-0.295949	-0.286103	-0.275293	-0.271051	-0.305348	-0.270747	-0.249572	-0.29517	-0.292188	-0.277847	-0.303699	-0.290259	-0.305178	-0.293317	-0.277703	-0.274838
1739	-0.28044	-0.245793	-0.288261	-0.248686	-0.269945	-0.255912	-0.229124	-0.262153	-0.268776	-0.283689	-0.270975	-0.295979	-0.23986	-0.30005	-0.273155	-0.21465	-0.250285	-0.282115	-0.29802	-0.2356	-0.297566	-0.291072	-0.234505	-0.271971	-0.295077	-0.272616	-0.258316	-0.30203	-0.258873	-0.305943	-0.300242	-0.29612	-0.271256	-0.301724	-0.27686	-0.278446	-0.270515	-0.297562	-0.259787	-0.251757	-0.293721	-0.290506	-0.28427	-0.306852	-0.28652	-0.311164	-0.292697	-0.275003	-0.275081
1741	-0.281205	-0.251639	-0.280108	-0.234314	-0.271736	-0.264051	-0.225465	-0.249909	-0.266186	-0.281622	-0.273959	-0.295979	-0.232504	-0.292852	-0.273454	-0.203234	-0.252937	-0.280383	-0.292464	-0.240298	-0.297817	-0.288341	-0.242024	-0.270116	-0.298917	-0.259851	-0.252042	-0.30203	-0.260555	-0.305943	-0.300558	-0.24968	-0.274862	-0.301724	-0.275458	-0.280334	-0.26954	-0.294238	-0.257703	-0.269197	-0.272559	-0.286425	-0.287103	-0.318858	-0.291951	-0.310671	-0.293183	-0.265207	-0.27335
1743	-0.280199	-0.25668	-0.271573	-0.222252	-0.273226	-0.268676	-0.222287	-0.2422	-0.265277	-0.27745	-0.276864	-0.295979	-0.228497	-0.286431	-0.271416	-0.196598	-0.254446	-0.27931	-0.287717	-0.249733	-0.296136	-0.286426	-0.253201	-0.270109	-0.301853	-0.247384	-0.247754	-0.30203	-0.261095	-0.305943	-0.300558	-0.211892	-0.277211	-0.29923	-0.274042	-0.281702	-0.268827	-0.294515	-0.260358	-0.278455	-0.257938	-0.284306	-0.293074	-0.320112	-0.295102	-0.299703	-0.296281	-0.26064	-0.269959
1745	-0.273308	-0.257659	-0.263868	-0.218962	-0.273925	-0.260922	-0.220758	-0.251235	-0.270104	-0.267744	-0.2782	-0.295979	-0.23702	-0.283679	-0.261681	-0.204266	-0.251904	-0.28063	-0.286983	-0.274205	-0.288789	-0.287403	-0.275699	-0.276739	-0.300756	-0.238042	-0.249411	-0.30203	-0.257795	-0.305943	-0.300558	-0.209398	-0.274715	-0.29329	-0.272607	-0.282352	-0.268477	-0.299767	-0.269556	-0.27641	-0.252353	-0.284897	-0.303381	-0.306513	-0.295102	-0.274264	-0.30299	-0.263295	-0.264275
1747	-0.269438	-0.257195	-0.261868	-0.219572	-0.272823	-0.262107	-0.223917	-0.257898	-0.274019	-0.259993	-0.276993	-0.29224	-0.237917	-0.284963	-0.256133	-0.209678	-0.248675	-0.28163	-0.286444	-0.284345	-0.28537	-0.284994	-0.272319	-0.280793	-0.296506	-0.241247	-0.253279	-0.297007	-0.256979	-0.305943	-0.300558	-0.214558	-0.272503	-0.291018	-0.27099	-0.282536	-0.268526	-0.295164	-0.265711	-0.275966	-0.265122	-0.285901	-0.299051	-0.29835	-0.289639	-0.26103	-0.300185	-0.265492	-0.266652
1749	-0.268673	-0.255247	-0.265732	-0.224191	-0.26987	-0.272482	-0.231898	-0.262122	-0.276997	-0.254252	-0.273172	-0.284658	-0.230972	-0.290394	-0.254888	-0.212772	-0.244739	-0.282301	-0.286108	-0.279751	-0.285988	-0.279105	-0.242334	-0.282197	-0.289015	-0.25735	-0.259421	-0.286821	-0.258718	-0.305943	-0.300558	-0.22759	-0.270585	-0.29044	-0.269288	-0.282505	-0.268759	-0.28601	-0.25584	-0.276262	-0.28637	-0.287095	-0.28796	-0.292698	-0.281652	-0.253435	-0.292984	-0.267477	-0.272753
1751	-0.267664	-0.250401	-0.268034	-0.242445	-0.270905	-0.279128	-0.228748	-0.243385	-0.274555	-0.243519	-0.270791	-0.288559	-0.220062	-0.259946	-0.250897	-0.192814	-0.235386	-0.27308	-0.284966	-0.259372	-0.285046	-0.271616	-0.219323	-0.282605	-0.284829	-0.251678	-0.259961	-0.283059	-0.257447	-0.295335	-0.292097	-0.208119	-0.272405	-0.29659	-0.2664	-0.285617	-0.268474	-0.28067	-0.251429	-0.257438	-0.265355	-0.264461	-0.272401	-0.292549	-0.282583	-0.257974	-0.292575	-0.263994	-0.272921
1753	-0.266695	-0.244884	-0.269729	-0.263964	-0.273128	-0.28409	-0.222096	-0.217895	-0.270389	-0.231168	-0.268915	-0.295979	-0.208017	-0.218972	-0.246159	-0.166465	-0.224792	-0.261188	-0.283553	-0.234471	-0.283598	-0.263746	-0.199308	-0.2822	-0.281933	-0.239243	-0.258403	-0.281444	-0.255234	-0.281364	-0.280982	-0.178739	-0.275296	-0.300336	-0.258547	-0.283556	-0.267763	-0.270499	-0.249182	-0.242202	-0.247348	-0.244038	-0.261048	-0.292122	-0.282988	-0.261144	-0.291993	-0.261164	-0.273003
1755	-0.27109	-0.251124	-0.266615	-0.234958	-0.271332	-0.266785	-0.218502	-0.220064	-0.266752	-0.218001	-0.269004	-0.295979	-0.202137	-0.222493	-0.247569	-0.185558	-0.236764	-0.272073	-0.281527	-0.234134	-0.281817	-0.261898	-0.214064	-0.259302	-0.289523	-0.23669	-0.243003	-0.283813	-0.254026	-0.269103	-0.272482	-0.172552	-0.272332	-0.293797	-0.232505	-0.261659	-0.265576	-0.241628	-0.253852	-0.244168	-0.24908	-0.236655	-0.266211	-0.289547	-0.279624	-0.256774	-0.289387	-0.261871	-0.273972
1757	-0.270987	-0.254171	-0.259484	-0.212289	-0.269685	-0.248204	-0.223971	-0.227301	-0.26417	-0.21244	-0.267852	-0.292754	-0.200164	-0.215255	-0.244402	-0.200933	-0.243916	-0.273894	-0.278485	-0.231718	-0.280538	-0.26014	-0.215946	-0.24201	-0.294212	-0.234486	-0.233216	-0.284675	-0.246258	-0.261889	-0.268104	-0.165681	-0.270409	-0.293488	-0.216868	-0.247855	-0.264718	-0.226183	-0.25276	-0.254244	-0.248399	-0.235879	-0.268689	-0.289175	-0.279487	-0.250807	-0.287408	-0.26373	-0.274581
1759	-0.259636	-0.249228	-0.242305	-0.205463	-0.268414	-0.22643	-0.252106	-0.247213	-0.264223	-0.225898	-0.263597	-0.281466	-0.207962	-0.18111	-0.22979	-0.207007	-0.239016	-0.253046	-0.272898	-0.224106	-0.280515	-0.258606	-0.185635	-0.238738	-0.291646	-0.233154	-0.237464	-0.28177	-0.222085	-0.267297	-0.274031	-0.157095	-0.271091	-0.300027	-0.212666	-0.242946	-0.265322	-0.225496	-0.245335	-0.273236	-0.245065	-0.242364	-0.268214	-0.291225	-0.282899	-0.243086	-0.286117	-0.266857	-0.274796
1761	-0.258114	-0.234924	-0.242409	-0.204089	-0.26816	-0.213094	-0.245368	-0.243153	-0.260412	-0.224719	-0.262292	-0.276594	-0.212874	-0.189602	-0.221224	-0.201185	-0.241227	-0.249558	-0.273714	-0.212937	-0.280244	-0.25859	-0.175815	-0.231482	-0.291518	-0.225726	-0.237771	-0.282003	-0.216302	-0.271569	-0.277522	-0.156214	-0.265114	-0.287151	-0.211052	-0.24362	-0.265868	-0.233004	-0.241433	-0.254277	-0.241071	-0.228629	-0.275143	-0.279678	-0.281548	-0.242633	-0.287847	-0.261494	-0.269529
1763	-0.264639	-0.212955	-0.256661	-0.207179	-0.268737	-0.206668	-0.210077	-0.219467	-0.253437	-0.211555	-0.263403	-0.276976	-0.215423	-0.233001	-0.217608	-0.185624	-0.24926	-0.260284	-0.279771	-0.198855	-0.279768	-0.259818	-0.18277	-0.220966	-0.293387	-0.213307	-0.234851	-0.284805	-0.225574	-0.274909	-0.279018	-0.161643	-0.253686	-0.267617	-0.210507	-0.24621	-0.266384	-0.243252	-0.238782	-0.22221	-0.236832	-0.208023	-0.28457	-0.263446	-0.278542	-0.24468	-0.29066	-0.253185	-0.262372
1765	-0.252112	-0.228285	-0.255515	-0.197117	-0.266853	-0.217563	-0.180667	-0.216175	-0.238543	-0.215657	-0.253183	-0.285925	-0.188407	-0.220659	-0.219219	-0.178057	-0.234355	-0.261929	-0.281696	-0.198444	-0.267577	-0.254765	-0.165517	-0.226786	-0.274276	-0.217192	-0.229109	-0.281088	-0.221895	-0.266959	-0.280649	-0.160105	-0.256664	-0.279737	-0.244965	-0.240326	-0.264807	-0.22507	-0.23987	-0.231535	-0.229831	-0.233814	-0.273028	-0.264158	-0.278257	-0.236711	-0.299007	-0.250933	-0.262027
1767	-0.238278	-0.250583	-0.251519	-0.18429	-0.264584	-0.230513	-0.15653	-0.218133	-0.223532	-0.223423	-0.241384	-0.29517	-0.158962	-0.198262	-0.221643	-0.172499	-0.216063	-0.261992	-0.281898	-0.20038	-0.254921	-0.248953	-0.144994	-0.235419	-0.251994	-0.225046	-0.222981	-0.276302	-0.215702	-0.257429	-0.281891	-0.156311	-0.261353	-0.290631	-0.269936	-0.233293	-0.264087	-0.213493	-0.238486	-0.237272	-0.228534	-0.251075	-0.264259	-0.268151	-0.278634	-0.228953	-0.302789	-0.249865	-0.26198
1769	-0.260345	-0.254569	-0.255374	-0.174279	-0.264412	-0.221044	-0.178694	-0.227058	-0.228455	-0.227895	-0.241483	-0.28483	-0.180482	-0.207448	-0.219568	-0.169096	-0.219624	-0.267848	-0.272927	-0.193169	-0.268327	-0.251099	-0.151102	-0.23322	-0.248829	-0.235777	-0.219905	-0.276469	-0.214768	-0.259689	-0.278191	-0.144674	-0.247417	-0.298192	-0.269091	-0.22313	-0.265695	-0.219896	-0.230374	-0.233242	-0.242758	-0.245121	-0.263035	-0.281072	-0.280813	-0.221772	-0.294148	-0.252013	-0.262745
1771	-0.271273	-0.258657	-0.258781	-0.170797	-0.264184	-0.215604	-0.198284	-0.232535	-0.230007	-0.235894	-0.248258	-0.278035	-0.194036	-0.206347	-0.220368	-0.171202	-0.22402	-0.272037	-0.267741	-0.190207	-0.277644	-0.252265	-0.162601	-0.228087	-0.244221	-0.236291	-0.221546	-0.277165	-0.215372	-0.262529	-0.276001	-0.142106	-0.240888	-0.29843	-0.271226	-0.226534	-0.266598	-0.243893	-0.230441	-0.234497	-0.240624	-0.23696	-0.26016	-0.278411	-0.280794	-0.217671	-0.289799	-0.254291	-0.261981
1773	-0.260804	-0.262943	-0.26133	-0.179853	-0.263851	-0.217905	-0.212928	-0.23139	-0.225086	-0.250664	-0.267855	-0.278045	-0.192295	-0.185487	-0.226689	-0.183891	-0.230019	-0.273025	-0.269822	-0.195404	-0.279108	-0.251548	-0.184453	-0.217319	-0.236845	-0.217184	-0.232245	-0.278875	-0.218929	-0.266485	-0.276709	-0.156955	-0.248586	-0.292249	-0.275973	-0.241833	-0.266882	-0.283316	-0.237677	-0.240386	-0.224148	-0.226865	-0.255837	-0.262089	-0.278848	-0.21627	-0.289213	-0.256684	-0.259878
1775	-0.251633	-0.261109	-0.259654	-0.184704	-0.265717	-0.226747	-0.212652	-0.227855	-0.232716	-0.256642	-0.271067	-0.277917	-0.193419	-0.193596	-0.229204	-0.192979	-0.236722	-0.271814	-0.274183	-0.196922	-0.279814	-0.254995	-0.187048	-0.217324	-0.240804	-0.205336	-0.226625	-0.280349	-0.222052	-0.265099	-0.279119	-0.163235	-0.251899	-0.289517	-0.274879	-0.241466	-0.268609	-0.274578	-0.242392	-0.230435	-0.220865	-0.227116	-0.251078	-0.26158	-0.278892	-0.220446	-0.287326	-0.257497	-0.260977
1777	-0.243304	-0.255306	-0.255238	-0.186829	-0.269009	-0.239833	-0.202701	-0.22277	-0.248486	-0.256919	-0.263653	-0.2777	-0.196401	-0.220491	-0.229249	-0.199731	-0.243882	-0.269177	-0.280023	-0.196055	-0.280029	-0.261141	-0.177154	-0.224315	-0.252113	-0.198198	-0.210421	-0.28167	-0.224893	-0.260249	-0.282632	-0.163956	-0.25237	-0.287821	-0.272516	-0.237933	-0.270521	-0.254958	-0.246487	-0.218398	-0.221751	-0.231042	-0.247057	-0.265861	-0.279482	-0.226368	-0.285333	-0.257769	-0.262727
1779	-0.255792	-0.249376	-0.257751	-0.203736	-0.271345	-0.234973	-0.202372	-0.223796	-0.240661	-0.2419	-0.259198	-0.278081	-0.201833	-0.233833	-0.232065	-0.195925	-0.237507	-0.268339	-0.282251	-0.200369	-0.280394	-0.257926	-0.19021	-0.229772	-0.253927	-0.214702	-0.218265	-0.280792	-0.234444	-0.267212	-0.291851	-0.180065	-0.258799	-0.288553	-0.273519	-0.247085	-0.269645	-0.25671	-0.25092	-0.236334	-0.235082	-0.250963	-0.256114	-0.281836	-0.280675	-0.237295	-0.286803	-0.255915	-0.261926
1781	-0.267774	-0.244389	-0.260732	-0.221312	-0.272646	-0.227448	-0.2046	-0.225968	-0.232487	-0.227447	-0.25708	-0.278739	-0.207579	-0.243102	-0.235319	-0.192117	-0.230854	-0.268059	-0.284032	-0.205503	-0.280344	-0.254593	-0.207325	-0.234816	-0.252422	-0.230467	-0.230639	-0.28035	-0.243324	-0.275292	-0.29933	-0.195472	-0.265486	-0.288242	-0.2751	-0.252931	-0.269159	-0.259351	-0.25408	-0.253849	-0.245915	-0.27107	-0.262902	-0.291963	-0.284032	-0.243849	-0.288175	-0.255403	-0.261238
1783	-0.256716	-0.245559	-0.260124	-0.229117	-0.268216	-0.219917	-0.214071	-0.229672	-0.244517	-0.231168	-0.267123	-0.280615	-0.213018	-0.239156	-0.238752	-0.19833	-0.235285	-0.269634	-0.28638	-0.21096	-0.277485	-0.259399	-0.228619	-0.23867	-0.238678	-0.219015	-0.249174	-0.284796	-0.241522	-0.279285	-0.290231	-0.191746	-0.268158	-0.285769	-0.277879	-0.251914	-0.269484	-0.263835	-0.254603	-0.270491	-0.251566	-0.29156	-0.264984	-0.289954	-0.291879	-0.241331	-0.289345	-0.257677	-0.260784
1785	-0.250717	-0.24836	-0.260186	-0.239744	-0.265063	-0.221818	-0.22051	-0.237339	-0.250659	-0.234598	-0.272556	-0.285016	-0.225421	-0.237006	-0.241537	-0.202777	-0.240688	-0.272872	-0.286902	-0.213155	-0.276149	-0.264699	-0.240648	-0.247212	-0.237272	-0.215057	-0.258433	-0.290816	-0.239017	-0.287263	-0.288396	-0.199024	-0.270719	-0.286362	-0.278035	-0.259109	-0.269576	-0.273235	-0.25388	-0.271162	-0.261518	-0.303386	-0.264228	-0.292762	-0.295102	-0.261531	-0.290222	-0.261528	-0.261389
1787	-0.252334	-0.253617	-0.261254	-0.254619	-0.263832	-0.237918	-0.222385	-0.250971	-0.247941	-0.237591	-0.27105	-0.293218	-0.248308	-0.23756	-0.243347	-0.204566	-0.247551	-0.278613	-0.284677	-0.21044	-0.277107	-0.270743	-0.238733	-0.262809	-0.254436	-0.22238	-0.25373	-0.299206	-0.235452	-0.301239	-0.297495	-0.222862	-0.273113	-0.289094	-0.276361	-0.272026	-0.269508	-0.286063	-0.252289	-0.260702	-0.274468	-0.309173	-0.261494	-0.298927	-0.295102	-0.297563	-0.290894	-0.266479	-0.262731
1789	-0.253028	-0.254005	-0.262936	-0.255359	-0.262909	-0.248103	-0.218122	-0.260715	-0.255573	-0.241898	-0.269526	-0.295979	-0.264545	-0.237806	-0.245437	-0.201916	-0.250456	-0.282354	-0.284449	-0.216861	-0.278862	-0.272948	-0.226694	-0.272708	-0.273548	-0.230217	-0.255335	-0.30203	-0.241946	-0.305943	-0.300558	-0.231658	-0.273204	-0.289597	-0.285712	-0.275517	-0.269051	-0.275973	-0.253417	-0.249523	-0.277597	-0.307795	-0.263795	-0.300606	-0.289462	-0.302086	-0.291853	-0.282232	-0.267547
1791	-0.253252	-0.251922	-0.264927	-0.248926	-0.262141	-0.255287	-0.210745	-0.268487	-0.268459	-0.246871	-0.267992	-0.295979	-0.277407	-0.237895	-0.247669	-0.197013	-0.251352	-0.285081	-0.285233	-0.227918	-0.281022	-0.273203	-0.209518	-0.279715	-0.293649	-0.238315	-0.260141	-0.30203	-0.253544	-0.305943	-0.300558	-0.23282	-0.272128	-0.28958	-0.295634	-0.276815	-0.268644	-0.265897	-0.255848	-0.240974	-0.27768	-0.30536	-0.266933	-0.301314	-0.283645	-0.297993	-0.292617	-0.296967	-0.272523
1793	-0.253217	-0.252394	-0.268079	-0.256914	-0.266829	-0.265514	-0.211638	-0.267067	-0.269792	-0.249953	-0.271313	-0.295979	-0.264278	-0.236907	-0.251835	-0.204763	-0.249637	-0.285434	-0.287475	-0.244349	-0.283187	-0.271383	-0.213127	-0.273895	-0.299219	-0.24336	-0.253154	-0.30203	-0.259984	-0.291657	-0.300558	-0.236366	-0.275462	-0.288532	-0.295634	-0.273803	-0.269106	-0.28548	-0.264544	-0.25309	-0.267551	-0.304223	-0.269857	-0.300515	-0.283769	-0.269848	-0.291545	-0.290127	-0.274216
1795	-0.256391	-0.254127	-0.271097	-0.265857	-0.271462	-0.274101	-0.214126	-0.261943	-0.270567	-0.254053	-0.274563	-0.295979	-0.252357	-0.236101	-0.257232	-0.218206	-0.24863	-0.285761	-0.290351	-0.257415	-0.284812	-0.271716	-0.220841	-0.268634	-0.302474	-0.249775	-0.246341	-0.30203	-0.264114	-0.279112	-0.300558	-0.245413	-0.279763	-0.287803	-0.29144	-0.273483	-0.269837	-0.300809	-0.272076	-0.262346	-0.260519	-0.303915	-0.271342	-0.301114	-0.28632	-0.255185	-0.290773	-0.285151	-0.275554
1797	-0.273174	-0.260331	-0.27317	-0.274076	-0.274067	-0.274772	-0.220621	-0.244233	-0.272789	-0.263067	-0.275912	-0.295979	-0.254088	-0.236419	-0.267183	-0.251476	-0.251464	-0.286758	-0.295429	-0.254528	-0.284167	-0.28181	-0.239017	-0.269953	-0.300754	-0.262971	-0.244147	-0.30203	-0.260201	-0.278614	-0.300558	-0.276859	-0.286685	-0.287592	-0.280451	-0.277522	-0.271002	-0.309249	-0.277721	-0.266967	-0.258505	-0.30495	-0.270497	-0.303975	-0.292805	-0.262367	-0.290485	-0.283196	-0.276317
1799	-0.287647	-0.268235	-0.274537	-0.276512	-0.274901	-0.275098	-0.2263	-0.239703	-0.274784	-0.271198	-0.27726	-0.295979	-0.259573	-0.2365	-0.273913	-0.272744	-0.254064	-0.287492	-0.298191	-0.249076	-0.282918	-0.288856	-0.246385	-0.274442	-0.298737	-0.265506	-0.25286	-0.30203	-0.257708	-0.27814	-0.300558	-0.298591	-0.286293	-0.288289	-0.276812	-0.278281	-0.274479	-0.308086	-0.280909	-0.270677	-0.2584	-0.300488	-0.272849	-0.312739	-0.295102	-0.279385	-0.290595	-0.284068	-0.276017
1801	-0.299361	-0.278167	-0.27506	-0.272048	-0.273621	-0.275011	-0.231008	-0.250901	-0.276506	-0.278275	-0.278608	-0.295979	-0.269538	-0.236297	-0.2768	-0.27969	-0.256383	-0.287912	-0.298191	-0.240564	-0.280949	-0.292266	-0.240856	-0.282714	-0.296365	-0.25532	-0.274589	-0.30203	-0.256909	-0.277695	-0.300558	-0.308732	-0.277172	-0.289485	-0.277205	-0.277239	-0.279223	-0.301654	-0.282747	-0.273888	-0.259342	-0.29301	-0.276954	-0.324741	-0.295102	-0.301799	-0.290924	-0.286492	-0.275135
1803	-0.292913	-0.281521	-0.273593	-0.284957	-0.273899	-0.275165	-0.236144	-0.258145	-0.27797	-0.2807	-0.288341	-0.295979	-0.275718	-0.244463	-0.279471	-0.274851	-0.253286	-0.288535	-0.298191	-0.244439	-0.28175	-0.289464	-0.239495	-0.28497	-0.299348	-0.249781	-0.281562	-0.30203	-0.2614	-0.276877	-0.300558	-0.313876	-0.273548	-0.295951	-0.286882	-0.261526	-0.27965	-0.296254	-0.279679	-0.285817	-0.268135	-0.292124	-0.286245	-0.325822	-0.295102	-0.303011	-0.298374	-0.292508	-0.274858
1805	-0.279407	-0.282319	-0.271353	-0.304617	-0.274783	-0.275412	-0.241446	-0.263853	-0.279335	-0.281317	-0.301331	-0.295979	-0.280426	-0.255881	-0.282058	-0.26543	-0.248083	-0.289237	-0.298191	-0.253128	-0.283627	-0.284248	-0.239753	-0.284888	-0.30441	-0.246049	-0.282801	-0.30203	-0.267947	-0.275916	-0.300558	-0.317078	-0.27206	-0.301724	-0.295634	-0.250781	-0.27965	-0.293491	-0.277151	-0.296383	-0.276336	-0.292724	-0.294434	-0.325822	-0.295102	-0.301967	-0.30511	-0.296588	-0.274592
1807	-0.279174	-0.281473	-0.271355	-0.301631	-0.283736	-0.2653	-0.257275	-0.265981	-0.276908	-0.275986	-0.301535	-0.295979	-0.277247	-0.276894	-0.284675	-0.271324	-0.252963	-0.300268	-0.298191	-0.272084	-0.291687	-0.288285	-0.274415	-0.282688	-0.30159	-0.251497	-0.26731	-0.30203	-0.279859	-0.292937	-0.300558	-0.301104	-0.270639	-0.301724	-0.295634	-0.270521	-0.27965	-0.302766	-0.279492	-0.296383	-0.278039	-0.297275	-0.294947	-0.325822	-0.295102	-0.300188	-0.30511	-0.289791	-0.274092
1809	-0.28252	-0.281032	-0.273844	-0.295675	-0.290561	-0.26121	-0.268673	-0.269027	-0.274939	-0.272533	-0.301535	-0.295979	-0.275756	-0.292234	-0.286634	-0.274593	-0.260087	-0.308681	-0.296723	-0.282924	-0.296281	-0.293156	-0.301187	-0.281316	-0.299483	-0.25608	-0.255383	-0.300046	-0.288549	-0.305943	-0.300558	-0.291798	-0.269924	-0.301724	-0.295634	-0.28356	-0.277551	-0.307185	-0.280505	-0.296383	-0.274931	-0.299229	-0.290623	-0.325822	-0.295102	-0.301022	-0.30511	-0.285484	-0.274288
1811	-0.296047	-0.28189	-0.283751	-0.281829	-0.290561	-0.275826	-0.266162	-0.275024	-0.274538	-0.275042	-0.301535	-0.295979	-0.279751	-0.289957	-0.286601	-0.269183	-0.273516	-0.308681	-0.290819	-0.268727	-0.290099	-0.300105	-0.302441	-0.282552	-0.29991	-0.257608	-0.255041	-0.292062	-0.287241	-0.305943	-0.300558	-0.303578	-0.271341	-0.301724	-0.295634	-0.288006	-0.272758	-0.305375	-0.279816	-0.296383	-0.265655	-0.297854	-0.280098	-0.325822	-0.295102	-0.305205	-0.30511	-0.284374	-0.275377
1813	-0.297209	-0.283861	-0.288579	-0.288084	-0.286521	-0.282844	-0.265415	-0.275752	-0.274207	-0.275277	-0.301535	-0.295979	-0.281534	-0.293961	-0.285987	-0.264272	-0.276864	-0.308681	-0.287823	-0.262929	-0.290256	-0.303491	-0.295955	-0.283306	-0.299667	-0.262859	-0.265284	-0.292265	-0.289228	-0.305943	-0.300558	-0.309311	-0.273679	-0.301724	-0.295634	-0.297221	-0.274697	-0.302138	-0.283283	-0.290897	-0.268608	-0.294499	-0.283024	-0.325822	-0.295102	-0.301414	-0.30511	-0.28319	-0.276132
1815	-0.286619	-0.286888	-0.288579	-0.313444	-0.27864	-0.28264	-0.266345	-0.271472	-0.273943	-0.273351	-0.301535	-0.295979	-0.281217	-0.303933	-0.28482	-0.259836	-0.270631	-0.308681	-0.287593	-0.265114	-0.296438	-0.303491	-0.282114	-0.283601	-0.298785	-0.271649	-0.285587	-0.300249	-0.294346	-0.305943	-0.300558	-0.309296	-0.27689	-0.301724	-0.295634	-0.308459	-0.279489	-0.298296	-0.288513	-0.283085	-0.276747	-0.290304	-0.291653	-0.325822	-0.295102	-0.294241	-0.30511	-0.281976	-0.276745
1817	-0.292484	-0.285728	-0.288579	-0.300301	-0.283004	-0.278529	-0.272168	-0.275653	-0.274096	-0.287989	-0.301535	-0.295979	-0.285854	-0.299372	-0.281857	-0.271802	-0.274243	-0.30005	-0.292308	-0.263817	-0.297817	-0.299705	-0.28834	-0.283893	-0.287888	-0.273333	-0.277441	-0.30203	-0.295761	-0.305943	-0.300558	-0.312097	-0.283356	-0.301724	-0.295634	-0.308838	-0.27965	-0.325419	-0.284456	-0.290371	-0.279199	-0.301471	-0.300123	-0.325822	-0.295102	-0.297759	-0.30511	-0.281292	-0.276755
1819	-0.302639	-0.282908	-0.288215	-0.27685	-0.290561	-0.273745	-0.279563	-0.281639	-0.274306	-0.306587	-0.301535	-0.295979	-0.291712	-0.291126	-0.279124	-0.288987	-0.280424	-0.289854	-0.298191	-0.262352	-0.297817	-0.294918	-0.29866	-0.284598	-0.275889	-0.272969	-0.263094	-0.30203	-0.296068	-0.305305	-0.300558	-0.315654	-0.290451	-0.301724	-0.295634	-0.306477	-0.27965	-0.347122	-0.281952	-0.293553	-0.282158	-0.310137	-0.304695	-0.325822	-0.295102	-0.300871	-0.30511	-0.283035	-0.276796
1821	-0.302639	-0.269405	-0.279341	-0.270884	-0.290561	-0.279444	-0.290868	-0.273025	-0.273035	-0.306587	-0.301535	-0.295979	-0.292831	-0.294253	-0.293803	-0.318067	-0.280547	-0.300963	-0.298191	-0.280292	-0.297817	-0.292151	-0.270037	-0.294943	-0.305331	-0.272424	-0.2947	-0.30203	-0.295321	-0.289755	-0.300558	-0.318025	-0.290451	-0.301724	-0.295634	-0.296233	-0.27965	-0.347122	-0.285712	-0.281269	-0.287476	-0.308662	-0.296268	-0.325822	-0.295102	-0.301383	-0.30511	-0.292824	-0.27701
1823	-0.302639	-0.263703	-0.273335	-0.26727	-0.287368	-0.283676	-0.296405	-0.26869	-0.276315	-0.306587	-0.301535	-0.295979	-0.297725	-0.299128	-0.304002	-0.332065	-0.279989	-0.308681	-0.298191	-0.290991	-0.297817	-0.292561	-0.257134	-0.30213	-0.320636	-0.277291	-0.316659	-0.30203	-0.299226	-0.283699	-0.300558	-0.317013	-0.290451	-0.301724	-0.295634	-0.296121	-0.27965	-0.339332	-0.286931	-0.275075	-0.297754	-0.309851	-0.292183	-0.325822	-0.295102	-0.305587	-0.30511	-0.297771	-0.277317
1825	-0.302639	-0.275756	-0.273852	-0.269013	-0.276909	-0.284571	-0.288814	-0.274092	-0.289953	-0.306587	-0.301535	-0.295979	-0.311209	-0.307979	-0.304002	-0.31174	-0.277878	-0.308681	-0.298191	-0.28521	-0.297817	-0.300201	-0.280006	-0.30213	-0.303769	-0.294472	-0.316659	-0.30203	-0.313721	-0.299249	-0.300558	-0.308302	-0.290451	-0.301724	-0.295634	-0.306366	-0.27965	-0.323581	-0.285556	-0.275105	-0.313102	-0.31376	-0.292537	-0.325822	-0.295102	-0.313562	-0.30511	-0.297771	-0.27772
1827	-0.302639	-0.288496	-0.278833	-0.295737	-0.278362	-0.28315	-0.288682	-0.277564	-0.295825	-0.298496	-0.301535	-0.295979	-0.309142	-0.308439	-0.304002	-0.298048	-0.277052	-0.308681	-0.295108	-0.286484	-0.294457	-0.29919	-0.307128	-0.30213	-0.299185	-0.296393	-0.305193	-0.30203	-0.319961	-0.305943	-0.300558	-0.304681	-0.290451	-0.301724	-0.295634	-0.308838	-0.27965	-0.33173	-0.29302	-0.274001	-0.288972	-0.32451	-0.298748	-0.325822	-0.295102	-0.329149	-0.30511	-0.297771	-0.280701
1829	-0.302639	-0.301757	-0.287189	-0.341347	-0.288821	-0.279976	-0.294187	-0.279577	-0.295825	-0.284288	-0.301535	-0.295979	-0.295318	-0.302554	-0.304002	-0.289369	-0.277199	-0.308681	-0.289695	-0.293092	-0.288556	-0.291637	-0.337464	-0.30213	-0.303889	-0.286776	-0.28506	-0.30203	-0.319961	-0.305943	-0.300558	-0.304909	-0.290451	-0.301724	-0.295634	-0.308838	-0.27965	-0.346721	-0.303061	-0.272882	-0.253208	-0.336714	-0.306448	-0.325822	-0.295102	-0.346747	-0.30511	-0.297771	-0.284416
1831	-0.29423	-0.296339	-0.288579	-0.333964	-0.290561	-0.294927	-0.296893	-0.273784	-0.295825	-0.282103	-0.301535	-0.295979	-0.290007	-0.294669	-0.304002	-0.295386	-0.288465	-0.308681	-0.293307	-0.273836	-0.28603	-0.290433	-0.290464	-0.30213	-0.302933	-0.283811	-0.286718	-0.295271	-0.319961	-0.305943	-0.300558	-0.308343	-0.28126	-0.301724	-0.295634	-0.308838	-0.27965	-0.329154	-0.303061	-0.286601	-0.257025	-0.318019	-0.298148	-0.325822	-0.295102	-0.346747	-0.30511	-0.297771	-0.284416
1833	-0.286117	-0.288146	-0.288579	-0.317353	-0.290561	-0.31064	-0.2986	-0.267905	-0.295825	-0.282196	-0.301535	-0.295979	-0.288453	-0.290196	-0.304002	-0.305423	-0.299013	-0.308681	-0.298191	-0.254155	-0.285118	-0.291222	-0.23454	-0.300924	-0.302446	-0.283435	-0.291885	-0.288749	-0.318587	-0.305943	-0.300558	-0.312628	-0.272392	-0.301724	-0.295634	-0.303471	-0.27965	-0.312722	-0.303061	-0.296383	-0.265101	-0.310052	-0.294611	-0.325822	-0.295102	-0.342145	-0.30511	-0.294843	-0.283299
1835	-0.296204	-0.288733	-0.288579	-0.313163	-0.290561	-0.300035	-0.296249	-0.275581	-0.295825	-0.281176	-0.301535	-0.295979	-0.30589	-0.320858	-0.304002	-0.325476	-0.282483	-0.308681	-0.298191	-0.27814	-0.292871	-0.298712	-0.238626	-0.28859	-0.316695	-0.294689	-0.289307	-0.296857	-0.304549	-0.305943	-0.300558	-0.318861	-0.283417	-0.301724	-0.295634	-0.284767	-0.27965	-0.299108	-0.303061	-0.296383	-0.283761	-0.328747	-0.302911	-0.325822	-0.295102	-0.326108	-0.30511	-0.284636	-0.279403
1837	-0.302639	-0.289538	-0.288579	-0.311217	-0.290561	-0.292196	-0.30105	-0.27934	-0.295825	-0.285961	-0.301535	-0.295979	-0.311464	-0.34042	-0.304002	-0.338269	-0.273438	-0.308681	-0.298191	-0.293928	-0.297817	-0.301309	-0.255431	-0.28165	-0.325785	-0.295656	-0.287164	-0.297784	-0.300676	-0.305943	-0.300558	-0.330961	-0.290451	-0.301724	-0.295634	-0.278724	-0.27965	-0.310178	-0.297901	-0.296383	-0.292547	-0.33714	-0.306637	-0.325822	-0.295102	-0.327745	-0.30511	-0.281826	-0.279801
1839	-0.302639	-0.290725	-0.288579	-0.313225	-0.290561	-0.289232	-0.318455	-0.276197	-0.295825	-0.300975	-0.301535	-0.295979	-0.296133	-0.34042	-0.304002	-0.338269	-0.277583	-0.308681	-0.298191	-0.295271	-0.297817	-0.295282	-0.294647	-0.284216	-0.325785	-0.278494	-0.285788	-0.286055	-0.314714	-0.305943	-0.300558	-0.353399	-0.290451	-0.301724	-0.295634	-0.282996	-0.27965	-0.341358	-0.288539	-0.296383	-0.293286	-0.33714	-0.306637	-0.325822	-0.295102	-0.343782	-0.30511	-0.285043	-0.283696
1841	-0.302639	-0.295784	-0.288579	-0.311534	-0.290561	-0.289729	-0.310922	-0.285661	-0.295825	-0.306587	-0.301535	-0.295979	-0.287384	-0.32972	-0.304002	-0.338269	-0.277305	-0.308681	-0.298191	-0.297145	-0.297817	-0.296803	-0.306586	-0.279524	-0.325785	-0.282827	-0.28776	-0.289016	-0.311139	-0.305943	-0.300558	-0.348332	-0.290451	-0.301724	-0.295634	-0.29555	-0.27965	-0.333048	-0.284947	-0.28875	-0.294728	-0.324748	-0.306637	-0.325822	-0.295102	-0.346747	-0.30511	-0.285884	-0.284416
1843	-0.302639	-0.303155	-0.288579	-0.307635	-0.290561	-0.292293	-0.288504	-0.30265	-0.295825	-0.306587	-0.301535	-0.295979	-0.282565	-0.312633	-0.304002	-0.338269	-0.274387	-0.308681	-0.298191	-0.299335	-0.297817	-0.302831	-0.302243	-0.270502	-0.325785	-0.299989	-0.29173	-0.300745	-0.297051	-0.305943	-0.300558	-0.326847	-0.290451	-0.301724	-0.295634	-0.307903	-0.27965	-0.316879	-0.283768	-0.280869	-0.296074	-0.311955	-0.306637	-0.325822	-0.295102	-0.346747	-0.30511	-0.286692	-0.284416
1845	-0.302639	-0.303963	-0.288579	-0.308463	-0.290561	-0.293095	-0.291437	-0.304512	-0.295825	-0.306587	-0.301535	-0.295979	-0.283768	-0.30623	-0.304002	-0.338269	-0.279064	-0.308681	-0.298191	-0.298973	-0.297817	-0.303491	-0.294542	-0.286245	-0.325785	-0.291195	-0.295026	-0.30203	-0.308051	-0.305943	-0.300558	-0.324705	-0.284457	-0.301724	-0.295634	-0.296112	-0.27965	-0.313436	-0.295414	-0.290234	-0.294439	-0.327158	-0.306637	-0.325822	-0.295102	-0.346747	-0.30511	-0.29338	-0.284416
1847	-0.302639	-0.303963	-0.288579	-0.30995	-0.289452	-0.293528	-0.296524	-0.302463	-0.294141	-0.306587	-0.301535	-0.295979	-0.285908	-0.301193	-0.304002	-0.338269	-0.283918	-0.308681	-0.298191	-0.298226	-0.297817	-0.303491	-0.288989	-0.30213	-0.325785	-0.280571	-0.297365	-0.30203	-0.319961	-0.305943	-0.300558	-0.324818	-0.279807	-0.301724	-0.295634	-0.292419	-0.27965	-0.318286	-0.299655	-0.296383	-0.293174	-0.33714	-0.306637	-0.325822	-0.295102	-0.340579	-0.30511	-0.297771	-0.284416
1849	-0.302639	-0.303963	-0.288579	-0.311859	-0.282281	-0.293128	-0.29633	-0.289209	-0.283252	-0.306587	-0.301535	-0.295979	-0.289119	-0.296438	-0.304002	-0.338269	-0.284622	-0.308681	-0.298191	-0.297087	-0.297817	-0.303491	-0.297445	-0.30213	-0.325785	-0.277403	-0.294924	-0.30203	-0.319961	-0.305943	-0.300558	-0.324242	-0.286539	-0.301724	-0.295634	-0.30421	-0.27965	-0.338994	-0.289737	-0.296383	-0.292617	-0.33714	-0.306637	-0.325822	-0.295102	-0.322617	-0.30511	-0.297771	-0.284416
1851	-0.302639	-0.303963	-0.288579	-0.315674	-0.281116	-0.297428	-0.293158	-0.287057	-0.281484	-0.302346	-0.301535	-0.295979	-0.297266	-0.297664	-0.304002	-0.338269	-0.288795	-0.308681	-0.298191	-0.303229	-0.297817	-0.301424	-0.303924	-0.30213	-0.325785	-0.281908	-0.29352	-0.30203	-0.319961	-0.305943	-0.300558	-0.333047	-0.290451	-0.301724	-0.295634	-0.301752	-0.27965	-0.347122	-0.28691	-0.290505	-0.30094	-0.33714	-0.306637	-0.325822	-0.295102	-0.326479	-0.30511	-0.297771	-0.284416
1853	-0.302639	-0.303963	-0.288579	-0.322134	-0.288287	-0.308248	-0.285853	-0.30031	-0.292373	-0.292221	-0.301535	-0.295979	-0.312261	-0.307192	-0.304002	-0.338269	-0.297782	-0.308681	-0.298191	-0.319477	-0.297817	-0.296489	-0.307661	-0.30213	-0.325785	-0.297065	-0.293552	-0.30203	-0.319961	-0.305943	-0.300558	-0.354868	-0.290451	-0.301724	-0.295634	-0.290088	-0.27965	-0.347122	-0.288665	-0.280829	-0.315001	-0.33714	-0.306637	-0.325822	-0.295102	-0.344441	-0.30511	-0.297771	-0.284416
1855	-0.302639	-0.303963	-0.288579	-0.322463	-0.290561	-0.311678	-0.286328	-0.304512	-0.295825	-0.295927	-0.301535	-0.295979	-0.317014	-0.322098	-0.304002	-0.338269	-0.300631	-0.308681	-0.298191	-0.324627	-0.297817	-0.298295	-0.309023	-0.30213	-0.325785	-0.301869	-0.294329	-0.30203	-0.319961	-0.305943	-0.300558	-0.34875	-0.290451	-0.301724	-0.295634	-0.298757	-0.27965	-0.347122	-0.296005	-0.280075	-0.316806	-0.33714	-0.306637	-0.325822	-0.295102	-0.346747	-0.30511	-0.297771	-0.284416
1857	-0.302639	-0.303963	-0.288579	-0.319946	-0.290561	-0.311678	-0.290413	-0.304512	-0.295825	-0.306052	-0.301535	-0.295979	-0.317014	-0.339501	-0.304002	-0.338269	-0.300631	-0.308681	-0.298191	-0.324627	-0.297817	-0.30323	-0.309283	-0.30213	-0.325785	-0.301869	-0.29545	-0.30203	-0.319961	-0.305943	-0.300558	-0.329663	-0.290451	-0.301724	-0.295634	-0.307346	-0.27965	-0.347122	-0.303061	-0.281796	-0.316806	-0.33714	-0.306637	-0.325822	-0.295102	-0.346747	-0.30511	-0.297771	-0.284416
1859	-0.302639	-0.303963	-0.288579	-0.322594	-0.290561	-0.311678	-0.309363	-0.304512	-0.295825	-0.306587	-0.301535	-0.295979	-0.317014	-0.34042	-0.304002	-0.338269	-0.300631	-0.308681	-0.298191	-0.324627	-0.297817	-0.298789	-0.327421	-0.30213	-0.325785	-0.301869	-0.296441	-0.30203	-0.319961	-0.305943	-0.300558	-0.328379	-0.290451	-0.301724	-0.295634	-0.296355	-0.27965	-0.347122	-0.303061	-0.290912	-0.316806	-0.33714	-0.306637	-0.325822	-0.295102	-0.346747	-0.30511	-0.297771	-0.284416
1861	-0.302639	-0.303963	-0.288579	-0.327834	-0.290561	-0.311678	-0.324961	-0.304512	-0.295825	-0.306587	-0.301535	-0.295979	-0.317014	-0.34042	-0.304002	-0.338269	-0.300631	-0.308681	-0.298191	-0.324627	-0.297817	-0.294853	-0.342511	-0.30213	-0.325785	-0.301869	-0.299585	-0.30203	-0.319961	-0.305943	-0.300558	-0.332246	-0.290451	-0.301724	-0.295634	-0.288344	-0.27965	-0.347122	-0.303061	-0.296383	-0.316806	-0.33714	-0.306637	-0.325822	-0.295102	-0.340422	-0.30511	-0.297771	-0.284416
1863	-0.302639	-0.303963	-0.288579	-0.341676	-0.290561	-0.311678	-0.324961	-0.304512	-0.295825	-0.306587	-0.301535	-0.295979	-0.317014	-0.34042	-0.304002	-0.338269	-0.300631	-0.308681	-0.298191	-0.324627	-0.297817	-0.294748	-0.342511	-0.30213	-0.325785	-0.301869	-0.310785	-0.30203	-0.319961	-0.305943	-0.300558	-0.351624	-0.290451	-0.301724	-0.295634	-0.284806	-0.27965	-0.347122	-0.303061	-0.296383	-0.316806	-0.33714	-0.306637	-0.325822	-0.295102	-0.324603	-0.30511	-0.297771	-0.284416
1865	-0.302639	-0.303963	-0.288579	-0.348934	-0.290561	-0.307124	-0.324961	-0.304512	-0.295825	-0.306587	-0.301535	-0.295979	-0.317014	-0.34042	-0.304002	-0.338269	-0.300631	-0.308681	-0.298191	-0.318959	-0.297817	-0.297103	-0.342511	-0.30213	-0.325785	-0.301869	-0.316659	-0.30203	-0.319961	-0.305943	-0.300558	-0.361786	-0.290451	-0.301724	-0.295634	-0.286664	-0.27965	-0.347122	-0.303061	-0.296383	-0.310356	-0.33714	-0.306637	-0.325822	-0.295102	-0.32979	-0.30511	-0.297771	-0.284416
1867	-0.302639	-0.303963	-0.288579	-0.348934	-0.290561	-0.297549	-0.324961	-0.304512	-0.295825	-0.306587	-0.301535	-0.295979	-0.317014	-0.34042	-0.304002	-0.338269	-0.300631	-0.308681	-0.298191	-0.307039	-0.297817	-0.302172	-0.342511	-0.30213	-0.325785	-0.301869	-0.316659	-0.30203	-0.319961	-0.305943	-0.300558	-0.361786	-0.290451	-0.301724	-0.295634	-0.291251	-0.27965	-0.347122	-0.303061	-0.296383	-0.300643	-0.33714	-0.306637	-0.325822	-0.295102	-0.345609	-0.30511	-0.297771	-0.284416
1869	-0.302639	-0.303963	-0.288579	-0.338875	-0.290561	-0.302141	-0.324961	-0.296439	-0.295825	-0.306587	-0.301535	-0.295979	-0.317014	-0.34042	-0.304002	-0.338269	-0.300631	-0.308681	-0.298191	-0.299561	-0.297817	-0.303491	-0.342511	-0.30213	-0.325785	-0.301869	-0.316659	-0.30203	-0.319961	-0.305943	-0.300558	-0.361786	-0.290451	-0.301724	-0.295634	-0.300807	-0.27965	-0.347122	-0.303061	-0.296383	-0.295893	-0.33714	-0.306637	-0.325822	-0.295102	-0.346747	-0.30511	-0.297771	-0.284416
1871	-0.302639	-0.303933	-0.288579	-0.325385	-0.290561	-0.311678	-0.324961	-0.285556	-0.295825	-0.306587	-0.301535	-0.295979	-0.317014	-0.34042	-0.304002	-0.338269	-0.300631	-0.308681	-0.298191	-0.293682	-0.297817	-0.303468	-0.342511	-0.30213	-0.325785	-0.301869	-0.316659	-0.30203	-0.319961	-0.305943	-0.300503	-0.3617	-0.290451	-0.301724	-0.295634	-0.308838	-0.27965	-0.347122	-0.303061	-0.296383	-0.293172	-0.33714	-0.305383	-0.325822	-0.295102	-0.346747	-0.30511	-0.297771	-0.284416
1873	-0.302639	-0.296268	-0.288579	-0.338983	-0.290561	-0.311678	-0.324961	-0.282483	-0.295825	-0.306587	-0.301535	-0.295979	-0.317014	-0.34042	-0.304002	-0.338269	-0.300631	-0.308681	-0.298191	-0.296969	-0.297817	-0.297657	-0.342511	-0.30213	-0.325785	-0.301869	-0.316659	-0.30203	-0.319961	-0.305943	-0.286599	-0.340068	-0.290451	-0.301724	-0.295634	-0.308838	-0.27965	-0.347122	-0.303061	-0.296383	-0.297366	-0.33714	-0.298855	-0.325822	-0.295102	-0.346747	-0.30511	-0.297771	-0.284416
1875	-0.302639	-0.292713	-0.288579	-0.348934	-0.290561	-0.311678	-0.324961	-0.28111	-0.295825	-0.306587	-0.301535	-0.295979	-0.317014	-0.34042	-0.304002	-0.338269	-0.300631	-0.308681	-0.298191	-0.303275	-0.297817	-0.294963	-0.342511	-0.30213	-0.325785	-0.301869	-0.316659	-0.30203	-0.319961	-0.305943	-0.276366	-0.324911	-0.290451	-0.301724	-0.295634	-0.308838	-0.27965	-0.347122	-0.303061	-0.296383	-0.304157	-0.330692	-0.298285	-0.325822	-0.295102	-0.346747	-0.30511	-0.297771	-0.284416
1877	-0.302639	-0.300378	-0.288579	-0.348934	-0.290561	-0.311678	-0.324961	-0.284376	-0.295825	-0.306587	-0.301535	-0.295979	-0.317014	-0.34042	-0.304002	-0.338269	-0.300631	-0.308681	-0.298191	-0.317824	-0.297817	-0.300774	-0.342511	-0.30213	-0.325785	-0.301869	-0.316659	-0.30203	-0.319961	-0.305943	-0.276155	-0.327432	-0.290451	-0.301724	-0.295634	-0.308838	-0.27965	-0.347122	-0.303061	-0.296383	-0.314042	-0.316561	-0.304812	-0.325822	-0.295102	-0.346747	-0.30511	-0.297771	-0.284416
1879	-0.302639	-0.303963	-0.288579	-0.348934	-0.290561	-0.30653	-0.324961	-0.291611	-0.295825	-0.306587	-0.301535	-0.295979	-0.317014	-0.34042	-0.304002	-0.338269	-0.300631	-0.308681	-0.298191	-0.324627	-0.297817	-0.303491	-0.342511	-0.30213	-0.325785	-0.296667	-0.316659	-0.30203	-0.319961	-0.305943	-0.277485	-0.338784	-0.290451	-0.301724	-0.295634	-0.300678	-0.27965	-0.347122	-0.303061	-0.296383	-0.316806	-0.322791	-0.306637	-0.325822	-0.295102	-0.346747	-0.30511	-0.297771	-0.284416
1881	-0.302639	-0.303963	-0.288579	-0.348934	-0.290561	-0.29686	-0.324961	-0.302331	-0.295825	-0.306587	-0.301535	-0.295979	-0.317014	-0.34042	-0.304002	-0.338269	-0.300631	-0.308681	-0.298191	-0.324627	-0.297817	-0.303491	-0.342511	-0.30213	-0.325785	-0.286895	-0.316659	-0.30203	-0.319961	-0.305943	-0.280167	-0.357897	-0.290451	-0.301724	-0.295634	-0.289352	-0.27965	-0.347122	-0.303061	-0.296383	-0.316806	-0.336922	-0.306637	-0.325822	-0.295102	-0.346747	-0.30511	-0.297771	-0.284416
1883	-0.302639	-0.303963	-0.288579	-0.348934	-0.290561	-0.2932	-0.324961	-0.304512	-0.295825	-0.306587	-0.301535	-0.295979	-0.317014	-0.34042	-0.304002	-0.338269	-0.300631	-0.308681	-0.298191	-0.324627	-0.297817	-0.303491	-0.328742	-0.30213	-0.325785	-0.282013	-0.316659	-0.30203	-0.319961	-0.305943	-0.28982	-0.361786	-0.290451	-0.301724	-0.295634	-0.300328	-0.27965	-0.347122	-0.303061	-0.296383	-0.316806	-0.33714	-0.306637	-0.325822	-0.295102	-0.346747	-0.30511	-0.297771	-0.284416
1885	-0.302639	-0.303963	-0.288579	-0.348934	-0.290561	-0.291921	-0.324961	-0.304512	-0.295825	-0.306587	-0.301535	-0.295979	-0.317014	-0.34042	-0.304002	-0.338269	-0.300631	-0.308681	-0.298191	-0.324627	-0.297817	-0.303491	-0.312402	-0.30213	-0.325785	-0.279415	-0.316659	-0.30203	-0.319961	-0.305943	-0.300558	-0.361786	-0.290451	-0.301724	-0.295634	-0.308838	-0.27965	-0.347122	-0.303061	-0.296383	-0.316806	-0.33714	-0.306637	-0.325822	-0.295102	-0.346747	-0.30511	-0.297771	-0.284416
1887	-0.302639	-0.303963	-0.288579	-0.348934	-0.290561	-0.303715	-0.324961	-0.304512	-0.295825	-0.306587	-0.301535	-0.295979	-0.317014	-0.34042	-0.304002	-0.338269	-0.300631	-0.308681	-0.298191	-0.324627	-0.297817	-0.303491	-0.310694	-0.30213	-0.325785	-0.29282	-0.316659	-0.30203	-0.319961	-0.305943	-0.300558	-0.361786	-0.290451	-0.301724	-0.295634	-0.308838	-0.27965	-0.347122	-0.303061	-0.296383	-0.316806	-0.33714	-0.306637	-0.325822	-0.295102	-0.346747	-0.30511	-0.297771	-0.284416
1889	-0.302639	-0.303963	-0.288579	-0.3426	-0.290561	-0.311678	-0.324961	-0.304512	-0.295825	-0.306587	-0.301535	-0.295979	-0.317014	-0.34042	-0.304002	-0.338269	-0.300631	-0.308681	-0.298191	-0.324627	-0.297817	-0.303491	-0.315712	-0.30213	-0.325785	-0.301869	-0.316659	-0.30203	-0.319961	-0.305943	-0.300558	-0.361786	-0.290451	-0.301724	-0.295634	-0.308838	-0.27965	-0.347122	-0.303061	-0.296383	-0.316806	-0.33714	-0.306637	-0.325822	-0.295102	-0.346747	-0.30511	-0.297771	-0.284416
1891	-0.302639	-0.303963	-0.288579	-0.323102	-0.290561	-0.311678	-0.324961	-0.304512	-0.295825	-0.306587	-0.301535	-0.295979	-0.317014	-0.34042	-0.304002	-0.338269	-0.300631	-0.308681	-0.298191	-0.324627	-0.297817	-0.303491	-0.334706	-0.30213	-0.325785	-0.301869	-0.316659	-0.30203	-0.319961	-0.305943	-0.300558	-0.361786	-0.290451	-0.301724	-0.295634	-0.308838	-0.27965	-0.347122	-0.303061	-0.296383	-0.316806	-0.33714	-0.306637	-0.325822	-0.295102	-0.346747	-0.30511	-0.297771	-0.284416
1893	-0.302639	-0.303963	-0.288579	-0.314726	-0.290561	-0.311678	-0.324961	-0.304512	-0.295825	-0.306587	-0.301535	-0.295979	-0.317014	-0.34042	-0.304002	-0.338269	-0.300631	-0.308681	-0.298191	-0.324627	-0.297817	-0.303491	-0.342511	-0.30213	-0.325785	-0.301869	-0.30862	-0.30203	-0.319961	-0.305943	-0.300558	-0.350284	-0.290451	-0.301724	-0.295634	-0.308838	-0.27965	-0.347122	-0.303061	-0.296383	-0.316806	-0.33714	-0.306637	-0.325822	-0.295102	-0.346747	-0.30511	-0.297771	-0.284416
1895	-0.302639	-0.303963	-0.288579	-0.314109	-0.290561	-0.311678	-0.324961	-0.304512	-0.295825	-0.306587	-0.301535	-0.295979	-0.317014	-0.34042	-0.304002	-0.338269	-0.300631	-0.308681	-0.298191	-0.324627	-0.297817	-0.303491	-0.342511	-0.30213	-0.325785	-0.301869	-0.294974	-0.30203	-0.319961	-0.305943	-0.300558	-0.33076	-0.290451	-0.301724	-0.295634	-0.308838	-0.27965	-0.347122	-0.303061	-0.296383	-0.316806	-0.33714	-0.306637	-0.325822	-0.295102	-0.346747	-0.30511	-0.297771	-0.284416
1897	-0.302639	-0.303963	-0.288579	-0.318064	-0.290561	-0.311678	-0.324961	-0.304512	-0.295825	-0.306587	-0.301535	-0.295979	-0.317014	-0.34042	-0.304002	-0.322288	-0.300631	-0.308681	-0.298191	-0.324627	-0.297817	-0.303491	-0.342511	-0.30213	-0.325785	-0.301869	-0.295489	-0.30203	-0.319961	-0.305943	-0.300558	-0.344555	-0.290451	-0.301724	-0.295634	-0.308838	-0.27965	-0.347122	-0.303061	-0.296383	-0.316806	-0.33714	-0.306637	-0.325822	-0.295102	-0.346747	-0.30511	-0.297771	-0.284416
1899	-0.302639	-0.303963	-0.288579	-0.324054	-0.290561	-0.311678	-0.324961	-0.304512	-0.295825	-0.306587	-0.301535	-0.295979	-0.317014	-0.34042	-0.304002	-0.30796	-0.300631	-0.308681	-0.298191	-0.324627	-0.297817	-0.303491	-0.342511	-0.30213	-0.325785	-0.300549	-0.299349	-0.30203	-0.319961	-0.305943	-0.300558	-0.361786	-0.290451	-0.301724	-0.295634	-0.304313	-0.27965	-0.347122	-0.300369	-0.296383	-0.316806	-0.33714	-0.306637	-0.325822	-0.295102	-0.341775	-0.30511	-0.297771	-0.284416
1901	-0.302639	-0.303963	-0.288579	-0.339428	-0.290561	-0.311678	-0.324961	-0.304512	-0.295825	-0.306587	-0.301535	-0.295979	-0.317014	-0.34042	-0.304002	-0.326689	-0.300631	-0.308681	-0.298191	-0.324627	-0.297817	-0.303491	-0.342511	-0.30213	-0.325785	-0.289307	-0.310045	-0.30203	-0.319961	-0.305943	-0.300558	-0.361786	-0.290451	-0.301724	-0.295634	-0.289485	-0.27965	-0.347122	-0.291546	-0.296383	-0.316806	-0.33714	-0.306637	-0.325822	-0.295102	-0.325482	-0.30511	-0.297771	-0.284416
1903	-0.302639	-0.303963	-0.288579	-0.348934	-0.290561	-0.311678	-0.324961	-0.300238	-0.295825	-0.306587	-0.301535	-0.295979	-0.317014	-0.34042	-0.304002	-0.338269	-0.300631	-0.308681	-0.298191	-0.324627	-0.297817	-0.301126	-0.334131	-0.30213	-0.325785	-0.286646	-0.316659	-0.30203	-0.319961	-0.305943	-0.300558	-0.361786	-0.290451	-0.301724	-0.295634	-0.291538	-0.27965	-0.347122	-0.292768	-0.296383	-0.316806	-0.33714	-0.306637	-0.325822	-0.295102	-0.327738	-0.30511	-0.297771	-0.284416
1905	-0.302639	-0.303963	-0.288579	-0.348934	-0.290561	-0.311678	-0.324961	-0.289039	-0.295825	-0.306587	-0.301535	-0.295979	-0.317014	-0.34042	-0.304002	-0.338269	-0.300631	-0.308681	-0.298191	-0.324627	-0.297817	-0.29493	-0.312176	-0.30213	-0.325785	-0.297888	-0.316659	-0.30203	-0.319961	-0.305943	-0.300558	-0.361786	-0.290451	-0.301724	-0.295634	-0.306367	-0.27965	-0.347122	-0.30159	-0.296383	-0.316806	-0.33714	-0.306637	-0.325822	-0.295102	-0.344031	-0.30511	-0.297771	-0.284416
1907	-0.302639	-0.303963	-0.288579	-0.335662	-0.290561	-0.311678	-0.324961	-0.280463	-0.295825	-0.306587	-0.301535	-0.295979	-0.317014	-0.34042	-0.304002	-0.338269	-0.295033	-0.308681	-0.298191	-0.324627	-0.297817	-0.296738	-0.318581	-0.30213	-0.325785	-0.301869	-0.316659	-0.30203	-0.319961	-0.305943	-0.300558	-0.343791	-0.290451	-0.301724	-0.295634	-0.308838	-0.27965	-0.347122	-0.303061	-0.296383	-0.316806	-0.33714	-0.306637	-0.325822	-0.295102	-0.346747	-0.30511	-0.297771	-0.284416
1909	-0.302639	-0.303963	-0.288579	-0.315111	-0.290561	-0.311678	-0.324961	-0.273324	-0.295825	-0.306587	-0.301535	-0.295979	-0.317014	-0.34042	-0.304002	-0.338269	-0.286367	-0.308681	-0.298191	-0.324627	-0.297817	-0.302934	-0.340536	-0.30213	-0.325785	-0.301869	-0.316659	-0.30203	-0.319961	-0.305943	-0.300558	-0.31593	-0.290451	-0.301724	-0.295634	-0.308838	-0.27965	-0.347122	-0.303061	-0.295095	-0.316806	-0.33714	-0.306637	-0.325822	-0.295102	-0.346747	-0.30511	-0.297771	-0.284416
1911	-0.302639	-0.303963	-0.288579	-0.331965	-0.290561	-0.311678	-0.324961	-0.28937	-0.295825	-0.306587	-0.301535	-0.295979	-0.30512	-0.34042	-0.304002	-0.338269	-0.28492	-0.308681	-0.29356	-0.324627	-0.297817	-0.303491	-0.342511	-0.293247	-0.311307	-0.292738	-0.30217	-0.30203	-0.310615	-0.305943	-0.300558	-0.338779	-0.290451	-0.301724	-0.295634	-0.308838	-0.27965	-0.347122	-0.303061	-0.281871	-0.316806	-0.33714	-0.306637	-0.325822	-0.295102	-0.346747	-0.30511	-0.297771	-0.284416
1913	-0.302639	-0.303963	-0.288579	-0.346413	-0.290561	-0.311678	-0.321504	-0.302239	-0.295825	-0.306587	-0.301535	-0.295979	-0.296604	-0.34042	-0.304002	-0.334071	-0.285952	-0.308681	-0.290244	-0.321781	-0.297817	-0.302378	-0.342511	-0.286887	-0.300942	-0.286201	-0.2862	-0.30203	-0.303925	-0.305943	-0.300558	-0.361786	-0.288374	-0.301724	-0.295634	-0.308838	-0.27965	-0.340652	-0.303061	-0.278211	-0.316806	-0.33714	-0.306637	-0.325822	-0.295102	-0.346747	-0.30511	-0.297771	-0.284416
1915	-0.302639	-0.303963	-0.288579	-0.331943	-0.290561	-0.311678	-0.301661	-0.289194	-0.295825	-0.306587	-0.301535	-0.295979	-0.309675	-0.34042	-0.304002	-0.309974	-0.295352	-0.308681	-0.295333	-0.305444	-0.297817	-0.295993	-0.342511	-0.296648	-0.316851	-0.296235	-0.269998	-0.30203	-0.314194	-0.305943	-0.300558	-0.361786	-0.276454	-0.301724	-0.295634	-0.308838	-0.27965	-0.322758	-0.303061	-0.291434	-0.316806	-0.33714	-0.306637	-0.325822	-0.295102	-0.346747	-0.30511	-0.297771	-0.284416
1917	-0.302639	-0.303963	-0.288579	-0.322344	-0.290561	-0.311678	-0.299218	-0.287587	-0.295825	-0.306587	-0.301535	-0.295979	-0.317014	-0.34042	-0.304002	-0.297012	-0.296912	-0.308681	-0.298191	-0.303433	-0.297817	-0.292689	-0.342511	-0.297386	-0.32124	-0.301869	-0.274983	-0.30203	-0.315393	-0.305943	-0.300558	-0.353191	-0.274986	-0.301724	-0.295634	-0.308838	-0.27965	-0.327257	-0.303061	-0.296383	-0.316806	-0.33714	-0.306637	-0.325822	-0.295102	-0.346747	-0.30511	-0.293634	-0.284416
1919	-0.302639	-0.303963	-0.288579	-0.318985	-0.290561	-0.311678	-0.31906	-0.300633	-0.295825	-0.306587	-0.301535	-0.295979	-0.317014	-0.34042	-0.304002	-0.298313	-0.288431	-0.308681	-0.298191	-0.319769	-0.297817	-0.29333	-0.342511	-0.286563	-0.310872	-0.301869	-0.307106	-0.30203	-0.304974	-0.305943	-0.300558	-0.333589	-0.286906	-0.301724	-0.295634	-0.308838	-0.27965	-0.34515	-0.303061	-0.296383	-0.316806	-0.33714	-0.306637	-0.325822	-0.295102	-0.346747	-0.30511	-0.287022	-0.284416
1921	-0.302639	-0.303963	-0.288579	-0.316071	-0.290561	-0.311678	-0.324961	-0.294719	-0.295825	-0.306587	-0.301535	-0.295979	-0.304362	-0.34042	-0.304002	-0.301119	-0.291868	-0.308681	-0.294865	-0.311675	-0.297817	-0.292239	-0.325602	-0.284584	-0.315074	-0.293632	-0.316659	-0.30203	-0.309196	-0.305943	-0.300558	-0.326126	-0.290451	-0.301724	-0.295634	-0.308838	-0.27965	-0.347122	-0.303061	-0.287804	-0.306607	-0.323379	-0.306637	-0.325822	-0.295102	-0.346747	-0.30511	-0.292177	-0.284416
1923	-0.302639	-0.303963	-0.288579	-0.313344	-0.290561	-0.311678	-0.324961	-0.280781	-0.295825	-0.306587	-0.301535	-0.295979	-0.286355	-0.34042	-0.304002	-0.304562	-0.300349	-0.308681	-0.29013	-0.293241	-0.297817	-0.290415	-0.301536	-0.286349	-0.325441	-0.281908	-0.316659	-0.30203	-0.319615	-0.305943	-0.300558	-0.323802	-0.290451	-0.301724	-0.295634	-0.308838	-0.27965	-0.347122	-0.303061	-0.28113	-0.297153	-0.312674	-0.306637	-0.325822	-0.295102	-0.346747	-0.30511	-0.297771	-0.284416
1925	-0.302639	-0.303963	-0.288579	-0.333127	-0.290561	-0.311678	-0.324961	-0.293794	-0.295825	-0.306587	-0.301535	-0.295979	-0.303167	-0.34042	-0.293556	-0.323387	-0.292391	-0.308681	-0.29455	-0.293545	-0.297817	-0.288246	-0.306351	-0.285072	-0.325785	-0.292854	-0.316659	-0.30203	-0.319961	-0.305943	-0.300558	-0.344924	-0.290451	-0.301724	-0.295634	-0.308838	-0.27965	-0.347122	-0.303061	-0.290772	-0.298732	-0.32814	-0.306637	-0.325822	-0.295102	-0.346747	-0.30511	-0.297771	-0.284416
1927	-0.302639	-0.303963	-0.288579	-0.345338	-0.290561	-0.311678	-0.320996	-0.304512	-0.295825	-0.306587	-0.301535	-0.295979	-0.313833	-0.34042	-0.285832	-0.333348	-0.287806	-0.308681	-0.298191	-0.294651	-0.297817	-0.287354	-0.315033	-0.286422	-0.325785	-0.301869	-0.316659	-0.30203	-0.317614	-0.305943	-0.300558	-0.35497	-0.290451	-0.301724	-0.295634	-0.308838	-0.27965	-0.347122	-0.303061	-0.296383	-0.303782	-0.33714	-0.306637	-0.325822	-0.295102	-0.346747	-0.30511	-0.297771	-0.284416
1929	-0.302639	-0.303963	-0.288579	-0.329767	-0.290561	-0.311678	-0.303833	-0.304512	-0.295825	-0.306587	-0.301535	-0.295979	-0.300061	-0.34042	-0.288365	-0.312043	-0.296329	-0.308681	-0.298191	-0.296283	-0.297817	-0.29075	-0.333293	-0.296861	-0.325785	-0.301869	-0.316659	-0.30203	-0.307455	-0.305943	-0.300558	-0.325464	-0.290451	-0.301724	-0.295634	-0.308838	-0.27965	-0.347122	-0.303061	-0.296383	-0.313665	-0.33714	-0.306637	-0.325822	-0.295102	-0.346747	-0.30511	-0.297771	-0.284416
1931	-0.302639	-0.303963	-0.288579	-0.329618	-0.290561	-0.311678	-0.294207	-0.304512	-0.295825	-0.306587	-0.301535	-0.295979	-0.293665	-0.34042	-0.29374	-0.302389	-0.300631	-0.308681	-0.298191	-0.297958	-0.297817	-0.292782	-0.330594	-0.30213	-0.320454	-0.297438	-0.309453	-0.30203	-0.301078	-0.305943	-0.300558	-0.312957	-0.290451	-0.301724	-0.295634	-0.300402	-0.27965	-0.347122	-0.303061	-0.296383	-0.316806	-0.33714	-0.306637	-0.325822	-0.295102	-0.346747	-0.30511	-0.293648	-0.284416
1933	-0.302639	-0.303963	-0.288579	-0.345188	-0.290561	-0.311678	-0.292265	-0.304512	-0.295825	-0.306587	-0.301535	-0.295979	-0.294789	-0.34042	-0.302011	-0.304612	-0.300631	-0.308681	-0.298191	-0.299678	-0.297817	-0.293422	-0.30653	-0.30213	-0.309689	-0.288489	-0.294904	-0.30203	-0.298558	-0.305943	-0.300558	-0.317778	-0.290451	-0.301724	-0.295634	-0.288036	-0.27965	-0.347122	-0.303061	-0.296383	-0.316806	-0.33714	-0.306637	-0.325822	-0.295102	-0.346747	-0.30511	-0.287604	-0.284416
1935	-0.302639	-0.303963	-0.288579	-0.348934	-0.290561	-0.311678	-0.306306	-0.304512	-0.295825	-0.306587	-0.301535	-0.295979	-0.304664	-0.34042	-0.304002	-0.319637	-0.29367	-0.308681	-0.298191	-0.310826	-0.297817	-0.297913	-0.299645	-0.294206	-0.306437	-0.293132	-0.292977	-0.30203	-0.29764	-0.305943	-0.300558	-0.317013	-0.290451	-0.301724	-0.295634	-0.299073	-0.27965	-0.347122	-0.303061	-0.296383	-0.316806	-0.33714	-0.300114	-0.325822	-0.295102	-0.346747	-0.30511	-0.292999	-0.284416
1937	-0.302639	-0.303963	-0.288579	-0.348336	-0.290561	-0.311678	-0.324961	-0.304512	-0.295825	-0.306265	-0.301535	-0.295979	-0.316573	-0.34042	-0.304002	-0.338269	-0.284726	-0.308681	-0.298191	-0.32432	-0.297817	-0.303381	-0.298839	-0.284263	-0.30586	-0.301869	-0.295295	-0.30203	-0.297547	-0.305943	-0.300558	-0.314609	-0.290451	-0.301724	-0.295634	-0.308838	-0.27965	-0.347122	-0.303061	-0.296383	-0.316806	-0.33714	-0.296122	-0.325822	-0.295102	-0.346747	-0.30511	-0.297771	-0.284416
1939	-0.302639	-0.303963	-0.288579	-0.322942	-0.290561	-0.311678	-0.324961	-0.304512	-0.295825	-0.292627	-0.301535	-0.295979	-0.297857	-0.34042	-0.304002	-0.338269	-0.284992	-0.308681	-0.298191	-0.311306	-0.297817	-0.298731	-0.324345	-0.294698	-0.317497	-0.301869	-0.307772	-0.30203	-0.310638	-0.305943	-0.300558	-0.317624	-0.290451	-0.301724	-0.295634	-0.308838	-0.27965	-0.347122	-0.303061	-0.296383	-0.316806	-0.33714	-0.303015	-0.325822	-0.295102	-0.346747	-0.30511	-0.297771	-0.284416
1941	-0.302639	-0.303963	-0.288579	-0.304115	-0.290561	-0.311678	-0.324961	-0.304512	-0.291727	-0.286838	-0.301535	-0.295979	-0.286325	-0.34042	-0.304002	-0.338269	-0.287743	-0.308681	-0.298191	-0.301322	-0.297817	-0.296757	-0.342511	-0.30213	-0.325785	-0.301869	-0.316659	-0.30203	-0.319961	-0.305943	-0.300558	-0.318848	-0.290451	-0.301724	-0.295634	-0.308838	-0.27965	-0.347122	-0.303061	-0.296383	-0.316806	-0.33714	-0.306637	-0.325822	-0.295102	-0.346747	-0.30511	-0.297771	-0.284416
1943	-0.302639	-0.303963	-0.288579	-0.301541	-0.290561	-0.311678	-0.324961	-0.304512	-0.277487	-0.300476	-0.301535	-0.295979	-0.292572	-0.34042	-0.304002	-0.338269	-0.296643	-0.308681	-0.298191	-0.298837	-0.297817	-0.301407	-0.342511	-0.30213	-0.325785	-0.301869	-0.316659	-0.30203	-0.319961	-0.305943	-0.300558	-0.315641	-0.290451	-0.301724	-0.295634	-0.308838	-0.27965	-0.347122	-0.303061	-0.296383	-0.316806	-0.33714	-0.306637	-0.325822	-0.295102	-0.346747	-0.30511	-0.297771	-0.284416
1945	-0.302639	-0.303963	-0.288579	-0.307403	-0.290561	-0.311678	-0.324961	-0.304512	-0.278967	-0.306587	-0.301535	-0.295979	-0.302254	-0.34042	-0.304002	-0.338269	-0.300631	-0.308681	-0.298191	-0.298944	-0.297817	-0.300755	-0.342511	-0.30213	-0.325785	-0.301869	-0.316659	-0.30203	-0.319961	-0.305943	-0.300558	-0.329334	-0.290451	-0.301724	-0.295634	-0.308838	-0.27965	-0.347122	-0.303061	-0.296383	-0.309178	-0.33714	-0.306637	-0.325822	-0.295102	-0.346747	-0.30511	-0.297771	-0.284416
1947	-0.302639	-0.303963	-0.288579	-0.320113	-0.290561	-0.311678	-0.324961	-0.304512	-0.293207	-0.306587	-0.301535	-0.295979	-0.314722	-0.34042	-0.304002	-0.338269	-0.300631	-0.308681	-0.298191	-0.301155	-0.297817	-0.295798	-0.342511	-0.30213	-0.325785	-0.301869	-0.316659	-0.30203	-0.319961	-0.305943	-0.300558	-0.356746	-0.290451	-0.301724	-0.295634	-0.308838	-0.27965	-0.347122	-0.303061	-0.296383	-0.298907	-0.33714	-0.306637	-0.325822	-0.295102	-0.346747	-0.30511	-0.297771	-0.284416
1949	-0.302639	-0.303963	-0.288579	-0.334902	-0.290561	-0.311678	-0.324961	-0.304512	-0.295825	-0.306587	-0.301535	-0.295979	-0.317014	-0.34042	-0.304002	-0.338269	-0.300631	-0.308681	-0.298191	-0.312407	-0.297817	-0.298933	-0.342511	-0.30213	-0.325785	-0.292749	-0.316659	-0.30203	-0.319961	-0.305943	-0.300558	-0.361786	-0.290451	-0.301724	-0.295634	-0.308838	-0.27965	-0.347122	-0.303061	-0.296383	-0.309234	-0.33714	-0.306637	-0.325822	-0.295102	-0.346747	-0.30511	-0.297771	-0.284416
1951	-0.302639	-0.303963	-0.288579	-0.348934	-0.290561	-0.311678	-0.324961	-0.304512	-0.295825	-0.306587	-0.301535	-0.295979	-0.317014	-0.34042	-0.304002	-0.338269	-0.300631	-0.308681	-0.298191	-0.324627	-0.297817	-0.303491	-0.342511	-0.30213	-0.325785	-0.283371	-0.316659	-0.30203	-0.319961	-0.305943	-0.300558	-0.361786	-0.290451	-0.301724	-0.295634	-0.308838	-0.27965	-0.347122	-0.303061	-0.296383	-0.316806	-0.33714	-0.306637	-0.325822	-0.295102	-0.346747	-0.30511	-0.297771	-0.284416
1953	-0.302639	-0.303963	-0.288579	-0.348934	-0.290561	-0.311678	-0.324961	-0.304512	-0.295825	-0.306587	-0.301535	-0.295979	-0.317014	-0.34042	-0.304002	-0.338269	-0.300631	-0.308681	-0.298191	-0.324627	-0.297817	-0.303491	-0.342511	-0.30213	-0.325785	-0.294545	-0.316659	-0.30203	-0.319961	-0.305943	-0.300558	-0.361786	-0.290451	-0.301724	-0.295634	-0.308838	-0.27965	-0.347122	-0.303061	-0.296383	-0.316806	-0.33714	-0.306637	-0.325822	-0.295102	-0.346747	-0.30511	-0.297771	-0.284416
1955	-0.302639	-0.303963	-0.288579	-0.348934	-0.290561	-0.311678	-0.324961	-0.304512	-0.295825	-0.306587	-0.301535	-0.295979	-0.317014	-0.34042	-0.304002	-0.338269	-0.300631	-0.308681	-0.298191	-0.324627	-0.297817	-0.303491	-0.342511	-0.30213	-0.325785	-0.301869	-0.316659	-0.30203	-0.319961	-0.305943	-0.300558	-0.361786	-0.290451	-0.301724	-0.295634	-0.308838	-0.27965	-0.347122	-0.303061	-0.296383	-0.316806	-0.33714	-0.306637	-0.325822	-0.295102	-0.346747	-0.30511	-0.297771	-0.284416
1957	-0.302639	-0.303963	-0.288579	-0.348934	-0.290561	-0.311678	-0.324961	-0.304512	-0.295825	-0.306587	-0.301535	-0.295979	-0.317014	-0.34042	-0.304002	-0.338269	-0.300631	-0.308681	-0.298191	-0.324627	-0.297817	-0.303491	-0.342511	-0.30213	-0.325785	-0.301869	-0.316659	-0.30203	-0.319961	-0.305943	-0.300558	-0.361786	-0.290451	-0.301724	-0.295634	-0.308838	-0.27965	-0.347122	-0.303061	-0.296383	-0.316806	-0.33714	-0.306637	-0.325822	-0.295102	-0.346747	-0.30511	-0.297771	-0.284416
1959	-0.302639	-0.303963	-0.288579	-0.348934	-0.290561	-0.311678	-0.324961	-0.304512	-0.295825	-0.306587	-0.301535	-0.295979	-0.317014	-0.34042	-0.304002	-0.338269	-0.300631	-0.308681	-0.298191	-0.324627	-0.297817	-0.303491	-0.342511	-0.30213	-0.325785	-0.301869	-0.316659	-0.30203	-0.319961	-0.305943	-0.300558	-0.361786	-0.290451	-0.301724	-0.295634	-0.308838	-0.27965	-0.347122	-0.303061	-0.296383	-0.316806	-0.33714	-0.306637	-0.325822	-0.295102	-0.346747	-0.30511	-0.297771	-0.284416
1961	-0.302639	-0.303963	-0.288579	-0.348934	-0.290561	-0.311678	-0.324961	-0.304512	-0.295825	-0.306587	-0.301535	-0.295979	-0.317014	-0.34042	-0.304002	-0.338269	-0.300631	-0.308681	-0.298191	-0.324627	-0.297817	-0.303491	-0.342511	-0.30213	-0.325785	-0.301869	-0.316659	-0.30203	-0.319961	-0.305943	-0.300558	-0.361786	-0.290451	-0.301724	-0.295634	-0.308838	-0.27965	-0.347122	-0.303061	-0.296383	-0.316806	-0.33714	-0.306637	-0.325822	-0.295102	-0.346747	-0.30511	-0.297771	-0.284416
1963	-0.302639	-0.303963	-0.288579	-0.348934	-0.290561	-0.311678	-0.324961	-0.304512	-0.295825	-0.306587	-0.301535	-0.295979	-0.317014	-0.34042	-0.304002	-0.338269	-0.300631	-0.308681	-0.298191	-0.324627	-0.297817	-0.303491	-0.342511	-0.30213	-0.325785	-0.301869	-0.316659	-0.30203	-0.319961	-0.305943	-0.300558	-0.361786	-0.290451	-0.301724	-0.295634	-0.308838	-0.27965	-0.347122	-0.303061	-0.296383	-0.316806	-0.33714	-0.306637	-0.325822	-0.295102	-0.346747	-0.30511	-0.297771	-0.284416
1965	-0.302639	-0.303963	-0.288579	-0.348934	-0.290561	-0.311678	-0.324961	-0.304512	-0.295825	-0.306587	-0.301535	-0.295979	-0.317014	-0.34042	-0.304002	-0.338269	-0.300631	-0.308681	-0.298191	-0.324627	-0.297817	-0.303491	-0.342511	-0.30213	-0.325785	-0.301869	-0.316659	-0.30203	-0.319961	-0.305943	-0.300558	-0.361786	-0.290451	-0.301724	-0.295634	-0.308838	-0.27965	-0.347122	-0.303061	-0.296383	-0.316806	-0.33714	-0.306637	-0.325822	-0.295102	-0.346747	-0.30511	-0.297771	-0.284416
1967	-0.302639	-0.303963	-0.288579	-0.348934	-0.290561	-0.311678	-0.324961	-0.304512	-0.295825	-0.306587	-0.301535	-0.295979	-0.317014	-0.34042	-0.304002	-0.338269	-0.300631	-0.308681	-0.298191	-0.324627	-0.297817	-0.303491	-0.342511	-0.30213	-0.325785	-0.301869	-0.316659	-0.30203	-0.319961	-0.305943	-0.300558	-0.361786	-0.290451	-0.301724	-0.295634	-0.308838	-0.27965	-0.347122	-0.303061	-0.296383	-0.316806	-0.33714	-0.306637	-0.325822	-0.295102	-0.346747	-0.30511	-0.297771	-0.284416
1969	-0.302639	-0.303963	-0.288579	-0.348934	-0.290561	-0.311678	-0.324961	-0.304512	-0.295825	-0.306587	-0.301535	-0.295979	-0.317014	-0.34042	-0.304002	-0.338269	-0.300631	-0.308681	-0.298191	-0.324627	-0.297817	-0.303491	-0.342511	-0.30213	-0.325785	-0.301869	-0.316659	-0.30203	-0.319961	-0.305943	-0.300558	-0.361786	-0.290451	-0.301724	-0.295634	-0.308838	-0.27965	-0.347122	-0.303061	-0.296383	-0.316806	-0.33714	-0.306637	-0.325822	-0.295102	-0.346747	-0.30511	-0.297771	-0.284416
1971	-0.302639	-0.303963	-0.288579	-0.348934	-0.290561	-0.311678	-0.324961	-0.304512	-0.295825	-0.306587	-0.301535	-0.295979	-0.317014	-0.34042	-0.304002	-0.338269	-0.300631	-0.308681	-0.298191	-0.324627	-0.297817	-0.303491	-0.342511	-0.30213	-0.325785	-0.301869	-0.316659	-0.30203	-0.319961	-0.305943	-0.300558	-0.361786	-0.290451	-0.301724	-0.295634	-0.308838	-0.27965	-0.347122	-0.303061	-0.296383	-0.316806	-0.33714	-0.306637	-0.325822	-0.295102	-0.346747	-0.30511	-0.297771	-0.284416
1973	-0.302639	-0.303963	-0.288579	-0.348934	-0.290561	-0.311678	-0.324961	-0.304512	-0.295825	-0.306587	-0.301535	-0.295979	-0.317014	-0.34042	-0.304002	-0.338269	-0.300631	-0.308681	-0.298191	-0.324627	-0.297817	-0.303491	-0.342511	-0.30213	-0.325785	-0.301869	-0.316659	-0.30203	-0.319961	-0.305943	-0.300558	-0.361786	-0.290451	-0.301724	-0.295634	-0.308838	-0.27965	-0.347122	-0.303061	-0.296383	-0.316806	-0.33714	-0.306637	-0.325822	-0.295102	-0.346747	-0.30511	-0.297771	-0.284416
1975	-0.302639	-0.303963	-0.288579	-0.348934	-0.290561	-0.311678	-0.324961	-0.304512	-0.295825	-0.306587	-0.301535	-0.295979	-0.317014	-0.34042	-0.304002	-0.338269	-0.300631	-0.308681	-0.298191	-0.324627	-0.297817	-0.303491	-0.342511	-0.30213	-0.325785	-0.301869	-0.316659	-0.30203	-0.319961	-0.305943	-0.300558	-0.361786	-0.290451	-0.301724	-0.295634	-0.308838	-0.27965	-0.347122	-0.303061	-0.296383	-0.316806	-0.33714	-0.306637	-0.325822	-0.295102	-0.346747	-0.30511	-0.297771	-0.284416
[truncated: 762 more rows]
[truncated: 132 more columns]
